# Supplementary material for: Transcriptome and proteome analysis of the antitumor activity of maslinic acid against pancreatic cancer cells
Source: publisher site journal article supplement (doi:10.18632/aging.203623), 2021-10-12
Supplement: Supplementary file [file aging-v13i19-203623-supplementary-material-SD1.pdf]

SUPPLEMENTARY FIGURES

A

| Sample     | Raw Data |       | Valid Data |       | Valid Ratio(reads) | Q20%  | Q30%  | GC content% |
|------------|----------|-------|------------|-------|--------------------|-------|-------|-------------|
|            | Read     | Base  | Read       | Base  |                    |       |       |             |
| MA_PANC1_1 | 39137302 | 5.87G | 38522308   | 5.78G | 98.43              | 99.98 | 98.58 | 51          |
| MA_PANC1_2 | 44294386 | 6.64G | 43614786   | 6.54G | 98.47              | 99.98 | 98.41 | 52          |
| MA_PANC1_3 | 40328490 | 6.05G | 39675886   | 5.95G | 98.38              | 99.98 | 98.46 | 50.50       |
| PANC1_1    | 48795828 | 7.32G | 48019678   | 7.20G | 98.41              | 99.98 | 98.39 | 50          |
| PANC1_2    | 45533736 | 6.83G | 44840284   | 6.73G | 98.48              | 99.98 | 98.63 | 50.50       |
| PANC1_3    | 41173482 | 6.18G | 40521082   | 6.08G | 98.42              | 99.98 | 98.45 | 50          |

B

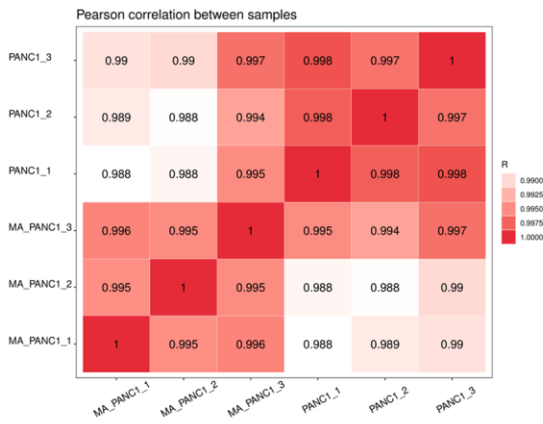

C

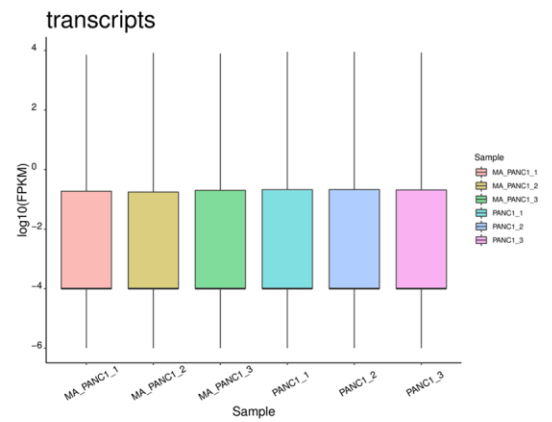

Supplementary Figure 1. (A) Correlation analysis results of transcriptome sequencing data. (B) Overview of quality control of transcriptome sequencing data. (C) Statistical graph of gene expression value distribution of transcriptome sequencing data.

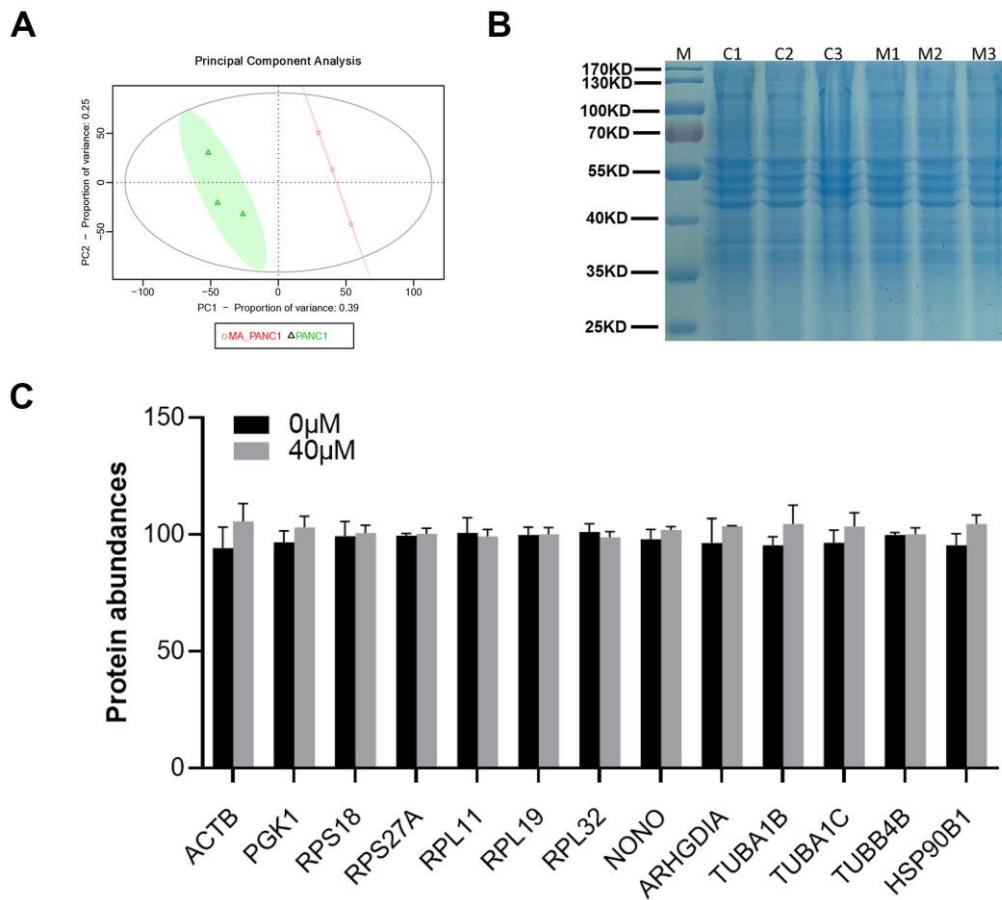

**Supplementary Figure 2.** (A) Principal component analysis of proteomic sequencing data. (B) SDS-PAGE test results of proteomic sequencing data. (C) Protein abundances of housekeeping genes.
