# Supplementary material for: Transcriptome and proteome analysis of the antitumor activity of maslinic acid against pancreatic cancer cells
Source: Aging (Albany NY). 2021 Oct 12;13(19):23308–27. doi: 10.18632/aging.203623 (PMC8544341; doi:10.18632/aging.203623)
Supplement: Supplementary Table 1 [file aging-13-203623-s002.xlsx]

## Sheet: Sheet1
Supplementary Table 1. A complete list of genes identified in PANC-1 cells with and without MA treatment.
gene_id	gene_name	transcript_id	GO	KEGG	Description	trans_type	FPKM.MA_PANC1_1	FPKM.MA_PANC1_2	FPKM.MA_PANC1_3	FPKM.PANC1_1	FPKM.PANC1_2	FPKM.PANC1_3	Fold Change(fc)	log2(fc)	pval	regulation	significant
ENSG00000268083	AC008982	ENST00000594769;ENST00000602021	GO:0003676(nucleic acid binding);GO:0003723(RNA binding);GO:0003824(catalytic activity);GO:0005739(mitochondrion);GO:0051750(delta3,5-delta2,4-dienoyl-CoA isomerase activity);GO:0051750(delta3,5-delta2,4-dienoyl-CoA isomerase activity)	NA	novel protein	protein_coding	10.5991	5.70515	0.0001	0.0001	0.0001	0.0001	54347.9	15.7299	1.41287e-08	up	yes
ENSG00000285625	AC117378	ENST00000647707	GO:0003896(DNA primase activity);GO:0006269(DNA replication, synthesis of RNA primer)	NA	novel protein	protein_coding	3.82468	0.0001	8.92439	0.0001	0.0001	0.0001	42497.2	15.3751	1.05056e-07	up	yes
ENSG00000125954	CHURC1-FNTB	ENST00000551823;ENST00000549987;ENST00000552941;ENST00000553743	GO:0003824(catalytic activity);GO:0004659(prenyltransferase activity);GO:0004660(protein farnesyltransferase activity);GO:0005965(protein farnesyltransferase complex);GO:0007275(multicellular organism development);GO:0008270(zinc ion binding);GO:0016740(transferase activity);GO:0018342(protein prenylation);GO:0018343(protein farnesylation);GO:0045893(positive regulation of transcription, DNA-temp…	NA	CHURC1-FNTB readthrough [Source:HGNC Symbol;Acc:HGNC:42960]	nonsense_mediated_decay;protein_coding	0.446591	0.0001	1.77258	0.0001	0.0001	0.0001	7397.58	12.8528	5.42875e-07	up	yes
ENSG00000285304	Z83844	ENST00000451997	GO:0005515(protein binding);GO:0005737(cytoplasm);GO:0007165(signal transduction)	NA	novel protein	protein_coding	9.35205	12.4932	10.5061	0.064538	0.000218	0.0001	498.817	8.96237	1.00187e-57	up	yes
ENSG00000262160	AC020978	ENST00000571197	NA	NA	novel transcript, antisense to NFATC3	antisense	1.76626	0.35338	2.45506	0.001323	0.0271	0.010573	117.312	6.87421	8.17195e-16	up	yes
ENSG00000286239	AC093884	ENST00000650969	NA	NA	novel protein, WDFY1-AP1S3 readthrough	nonsense_mediated_decay	0.002961	0.373422	0.372747	0.01131	0.007662	0.0001	39.279	5.29569	1.79012e-05	up	yes
ENSG00000241489	AC244197	ENST00000422081;ENST00000427113;ENST00000441880;ENST00000651111	GO:0003824(catalytic activity);GO:0004423(iduronate-2-sulfatase activity);GO:0008484(sulfuric ester hydrolase activity);GO:0008484(sulfuric ester hydrolase activity)	NA	novel protein	protein_coding;processed_transcript	3.17821	0.0544384	2.92432	0.0456551	0.0596931	0.0924279	31.131	4.96028	1.1171e-07	up	yes
ENSG00000257379	AC023509	ENST00000547717	NA	NA	novel transcript	processed_transcript	32.5254	33.6923	29.1336	0.0001	2.88002	1.81716	20.2993	4.34336	2.65875e-05	up	yes
ENSG00000239704	CDRT4	ENST00000619038;ENST00000524205;ENST00000519354;ENST00000520956	GO:0005515(protein binding);GO:0005515(protein binding)	NA	CMT1A duplicated region transcript 4 [Source:HGNC Symbol;Acc:HGNC:14383]	protein_coding;processed_transcript	0.526015	3.58994	0.364202	0.0452403	0.21983	0.0898486	12.623	3.65799	1.47085e-05	up	yes
ENSG00000254870	ATP6V1G2-DDX39B	ENST00000376185;ENST00000480131;ENST00000475917	GO:0006811(ion transport);GO:0008553(proton-exporting ATPase activity, phosphorylative mechanism);GO:0016471(vacuolar proton-transporting V-type ATPase complex);GO:0042626(ATPase activity, coupled to transmembrane movement of substances);GO:1902600(proton transmembrane transport);GO:1902600(proton transmembrane transport)	NA	ATP6V1G2-DDX39B readthrough (NMD candidate) [Source:HGNC Symbol;Acc:HGNC:41999]	nonsense_mediated_decay;processed_transcript	3.49032	2.25198	36.7716	1.66632	1.33815	1.68305	9.06959	3.18104	2.32665e-05	up	yes
ENSG00000261611	AC010547	ENST00000561908;ENST00000648971	GO:0003676(nucleic acid binding);GO:0005634(nucleus);GO:0006355(regulation of transcription, DNA-templated);GO:0006355(regulation of transcription, DNA-templated)	NA	novel transcript	nonsense_mediated_decay	0.294343	0.0136765	0.517798	0.0480899	0.0520778	0.00555797	7.81095	2.9655	0.00235484	up	yes
ENSG00000178878	APOLD1	ENST00000534843;ENST00000326765;ENST00000588943;ENST00000356591;ENST00000540583	GO:0001525(angiogenesis);GO:0001666(response to hypoxia);GO:0005576(extracellular region);GO:0005654(nucleoplasm);GO:0005829(cytosol);GO:0005886(plasma membrane);GO:0006869(lipid transport);GO:0007275(multicellular organism development);GO:0008289(lipid binding);GO:0016020(membrane);GO:0016021(integral component of membrane);GO:0030154(cell differentiation);GO:0042118(endothelial cell activation)…	NA	apolipoprotein L domain containing 1 [Source:HGNC Symbol;Acc:HGNC:25268]	nonsense_mediated_decay;protein_coding;retained_intron	0.517172	3.19483	13.3625	1.47335	0.522638	0.693592	6.34839	2.66639	0.000331942	up	yes
ENSG00000255639	AC005833	ENST00000648836;ENST00000543979;ENST00000544741	GO:0003824(catalytic activity);GO:0050662(coenzyme binding);GO:0050662(coenzyme binding)	NA	novel protein	protein_coding;retained_intron;nonsense_mediated_decay	0.286593	0.546046	0.354644	0.127347	0.0001	0.119097	4.81571	2.26775	0.00624634	up	yes
ENSG00000285258	ATXN7	ENST00000295900;ENST00000474112;ENST00000474513	NA	NA	ataxin 7 [Source:HGNC Symbol;Acc:HGNC:10560]	protein_coding	2.49448	0.465976	0.309203	0.0520677	0.485057	0.145154	4.79227	2.26071	0.0043189	up	yes
ENSG00000257949	TEN1	ENST00000397640;ENST00000588202;ENST00000585710;ENST00000586891;ENST00000590676	GO:0000781(chromosome, telomeric region);GO:0000784(nuclear chromosome, telomeric region);GO:0003677(DNA binding);GO:0003697(single-stranded DNA binding);GO:0005515(protein binding);GO:0005634(nucleus);GO:0005694(chromosome);GO:0010521(telomerase inhibitor activity);GO:0016233(telomere capping);GO:0032211(negative regulation of telomere maintenance via telomerase);GO:0042162(telomeric DNA binding…	NA	TEN1, CST complex subunit [Source:HGNC Symbol;Acc:HGNC:37242]	protein_coding;retained_intron	1.41325	10.7936	6.6536	1.81436	1.4354	0.734276	4.73401	2.24306	0.000176642	up	yes
ENSG00000260269	AC105036	ENST00000568707;ENST00000566032;ENST00000565138;ENST00000567875	NA	NA	novel transcript	processed_transcript	1.12552	0.827108	0.421471	0.283011	0.0279047	0.244636	4.27341	2.09539	0.00301267	up	yes
ENSG00000101126	ADNP	ENST00000396029;ENST00000396032;ENST00000621696;ENST00000371602;ENST00000644386;ENST00000349014;ENST00000642364;ENST00000645081	GO:0000981(DNA-binding transcription factor activity, RNA polymerase II-specific);GO:0003676(nucleic acid binding);GO:0003677(DNA binding);GO:0003682(chromatin binding);GO:0005507(copper ion binding);GO:0005515(protein binding);GO:0005615(extracellular space);GO:0005634(nucleus);GO:0005737(cytoplasm);GO:0006357(regulation of transcription by RNA polymerase II);GO:0007614(short-term memory);GO:000…	NA	activity dependent neuroprotector homeobox [Source:HGNC Symbol;Acc:HGNC:15766]	protein_coding	14.3297	13.1492	14.6727	3.39829	3.78196	2.7456	4.24665	2.08633	1.26529e-29	up	yes
ENSG00000124120	TTPAL	ENST00000456317;ENST00000262605;ENST00000372904;ENST00000372906;ENST00000461134	GO:0016020(membrane);GO:0016020(membrane)	NA	alpha tocopherol transfer protein like [Source:HGNC Symbol;Acc:HGNC:16114]	protein_coding;retained_intron	4.14302	3.2175	5.57062	0.973286	1.1714	0.972183	4.14876	2.05268	1.35979e-14	up	yes
ENSG00000172780	RAB43	ENST00000315150;ENST00000393305;ENST00000476465;ENST00000393307;ENST00000615093;ENST00000457077;ENST00000393304;ENST00000393308	GO:0000139(Golgi membrane);GO:0000166(nucleotide binding);GO:0003924(GTPase activity);GO:0005515(protein binding);GO:0005525(GTP binding);GO:0005789(endoplasmic reticulum membrane);GO:0005794(Golgi apparatus);GO:0006886(intracellular protein transport);GO:0006888(endoplasmic reticulum to Golgi vesicle-mediated transport);GO:0007030(Golgi organization);GO:0016020(membrane);GO:0019068(virion assemb…	NA	RAB43, member RAS oncogene family [Source:HGNC Symbol;Acc:HGNC:19983]	protein_coding	5.3416	5.63857	3.50727	0.104438	0.128087	3.2647	4.14255	2.05052	0.0186964	up	yes
ENSG00000186026	ZNF284	ENST00000421176	GO:0000981(DNA-binding transcription factor activity, RNA polymerase II-specific);GO:0003676(nucleic acid binding);GO:0003677(DNA binding);GO:0003700(DNA-binding transcription factor activity);GO:0005622(intracellular);GO:0005634(nucleus);GO:0006355(regulation of transcription, DNA-templated);GO:0006357(regulation of transcription by RNA polymerase II);GO:0046872(metal ion binding)	05168(Herpes simplex virus 1 infection)	zinc finger protein 284 [Source:HGNC Symbol;Acc:HGNC:13078]	protein_coding	0.499154	0.259346	0.476684	0.091356	0.085921	0.134854	3.95726	1.9845	7.13282e-05	up	yes
ENSG00000248751	AC004997	ENST00000330168;ENST00000447976;ENST00000434291;ENST00000418047;ENST00000434987	GO:0005829(cytosol);GO:0034618(arginine binding);GO:0061700(GATOR2 complex);GO:1902531(regulation of intracellular signal transduction);GO:1903577(cellular response to L-arginine);GO:1904262(negative regulation of TORC1 signaling);GO:1904262(negative regulation of TORC1 signaling)	NA	novel protein	nonsense_mediated_decay;protein_coding	1.01263	1.58335	0.904288	0.295392	0.543112	0.0684572	3.85933	1.94835	0.00185532	up	yes
ENSG00000229124	VIM-AS1	ENST00000605833;ENST00000437232	NA	NA	VIM antisense RNA 1 [Source:HGNC Symbol;Acc:HGNC:44879]	antisense	1.32041	5.68961	0.577243	0.620015	0.912977	0.546243	3.64907	1.86753	0.00412523	up	yes
ENSG00000186787	SPIN2B	ENST00000434397;ENST00000460948;ENST00000333933;ENST00000275988;ENST00000374910	GO:0005515(protein binding);GO:0005634(nucleus);GO:0005654(nucleoplasm);GO:0005829(cytosol);GO:0006915(apoptotic process);GO:0007049(cell cycle);GO:0007276(gamete generation);GO:0035064(methylated histone binding);GO:0051726(regulation of cell cycle);GO:0051726(regulation of cell cycle)	NA	spindlin family member 2B [Source:HGNC Symbol;Acc:HGNC:33147]	protein_coding	2.01315	2.13207	2.52853	0.816204	0.431363	0.644026	3.52811	1.8189	3.60277e-05	up	yes
ENSG00000171475	WIPF2	ENST00000582781;ENST00000323571;ENST00000394103;ENST00000583130;ENST00000578304;ENST00000585043;ENST00000584296;ENST00000578623;ENST00000494757;ENST00000583268	GO:0000147(actin cortical patch assembly);GO:0003779(actin binding);GO:0005515(protein binding);GO:0005654(nucleoplasm);GO:0005737(cytoplasm);GO:0005829(cytosol);GO:0005856(cytoskeleton);GO:0005884(actin filament);GO:0005886(plasma membrane);GO:0006897(endocytosis);GO:0030048(actin filament-based movement);GO:0030479(actin cortical patch);GO:0038096(Fc-gamma receptor signaling pathway involved in…	04144(Endocytosis);04144(Endocytosis)	WAS/WASL interacting protein family member 2 [Source:HGNC Symbol;Acc:HGNC:30923]	nonsense_mediated_decay;protein_coding;retained_intron;processed_transcript	4.43524	6.2971	5.14471	1.89891	1.45055	1.19936	3.49037	1.80338	4.57343e-13	up	yes
ENSG00000257433	AC004241	ENST00000547799;ENST00000552133;ENST00000621159;ENST00000552502;ENST00000553045	NA	NA	novel transcript, antisense to ENDOU and RAPGEF3	antisense	0.241011	0.317872	0.237278	0.0797337	0.11764	0.033234	3.45245	1.78762	0.00121082	up	yes
ENSG00000251161	AC020661	ENST00000503052	NA	NA	novel transcript	lincRNA	0.83068	0.487825	0.623953	0.239901	0.227104	0.134182	3.23104	1.692	0.0013781	up	yes
ENSG00000134531	EMP1	ENST00000256951;ENST00000396301;ENST00000544053;ENST00000542474;ENST00000535134;ENST00000546357;ENST00000538364;ENST00000537612;ENST00000431267;ENST00000536383;ENST00000541935;ENST00000542289	GO:0005515(protein binding);GO:0005886(plasma membrane);GO:0007275(multicellular organism development);GO:0008219(cell death);GO:0008283(cell population proliferation);GO:0008544(epidermis development);GO:0016020(membrane);GO:0016021(integral component of membrane);GO:0016049(cell growth);GO:0032060(bleb assembly);GO:0032060(bleb assembly)	NA	epithelial membrane protein 1 [Source:HGNC Symbol;Acc:HGNC:3333]	protein_coding;processed_transcript;retained_intron	3.96198	2.90694	4.58144	1.26833	1.36135	1.00313	3.15193	1.65623	9.40738e-11	up	yes
ENSG00000214736	TOMM6	ENST00000398881;ENST00000398884	GO:0005739(mitochondrion);GO:0005741(mitochondrial outer membrane);GO:0005742(mitochondrial outer membrane translocase complex);GO:0015031(protein transport);GO:0016020(membrane);GO:0016236(macroautophagy);GO:0016236(macroautophagy)	NA	translocase of outer mitochondrial membrane 6 [Source:HGNC Symbol;Acc:HGNC:34528]	protein_coding	3.22284	122.467	108.606	23.7675	10.4903	41.6237	3.08765	1.62651	0.0314998	up	yes
ENSG00000110042	DTX4	ENST00000227451;ENST00000532982;ENST00000527475;ENST00000531902	GO:0004842(ubiquitin-protein transferase activity);GO:0005737(cytoplasm);GO:0005829(cytosol);GO:0007219(Notch signaling pathway);GO:0008270(zinc ion binding);GO:0016567(protein ubiquitination);GO:0016740(transferase activity);GO:0032479(regulation of type I interferon production);GO:0046872(metal ion binding);GO:0046872(metal ion binding)	04330(Notch signaling pathway);04330(Notch signaling pathway)	deltex E3 ubiquitin ligase 4 [Source:HGNC Symbol;Acc:HGNC:29151]	protein_coding;retained_intron;processed_transcript	0.347568	0.24269	0.692093	0.0969327	0.166675	0.157869	3.04252	1.60527	0.0013799	up	yes
ENSG00000243335	KCTD7	ENST00000640385;ENST00000639828;ENST00000640234;ENST00000638540;ENST00000639879;ENST00000640601;ENST00000640851;ENST00000638524;ENST00000443322;ENST00000275532;ENST00000449064	GO:0005515(protein binding);GO:0005737(cytoplasm);GO:0005829(cytosol);GO:0005886(plasma membrane);GO:0016020(membrane);GO:0030007(cellular potassium ion homeostasis);GO:0032411(positive regulation of transporter activity);GO:0043687(post-translational protein modification);GO:0051260(protein homooligomerization);GO:0060081(membrane hyperpolarization);GO:0090461(glutamate homeostasis);GO:0090461(g…	NA	potassium channel tetramerization domain containing 7 [Source:HGNC Symbol;Acc:HGNC:21957]	protein_coding;nonsense_mediated_decay	0.737567	0.809647	1.88047	0.273364	0.289427	0.565612	3.03764	1.60295	0.000329129	up	yes
ENSG00000268592	AL355312	ENST00000606915	NA	NA	novel transcript, antisense to LRP11, RAET1E and RAET1G	antisense	1.0567	1.3182	1.30873	0.723522	0.290737	0.236043	2.94619	1.55885	0.00374825	up	yes
ENSG00000166257	SCN3B	ENST00000392770;ENST00000299333;ENST00000530277;ENST00000527836;ENST00000527125;ENST00000528267	GO:0001518(voltage-gated sodium channel complex);GO:0005244(voltage-gated ion channel activity);GO:0005248(voltage-gated sodium channel activity);GO:0005272(sodium channel activity);GO:0005886(plasma membrane);GO:0006811(ion transport);GO:0006814(sodium ion transport);GO:0007399(nervous system development);GO:0010460(positive regulation of heart rate);GO:0010765(positive regulation of sodium ion …	NA	sodium voltage-gated channel beta subunit 3 [Source:HGNC Symbol;Acc:HGNC:20665]	protein_coding;retained_intron	0.251495	0.137457	0.119694	0.0215732	0.130158	0.021385	2.93817	1.55492	0.0233199	up	yes
ENSG00000185453	ZSWIM9	ENST00000614654;ENST00000328759;ENST00000593921	GO:0005515(protein binding);GO:0005634(nucleus);GO:0006511(ubiquitin-dependent protein catabolic process);GO:0007275(multicellular organism development);GO:0008270(zinc ion binding);GO:0008270(zinc ion binding)	NA	zinc finger SWIM-type containing 9 [Source:HGNC Symbol;Acc:HGNC:34495]	protein_coding;processed_transcript	2.17091	1.14606	3.40343	0.538355	1.23875	0.579563	2.85165	1.5118	0.00101168	up	yes
ENSG00000103066	PLA2G15	ENST00000565460;ENST00000219345;ENST00000566188;ENST00000568599;ENST00000568082;ENST00000566978;ENST00000562966;ENST00000565744;ENST00000444212;ENST00000413021;ENST00000562449;ENST00000564827	GO:0004622(lysophospholipase activity);GO:0005543(phospholipid binding);GO:0005576(extracellular region);GO:0005615(extracellular space);GO:0005654(nucleoplasm);GO:0005764(lysosome);GO:0006629(lipid metabolic process);GO:0006631(fatty acid metabolic process);GO:0006644(phospholipid metabolic process);GO:0006650(glycerophospholipid metabolic process);GO:0006672(ceramide metabolic process);GO:00083…	00564(Glycerophospholipid metabolism);04142(Lysosome);04142(Lysosome)	phospholipase A2 group XV [Source:HGNC Symbol;Acc:HGNC:17163]	retained_intron;protein_coding;processed_transcript;nonsense_mediated_decay	9.55192	5.61661	3.72091	1.59803	1.64699	3.41307	2.83707	1.5044	4.06201e-05	up	yes
ENSG00000161888	SPC24	ENST00000423327;ENST00000592540;ENST00000585486;ENST00000591396;ENST00000592967;ENST00000586708;ENST00000585567	GO:0000775(chromosome, centromeric region);GO:0000776(kinetochore);GO:0000777(condensed chromosome kinetochore);GO:0005515(protein binding);GO:0005634(nucleus);GO:0005694(chromosome);GO:0005730(nucleolus);GO:0005829(cytosol);GO:0007049(cell cycle);GO:0031262(Ndc80 complex);GO:0051301(cell division);GO:0051301(cell division)	NA	SPC24, NDC80 kinetochore complex component [Source:HGNC Symbol;Acc:HGNC:26913]	nonsense_mediated_decay;protein_coding	11.1971	11.9012	10.0539	2.97088	6.64824	2.47879	2.74032	1.45434	1.35122e-05	up	yes
ENSG00000176014	TUBB6	ENST00000417736;ENST00000590693;ENST00000590103;ENST00000587204;ENST00000586653;ENST00000591909;ENST00000317702;ENST00000586810;ENST00000591208;ENST00000586691;ENST00000590967;ENST00000590388;ENST00000592683;ENST00000591463	GO:0000166(nucleotide binding);GO:0000226(microtubule cytoskeleton organization);GO:0000278(mitotic cell cycle);GO:0003674(molecular_function);GO:0003924(GTPase activity);GO:0005200(structural constituent of cytoskeleton);GO:0005525(GTP binding);GO:0005634(nucleus);GO:0005737(cytoplasm);GO:0005856(cytoskeleton);GO:0005874(microtubule);GO:0007010(cytoskeleton organization);GO:0007017(microtubule-b…	04145(Phagosome);04540(Gap junction);05130(Pathogenic Escherichia coli infection);05130(Pathogenic Escherichia coli infection)	tubulin beta 6 class V [Source:HGNC Symbol;Acc:HGNC:20776]	retained_intron;protein_coding;nonsense_mediated_decay	95.2735	63.2239	18.693	17.7636	23.313	24.0987	2.71867	1.4429	0.00016157	up	yes
ENSG00000197405	C5AR1	ENST00000355085;ENST00000594787;ENST00000595501	GO:0000187(activation of MAPK activity);GO:0001856(complement component C5a binding);GO:0002430(complement receptor mediated signaling pathway);GO:0004875(complement receptor activity);GO:0004878(complement component C5a receptor activity);GO:0004930(G protein-coupled receptor activity);GO:0005886(plasma membrane);GO:0005887(integral component of plasma membrane);GO:0006915(apoptotic process);GO:…	04080(Neuroactive ligand-receptor interaction);04610(Complement and coagulation cascades);05150(Staphylococcus aureus infection);05150(Staphylococcus aureus infection)	complement C5a receptor 1 [Source:HGNC Symbol;Acc:HGNC:1338]	protein_coding;processed_transcript	0.290181	1.18263	1.06827	0.150319	0.682514	0.134107	2.62796	1.39394	0.038698	up	yes
ENSG00000267001	AC006538	ENST00000586572	GO:0005385(zinc ion transmembrane transporter activity);GO:0005886(plasma membrane);GO:0016020(membrane);GO:0016021(integral component of membrane);GO:0030001(metal ion transport);GO:0046873(metal ion transmembrane transporter activity);GO:0055085(transmembrane transport);GO:0071577(zinc ion transmembrane transport)	NA	novel protein	protein_coding	3.44215	2.76167	2.10239	0.742374	1.73569	0.688063	2.62345	1.39147	0.00764692	up	yes
ENSG00000139531	SUOX	ENST00000356124;ENST00000394115;ENST00000266971;ENST00000394109;ENST00000552813;ENST00000550121;ENST00000548274;ENST00000550478;ENST00000551698;ENST00000546833;ENST00000550065;ENST00000550340;ENST00000552258;ENST00000546712;ENST00000547586;ENST00000551841;ENST00000552363	GO:0005515(protein binding);GO:0005739(mitochondrion);GO:0005758(mitochondrial intermembrane space);GO:0005759(mitochondrial matrix);GO:0006790(sulfur compound metabolic process);GO:0008482(sulfite oxidase activity);GO:0016491(oxidoreductase activity);GO:0020037(heme binding);GO:0030151(molybdenum ion binding);GO:0042128(nitrate assimilation);GO:0043546(molybdopterin cofactor binding);GO:0046872(…	00920(Sulfur metabolism);00920(Sulfur metabolism)	sulfite oxidase [Source:HGNC Symbol;Acc:HGNC:11460]	protein_coding;retained_intron;processed_transcript;nonsense_mediated_decay	7.22627	2.55753	2.55728	2.16449	1.16714	1.46177	2.5746	1.36435	0.000587574	up	yes
ENSG00000285641	AL358472	ENST00000648869	NA	NA	novel protein	nonsense_mediated_decay	4.52552	6.12734	1.34148	1.41044	2.07321	1.27759	2.51916	1.33294	0.00615089	up	yes
ENSG00000167995	BEST1	ENST00000449131;ENST00000652345;ENST00000524877;ENST00000378043;ENST00000534553;ENST00000524926;ENST00000526988;ENST00000533521;ENST00000529265	GO:0005254(chloride channel activity);GO:0005829(cytosol);GO:0005886(plasma membrane);GO:0006811(ion transport);GO:0006821(chloride transport);GO:0007601(visual perception);GO:0016020(membrane);GO:0016021(integral component of membrane);GO:0016323(basolateral plasma membrane);GO:0030321(transepithelial chloride transport);GO:0034220(ion transmembrane transport);GO:0034707(chloride channel complex…	NA	bestrophin 1 [Source:HGNC Symbol;Acc:HGNC:12703]	protein_coding;retained_intron;nonsense_mediated_decay	1.24973	1.10088	0.980523	0.300842	0.740115	0.287053	2.50837	1.32675	0.00126009	up	yes
ENSG00000267426	AC087289	ENST00000593156;ENST00000590947;ENST00000587556	NA	NA	novel transcript	retained_intron;nonsense_mediated_decay	0.931598	0.229451	0.418676	0.256244	0.320114	0.0581485	2.48969	1.31597	0.038573	up	yes
ENSG00000138107	ACTR1A	ENST00000470322;ENST00000369905;ENST00000487599;ENST00000480947;ENST00000636707;ENST00000481044;ENST00000494549	GO:0000086(G2/M transition of mitotic cell cycle);GO:0000166(nucleotide binding);GO:0002177(manchette);GO:0005515(protein binding);GO:0005524(ATP binding);GO:0005737(cytoplasm);GO:0005813(centrosome);GO:0005814(centriole);GO:0005815(microtubule organizing center);GO:0005829(cytosol);GO:0005856(cytoskeleton);GO:0005869(dynactin complex);GO:0005875(microtubule associated complex);GO:0005938(cell co…	NA	ARP1 actin related protein 1 homolog A [Source:HGNC Symbol;Acc:HGNC:167]	processed_transcript;protein_coding;nonsense_mediated_decay	39.1417	41.8029	34.3302	16.2338	15.2575	15.5777	2.44906	1.29223	7.67962e-15	up	yes
ENSG00000178150	ZNF114	ENST00000315849;ENST00000601320;ENST00000595607;ENST00000600687;ENST00000594024;ENST00000598898;ENST00000595408	GO:0000981(DNA-binding transcription factor activity, RNA polymerase II-specific);GO:0003674(molecular_function);GO:0003676(nucleic acid binding);GO:0003677(DNA binding);GO:0005515(protein binding);GO:0005622(intracellular);GO:0005634(nucleus);GO:0006355(regulation of transcription, DNA-templated);GO:0006357(regulation of transcription by RNA polymerase II);GO:0008150(biological_process);GO:00428…	05168(Herpes simplex virus 1 infection);05168(Herpes simplex virus 1 infection)	zinc finger protein 114 [Source:HGNC Symbol;Acc:HGNC:12894]	protein_coding;retained_intron	0.655485	0.526269	0.145167	0.0869342	0.292414	0.164982	2.43771	1.28553	0.0438144	up	yes
ENSG00000274925	ZKSCAN2-DT	ENST00000612792	NA	NA	ZKSCAN2 divergent transcript [Source:HGNC Symbol;Acc:HGNC:53912]	lincRNA	0.338742	0.18943	0.312647	0.079164	0.169402	0.102349	2.39608	1.26067	0.0188379	up	yes
ENSG00000129159	KCNC1	ENST00000379472;ENST00000526029;ENST00000640318;ENST00000265969;ENST00000638366;ENST00000638395;ENST00000639495;ENST00000640153;ENST00000640909;ENST00000639325;ENST00000640461;ENST00000525802;ENST00000638825	GO:0005216(ion channel activity);GO:0005244(voltage-gated ion channel activity);GO:0005249(voltage-gated potassium channel activity);GO:0005251(delayed rectifier potassium channel activity);GO:0005267(potassium channel activity);GO:0005515(protein binding);GO:0005886(plasma membrane);GO:0006811(ion transport);GO:0006813(potassium ion transport);GO:0007420(brain development);GO:0008076(voltage-gat…	NA	potassium voltage-gated channel subfamily C member 1 [Source:HGNC Symbol;Acc:HGNC:6233]	protein_coding;retained_intron;nonsense_mediated_decay;processed_transcript	0.055866	0.0783504	0.0813135	0.0398554	0.0432566	0.00737109	2.38199	1.25217	0.0392667	up	yes
ENSG00000272196	HIST2H2AA4	ENST00000607355	GO:0000786(nucleosome);GO:0000790(nuclear chromatin);GO:0003674(molecular_function);GO:0003677(DNA binding);GO:0005634(nucleus);GO:0005694(chromosome);GO:0006325(chromatin organization);GO:0008150(biological_process);GO:0046982(protein heterodimerization activity);GO:0070062(extracellular exosome)	04217(Necroptosis);05034(Alcoholism);05322(Systemic lupus erythematosus)	histone cluster 2 H2A family member a4 [Source:HGNC Symbol;Acc:HGNC:29668]	protein_coding	4.56773	5.1908	4.44059	0.812018	2.27072	2.89187	2.37658	1.24889	0.0120058	up	yes
ENSG00000270011	ZNF559-ZNF177	ENST00000446085;ENST00000605301;ENST00000541595;ENST00000605093;ENST00000603656;ENST00000603099;ENST00000604886;ENST00000605775;ENST00000603974;ENST00000603024;ENST00000605006;ENST00000593242;ENST00000604543;ENST00000605071;ENST00000605471;ENST00000605522	GO:0003676(nucleic acid binding);GO:0005622(intracellular);GO:0006355(regulation of transcription, DNA-templated);GO:0006355(regulation of transcription, DNA-templated)	05168(Herpes simplex virus 1 infection);05168(Herpes simplex virus 1 infection)	ZNF559-ZNF177 readthrough [Source:HGNC Symbol;Acc:HGNC:42964]	protein_coding;processed_transcript;nonsense_mediated_decay	0.34928	0.119496	0.318389	0.119547	0.148005	0.0645257	2.37043	1.24515	0.0329127	up	yes
ENSG00000136944	LMX1B	ENST00000373474;ENST00000526117;ENST00000355497;ENST00000561065	GO:0000977(RNA polymerase II regulatory region sequence-specific DNA binding);GO:0000981(DNA-binding transcription factor activity, RNA polymerase II-specific);GO:0001701(in utero embryonic development);GO:0003677(DNA binding);GO:0003700(DNA-binding transcription factor activity);GO:0005515(protein binding);GO:0005634(nucleus);GO:0006355(regulation of transcription, DNA-templated);GO:0007275(mult…	NA	LIM homeobox transcription factor 1 beta [Source:HGNC Symbol;Acc:HGNC:6654]	protein_coding	2.01128	1.32168	0.846854	0.687591	0.571348	0.513695	2.35797	1.23754	0.00129983	up	yes
ENSG00000180537	RNF182	ENST00000488300;ENST00000537388;ENST00000423553;ENST00000471906;ENST00000420478;ENST00000544682;ENST00000488763;ENST00000537663	GO:0004842(ubiquitin-protein transferase activity);GO:0005515(protein binding);GO:0005737(cytoplasm);GO:0016020(membrane);GO:0016021(integral component of membrane);GO:0016567(protein ubiquitination);GO:0016740(transferase activity);GO:0046872(metal ion binding);GO:0046872(metal ion binding)	NA	ring finger protein 182 [Source:HGNC Symbol;Acc:HGNC:28522]	protein_coding	10.8803	4.30395	12.7195	4.67473	3.55777	3.65032	2.34824	1.23158	9.24593e-05	up	yes
ENSG00000171492	LRRC8D	ENST00000527156;ENST00000394593;ENST00000337338;ENST00000525774;ENST00000532201;ENST00000414841;ENST00000441269	GO:0005225(volume-sensitive anion channel activity);GO:0005515(protein binding);GO:0005623(cell);GO:0005737(cytoplasm);GO:0005783(endoplasmic reticulum);GO:0005789(endoplasmic reticulum membrane);GO:0005886(plasma membrane);GO:0005887(integral component of plasma membrane);GO:0006811(ion transport);GO:0006884(cell volume homeostasis);GO:0015698(inorganic anion transport);GO:0015734(taurine transp…	NA	leucine rich repeat containing 8 VRAC subunit D [Source:HGNC Symbol;Acc:HGNC:16992]	protein_coding	6.67265	1.05002	1.37652	1.56565	1.20954	1.18202	2.29939	1.20125	0.0256868	up	yes
ENSG00000257605	AC073611	ENST00000550263	NA	NA	novel transcript, antisense to PFDN5 and C12orf10	antisense	2.12834	1.42462	1.66304	1.11147	0.638634	0.528583	2.28903	1.19474	0.0208918	up	yes
ENSG00000167528	ZNF641	ENST00000544117;ENST00000547026;ENST00000548932;ENST00000546874;ENST00000550342;ENST00000549125;ENST00000448928;ENST00000301042;ENST00000549512;ENST00000550181	GO:0000981(DNA-binding transcription factor activity, RNA polymerase II-specific);GO:0003676(nucleic acid binding);GO:0003677(DNA binding);GO:0005622(intracellular);GO:0005634(nucleus);GO:0005654(nucleoplasm);GO:0005829(cytosol);GO:0006355(regulation of transcription, DNA-templated);GO:0006357(regulation of transcription by RNA polymerase II);GO:0046872(metal ion binding);GO:0046872(metal ion bin…	05168(Herpes simplex virus 1 infection);05168(Herpes simplex virus 1 infection)	zinc finger protein 641 [Source:HGNC Symbol;Acc:HGNC:31834]	protein_coding;retained_intron	2.21293	2.40624	2.66888	0.439586	2.19436	0.561354	2.28087	1.18958	0.0114563	up	yes
ENSG00000197558	SSPO	ENST00000465639;ENST00000488835;ENST00000472850;ENST00000493502;ENST00000475488;ENST00000486824;ENST00000461331;ENST00000623373;ENST00000481772;ENST00000378016;ENST00000492965	GO:0005515(protein binding);GO:0005576(extracellular region);GO:0005615(extracellular space);GO:0007155(cell adhesion);GO:0007399(nervous system development);GO:0010466(negative regulation of peptidase activity);GO:0030154(cell differentiation);GO:0030414(peptidase inhibitor activity);GO:0030414(peptidase inhibitor activity)	NA	SCO-spondin [Source:HGNC Symbol;Acc:HGNC:21998]	retained_intron;processed_transcript;protein_coding	0.0419349	0.0272812	0.0469157	0.00835817	0.0216042	0.0213611	2.26274	1.17807	0.0271187	up	yes
ENSG00000266094	RASSF5	ENST00000579942;ENST00000577571;ENST00000605653;ENST00000636182;ENST00000581503;ENST00000581888;ENST00000580449;ENST00000605120;ENST00000579436	GO:0005515(protein binding);GO:0005634(nucleus);GO:0005737(cytoplasm);GO:0005856(cytoskeleton);GO:0005874(microtubule);GO:0006915(apoptotic process);GO:0007165(signal transduction);GO:0008285(negative regulation of cell population proliferation);GO:0017016(Ras GTPase binding);GO:0031398(positive regulation of protein ubiquitination);GO:0035556(intracellular signal transduction);GO:0042981(regulat…	04014(Ras signaling pathway);04015(Rap1 signaling pathway);04218(Cellular senescence);04670(Leukocyte transendothelial migration);05200(Pathways in cancer);05223(Non-small cell lung cancer);05223(Non-small cell lung cancer)	Ras association domain family member 5 [Source:HGNC Symbol;Acc:HGNC:17609]	retained_intron;protein_coding	0.508156	0.462711	0.659852	0.276266	0.157526	0.297129	2.23105	1.15772	0.00459711	up	yes
ENSG00000135835	KIAA1614	ENST00000367588;ENST00000367587;ENST00000461346;ENST00000483705;ENST00000496210	GO:0005515(protein binding);GO:0005515(protein binding)	NA	KIAA1614 [Source:HGNC Symbol;Acc:HGNC:29327]	protein_coding;processed_transcript	0.254988	0.233396	0.175379	0.0650097	0.140812	0.0980212	2.18456	1.12734	0.0133844	up	yes
ENSG00000263513	FAM72C	ENST00000584486;ENST00000369175	GO:0005829(cytosol);GO:0016020(membrane);GO:0043231(intracellular membrane-bounded organelle);GO:0043231(intracellular membrane-bounded organelle)	NA	family with sequence similarity 72 member C [Source:HGNC Symbol;Acc:HGNC:30602]	protein_coding	2.16407	3.11495	4.42746	1.20301	1.60026	1.70009	2.15538	1.10795	0.00266875	up	yes
ENSG00000244242	IFITM10	ENST00000340134;ENST00000482459;ENST00000382123;ENST00000486852	GO:0005886(plasma membrane);GO:0016020(membrane);GO:0016021(integral component of membrane);GO:0016021(integral component of membrane)	NA	interferon induced transmembrane protein 10 [Source:HGNC Symbol;Acc:HGNC:40022]	protein_coding;processed_transcript;nonsense_mediated_decay;retained_intron	1.03073	0.809595	0.946036	0.36911	0.432702	0.492827	2.15223	1.10584	0.00240839	up	yes
ENSG00000118804	STBD1	ENST00000237642	GO:0005515(protein binding);GO:0005783(endoplasmic reticulum);GO:0005789(endoplasmic reticulum membrane);GO:0005829(cytosol);GO:0005886(plasma membrane);GO:0005887(integral component of plasma membrane);GO:0005975(carbohydrate metabolic process);GO:0005977(glycogen metabolic process);GO:0005980(glycogen catabolic process);GO:0006914(autophagy);GO:0016020(membrane);GO:0016021(integral component of…	NA	starch binding domain 1 [Source:HGNC Symbol;Acc:HGNC:24854]	protein_coding	8.03077	5.89508	7.48433	1.80373	6.41401	1.75395	2.1471	1.10239	0.00884754	up	yes
ENSG00000138622	HCN4	ENST00000261917	GO:0000166(nucleotide binding);GO:0002027(regulation of heart rate);GO:0003254(regulation of membrane depolarization);GO:0005216(ion channel activity);GO:0005222(intracellular cAMP-activated cation channel activity);GO:0005244(voltage-gated ion channel activity);GO:0005248(voltage-gated sodium channel activity);GO:0005249(voltage-gated potassium channel activity);GO:0005267(potassium channel acti…	04024(cAMP signaling pathway);04742(Taste transduction)	hyperpolarization activated cyclic nucleotide gated potassium channel 4 [Source:HGNC Symbol;Acc:HGNC:16882]	protein_coding	0.245917	0.290829	0.284468	0.133956	0.152	0.099793	2.12888	1.0901	0.0113806	up	yes
ENSG00000105879	CBLL1	ENST00000440859;ENST00000222597;ENST00000432748;ENST00000415884;ENST00000493361;ENST00000479443;ENST00000420796;ENST00000487517	GO:0000151(ubiquitin ligase complex);GO:0004842(ubiquitin-protein transferase activity);GO:0005515(protein binding);GO:0005634(nucleus);GO:0005654(nucleoplasm);GO:0005737(cytoplasm);GO:0005829(cytosol);GO:0007162(negative regulation of cell adhesion);GO:0007275(multicellular organism development);GO:0016567(protein ubiquitination);GO:0016607(nuclear speck);GO:0016740(transferase activity);GO:0030…	NA	Cbl proto-oncogene like 1 [Source:HGNC Symbol;Acc:HGNC:21225]	protein_coding;nonsense_mediated_decay;retained_intron	1.96437	3.95043	1.98179	2.06728	0.928225	0.76668	2.09894	1.06966	0.00893511	up	yes
ENSG00000108946	PRKAR1A	ENST00000586397;ENST00000358598;ENST00000536854;ENST00000588188;ENST00000585460;ENST00000589228;ENST00000585815;ENST00000589017;ENST00000392711;ENST00000585427;ENST00000588178;ENST00000585907;ENST00000589480;ENST00000588702;ENST00000589309;ENST00000585981;ENST00000586541;ENST00000592194;ENST00000392710;ENST00000585608;ENST00000592800	GO:0000166(nucleotide binding);GO:0001707(mesoderm formation);GO:0001772(immunological synapse);GO:0001932(regulation of protein phosphorylation);GO:0003091(renal water homeostasis);GO:0004862(cAMP-dependent protein kinase inhibitor activity);GO:0005515(protein binding);GO:0005737(cytoplasm);GO:0005829(cytosol);GO:0005886(plasma membrane);GO:0005930(axoneme);GO:0005952(cAMP-dependent protein kina…	04910(Insulin signaling pathway);04910(Insulin signaling pathway)	protein kinase cAMP-dependent type I regulatory subunit alpha [Source:HGNC Symbol;Acc:HGNC:9388]	protein_coding;retained_intron;nonsense_mediated_decay	14.8764	11.6387	18.3885	7.21578	7.39519	6.93552	2.08403	1.05938	6.09199e-09	up	yes
ENSG00000261553	AL137782	ENST00000563635;ENST00000570285	NA	NA	novel transcript	processed_transcript	1.67681	2.07918	1.97917	0.546556	0.8992	1.31799	2.07514	1.05321	0.00516698	up	yes
ENSG00000116667	C1orf21	ENST00000235307;ENST00000477517;ENST00000648109;ENST00000367514;ENST00000489143	GO:0005515(protein binding);GO:0005515(protein binding)	NA	chromosome 1 open reading frame 21 [Source:HGNC Symbol;Acc:HGNC:15494]	protein_coding;processed_transcript;nonsense_mediated_decay	0.0837256	0.0878965	0.0756495	0.0513513	0.0216628	0.0465735	2.0677	1.04803	0.039907	up	yes
ENSG00000128274	A4GALT	ENST00000381278;ENST00000642412;ENST00000249005;ENST00000401850;ENST00000647439;ENST00000465765;ENST00000483026	GO:0000139(Golgi membrane);GO:0001576(globoside biosynthetic process);GO:0005794(Golgi apparatus);GO:0006486(protein glycosylation);GO:0006629(lipid metabolic process);GO:0006688(glycosphingolipid biosynthetic process);GO:0007009(plasma membrane organization);GO:0008378(galactosyltransferase activity);GO:0015643(toxic substance binding);GO:0016020(membrane);GO:0016021(integral component of membra…	00601(Glycosphingolipid biosynthesis - lacto and neolacto series);00603(Glycosphingolipid biosynthesis - globo and isoglobo series);00603(Glycosphingolipid biosynthesis - globo and isoglobo series)	alpha 1,4-galactosyltransferase (P blood group) [Source:HGNC Symbol;Acc:HGNC:18149]	protein_coding;processed_transcript	5.04504	6.08362	4.46873	3.78188	1.53877	2.28857	2.0498	1.03548	0.00204273	up	yes
ENSG00000270885	RASL10B	ENST00000603017;ENST00000603498	GO:0000166(nucleotide binding);GO:0003050(regulation of systemic arterial blood pressure by atrial natriuretic peptide);GO:0003924(GTPase activity);GO:0005525(GTP binding);GO:0005886(plasma membrane);GO:0007165(signal transduction);GO:0016020(membrane);GO:0090277(positive regulation of peptide hormone secretion);GO:0090277(positive regulation of peptide hormone secretion)	NA	RAS like family 10 member B [Source:HGNC Symbol;Acc:HGNC:30295]	protein_coding;processed_transcript	0.8132	0.588243	0.347799	0.194087	0.300149	0.359707	2.04843	1.03452	0.0304805	up	yes
ENSG00000104888	SLC17A7	ENST00000221485;ENST00000598018;ENST00000600672;ENST00000596689;ENST00000600601	GO:0003407(neural retina development);GO:0005313(L-glutamate transmembrane transporter activity);GO:0005315(inorganic phosphate transmembrane transporter activity);GO:0005326(neurotransmitter transporter activity);GO:0005886(plasma membrane);GO:0006811(ion transport);GO:0006814(sodium ion transport);GO:0006817(phosphate ion transport);GO:0006836(neurotransmitter transport);GO:0007268(chemical syn…	04721(Synaptic vesicle cycle);04723(Retrograde endocannabinoid signaling);04724(Glutamatergic synapse);05033(Nicotine addiction);05033(Nicotine addiction)	solute carrier family 17 member 7 [Source:HGNC Symbol;Acc:HGNC:16704]	protein_coding;retained_intron;nonsense_mediated_decay	0.781162	1.0115	0.716559	0.381354	0.329033	0.514908	2.04785	1.03411	0.0051144	up	yes
ENSG00000072195	SPEG	ENST00000312358;ENST00000431523;ENST00000464989;ENST00000435853;ENST00000403148;ENST00000451076;ENST00000463218;ENST00000396686;ENST00000498378;ENST00000497065;ENST00000452101;ENST00000420132;ENST00000491248;ENST00000409595;ENST00000396698;ENST00000485069;ENST00000475921;ENST00000396689;ENST00000462545;ENST00000396688;ENST00000485813;ENST00000496786	GO:0000166(nucleotide binding);GO:0004672(protein kinase activity);GO:0004674(protein serine/threonine kinase activity);GO:0005515(protein binding);GO:0005524(ATP binding);GO:0005634(nucleus);GO:0006468(protein phosphorylation);GO:0007517(muscle organ development);GO:0008285(negative regulation of cell population proliferation);GO:0016301(kinase activity);GO:0016310(phosphorylation);GO:0016740(tr…	NA	striated muscle enriched protein kinase [Source:HGNC Symbol;Acc:HGNC:16901]	protein_coding;retained_intron;nonsense_mediated_decay;processed_transcript	0.100369	0.154834	0.0909605	0.0509182	0.0663168	0.0522151	2.04286	1.03059	0.0202806	up	yes
ENSG00000197965	MPZL1	ENST00000392121;ENST00000465787;ENST00000367853;ENST00000474729;ENST00000359523;ENST00000403379;ENST00000464954;ENST00000474859;ENST00000448405;ENST00000487858;ENST00000498279	GO:0005198(structural molecule activity);GO:0005515(protein binding);GO:0005887(integral component of plasma membrane);GO:0005925(focal adhesion);GO:0007165(signal transduction);GO:0007169(transmembrane receptor protein tyrosine kinase signaling pathway);GO:0007267(cell-cell signaling);GO:0009986(cell surface);GO:0016020(membrane);GO:0016021(integral component of membrane);GO:0016021(integral com…	04514(Cell adhesion molecules (CAMs));04514(Cell adhesion molecules (CAMs))	myelin protein zero like 1 [Source:HGNC Symbol;Acc:HGNC:7226]	protein_coding;retained_intron;processed_transcript;nonsense_mediated_decay	5.62205	11.6034	5.11481	3.29267	4.49299	3.15314	2.0423	1.03019	0.000518975	up	yes
ENSG00000126500	FLRT1	ENST00000246841	GO:0005104(fibroblast growth factor receptor binding);GO:0005515(protein binding);GO:0005576(extracellular region);GO:0005615(extracellular space);GO:0005737(cytoplasm);GO:0005783(endoplasmic reticulum);GO:0005789(endoplasmic reticulum membrane);GO:0005886(plasma membrane);GO:0005887(integral component of plasma membrane);GO:0005911(cell-cell junction);GO:0005925(focal adhesion);GO:0007155(cell a…	NA	fibronectin leucine rich transmembrane protein 1 [Source:HGNC Symbol;Acc:HGNC:3760]	protein_coding	0.217922	0.343595	0.30309	0.119093	0.150746	0.153546	2.04213	1.03007	0.0298878	up	yes
ENSG00000168874	ATOH8	ENST00000306279;ENST00000463422;ENST00000469442;ENST00000489682;ENST00000473116	GO:0000981(DNA-binding transcription factor activity, RNA polymerase II-specific);GO:0001704(formation of primary germ layer);GO:0001937(negative regulation of endothelial cell proliferation);GO:0003677(DNA binding);GO:0003700(DNA-binding transcription factor activity);GO:0005634(nucleus);GO:0005654(nucleoplasm);GO:0005737(cytoplasm);GO:0006355(regulation of transcription, DNA-templated);GO:00072…	NA	atonal bHLH transcription factor 8 [Source:HGNC Symbol;Acc:HGNC:24126]	protein_coding;processed_transcript	0.237697	0.366296	0.230868	0.0679004	0.146451	0.199108	2.01921	1.01379	0.0343117	up	yes
ENSG00000204920	ZNF155	ENST00000407951;ENST00000270014;ENST00000590615;ENST00000591532;ENST00000588531;ENST00000586454;ENST00000587302;ENST00000590411;ENST00000611002	GO:0000981(DNA-binding transcription factor activity, RNA polymerase II-specific);GO:0003676(nucleic acid binding);GO:0003677(DNA binding);GO:0003700(DNA-binding transcription factor activity);GO:0005622(intracellular);GO:0005634(nucleus);GO:0006355(regulation of transcription, DNA-templated);GO:0006357(regulation of transcription by RNA polymerase II);GO:0046872(metal ion binding);GO:0046872(met…	05168(Herpes simplex virus 1 infection);05168(Herpes simplex virus 1 infection)	zinc finger protein 155 [Source:HGNC Symbol;Acc:HGNC:12940]	protein_coding;retained_intron	2.39687	1.7427	3.2404	0.989483	1.39756	1.26917	2.01847	1.01326	0.00415883	up	yes
ENSG00000142494	SLC47A1	ENST00000270570;ENST00000575362;ENST00000495425;ENST00000571335;ENST00000584348;ENST00000497548;ENST00000581558;ENST00000436810;ENST00000576095;ENST00000575023;ENST00000573009;ENST00000395585;ENST00000575377;ENST00000574596	GO:0005886(plasma membrane);GO:0006812(cation transport);GO:0006855(drug transmembrane transport);GO:0015238(drug transmembrane transporter activity);GO:0015297(antiporter activity);GO:0015695(organic cation transport);GO:0015893(drug transport);GO:0016020(membrane);GO:0016021(integral component of membrane);GO:0031982(vesicle);GO:0055085(transmembrane transport);GO:0055085(transmembrane transpor…	NA	solute carrier family 47 member 1 [Source:HGNC Symbol;Acc:HGNC:25588]	protein_coding;processed_transcript;retained_intron	4.28621	3.96523	6.19579	2.23881	2.51827	2.40858	2.01617	1.01162	3.06074e-05	up	yes
ENSG00000228716	DHFR	ENST00000439211;ENST00000505337;ENST00000511032;ENST00000513048;ENST00000513314;ENST00000504396;ENST00000508282	GO:0000083(regulation of transcription involved in G1/S transition of mitotic cell cycle);GO:0000900(translation repressor activity, mRNA regulatory element binding);GO:0003723(RNA binding);GO:0003729(mRNA binding);GO:0004146(dihydrofolate reductase activity);GO:0005515(protein binding);GO:0005542(folic acid binding);GO:0005737(cytoplasm);GO:0005739(mitochondrion);GO:0005829(cytosol);GO:0006729(t…	00670(One carbon pool by folate);00790(Folate biosynthesis);01523(Antifolate resistance);01523(Antifolate resistance)	dihydrofolate reductase [Source:HGNC Symbol;Acc:HGNC:2861]	protein_coding;processed_transcript;retained_intron	21.2883	14.7157	19.2626	8.72455	9.35122	9.41633	2.01027	1.00739	2.38686e-08	up	yes
ENSG00000121068	TBX2	ENST00000477081;ENST00000240328;ENST00000419047;ENST00000586986	GO:0000122(negative regulation of transcription by RNA polymerase II);GO:0000978(RNA polymerase II proximal promoter sequence-specific DNA binding);GO:0000981(DNA-binding transcription factor activity, RNA polymerase II-specific);GO:0001227(DNA-binding transcription repressor activity, RNA polymerase II-specific);GO:0001947(heart looping);GO:0003007(heart morphogenesis);GO:0003148(outflow tract s…	NA	T-box 2 [Source:HGNC Symbol;Acc:HGNC:11597]	retained_intron;protein_coding;nonsense_mediated_decay;processed_transcript	0.52825	0.796771	0.544559	0.320485	0.356888	0.254775	2.00567	1.00408	0.00981242	up	yes
ENSG00000162772	ATF3	ENST00000341491;ENST00000366983;ENST00000465155;ENST00000366981;ENST00000613954;ENST00000336937;ENST00000492118;ENST00000366985;ENST00000366987;ENST00000464547;ENST00000613104	GO:0000122(negative regulation of transcription by RNA polymerase II);GO:0000976(transcription regulatory region sequence-specific DNA binding);GO:0000977(RNA polymerase II regulatory region sequence-specific DNA binding);GO:0000978(RNA polymerase II proximal promoter sequence-specific DNA binding);GO:0000981(DNA-binding transcription factor activity, RNA polymerase II-specific);GO:0001227(DNA-bi…	NA	activating transcription factor 3 [Source:HGNC Symbol;Acc:HGNC:785]	protein_coding;retained_intron;processed_transcript;nonsense_mediated_decay	7.30468	5.57464	12.6824	3.38334	4.55472	4.80948	2.00523	1.00377	0.000372161	up	yes
ENSG00000196136	SERPINA3	ENST00000467132;ENST00000393078;ENST00000482740;ENST00000556968;ENST00000621603;ENST00000485588;ENST00000393080;ENST00000556388;ENST00000555820	GO:0002576(platelet degranulation);GO:0003677(DNA binding);GO:0004867(serine-type endopeptidase inhibitor activity);GO:0005515(protein binding);GO:0005576(extracellular region);GO:0005615(extracellular space);GO:0005634(nucleus);GO:0006953(acute-phase response);GO:0006954(inflammatory response);GO:0010466(negative regulation of peptidase activity);GO:0010951(negative regulation of endopeptidase a…	NA	serpin family A member 3 [Source:HGNC Symbol;Acc:HGNC:16]	protein_coding;nonsense_mediated_decay;processed_transcript	0.642541	0.673983	0.366596	1.02199	1.02027	1.29193	0.504805	-0.986203	0.0157882	down	no
ENSG00000111711	GOLT1B	ENST00000229314;ENST00000542194;ENST00000539025;ENST00000545113;ENST00000535593;ENST00000542038;ENST00000539663;ENST00000545093;ENST00000540141;ENST00000631252	GO:0000139(Golgi membrane);GO:0005783(endoplasmic reticulum);GO:0005794(Golgi apparatus);GO:0015031(protein transport);GO:0016020(membrane);GO:0016021(integral component of membrane);GO:0016192(vesicle-mediated transport);GO:0032991(protein-containing complex);GO:0043123(positive regulation of I-kappaB kinase/NF-kappaB signaling);GO:0043123(positive regulation of I-kappaB kinase/NF-kappaB signali…	NA	golgi transport 1B [Source:HGNC Symbol;Acc:HGNC:20175]	protein_coding;nonsense_mediated_decay;retained_intron;processed_transcript	3.27017	9.06252	3.76772	4.73711	10.3139	16.844	0.504793	-0.986236	0.0338836	down	no
ENSG00000280987	MATR3	ENST00000361059;ENST00000394800;ENST00000509644;ENST00000512107;ENST00000504203;ENST00000509990;ENST00000506147;ENST00000505016;ENST00000502394;ENST00000514694;ENST00000502929	GO:0003676(nucleic acid binding);GO:0003723(RNA binding);GO:0005634(nucleus);GO:0008270(zinc ion binding);GO:0008270(zinc ion binding)	NA	matrin 3 [Source:NCBI gene;Acc:9782]	protein_coding	8.53926	5.48925	11.1667	22.9902	17.0565	9.99344	0.5035	-0.989937	0.000674109	down	no
ENSG00000080345	RIF1	ENST00000243326;ENST00000453091;ENST00000484077;ENST00000430328;ENST00000494333;ENST00000454583;ENST00000467762;ENST00000414861;ENST00000457745;ENST00000444746;ENST00000428287;ENST00000498041	GO:0000122(negative regulation of transcription by RNA polymerase II);GO:0000723(telomere maintenance);GO:0000781(chromosome, telomeric region);GO:0000790(nuclear chromatin);GO:0000793(condensed chromosome);GO:0001939(female pronucleus);GO:0001940(male pronucleus);GO:0005515(protein binding);GO:0005634(nucleus);GO:0005654(nucleoplasm);GO:0005694(chromosome);GO:0005737(cytoplasm);GO:0005819(spindl…	04550(Signaling pathways regulating pluripotency of stem cells);04550(Signaling pathways regulating pluripotency of stem cells)	replication timing regulatory factor 1 [Source:HGNC Symbol;Acc:HGNC:23207]	protein_coding;processed_transcript;nonsense_mediated_decay	0.819463	0.274924	0.973119	1.4433	0.991474	1.67348	0.503256	-0.990634	0.00893307	down	no
ENSG00000023445	BIRC3	ENST00000263464;ENST00000615299;ENST00000528940;ENST00000527309;ENST00000532808;ENST00000527336;ENST00000526421	GO:0002756(MyD88-independent toll-like receptor signaling pathway);GO:0004842(ubiquitin-protein transferase activity);GO:0005515(protein binding);GO:0005634(nucleus);GO:0005654(nucleoplasm);GO:0005737(cytoplasm);GO:0005829(cytosol);GO:0006915(apoptotic process);GO:0007166(cell surface receptor signaling pathway);GO:0007249(I-kappaB kinase/NF-kappaB signaling);GO:0007283(spermatogenesis);GO:001080…	01524(Platinum drug resistance);04064(NF-kappa B signaling pathway);04120(Ubiquitin mediated proteolysis);04210(Apoptosis);04215(Apoptosis - multiple species);04217(Necroptosis);04510(Focal adhesion);04621(NOD-like receptor signaling pathway);04668(TNF signaling pathway);05145(Toxoplasmosis);05168(Herpes simplex virus 1 infection);05200(Pathways in cancer);05202(Transcriptional misregulation in c…	baculoviral IAP repeat containing 3 [Source:HGNC Symbol;Acc:HGNC:591]	protein_coding;processed_transcript;retained_intron	2.73795	1.47552	3.68827	6.11402	4.9235	4.69775	0.502167	-0.99376	0.000512281	down	no
ENSG00000117724	CENPF	ENST00000366955;ENST00000469862;ENST00000464322;ENST00000614578;ENST00000495259;ENST00000467765	GO:0000278(mitotic cell cycle);GO:0000775(chromosome, centromeric region);GO:0000776(kinetochore);GO:0000777(condensed chromosome kinetochore);GO:0000785(chromatin);GO:0000922(spindle pole);GO:0000940(condensed chromosome outer kinetochore);GO:0001822(kidney development);GO:0003682(chromatin binding);GO:0005515(protein binding);GO:0005634(nucleus);GO:0005635(nuclear envelope);GO:0005654(nucleopla…	NA	centromere protein F [Source:HGNC Symbol;Acc:HGNC:1857]	protein_coding;processed_transcript	5.40985	2.01182	7.32869	9.48683	8.88926	11.1641	0.499332	-1.00193	0.0018117	down	yes
ENSG00000250151	ARPC4-TTLL3	ENST00000424442;ENST00000453882;ENST00000418163;ENST00000397256	GO:0003779(actin binding);GO:0005737(cytoplasm);GO:0005856(cytoskeleton);GO:0005885(Arp2/3 protein complex);GO:0006464(cellular protein modification process);GO:0015629(actin cytoskeleton);GO:0018094(protein polyglycylation);GO:0030041(actin filament polymerization);GO:0030833(regulation of actin filament polymerization);GO:0034314(Arp2/3 complex-mediated actin nucleation);GO:0070735(protein-glyc…	NA	ARPC4-TTLL3 readthrough [Source:HGNC Symbol;Acc:HGNC:38830]	nonsense_mediated_decay;protein_coding	0.699885	0.765396	0.776596	2.13761	1.08632	1.26667	0.499238	-1.0022	0.017886	down	yes
ENSG00000174799	CEP135	ENST00000506202;ENST00000257287;ENST00000422247;ENST00000515081;ENST00000506809	GO:0000086(G2/M transition of mitotic cell cycle);GO:0005515(protein binding);GO:0005737(cytoplasm);GO:0005813(centrosome);GO:0005814(centriole);GO:0005829(cytosol);GO:0005856(cytoskeleton);GO:0007099(centriole replication);GO:0008022(protein C-terminus binding);GO:0010389(regulation of G2/M transition of mitotic cell cycle);GO:0010457(centriole-centriole cohesion);GO:0097711(ciliary basal body-p…	NA	centrosomal protein 135 [Source:HGNC Symbol;Acc:HGNC:29086]	retained_intron;protein_coding	0.380036	0.162904	0.463835	0.567523	0.60191	0.857921	0.496596	-1.00986	0.0181597	down	yes
ENSG00000163739	CXCL1	ENST00000395761;ENST00000509101	GO:0005102(signaling receptor binding);GO:0005125(cytokine activity);GO:0005576(extracellular region);GO:0005615(extracellular space);GO:0006935(chemotaxis);GO:0006952(defense response);GO:0006954(inflammatory response);GO:0006955(immune response);GO:0007165(signal transduction);GO:0007186(G protein-coupled receptor signaling pathway);GO:0007399(nervous system development);GO:0008009(chemokine ac…	04060(Cytokine-cytokine receptor interaction);04062(Chemokine signaling pathway);04621(NOD-like receptor signaling pathway);04657(IL-17 signaling pathway);04668(TNF signaling pathway);05120(Epithelial cell signaling in Helicobacter pylori infection);05132(Salmonella infection);05134(Legionellosis);05146(Amoebiasis);05167(Kaposi sarcoma-associated herpesvirus infection);05323(Rheumatoid arthritis)…	C-X-C motif chemokine ligand 1 [Source:HGNC Symbol;Acc:HGNC:4602]	protein_coding;processed_transcript	1.34096	1.13678	2.11671	3.39994	3.3794	2.53866	0.493073	-1.02013	0.0132952	down	yes
ENSG00000174130	TLR6	ENST00000436693;ENST00000381950;ENST00000514655;ENST00000610323;ENST00000508254	GO:0001540(amyloid-beta binding);GO:0001774(microglial cell activation);GO:0001775(cell activation);GO:0002224(toll-like receptor signaling pathway);GO:0002376(immune system process);GO:0002755(MyD88-dependent toll-like receptor signaling pathway);GO:0004888(transmembrane signaling receptor activity);GO:0005102(signaling receptor binding);GO:0005515(protein binding);GO:0005623(cell);GO:0005794(Go…	04145(Phagosome);04620(Toll-like receptor signaling pathway);05142(Chagas disease (American trypanosomiasis));05152(Tuberculosis);05152(Tuberculosis)	toll like receptor 6 [Source:HGNC Symbol;Acc:HGNC:16711]	protein_coding	1.70905	1.29176	1.65601	2.91941	3.30719	3.25372	0.491209	-1.02559	0.000162027	down	yes
ENSG00000137831	UACA	ENST00000379983;ENST00000558758;ENST00000322954;ENST00000560951;ENST00000560441;ENST00000539319;ENST00000560831;ENST00000559206;ENST00000558308;ENST00000559290;ENST00000560523;ENST00000560167;ENST00000559156;ENST00000559183	GO:0003674(molecular_function);GO:0005515(protein binding);GO:0005576(extracellular region);GO:0005634(nucleus);GO:0005737(cytoplasm);GO:0005829(cytosol);GO:0005856(cytoskeleton);GO:0008150(biological_process);GO:0070062(extracellular exosome);GO:0097190(apoptotic signaling pathway);GO:1901222(regulation of NIK/NF-kappaB signaling);GO:1901222(regulation of NIK/NF-kappaB signaling)	NA	uveal autoantigen with coiled-coil domains and ankyrin repeats [Source:HGNC Symbol;Acc:HGNC:15947]	protein_coding;retained_intron;processed_transcript	2.54327	1.10571	3.98734	5.54729	4.55593	5.50415	0.489276	-1.03128	0.0019084	down	yes
ENSG00000168079	SCARA5	ENST00000354914;ENST00000518030;ENST00000380385;ENST00000524352	GO:0005044(scavenger receptor activity);GO:0005886(plasma membrane);GO:0005887(integral component of plasma membrane);GO:0006811(ion transport);GO:0006879(cellular iron ion homeostasis);GO:0006897(endocytosis);GO:0006898(receptor-mediated endocytosis);GO:0009986(cell surface);GO:0016020(membrane);GO:0016021(integral component of membrane);GO:0034605(cellular response to heat);GO:0034755(iron ion …	NA	scavenger receptor class A member 5 [Source:HGNC Symbol;Acc:HGNC:28701]	protein_coding	0.243203	0.2104	0.351642	0.798738	0.54261	0.305224	0.489044	-1.03197	0.0407945	down	yes
ENSG00000138778	CENPE	ENST00000265148;ENST00000380026;ENST00000509823;ENST00000515478;ENST00000514974;ENST00000611174;ENST00000503705;ENST00000509120	GO:0000166(nucleotide binding);GO:0000278(mitotic cell cycle);GO:0000775(chromosome, centromeric region);GO:0000776(kinetochore);GO:0000777(condensed chromosome kinetochore);GO:0000779(condensed chromosome, centromeric region);GO:0003774(motor activity);GO:0003777(microtubule motor activity);GO:0005515(protein binding);GO:0005524(ATP binding);GO:0005634(nucleus);GO:0005654(nucleoplasm);GO:0005694…	NA	centromere protein E [Source:HGNC Symbol;Acc:HGNC:1856]	protein_coding;retained_intron;processed_transcript	0.666742	0.215902	0.731585	0.978211	1.08003	1.26417	0.48586	-1.04139	0.0135223	down	yes
ENSG00000210049	MT-TF	ENST00000387314	NA	NA	mitochondrially encoded tRNA-Phe (UUU/C) [Source:HGNC Symbol;Acc:HGNC:7481]	Mt_tRNA	20.1689	30.962	29.8986	53.3454	71.9741	41.4696	0.48582	-1.04151	0.0151021	down	yes
ENSG00000281207	SLFNL1-AS1	ENST00000626479	NA	NA	SLFNL1 antisense RNA 1 [Source:HGNC Symbol;Acc:HGNC:44126]	antisense	0.174739	0.238421	0.212796	0.367419	0.445737	0.476689	0.485296	-1.04306	0.0221427	down	yes
ENSG00000181827	RFX7	ENST00000559447;ENST00000559847;ENST00000560792	GO:0000978(RNA polymerase II proximal promoter sequence-specific DNA binding);GO:0000981(DNA-binding transcription factor activity, RNA polymerase II-specific);GO:0003677(DNA binding);GO:0003700(DNA-binding transcription factor activity);GO:0005634(nucleus);GO:0006355(regulation of transcription, DNA-templated);GO:0006357(regulation of transcription by RNA polymerase II);GO:0006357(regulation of …	NA	regulatory factor X7 [Source:HGNC Symbol;Acc:HGNC:25777]	protein_coding;nonsense_mediated_decay	0.779289	1.54182	0.829702	1.6153	2.38026	2.5137	0.484051	-1.04677	0.00251748	down	yes
ENSG00000144366	GULP1	ENST00000451191;ENST00000359135;ENST00000409830;ENST00000409637;ENST00000479019;ENST00000409580;ENST00000476422;ENST00000433052;ENST00000486445;ENST00000467422;ENST00000410051;ENST00000496976;ENST00000409927;ENST00000409843;ENST00000409609;ENST00000495745;ENST00000409805;ENST00000478306	GO:0005515(protein binding);GO:0005737(cytoplasm);GO:0006869(lipid transport);GO:0006909(phagocytosis);GO:0006911(phagocytosis, engulfment);GO:0006915(apoptotic process);GO:0006915(apoptotic process)	NA	GULP PTB domain containing engulfment adaptor 1 [Source:HGNC Symbol;Acc:HGNC:18649]	protein_coding;processed_transcript;retained_intron	0.701454	0.476289	1.37674	1.68074	1.6573	1.94864	0.483192	-1.04933	0.00273291	down	yes
ENSG00000118193	KIF14	ENST00000614960;ENST00000367350	GO:0000166(nucleotide binding);GO:0001558(regulation of cell growth);GO:0003777(microtubule motor activity);GO:0005515(protein binding);GO:0005524(ATP binding);GO:0005634(nucleus);GO:0005737(cytoplasm);GO:0005819(spindle);GO:0005829(cytosol);GO:0005856(cytoskeleton);GO:0005871(kinesin complex);GO:0005874(microtubule);GO:0005886(plasma membrane);GO:0007018(microtubule-based movement);GO:0007080(mi…	NA	kinesin family member 14 [Source:HGNC Symbol;Acc:HGNC:19181]	protein_coding	1.38191	0.600433	1.95731	2.66211	2.26829	3.22462	0.483095	-1.04962	0.00415685	down	yes
ENSG00000111348	ARHGDIB	ENST00000228945;ENST00000539131;ENST00000541546;ENST00000541644;ENST00000545895;ENST00000535676;ENST00000541380;ENST00000536592;ENST00000542276	GO:0003924(GTPase activity);GO:0005094(Rho GDP-dissociation inhibitor activity);GO:0005096(GTPase activator activity);GO:0005515(protein binding);GO:0005737(cytoplasm);GO:0005829(cytosol);GO:0005856(cytoskeleton);GO:0007162(negative regulation of cell adhesion);GO:0007266(Rho protein signal transduction);GO:0007275(multicellular organism development);GO:0016020(membrane);GO:0031410(cytoplasmic ve…	04722(Neurotrophin signaling pathway);04962(Vasopressin-regulated water reabsorption);04962(Vasopressin-regulated water reabsorption)	Rho GDP dissociation inhibitor beta [Source:HGNC Symbol;Acc:HGNC:679]	protein_coding;processed_transcript;retained_intron	5.95084	4.173	5.07703	8.19058	9.48687	13.8022	0.482879	-1.05027	0.000343411	down	yes
ENSG00000225746	MEG8	ENST00000638012;ENST00000414488;ENST00000553584;ENST00000636391;ENST00000554323;ENST00000554693;ENST00000556720;ENST00000556475;ENST00000648818;ENST00000556637;ENST00000434716;ENST00000553465;ENST00000554369;ENST00000443252;ENST00000637332;ENST00000554485;ENST00000555354;ENST00000427085;ENST00000423708;ENST00000442197;ENST00000649300;ENST00000554852;ENST00000553421;ENST00000636052;ENST00000614605	NA	NA	maternally expressed 8, small nucleolar RNA host gene [Source:HGNC Symbol;Acc:HGNC:14574]	lincRNA;misc_RNA	0.136881	0.151324	0.200046	0.470119	0.218517	0.326129	0.481146	-1.05545	0.0158455	down	yes
ENSG00000210154	MT-TD	ENST00000387419	NA	NA	mitochondrially encoded tRNA-Asp (GAU/C) [Source:HGNC Symbol;Acc:HGNC:7478]	Mt_tRNA	10.9072	14.67	10.8669	22.6045	26.4832	26.9162	0.479502	-1.06039	0.0245514	down	yes
ENSG00000136999	CCN3	ENST00000259526;ENST00000520082	GO:0001525(angiogenesis);GO:0002062(chondrocyte differentiation);GO:0005112(Notch binding);GO:0005178(integrin binding);GO:0005515(protein binding);GO:0005520(insulin-like growth factor binding);GO:0005576(extracellular region);GO:0005737(cytoplasm);GO:0005921(gap junction);GO:0007155(cell adhesion);GO:0008083(growth factor activity);GO:0008201(heparin binding);GO:0010468(regulation of gene expre…	NA	cellular communication network factor 3 [Source:HGNC Symbol;Acc:HGNC:7885]	protein_coding;retained_intron	0.244369	0.162631	0.144917	0.426374	0.352524	0.372599	0.479304	-1.06099	0.0421807	down	yes
ENSG00000107864	CPEB3	ENST00000265997;ENST00000412050;ENST00000614585	GO:0000122(negative regulation of transcription by RNA polymerase II);GO:0000900(translation repressor activity, mRNA regulatory element binding);GO:0003676(nucleic acid binding);GO:0003723(RNA binding);GO:0003730(mRNA 3'-UTR binding);GO:0005515(protein binding);GO:0005634(nucleus);GO:0005737(cytoplasm);GO:0005886(plasma membrane);GO:0006412(translation);GO:0006417(regulation of translation);GO:0…	04114(Oocyte meiosis);04914(Progesterone-mediated oocyte maturation);04914(Progesterone-mediated oocyte maturation)	cytoplasmic polyadenylation element binding protein 3 [Source:HGNC Symbol;Acc:HGNC:21746]	protein_coding	0.115686	0.115815	0.159573	0.237093	0.205041	0.375587	0.478249	-1.06417	0.024685	down	yes
ENSG00000135315	CEP162	ENST00000487999;ENST00000403245;ENST00000461137;ENST00000257766;ENST00000617909;ENST00000497936;ENST00000435955	GO:0005515(protein binding);GO:0005634(nucleus);GO:0005737(cytoplasm);GO:0005813(centrosome);GO:0005814(centriole);GO:0005819(spindle);GO:0005829(cytosol);GO:0005856(cytoskeleton);GO:0005874(microtubule);GO:0005879(axonemal microtubule);GO:0030030(cell projection organization);GO:0060271(cilium assembly);GO:0097711(ciliary basal body-plasma membrane docking);GO:0097711(ciliary basal body-plasma m…	NA	centrosomal protein 162 [Source:HGNC Symbol;Acc:HGNC:21107]	retained_intron;protein_coding;processed_transcript;nonsense_mediated_decay	0.243359	0.115718	0.56694	0.563268	0.53451	0.839455	0.47801	-1.06489	0.0425906	down	yes
ENSG00000127863	TNFRSF19	ENST00000382263;ENST00000248484;ENST00000464735;ENST00000382258;ENST00000403372	GO:0001942(hair follicle development);GO:0005031(tumor necrosis factor-activated receptor activity);GO:0005515(protein binding);GO:0005886(plasma membrane);GO:0006915(apoptotic process);GO:0007254(JNK cascade);GO:0016020(membrane);GO:0016021(integral component of membrane);GO:0033209(tumor necrosis factor-mediated signaling pathway);GO:0038023(signaling receptor activity);GO:0043123(positive regu…	04060(Cytokine-cytokine receptor interaction);04060(Cytokine-cytokine receptor interaction)	TNF receptor superfamily member 19 [Source:HGNC Symbol;Acc:HGNC:11915]	protein_coding;processed_transcript	0.279144	0.0864525	0.241968	0.532483	0.300998	0.440728	0.476817	-1.06849	0.039001	down	yes
ENSG00000012124	CD22	ENST00000085219;ENST00000601769;ENST00000598028;ENST00000594250;ENST00000613136;ENST00000593704;ENST00000598537;ENST00000419549;ENST00000601732;ENST00000544992;ENST00000602123;ENST00000341773;ENST00000536635;ENST00000597916;ENST00000600655;ENST00000599799;ENST00000599717;ENST00000600131;ENST00000593867;ENST00000599811;ENST00000600424;ENST00000598815;ENST00000594125;ENST00000594349;ENST00000595419…	GO:0001791(IgM binding);GO:0005102(signaling receptor binding);GO:0005515(protein binding);GO:0005737(cytoplasm);GO:0005769(early endosome);GO:0005886(plasma membrane);GO:0007155(cell adhesion);GO:0009986(cell surface);GO:0016020(membrane);GO:0016021(integral component of membrane);GO:0019903(protein phosphatase binding);GO:0030100(regulation of endocytosis);GO:0030246(carbohydrate binding);GO:00…	04514(Cell adhesion molecules (CAMs));04640(Hematopoietic cell lineage);04662(B cell receptor signaling pathway);04662(B cell receptor signaling pathway)	CD22 molecule [Source:HGNC Symbol;Acc:HGNC:1643]	protein_coding;nonsense_mediated_decay;processed_transcript;retained_intron	0.176952	0.191702	0.195232	0.46707	0.496684	0.223669	0.474881	-1.07436	0.0259277	down	yes
ENSG00000162704	ARPC5	ENST00000359856;ENST00000462965;ENST00000602490;ENST00000367534;ENST00000294742	GO:0003779(actin binding);GO:0005200(structural constituent of cytoskeleton);GO:0005515(protein binding);GO:0005576(extracellular region);GO:0005634(nucleus);GO:0005737(cytoplasm);GO:0005768(endosome);GO:0005829(cytosol);GO:0005856(cytoskeleton);GO:0005885(Arp2/3 protein complex);GO:0005925(focal adhesion);GO:0014909(smooth muscle cell migration);GO:0015629(actin cytoskeleton);GO:0016477(cell mig…	04144(Endocytosis);04666(Fc gamma R-mediated phagocytosis);04810(Regulation of actin cytoskeleton);05100(Bacterial invasion of epithelial cells);05130(Pathogenic Escherichia coli infection);05131(Shigellosis);05132(Salmonella infection);05132(Salmonella infection)	actin related protein 2/3 complex subunit 5 [Source:HGNC Symbol;Acc:HGNC:708]	protein_coding;processed_transcript;retained_intron	4.20801	11.4267	4.60736	14.2932	12.9806	15.3843	0.474517	-1.07547	0.00153316	down	yes
ENSG00000260916	CCPG1	ENST00000442196;ENST00000569205;ENST00000310958;ENST00000568372;ENST00000568543;ENST00000568592;ENST00000564092;ENST00000563294;ENST00000425574;ENST00000570272;ENST00000568808;ENST00000563171;ENST00000564663	GO:0003674(molecular_function);GO:0005515(protein binding);GO:0007049(cell cycle);GO:0008284(positive regulation of cell population proliferation);GO:0016020(membrane);GO:0016021(integral component of membrane);GO:0045787(positive regulation of cell cycle);GO:0045944(positive regulation of transcription by RNA polymerase II);GO:2001106(regulation of Rho guanyl-nucleotide exchange factor activity)…	NA	cell cycle progression 1 [Source:HGNC Symbol;Acc:HGNC:24227]	protein_coding;retained_intron;processed_transcript;nonsense_mediated_decay	1.81766	0.832006	1.58364	2.87925	3.30197	2.74592	0.474206	-1.07641	0.000234953	down	yes
ENSG00000139278	GLIPR1	ENST00000266659;ENST00000456650;ENST00000550491;ENST00000536703	GO:0005576(extracellular region);GO:0005615(extracellular space);GO:0005886(plasma membrane);GO:0016020(membrane);GO:0016021(integral component of membrane);GO:0019216(regulation of lipid metabolic process);GO:0035577(azurophil granule membrane);GO:0043312(neutrophil degranulation);GO:0043312(neutrophil degranulation)	NA	GLI pathogenesis related 1 [Source:HGNC Symbol;Acc:HGNC:17001]	protein_coding;nonsense_mediated_decay	0.298588	0.182713	0.376964	0.661835	0.53543	0.622588	0.471613	-1.08433	0.00935614	down	yes
ENSG00000091592	NLRP1	ENST00000572272;ENST00000571307;ENST00000577119;ENST00000544378;ENST00000574406;ENST00000617618;ENST00000354411;ENST00000572143;ENST00000613500;ENST00000269280;ENST00000345221;ENST00000574512;ENST00000571451;ENST00000576905;ENST00000262467;ENST00000619223	GO:0000166(nucleotide binding);GO:0002376(immune system process);GO:0005515(protein binding);GO:0005524(ATP binding);GO:0005634(nucleus);GO:0005654(nucleoplasm);GO:0005737(cytoplasm);GO:0005829(cytosol);GO:0006915(apoptotic process);GO:0006919(activation of cysteine-type endopeptidase activity involved in apoptotic process);GO:0006954(inflammatory response);GO:0008656(cysteine-type endopeptidase …	04621(NOD-like receptor signaling pathway);04621(NOD-like receptor signaling pathway)	NLR family pyrin domain containing 1 [Source:HGNC Symbol;Acc:HGNC:14374]	protein_coding;processed_transcript;nonsense_mediated_decay;retained_intron	0.131517	0.0830407	0.170454	0.241669	0.358406	0.221128	0.468839	-1.09284	0.0139244	down	yes
ENSG00000100055	CYTH4	ENST00000462927;ENST00000248901;ENST00000469886;ENST00000439667;ENST00000402997;ENST00000480510;ENST00000467664;ENST00000457992;ENST00000405206;ENST00000447919;ENST00000446506	GO:0000139(Golgi membrane);GO:0005085(guanyl-nucleotide exchange factor activity);GO:0005086(ARF guanyl-nucleotide exchange factor activity);GO:0005829(cytosol);GO:0005886(plasma membrane);GO:0008289(lipid binding);GO:0016020(membrane);GO:0032012(regulation of ARF protein signal transduction);GO:0032012(regulation of ARF protein signal transduction)	04072(Phospholipase D signaling pathway);04144(Endocytosis);04144(Endocytosis)	cytohesin 4 [Source:HGNC Symbol;Acc:HGNC:9505]	retained_intron;protein_coding;processed_transcript	0.167517	0.334127	0.228091	0.577162	0.494288	0.485878	0.468581	-1.09363	0.0177678	down	yes
ENSG00000210195	MT-TT	ENST00000387460	NA	NA	mitochondrially encoded tRNA-Thr (ACN) [Source:HGNC Symbol;Acc:HGNC:7499]	Mt_tRNA	40.1913	66.6179	59.371	107.202	120.22	127.72	0.467926	-1.09565	0.00331225	down	yes
ENSG00000162511	LAPTM5	ENST00000294507;ENST00000464569;ENST00000476492	GO:0005515(protein binding);GO:0005764(lysosome);GO:0005765(lysosomal membrane);GO:0005887(integral component of plasma membrane);GO:0016020(membrane);GO:0016021(integral component of membrane);GO:1990830(cellular response to leukemia inhibitory factor);GO:1990830(cellular response to leukemia inhibitory factor)	04142(Lysosome);04142(Lysosome)	lysosomal protein transmembrane 5 [Source:HGNC Symbol;Acc:HGNC:29612]	protein_coding;processed_transcript	1.0574	0.899056	0.752294	1.99347	1.76801	2.05494	0.465707	-1.10251	0.00250476	down	yes
ENSG00000165813	CCDC186	ENST00000648613;ENST00000369286;ENST00000497592;ENST00000369287;ENST00000490661;ENST00000428953;ENST00000369285	GO:0009617(response to bacterium);GO:0009617(response to bacterium)	NA	coiled-coil domain containing 186 [Source:HGNC Symbol;Acc:HGNC:24349]	protein_coding;processed_transcript;retained_intron	0.271994	0.101813	0.555407	0.601508	0.592918	0.800999	0.465672	-1.10261	0.0292784	down	yes
ENSG00000153234	NR4A2	ENST00000339562;ENST00000421709;ENST00000426264;ENST00000409572;ENST00000417764;ENST00000409108;ENST00000424077;ENST00000417972;ENST00000406048;ENST00000429376	GO:0000122(negative regulation of transcription by RNA polymerase II);GO:0000977(RNA polymerase II regulatory region sequence-specific DNA binding);GO:0000978(RNA polymerase II proximal promoter sequence-specific DNA binding);GO:0000981(DNA-binding transcription factor activity, RNA polymerase II-specific);GO:0001228(DNA-binding transcription activator activity, RNA polymerase II-specific);GO:000…	04925(Aldosterone synthesis and secretion);04928(Parathyroid hormone synthesis, secretion and action);04928(Parathyroid hormone synthesis, secretion and action)	nuclear receptor subfamily 4 group A member 2 [Source:HGNC Symbol;Acc:HGNC:7981]	protein_coding;nonsense_mediated_decay	0.213983	0.2057	0.252899	0.551038	0.316955	0.578939	0.464834	-1.10521	0.0209815	down	yes
ENSG00000239389	PCDHA13	ENST00000409494;ENST00000289272;ENST00000617769	GO:0005509(calcium ion binding);GO:0005886(plasma membrane);GO:0005887(integral component of plasma membrane);GO:0007155(cell adhesion);GO:0007156(homophilic cell adhesion via plasma membrane adhesion molecules);GO:0016020(membrane);GO:0016021(integral component of membrane);GO:0016021(integral component of membrane)	NA	protocadherin alpha 13 [Source:HGNC Symbol;Acc:HGNC:8667]	protein_coding	0.735347	1.18951	0.595828	1.28501	2.13885	2.00393	0.464403	-1.10655	0.00661068	down	yes
ENSG00000149527	PLCH2	ENST00000449969;ENST00000378486;ENST00000343889;ENST00000473964;ENST00000609981;ENST00000462379;ENST00000278878;ENST00000419816	GO:0003674(molecular_function);GO:0004435(phosphatidylinositol phospholipase C activity);GO:0004629(phospholipase C activity);GO:0005509(calcium ion binding);GO:0005575(cellular_component);GO:0005737(cytoplasm);GO:0005886(plasma membrane);GO:0006629(lipid metabolic process);GO:0007165(signal transduction);GO:0008081(phosphoric diester hydrolase activity);GO:0008150(biological_process);GO:0016020(…	00562(Inositol phosphate metabolism);00562(Inositol phosphate metabolism)	phospholipase C eta 2 [Source:HGNC Symbol;Acc:HGNC:29037]	protein_coding;retained_intron	0.113872	0.34085	0.212351	0.403641	0.605718	0.427697	0.464194	-1.1072	0.0195618	down	yes
ENSG00000153294	ADGRF4	ENST00000283303;ENST00000327753;ENST00000371220	GO:0004888(transmembrane signaling receptor activity);GO:0004930(G protein-coupled receptor activity);GO:0007165(signal transduction);GO:0007166(cell surface receptor signaling pathway);GO:0007186(G protein-coupled receptor signaling pathway);GO:0016020(membrane);GO:0016021(integral component of membrane);GO:0016021(integral component of membrane)	NA	adhesion G protein-coupled receptor F4 [Source:HGNC Symbol;Acc:HGNC:19011]	protein_coding	0.680777	0.566721	0.889531	1.44371	1.58009	1.59481	0.4627	-1.11185	0.00297259	down	yes
ENSG00000175395	ZNF25	ENST00000302609;ENST00000467975;ENST00000374633	GO:0000981(DNA-binding transcription factor activity, RNA polymerase II-specific);GO:0003676(nucleic acid binding);GO:0003677(DNA binding);GO:0005622(intracellular);GO:0005634(nucleus);GO:0006355(regulation of transcription, DNA-templated);GO:0006357(regulation of transcription by RNA polymerase II);GO:0046872(metal ion binding);GO:0046872(metal ion binding)	05168(Herpes simplex virus 1 infection);05168(Herpes simplex virus 1 infection)	zinc finger protein 25 [Source:HGNC Symbol;Acc:HGNC:13043]	protein_coding;processed_transcript	0.321333	0.227047	0.504026	0.708053	0.711497	0.856216	0.46244	-1.11266	0.0114915	down	yes
ENSG00000123689	G0S2	ENST00000367029	GO:0003674(molecular_function);GO:0005515(protein binding);GO:0005739(mitochondrion);GO:0005811(lipid droplet);GO:0006915(apoptotic process);GO:0019216(regulation of lipid metabolic process);GO:0097191(extrinsic apoptotic signaling pathway);GO:0120162(positive regulation of cold-induced thermogenesis);GO:2001238(positive regulation of extrinsic apoptotic signaling pathway)	NA	G0/G1 switch 2 [Source:HGNC Symbol;Acc:HGNC:30229]	protein_coding	0.8097	0.783876	0.543061	1.35688	1.57917	1.68852	0.462019	-1.11398	0.0269327	down	yes
ENSG00000182836	PLCXD3	ENST00000377801;ENST00000328457	GO:0005737(cytoplasm);GO:0006629(lipid metabolic process);GO:0007165(signal transduction);GO:0008081(phosphoric diester hydrolase activity);GO:0016042(lipid catabolic process);GO:0016787(hydrolase activity);GO:0016787(hydrolase activity)	NA	phosphatidylinositol specific phospholipase C X domain containing 3 [Source:HGNC Symbol;Acc:HGNC:31822]	protein_coding	0.141266	0.0528777	0.0734048	0.251452	0.16206	0.16747	0.460511	-1.11869	0.0328004	down	yes
ENSG00000213625	LEPROT	ENST00000371065;ENST00000497874;ENST00000475108;ENST00000488747;ENST00000613538;ENST00000484243	GO:0000139(Golgi membrane);GO:0005102(signaling receptor binding);GO:0005515(protein binding);GO:0005768(endosome);GO:0005794(Golgi apparatus);GO:0010008(endosome membrane);GO:0016020(membrane);GO:0016021(integral component of membrane);GO:0032511(late endosome to vacuole transport via multivesicular body sorting pathway);GO:0046426(negative regulation of receptor signaling pathway via JAK-STAT);…	NA	leptin receptor overlapping transcript [Source:HGNC Symbol;Acc:HGNC:29477]	protein_coding;processed_transcript	2.63895	7.39761	2.54236	11.4139	3.11116	12.8646	0.459257	-1.12263	0.0270197	down	yes
ENSG00000213654	GPSM3	ENST00000375040;ENST00000472768;ENST00000375043;ENST00000487761;ENST00000619085	GO:0002690(positive regulation of leukocyte chemotaxis);GO:0003674(molecular_function);GO:0005515(protein binding);GO:0005575(cellular_component);GO:0005737(cytoplasm);GO:0005886(plasma membrane);GO:0006955(immune response);GO:0008150(biological_process);GO:0030695(GTPase regulator activity);GO:0050729(positive regulation of inflammatory response);GO:0050790(regulation of catalytic activity);GO:1…	NA	G protein signaling modulator 3 [Source:HGNC Symbol;Acc:HGNC:13945]	protein_coding;nonsense_mediated_decay	0.708571	1.06961	1.18225	1.97122	2.49905	1.98076	0.458909	-1.12372	0.00672275	down	yes
ENSG00000124491	F13A1	ENST00000264870;ENST00000445223;ENST00000479211;ENST00000431222;ENST00000451619;ENST00000414279	GO:0002576(platelet degranulation);GO:0003810(protein-glutamine gamma-glutamyltransferase activity);GO:0005576(extracellular region);GO:0005737(cytoplasm);GO:0007596(blood coagulation);GO:0007599(hemostasis);GO:0016740(transferase activity);GO:0016746(transferase activity, transferring acyl groups);GO:0018149(peptide cross-linking);GO:0019221(cytokine-mediated signaling pathway);GO:0031093(platel…	04610(Complement and coagulation cascades);04610(Complement and coagulation cascades)	coagulation factor XIII A chain [Source:HGNC Symbol;Acc:HGNC:3531]	protein_coding;retained_intron	0.18706	0.168587	0.533261	0.563327	0.62974	0.744688	0.458731	-1.12428	0.0299817	down	yes
ENSG00000249992	TMEM158	ENST00000503771	GO:0016020(membrane);GO:0016021(integral component of membrane);GO:0042277(peptide binding)	NA	transmembrane protein 158 (gene/pseudogene) [Source:HGNC Symbol;Acc:HGNC:30293]	protein_coding	3.3105	3.01587	3.847	7.05434	8.58156	6.724	0.454983	-1.13612	0.000193063	down	yes
ENSG00000264112	AC015813	ENST00000585065;ENST00000577267;ENST00000582096	NA	NA	novel transcript	lincRNA	0.394363	0.623419	0.486156	0.648329	1.3395	1.33632	0.452429	-1.14424	0.00686671	down	yes
ENSG00000165029	ABCA1	ENST00000374736;ENST00000423487;ENST00000374733;ENST00000494467	GO:0000166(nucleotide binding);GO:0002790(peptide secretion);GO:0005102(signaling receptor binding);GO:0005319(lipid transporter activity);GO:0005515(protein binding);GO:0005524(ATP binding);GO:0005543(phospholipid binding);GO:0005548(phospholipid transporter activity);GO:0005789(endoplasmic reticulum membrane);GO:0005794(Golgi apparatus);GO:0005886(plasma membrane);GO:0005887(integral component …	02010(ABC transporters);04975(Fat digestion and absorption);04979(Cholesterol metabolism);04979(Cholesterol metabolism)	ATP binding cassette subfamily A member 1 [Source:HGNC Symbol;Acc:HGNC:29]	protein_coding;processed_transcript	0.786906	0.480099	0.531099	1.23454	1.33303	1.42664	0.450177	-1.15144	0.000218044	down	yes
ENSG00000187079	TEAD1	ENST00000526600;ENST00000527636;ENST00000638666;ENST00000525312;ENST00000527575;ENST00000527376;ENST00000334310	GO:0000978(RNA polymerase II proximal promoter sequence-specific DNA binding);GO:0000981(DNA-binding transcription factor activity, RNA polymerase II-specific);GO:0000987(proximal promoter sequence-specific DNA binding);GO:0001085(RNA polymerase II transcription factor binding);GO:0001134(transcription regulator recruiting activity);GO:0001223(transcription coactivator binding);GO:0001228(DNA-bin…	04390(Hippo signaling pathway);04392(Hippo signaling pathway - multiple species);04392(Hippo signaling pathway - multiple species)	TEA domain transcription factor 1 [Source:HGNC Symbol;Acc:HGNC:11714]	protein_coding;retained_intron	1.13608	0.80091	1.29773	2.42541	2.75628	2.02564	0.44881	-1.15582	1.59189e-05	down	yes
ENSG00000255248	MIR100HG	ENST00000648209;ENST00000650497;ENST00000528986;ENST00000648734;ENST00000649293;ENST00000531470;ENST00000533109;ENST00000527474;ENST00000649216;ENST00000649544;ENST00000649626;ENST00000648084;ENST00000530072;ENST00000529823;ENST00000531629;ENST00000532315;ENST00000637700;ENST00000647591;ENST00000648213;ENST00000526674;ENST00000648082;ENST00000534782;ENST00000648163;ENST00000647967;ENST00000530955…	NA	NA	mir-100-let-7a-2-mir-125b-1 cluster host gene [Source:HGNC Symbol;Acc:HGNC:39522]	lincRNA;sense_overlapping	0.2295	0.172889	0.210593	0.503082	0.472645	0.395598	0.447	-1.16165	0.000807609	down	yes
ENSG00000172137	CALB2	ENST00000302628;ENST00000490520;ENST00000467817;ENST00000562305;ENST00000349553	GO:0005509(calcium ion binding);GO:0005634(nucleus);GO:0005737(cytoplasm);GO:0005829(cytosol);GO:0005921(gap junction);GO:0030425(dendrite);GO:0032420(stereocilium);GO:0032437(cuticular plate);GO:0043005(neuron projection);GO:0045202(synapse);GO:0046872(metal ion binding);GO:0097060(synaptic membrane);GO:0098688(parallel fiber to Purkinje cell synapse);GO:0098793(presynapse);GO:0099509(regulation…	NA	calbindin 2 [Source:HGNC Symbol;Acc:HGNC:1435]	protein_coding;retained_intron	0.288731	0.170817	0.655359	1.07158	0.721195	0.704409	0.446466	-1.16338	0.0398882	down	yes
ENSG00000166847	DCTN5	ENST00000300087;ENST00000566298;ENST00000563998;ENST00000563614;ENST00000566053;ENST00000568589;ENST00000563188;ENST00000568272	GO:0000775(chromosome, centromeric region);GO:0000776(kinetochore);GO:0000777(condensed chromosome kinetochore);GO:0003281(ventricular septum development);GO:0005515(protein binding);GO:0005654(nucleoplasm);GO:0005694(chromosome);GO:0005737(cytoplasm);GO:0005813(centrosome);GO:0005829(cytosol);GO:0005856(cytoskeleton);GO:0006888(endoplasmic reticulum to Golgi vesicle-mediated transport);GO:001988…	04962(Vasopressin-regulated water reabsorption);04962(Vasopressin-regulated water reabsorption)	dynactin subunit 5 [Source:HGNC Symbol;Acc:HGNC:24594]	protein_coding;retained_intron;nonsense_mediated_decay	2.03645	2.02453	2.77132	1.82927	7.12642	6.45499	0.443348	-1.17349	0.00207901	down	yes
ENSG00000204282	TNRC6C-AS1	ENST00000589217;ENST00000592939	NA	NA	TNRC6C antisense RNA 1 [Source:HGNC Symbol;Acc:HGNC:44360]	antisense;retained_intron	0.110903	0.0552615	0.0857884	0.159547	0.186074	0.22637	0.440484	-1.18284	0.0295696	down	yes
ENSG00000130592	LSP1	ENST00000417766;ENST00000432093;ENST00000484895;ENST00000612798;ENST00000457279;ENST00000381775;ENST00000311604;ENST00000451814;ENST00000446808;ENST00000406638;ENST00000405957;ENST00000418975;ENST00000421485;ENST00000464670;ENST00000472974;ENST00000429923;ENST00000485341	GO:0003779(actin binding);GO:0005886(plasma membrane);GO:0006968(cellular defense response);GO:0007165(signal transduction);GO:0015629(actin cytoskeleton);GO:0016020(membrane);GO:0070062(extracellular exosome);GO:0070062(extracellular exosome)	04625(C-type lectin receptor signaling pathway);05152(Tuberculosis);05152(Tuberculosis)	lymphocyte specific protein 1 [Source:HGNC Symbol;Acc:HGNC:6707]	protein_coding;retained_intron;processed_transcript	0.0888003	0.0961892	0.0919277	0.174736	0.185418	0.268522	0.440477	-1.18286	0.0246705	down	yes
ENSG00000130600	H19	ENST00000411861;ENST00000412788;ENST00000431095;ENST00000417089;ENST00000414790;ENST00000442037;ENST00000436715;ENST00000439725;ENST00000447298;ENST00000422826;ENST00000428066;ENST00000643292	NA	NA	H19, imprinted maternally expressed transcript [Source:HGNC Symbol;Acc:HGNC:4713]	retained_intron;lincRNA	2.92816	2.46692	1.5942	3.30521	4.44572	8.12448	0.440258	-1.18358	0.00279813	down	yes
ENSG00000203668	CHML	ENST00000366553;ENST00000636025;ENST00000638121;ENST00000638160;ENST00000638018	GO:0004930(G protein-coupled receptor activity);GO:0005092(GDP-dissociation inhibitor activity);GO:0005096(GTPase activator activity);GO:0005634(nucleus);GO:0005654(nucleoplasm);GO:0005737(cytoplasm);GO:0005829(cytosol);GO:0005968(Rab-protein geranylgeranyltransferase complex);GO:0006886(intracellular protein transport);GO:0007186(G protein-coupled receptor signaling pathway);GO:0007264(small GTP…	NA	CHM like, Rab escort protein 2 [Source:HGNC Symbol;Acc:HGNC:1941]	protein_coding;processed_transcript	0.615589	0.256934	0.622317	1.04405	1.18454	1.1682	0.440074	-1.18418	0.00256379	down	yes
ENSG00000241790	ENO1P4	ENST00000416471	NA	NA	enolase 1 pseudogene 4 [Source:HGNC Symbol;Acc:HGNC:37945]	processed_pseudogene	0.430507	0.31299	1.87263	2.14934	1.63297	2.21814	0.435988	-1.19764	0.0417047	down	yes
ENSG00000163126	ANKRD23	ENST00000331001;ENST00000476975;ENST00000318357;ENST00000482175;ENST00000418232;ENST00000462692	GO:0005515(protein binding);GO:0005634(nucleus);GO:0005654(nucleoplasm);GO:0005829(cytosol);GO:0009612(response to mechanical stimulus);GO:0014704(intercalated disc);GO:0015629(actin cytoskeleton);GO:0030016(myofibril);GO:0031432(titin binding);GO:0031432(titin binding)	NA	ankyrin repeat domain 23 [Source:HGNC Symbol;Acc:HGNC:24470]	protein_coding;processed_transcript;retained_intron	0.114955	0.177561	0.0853646	0.266831	0.34821	0.255281	0.434185	-1.20362	0.0292803	down	yes
ENSG00000283959	AP002851	ENST00000640504	NA	NA	novel transcript	bidirectional_promoter_lncRNA	0.23387	0.309519	0.33488	0.695835	0.551785	0.78561	0.431958	-1.21104	0.0128523	down	yes
ENSG00000280128	AL662795	ENST00000624252	NA	NA	TEC	TEC	0.205583	0.112829	0.247565	0.42215	0.376762	0.512248	0.431661	-1.21203	0.0129082	down	yes
ENSG00000163376	KBTBD8	ENST00000417314;ENST00000484414;ENST00000469661;ENST00000460576;ENST00000460784	GO:0005515(protein binding);GO:0005737(cytoplasm);GO:0005794(Golgi apparatus);GO:0005819(spindle);GO:0005829(cytosol);GO:0005856(cytoskeleton);GO:0006417(regulation of translation);GO:0006513(protein monoubiquitination);GO:0014029(neural crest formation);GO:0014032(neural crest cell development);GO:0031463(Cul3-RING ubiquitin ligase complex);GO:0043687(post-translational protein modification);GO:…	NA	kelch repeat and BTB domain containing 8 [Source:HGNC Symbol;Acc:HGNC:30691]	protein_coding;processed_transcript	0.339465	0.260764	0.440553	0.63371	0.630216	1.16743	0.428066	-1.22409	0.00536485	down	yes
ENSG00000264070	DND1P1	ENST00000580842	NA	NA	DND microRNA-mediated repression inhibitor 1 pseudogene 1 [Source:HGNC Symbol;Acc:HGNC:31444]	processed_pseudogene	0.393385	0.491861	0.325805	0.768818	1.0678	0.99707	0.427376	-1.22642	0.0192219	down	yes
ENSG00000124762	CDKN1A	ENST00000405375;ENST00000373711;ENST00000244741;ENST00000459970;ENST00000615513;ENST00000448526;ENST00000462537;ENST00000478800	GO:0000079(regulation of cyclin-dependent protein serine/threonine kinase activity);GO:0000082(G1/S transition of mitotic cell cycle);GO:0000086(G2/M transition of mitotic cell cycle);GO:0000307(cyclin-dependent protein kinase holoenzyme complex);GO:0004860(protein kinase inhibitor activity);GO:0004861(cyclin-dependent protein serine/threonine kinase inhibitor activity);GO:0005515(protein binding…	01522(Endocrine resistance);01524(Platinum drug resistance);04012(ErbB signaling pathway);04066(HIF-1 signaling pathway);04068(FoxO signaling pathway);04110(Cell cycle);04115(p53 signaling pathway);04151(PI3K-Akt signaling pathway);04218(Cellular senescence);04630(Jak-STAT signaling pathway);04921(Oxytocin signaling pathway);04928(Parathyroid hormone synthesis, secretion and action);04934(Cushing…	cyclin dependent kinase inhibitor 1A [Source:HGNC Symbol;Acc:HGNC:1784]	protein_coding;processed_transcript	27.7945	35.0435	21.2733	57.6978	69.1686	70.1348	0.426958	-1.22783	7.69037e-09	down	yes
ENSG00000205426	KRT81	ENST00000327741;ENST00000615839	GO:0005198(structural molecule activity);GO:0005515(protein binding);GO:0005615(extracellular space);GO:0005829(cytosol);GO:0005882(intermediate filament);GO:0031424(keratinization);GO:0045095(keratin filament);GO:0070268(cornification);GO:0070268(cornification)	NA	keratin 81 [Source:HGNC Symbol;Acc:HGNC:6458]	protein_coding	0.615322	0.789689	0.570926	1.56909	1.63348	1.42651	0.426853	-1.22819	0.00512225	down	yes
ENSG00000135074	ADAM19	ENST00000257527;ENST00000517374;ENST00000517905;ENST00000519752;ENST00000517951	GO:0001890(placenta development);GO:0004222(metalloendopeptidase activity);GO:0005515(protein binding);GO:0005634(nucleus);GO:0005794(Golgi apparatus);GO:0005886(plasma membrane);GO:0006508(proteolysis);GO:0006509(membrane protein ectodomain proteolysis);GO:0008233(peptidase activity);GO:0008237(metallopeptidase activity);GO:0010628(positive regulation of gene expression);GO:0016020(membrane);GO:…	NA	ADAM metallopeptidase domain 19 [Source:HGNC Symbol;Acc:HGNC:197]	protein_coding;retained_intron;nonsense_mediated_decay	3.96938	3.52403	1.50186	6.7379	6.39183	8.02849	0.425143	-1.23398	0.000101742	down	yes
ENSG00000143127	ITGA10	ENST00000369304;ENST00000539363;ENST00000468261;ENST00000481236	GO:0005518(collagen binding);GO:0005886(plasma membrane);GO:0007155(cell adhesion);GO:0007160(cell-matrix adhesion);GO:0007229(integrin-mediated signaling pathway);GO:0008305(integrin complex);GO:0016020(membrane);GO:0016021(integral component of membrane);GO:0030198(extracellular matrix organization);GO:0034680(integrin alpha10-beta1 complex);GO:0046872(metal ion binding);GO:0098639(collagen bin…	04151(PI3K-Akt signaling pathway);04510(Focal adhesion);04512(ECM-receptor interaction);04810(Regulation of actin cytoskeleton);05165(Human papillomavirus infection);05410(Hypertrophic cardiomyopathy (HCM));05412(Arrhythmogenic right ventricular cardiomyopathy (ARVC));05414(Dilated cardiomyopathy (DCM));05414(Dilated cardiomyopathy (DCM))	integrin subunit alpha 10 [Source:HGNC Symbol;Acc:HGNC:6135]	protein_coding;retained_intron;processed_transcript	0.0656284	0.140207	0.121375	0.294977	0.215739	0.260958	0.424028	-1.23777	0.0134635	down	yes
ENSG00000258301	VASH1-AS1	ENST00000556072;ENST00000554058	NA	NA	VASH1 antisense RNA 1 [Source:HGNC Symbol;Acc:HGNC:53215]	lincRNA	0.307106	0.247619	0.121099	0.408819	0.50131	0.68583	0.42346	-1.2397	0.0309055	down	yes
ENSG00000275764	AC092747	ENST00000620519	NA	NA	novel transcript	lincRNA	0.715493	0.369919	0.973217	1.51064	1.77763	1.58588	0.422357	-1.24347	0.00753347	down	yes
ENSG00000279800	BCLAF1P2	ENST00000624956	NA	NA	BCL2 associated transcription factor 1 pseudogene 2 [Source:HGNC Symbol;Acc:HGNC:51807]	processed_pseudogene	0.779463	0.185199	0.327312	1.06749	1.5816	0.412168	0.42204	-1.24455	0.0425572	down	yes
ENSG00000079385	CEACAM1	ENST00000161559;ENST00000488639;ENST00000485605;ENST00000403444;ENST00000465051;ENST00000403461;ENST00000600172;ENST00000358394;ENST00000352591;ENST00000599389;ENST00000471298;ENST00000344391;ENST00000377806;ENST00000403136	GO:0001525(angiogenesis);GO:0001558(regulation of cell growth);GO:0001568(blood vessel development);GO:0001915(negative regulation of T cell mediated cytotoxicity);GO:0002859(negative regulation of natural killer cell mediated cytotoxicity directed against tumor cell target);GO:0003674(molecular_function);GO:0003779(actin binding);GO:0005515(protein binding);GO:0005516(calmodulin binding);GO:0005…	NA	carcinoembryonic antigen related cell adhesion molecule 1 [Source:HGNC Symbol;Acc:HGNC:1814]	protein_coding;processed_transcript;retained_intron	0.209442	0.15567	0.0873608	0.342036	0.376838	0.354347	0.421603	-1.24604	0.0115317	down	yes
ENSG00000171346	KRT15	ENST00000474031;ENST00000463447;ENST00000586794;ENST00000393976;ENST00000393974;ENST00000497016;ENST00000254043;ENST00000458290;ENST00000470004	GO:0005198(structural molecule activity);GO:0005200(structural constituent of cytoskeleton);GO:0005515(protein binding);GO:0005634(nucleus);GO:0005829(cytosol);GO:0005882(intermediate filament);GO:0007010(cytoskeleton organization);GO:0008544(epidermis development);GO:0031424(keratinization);GO:0070062(extracellular exosome);GO:0070268(cornification);GO:0097110(scaffold protein binding);GO:009711…	04915(Estrogen signaling pathway);04915(Estrogen signaling pathway)	keratin 15 [Source:HGNC Symbol;Acc:HGNC:6421]	retained_intron;protein_coding;nonsense_mediated_decay	0.177761	0.113414	0.163419	0.327185	0.403208	0.34826	0.421446	-1.24658	0.00589615	down	yes
ENSG00000197467	COL13A1	ENST00000520133;ENST00000456019;ENST00000645393;ENST00000520267;ENST00000479733;ENST00000478219;ENST00000398969;ENST00000518052;ENST00000484990;ENST00000517713;ENST00000357811;ENST00000522165;ENST00000398978;ENST00000398975;ENST00000354547	GO:0001503(ossification);GO:0001763(morphogenesis of a branching structure);GO:0001958(endochondral ossification);GO:0005201(extracellular matrix structural constituent);GO:0005515(protein binding);GO:0005576(extracellular region);GO:0005581(collagen trimer);GO:0005600(collagen type XIII trimer);GO:0005615(extracellular space);GO:0005788(endoplasmic reticulum lumen);GO:0005886(plasma membrane);GO…	04974(Protein digestion and absorption);04974(Protein digestion and absorption)	collagen type XIII alpha 1 chain [Source:HGNC Symbol;Acc:HGNC:2190]	protein_coding;nonsense_mediated_decay;retained_intron;processed_transcript	1.20905	1.0929	1.65401	3.62424	3.12691	2.63573	0.421435	-1.24662	3.21883e-05	down	yes
ENSG00000241081	RPL22P2	ENST00000469811	NA	NA	ribosomal protein L22 pseudogene 2 [Source:HGNC Symbol;Acc:HGNC:19794]	processed_pseudogene	0.992762	1.26423	1.78662	2.50558	3.90211	3.20526	0.420643	-1.24933	0.0187606	down	yes
ENSG00000189423	USP32P3	ENST00000413270;ENST00000583574;ENST00000602334;ENST00000645543	NA	NA	ubiquitin specific peptidase 32 pseudogene 3 [Source:HGNC Symbol;Acc:HGNC:43576]	transcribed_unprocessed_pseudogene;processed_transcript	0.169103	0.135933	0.357252	0.470733	0.517944	0.586597	0.420427	-1.25007	0.016204	down	yes
ENSG00000257950	P2RX5-TAX1BP3	ENST00000550383	NA	NA	P2RX5-TAX1BP3 readthrough (NMD candidate) [Source:HGNC Symbol;Acc:HGNC:49191]	nonsense_mediated_decay	1.0912	1.56074	1.11607	1.25667	4.40923	3.54801	0.408949	-1.29001	0.00240106	down	yes
ENSG00000280138	AC027290	ENST00000623210	NA	NA	novel transcript	TEC	0.048283	0.025712	0.02235	0.082792	0.029558	0.123263	0.408912	-1.29014	0.0324444	down	yes
ENSG00000125285	SOX21	ENST00000376945	GO:0000122(negative regulation of transcription by RNA polymerase II);GO:0000978(RNA polymerase II proximal promoter sequence-specific DNA binding);GO:0000981(DNA-binding transcription factor activity, RNA polymerase II-specific);GO:0001228(DNA-binding transcription activator activity, RNA polymerase II-specific);GO:0001942(hair follicle development);GO:0003677(DNA binding);GO:0003700(DNA-binding…	NA	SRY-box 21 [Source:HGNC Symbol;Acc:HGNC:11197]	protein_coding	0.475485	0.593667	0.71372	1.64659	1.09893	1.64869	0.405732	-1.3014	0.00165288	down	yes
ENSG00000177311	ZBTB38	ENST00000513619;ENST00000321464;ENST00000513570;ENST00000512327;ENST00000507722;ENST00000509842;ENST00000510726;ENST00000637056;ENST00000506623;ENST00000513258;ENST00000510338;ENST00000512769;ENST00000509883;ENST00000509813;ENST00000504673;ENST00000503809;ENST00000514251;ENST00000441582;ENST00000636289;ENST00000512276;ENST00000507657;ENST00000513249;ENST00000637706	GO:0000981(DNA-binding transcription factor activity, RNA polymerase II-specific);GO:0003676(nucleic acid binding);GO:0003677(DNA binding);GO:0003700(DNA-binding transcription factor activity);GO:0005515(protein binding);GO:0005634(nucleus);GO:0005654(nucleoplasm);GO:0005694(chromosome);GO:0006275(regulation of DNA replication);GO:0006355(regulation of transcription, DNA-templated);GO:0006974(cel…	NA	zinc finger and BTB domain containing 38 [Source:HGNC Symbol;Acc:HGNC:26636]	processed_transcript;protein_coding;retained_intron	0.385701	0.142374	1.12606	1.92871	1.80463	0.349325	0.405161	-1.30343	0.0408084	down	yes
ENSG00000227218	AL157935	ENST00000587355;ENST00000588890;ENST00000592240;ENST00000587978;ENST00000586374;ENST00000415141;ENST00000590283;ENST00000608805;ENST00000591408	NA	NA	novel transcript	antisense	0.137848	0.187495	0.19569	0.74203	0.203076	0.341434	0.404988	-1.30405	0.0315775	down	yes
ENSG00000186451	SPATA12	ENST00000334325	NA	NA	spermatogenesis associated 12 [Source:HGNC Symbol;Acc:HGNC:23221]	protein_coding	0.13932	0.502572	0.516028	1.15505	1.07924	0.625935	0.404835	-1.3046	0.0224358	down	yes
ENSG00000188549	CCDC9B	ENST00000559313;ENST00000558912;ENST00000382688;ENST00000560922;ENST00000558858;ENST00000397536;ENST00000557973	GO:0003723(RNA binding);GO:0003723(RNA binding)	NA	coiled-coil domain containing 9B [Source:HGNC Symbol;Acc:HGNC:33488]	protein_coding;retained_intron;processed_transcript	1.41916	1.10979	0.644461	1.9553	4.21504	1.67532	0.404479	-1.30586	0.00144353	down	yes
ENSG00000243716	NPIPB5	ENST00000517539;ENST00000521555;ENST00000415654;ENST00000546168;ENST00000357370;ENST00000442450;ENST00000356156;ENST00000451409;ENST00000543997;ENST00000544308;ENST00000538590;ENST00000424340;ENST00000541664;ENST00000541154;ENST00000517347;ENST00000621622;ENST00000539604;ENST00000538509;ENST00000539929;ENST00000540704;ENST00000415833;ENST00000543407;ENST00000538606;ENST00000536620;ENST00000542518…	GO:0005654(nucleoplasm);GO:0016020(membrane);GO:0016021(integral component of membrane);GO:0016021(integral component of membrane)	NA	nuclear pore complex interacting protein family member B5 [Source:HGNC Symbol;Acc:HGNC:37233]	protein_coding;nonsense_mediated_decay;processed_transcript;retained_intron	1.47337	0.774711	2.95662	3.80064	4.10806	5.01758	0.402645	-1.31242	0.00024975	down	yes
ENSG00000248015	AC005329	ENST00000501448;ENST00000589734;ENST00000585596;ENST00000650765	NA	NA	novel transcript, antisense to NDUFS7	antisense	0.0893209	0.112191	0.120569	0.200614	0.345585	0.253751	0.402627	-1.31249	0.0152767	down	yes
ENSG00000107815	TWNK	ENST00000370228;ENST00000311916;ENST00000650396;ENST00000646226;ENST00000476766;ENST00000459764;ENST00000473656;ENST00000643860;ENST00000647109	GO:0000166(nucleotide binding);GO:0002020(protease binding);GO:0003678(DNA helicase activity);GO:0003697(single-stranded DNA binding);GO:0004386(helicase activity);GO:0005524(ATP binding);GO:0005739(mitochondrion);GO:0005759(mitochondrial matrix);GO:0006260(DNA replication);GO:0006264(mitochondrial DNA replication);GO:0006268(DNA unwinding involved in DNA replication);GO:0006390(mitochondrial tra…	NA	twinkle mtDNA helicase [Source:HGNC Symbol;Acc:HGNC:1160]	protein_coding;nonsense_mediated_decay;retained_intron	2.37153	2.44179	4.0657	6.4875	7.40899	8.36051	0.398932	-1.32579	1.24135e-06	down	yes
ENSG00000135976	ANKRD36	ENST00000652721;ENST00000452478;ENST00000494336;ENST00000461153;ENST00000639293;ENST00000420699;ENST00000620383;ENST00000421946	GO:0005515(protein binding);GO:0005515(protein binding)	NA	ankyrin repeat domain 36 [Source:HGNC Symbol;Acc:HGNC:24079]	protein_coding;retained_intron	0.114166	0.0337089	0.119255	0.204863	0.1963	0.273319	0.396051	-1.33624	0.00985603	down	yes
ENSG00000198838	RYR3	ENST00000637072;ENST00000634891;ENST00000636845;ENST00000638032;ENST00000635790;ENST00000389232;ENST00000560791;ENST00000636497;ENST00000636753;ENST00000638052;ENST00000634418;ENST00000637201;ENST00000559333;ENST00000635749;ENST00000636583;ENST00000637948;ENST00000634730;ENST00000636568;ENST00000637615;ENST00000559917;ENST00000638145;ENST00000634750;ENST00000635842;ENST00000638038;ENST00000636878…	GO:0005216(ion channel activity);GO:0005219(ryanodine-sensitive calcium-release channel activity);GO:0005262(calcium channel activity);GO:0005509(calcium ion binding);GO:0005515(protein binding);GO:0005516(calmodulin binding);GO:0005623(cell);GO:0005783(endoplasmic reticulum);GO:0005790(smooth endoplasmic reticulum);GO:0005886(plasma membrane);GO:0006811(ion transport);GO:0006816(calcium ion tran…	04020(Calcium signaling pathway);04371(Apelin signaling pathway);04713(Circadian entrainment);04921(Oxytocin signaling pathway);04970(Salivary secretion);05010(Alzheimer disease);05010(Alzheimer disease)	ryanodine receptor 3 [Source:HGNC Symbol;Acc:HGNC:10485]	processed_transcript;protein_coding;nonsense_mediated_decay;retained_intron	0.0182599	0.0364434	0.0440204	0.0917572	0.0588444	0.0989648	0.395581	-1.33796	0.0100607	down	yes
ENSG00000159167	STC1	ENST00000290271;ENST00000524323	GO:0001503(ossification);GO:0001886(endothelial cell morphogenesis);GO:0003421(growth plate cartilage axis specification);GO:0005179(hormone activity);GO:0005576(extracellular region);GO:0005615(extracellular space);GO:0005634(nucleus);GO:0005737(cytoplasm);GO:0006874(cellular calcium ion homeostasis);GO:0007566(embryo implantation);GO:0010469(regulation of signaling receptor activity);GO:0010596…	NA	stanniocalcin 1 [Source:HGNC Symbol;Acc:HGNC:11373]	protein_coding	2.68486	1.93264	3.182	6.85279	6.47318	6.4075	0.395242	-1.33919	2.10879e-07	down	yes
ENSG00000122641	INHBA	ENST00000638023;ENST00000242208;ENST00000464515;ENST00000416150;ENST00000442711	GO:0000082(G1/S transition of mitotic cell cycle);GO:0001541(ovarian follicle development);GO:0001707(mesoderm formation);GO:0001942(hair follicle development);GO:0002244(hematopoietic progenitor cell differentiation);GO:0005102(signaling receptor binding);GO:0005125(cytokine activity);GO:0005160(transforming growth factor beta receptor binding);GO:0005179(hormone activity);GO:0005515(protein bin…	04060(Cytokine-cytokine receptor interaction);04350(TGF-beta signaling pathway);04550(Signaling pathways regulating pluripotency of stem cells);04550(Signaling pathways regulating pluripotency of stem cells)	inhibin subunit beta A [Source:HGNC Symbol;Acc:HGNC:6066]	protein_coding;processed_transcript	0.0823202	0.0295739	0.055103	0.177207	0.127073	0.118993	0.394538	-1.34176	0.0130481	down	yes
ENSG00000112852	PCDHB2	ENST00000194155;ENST00000622947;ENST00000624994;ENST00000625033;ENST00000624874	GO:0005509(calcium ion binding);GO:0005886(plasma membrane);GO:0005887(integral component of plasma membrane);GO:0007155(cell adhesion);GO:0007156(homophilic cell adhesion via plasma membrane adhesion molecules);GO:0007268(chemical synaptic transmission);GO:0007399(nervous system development);GO:0007416(synapse assembly);GO:0016020(membrane);GO:0016021(integral component of membrane);GO:0016339(c…	NA	protocadherin beta 2 [Source:HGNC Symbol;Acc:HGNC:8687]	protein_coding	0.62789	0.456799	0.367398	0.643007	1.50344	1.53691	0.394229	-1.3429	0.00321134	down	yes
ENSG00000214900	LINC01588	ENST00000533506;ENST00000556130;ENST00000557142;ENST00000554129;ENST00000603228;ENST00000553463;ENST00000530176;ENST00000529902;ENST00000556019;ENST00000556913;ENST00000528300;ENST00000603474;ENST00000399206;ENST00000635379;ENST00000553914;ENST00000556434;ENST00000623502	NA	NA	long intergenic non-protein coding RNA 1588 [Source:HGNC Symbol;Acc:HGNC:27503]	lincRNA	0.0536063	0.0310958	0.0445084	0.160103	0.0803301	0.087819	0.393632	-1.34508	0.0083518	down	yes
ENSG00000197753	LHFPL5	ENST00000652718;ENST00000360215;ENST00000651994;ENST00000651132;ENST00000645222;ENST00000496656;ENST00000651676	GO:0005515(protein binding);GO:0005886(plasma membrane);GO:0006811(ion transport);GO:0007605(sensory perception of sound);GO:0016020(membrane);GO:0016021(integral component of membrane);GO:0016324(apical plasma membrane);GO:0032421(stereocilium bundle);GO:0032426(stereocilium tip);GO:0050910(detection of mechanical stimulus involved in sensory perception of sound);GO:0060088(auditory receptor cel…	NA	LHFPL tetraspan subfamily member 5 [Source:HGNC Symbol;Acc:HGNC:21253]	protein_coding;nonsense_mediated_decay;processed_transcript	0.141181	0.11543	0.0797739	0.247575	0.356996	0.254072	0.391763	-1.35195	0.00444374	down	yes
ENSG00000134897	BIVM	ENST00000257336;ENST00000651808;ENST00000490317;ENST00000652643;ENST00000491929;ENST00000474443;ENST00000651228;ENST00000481069;ENST00000448849;ENST00000652084;ENST00000652006;ENST00000652766;ENST00000651855;ENST00000651008;ENST00000651949;ENST00000651048	GO:0005615(extracellular space);GO:0005634(nucleus);GO:0005737(cytoplasm);GO:0005737(cytoplasm)	NA	basic, immunoglobulin-like variable motif containing [Source:HGNC Symbol;Acc:HGNC:16034]	protein_coding;nonsense_mediated_decay;retained_intron;processed_transcript	0.616919	0.144836	0.587731	0.856852	1.37435	1.26841	0.38561	-1.37478	0.00393621	down	yes
ENSG00000254004	ZNF260	ENST00000523638;ENST00000593142;ENST00000588993;ENST00000520608;ENST00000592282	GO:0000981(DNA-binding transcription factor activity, RNA polymerase II-specific);GO:0003676(nucleic acid binding);GO:0003677(DNA binding);GO:0005515(protein binding);GO:0005634(nucleus);GO:0005654(nucleoplasm);GO:0005829(cytosol);GO:0006357(regulation of transcription by RNA polymerase II);GO:0007275(multicellular organism development);GO:0046872(metal ion binding);GO:0046872(metal ion binding)	NA	zinc finger protein 260 [Source:HGNC Symbol;Acc:HGNC:13499]	protein_coding;retained_intron	1.39403	1.18681	0.51261	3.5232	3.29471	1.20592	0.385533	-1.37507	0.0030231	down	yes
ENSG00000268713	AC005261	ENST00000600047	NA	NA	novel transcript	lincRNA	0.526138	0.097871	1.04979	1.06177	1.52076	1.78983	0.382815	-1.38528	0.0323594	down	yes
ENSG00000184588	PDE4B	ENST00000371045;ENST00000491340;ENST00000371048;ENST00000480109;ENST00000329654;ENST00000526197;ENST00000531358;ENST00000341517;ENST00000490695;ENST00000483863;ENST00000534463;ENST00000423207;ENST00000528771;ENST00000524999;ENST00000531025;ENST00000412480;ENST00000532040;ENST00000526666	GO:0000930(gamma-tubulin complex);GO:0001780(neutrophil homeostasis);GO:0004114(3',5'-cyclic-nucleotide phosphodiesterase activity);GO:0004115(3',5'-cyclic-AMP phosphodiesterase activity);GO:0005515(protein binding);GO:0005813(centrosome);GO:0005829(cytosol);GO:0005891(voltage-gated calcium channel complex);GO:0006198(cAMP catabolic process);GO:0007165(signal transduction);GO:0007186(G protein-co…	00230(Purine metabolism);04024(cAMP signaling pathway);04928(Parathyroid hormone synthesis, secretion and action);05032(Morphine addiction);05032(Morphine addiction)	phosphodiesterase 4B [Source:HGNC Symbol;Acc:HGNC:8781]	protein_coding;processed_transcript;retained_intron	0.0555733	0.090271	0.0694323	0.181115	0.156302	0.225144	0.382673	-1.38582	0.00466401	down	yes
ENSG00000070182	SPTB	ENST00000389720;ENST00000553938;ENST00000556227;ENST00000389721;ENST00000644917;ENST00000556626;ENST00000542694;ENST00000389722;ENST00000342835	GO:0000165(MAPK cascade);GO:0003779(actin binding);GO:0005200(structural constituent of cytoskeleton);GO:0005515(protein binding);GO:0005543(phospholipid binding);GO:0005737(cytoplasm);GO:0005794(Golgi apparatus);GO:0005829(cytosol);GO:0005856(cytoskeleton);GO:0005938(cell cortex);GO:0006888(endoplasmic reticulum to Golgi vesicle-mediated transport);GO:0007010(cytoskeleton organization);GO:000741…	NA	spectrin beta, erythrocytic [Source:HGNC Symbol;Acc:HGNC:11274]	protein_coding;retained_intron;processed_transcript	0.349899	0.293241	0.280372	0.787208	0.879946	0.778989	0.377538	-1.40531	1.10478e-05	down	yes
ENSG00000197406	DIO3	ENST00000510508	GO:0004800(thyroxine 5'-deiodinase activity);GO:0005768(endosome);GO:0005886(plasma membrane);GO:0006590(thyroid hormone generation);GO:0006915(apoptotic process);GO:0008150(biological_process);GO:0010008(endosome membrane);GO:0016020(membrane);GO:0016021(integral component of membrane);GO:0016491(oxidoreductase activity);GO:0033798(thyroxine 5-deiodinase activity);GO:0040018(positive regulation …	04919(Thyroid hormone signaling pathway)	iodothyronine deiodinase 3 [Source:HGNC Symbol;Acc:HGNC:2885]	protein_coding	0.195567	0.186317	0.203586	0.552768	0.524903	0.473939	0.377331	-1.4061	0.00488893	down	yes
ENSG00000219545	UMAD1	ENST00000639343;ENST00000638342;ENST00000406829;ENST00000636849;ENST00000639110;ENST00000493246;ENST00000471760;ENST00000482067;ENST00000463725	NA	NA	UBAP1-MVB12-associated (UMA) domain containing 1 [Source:HGNC Symbol;Acc:HGNC:48955]	nonsense_mediated_decay;processed_transcript;protein_coding	0.611009	0.574616	0.779459	1.44929	3.14329	0.639964	0.375551	-1.41292	0.00638453	down	yes
ENSG00000164171	ITGA2	ENST00000296585;ENST00000509814;ENST00000509960;ENST00000513685;ENST00000503810;ENST00000510722	GO:0001540(amyloid-beta binding);GO:0001618(virus receptor activity);GO:0001666(response to hypoxia);GO:0002687(positive regulation of leukocyte migration);GO:0005178(integrin binding);GO:0005515(protein binding);GO:0005518(collagen binding);GO:0005634(nucleus);GO:0005886(plasma membrane);GO:0005925(focal adhesion);GO:0006929(substrate-dependent cell migration);GO:0006971(hypotonic response);GO:0…	04145(Phagosome);04151(PI3K-Akt signaling pathway);04510(Focal adhesion);04512(ECM-receptor interaction);04611(Platelet activation);04640(Hematopoietic cell lineage);04810(Regulation of actin cytoskeleton);05165(Human papillomavirus infection);05200(Pathways in cancer);05205(Proteoglycans in cancer);05222(Small cell lung cancer);05410(Hypertrophic cardiomyopathy (HCM));05412(Arrhythmogenic right …	integrin subunit alpha 2 [Source:HGNC Symbol;Acc:HGNC:6137]	protein_coding;nonsense_mediated_decay	11.3199	7.57424	5.37917	21.7382	21.6733	21.2359	0.375472	-1.41322	2.76316e-09	down	yes
ENSG00000131620	ANO1	ENST00000355303;ENST00000531349;ENST00000530480;ENST00000529636;ENST00000525494;ENST00000531604;ENST00000529913;ENST00000530676;ENST00000531300;ENST00000316296	GO:0005227(calcium activated cation channel activity);GO:0005229(intracellular calcium activated chloride channel activity);GO:0005247(voltage-gated chloride channel activity);GO:0005254(chloride channel activity);GO:0005515(protein binding);GO:0005737(cytoplasm);GO:0005886(plasma membrane);GO:0006811(ion transport);GO:0006812(cation transport);GO:0006821(chloride transport);GO:0007200(phospholip…	NA	anoctamin 1 [Source:HGNC Symbol;Acc:HGNC:21625]	protein_coding;retained_intron;processed_transcript	0.0645779	0.237191	0.254656	0.463473	0.634806	0.409806	0.368961	-1.43846	0.00887903	down	yes
ENSG00000085276	MECOM	ENST00000464456;ENST00000433243;ENST00000472280;ENST00000484519;ENST00000486748;ENST00000651503;ENST00000461430;ENST00000494597;ENST00000494292;ENST00000475754;ENST00000468789;ENST00000466623;ENST00000628990;ENST00000264674;ENST00000460814;ENST00000487503;ENST00000481315;ENST00000485957;ENST00000492586;ENST00000460890	GO:0000118(histone deacetylase complex);GO:0000981(DNA-binding transcription factor activity, RNA polymerase II-specific);GO:0003676(nucleic acid binding);GO:0003677(DNA binding);GO:0003700(DNA-binding transcription factor activity);GO:0005515(protein binding);GO:0005634(nucleus);GO:0005654(nucleoplasm);GO:0005829(cytosol);GO:0006355(regulation of transcription, DNA-templated);GO:0006357(regulati…	04010(MAPK signaling pathway);05200(Pathways in cancer);05220(Chronic myeloid leukemia);05220(Chronic myeloid leukemia)	MDS1 and EVI1 complex locus [Source:HGNC Symbol;Acc:HGNC:3498]	protein_coding;retained_intron;processed_transcript	0.04467	0.0212034	0.0752681	0.100862	0.105649	0.177342	0.367697	-1.44341	0.0124946	down	yes
ENSG00000162641	AKNAD1	ENST00000466413;ENST00000474186;ENST00000461774;ENST00000369994;ENST00000477908;ENST00000472781;ENST00000603450;ENST00000370001;ENST00000369995	NA	NA	AKNA domain containing 1 [Source:HGNC Symbol;Acc:HGNC:28398]	retained_intron;nonsense_mediated_decay;protein_coding;processed_transcript	0.0715353	0.0884452	0.0835811	0.290861	0.267972	0.104839	0.366991	-1.44618	0.0109207	down	yes
ENSG00000232931	LINC00342	ENST00000448494;ENST00000412393	NA	NA	long intergenic non-protein coding RNA 342 [Source:HGNC Symbol;Acc:HGNC:42470]	lincRNA	0.574164	0.0529285	0.696599	0.794991	1.45229	1.42293	0.360659	-1.47129	0.0280578	down	yes
ENSG00000251562	MALAT1	ENST00000534336;ENST00000508832;ENST00000620465;ENST00000618227;ENST00000610851;ENST00000620902;ENST00000612781;ENST00000618925;ENST00000619449;ENST00000610481;ENST00000618132;ENST00000616691;ENST00000544868;ENST00000613376;ENST00000617489;ENST00000617791;ENST00000616527	NA	NA	metastasis associated lung adenocarcinoma transcript 1 [Source:HGNC Symbol;Acc:HGNC:29665]	lincRNA	2.40664	1.87871	4.8504	14.001	6.38299	5.14897	0.357802	-1.48277	9.18211e-05	down	yes
ENSG00000227640	SOX21-AS1	ENST00000438290	NA	NA	SOX21 antisense divergent transcript 1 [Source:HGNC Symbol;Acc:HGNC:39807]	lincRNA	0.334501	0.135918	0.178525	0.619242	0.689267	0.515807	0.355719	-1.49119	0.00266975	down	yes
ENSG00000223839	FAM95B1	ENST00000455995;ENST00000593047;ENST00000589112;ENST00000590254;ENST00000586172;ENST00000590863;ENST00000586842;ENST00000586273;ENST00000593216;ENST00000592873;ENST00000588217;ENST00000585417;ENST00000592053;ENST00000591605	NA	NA	family with sequence similarity 95 member B1 [Source:HGNC Symbol;Acc:HGNC:32318]	lincRNA	0.0630304	0.0699842	0.0742051	0.218895	0.138105	0.228692	0.353803	-1.49898	0.00238018	down	yes
ENSG00000168461	RAB31	ENST00000578921;ENST00000578734;ENST00000581109;ENST00000583137;ENST00000580795;ENST00000577796;ENST00000577371;ENST00000580361;ENST00000577284;ENST00000583921;ENST00000578737;ENST00000435762	GO:0000166(nucleotide binding);GO:0001891(phagocytic cup);GO:0003924(GTPase activity);GO:0005515(protein binding);GO:0005525(GTP binding);GO:0005768(endosome);GO:0005769(early endosome);GO:0005794(Golgi apparatus);GO:0005829(cytosol);GO:0005886(plasma membrane);GO:0006886(intracellular protein transport);GO:0016020(membrane);GO:0019003(GDP binding);GO:0030667(secretory granule membrane);GO:003067…	04144(Endocytosis);04144(Endocytosis)	RAB31, member RAS oncogene family [Source:HGNC Symbol;Acc:HGNC:9771]	protein_coding;nonsense_mediated_decay;processed_transcript;retained_intron	3.80579	6.09276	3.91522	6.52086	28.8503	3.898	0.351772	-1.50729	0.00600107	down	yes
ENSG00000184564	SLITRK6	ENST00000400286;ENST00000647374;ENST00000645642;ENST00000643778	GO:0001964(startle response);GO:0002088(lens development in camera-type eye);GO:0002093(auditory receptor cell morphogenesis);GO:0005515(protein binding);GO:0005886(plasma membrane);GO:0005887(integral component of plasma membrane);GO:0007409(axonogenesis);GO:0007416(synapse assembly);GO:0007601(visual perception);GO:0007605(sensory perception of sound);GO:0008344(adult locomotory behavior);GO:00…	NA	SLIT and NTRK like family member 6 [Source:HGNC Symbol;Acc:HGNC:23503]	protein_coding;processed_transcript	0.924194	0.436513	1.10341	2.25603	1.92906	2.85873	0.349826	-1.51529	0.000125911	down	yes
ENSG00000210077	MT-TV	ENST00000387342	NA	NA	mitochondrially encoded tRNA-Val (GUN) [Source:HGNC Symbol;Acc:HGNC:7500]	Mt_tRNA	9.62881	17.5433	24.5827	44.0732	48.2304	55.9188	0.34917	-1.518	0.00141403	down	yes
ENSG00000149922	TBX6	ENST00000627355;ENST00000553607;ENST00000279386;ENST00000567664;ENST00000395224	GO:0000122(negative regulation of transcription by RNA polymerase II);GO:0000790(nuclear chromatin);GO:0000980(RNA polymerase II distal enhancer sequence-specific DNA binding);GO:0000981(DNA-binding transcription factor activity, RNA polymerase II-specific);GO:0001085(RNA polymerase II transcription factor binding);GO:0001102(RNA polymerase II activating transcription factor binding);GO:0001707(m…	NA	T-box 6 [Source:HGNC Symbol;Acc:HGNC:11605]	protein_coding;nonsense_mediated_decay	0.0353797	0.199952	0.128952	0.363158	0.409352	0.281357	0.345664	-1.53256	0.016167	down	yes
ENSG00000273151	AC073957	ENST00000609998	NA	NA	novel transcript, antisense to GET4	antisense	0.077646	0.134301	0.031406	0.204352	0.184496	0.3377	0.334944	-1.57801	0.00919914	down	yes
ENSG00000231609	AC007098	ENST00000429952;ENST00000650490;ENST00000412297;ENST00000413549;ENST00000437346	NA	NA	novel transcript, antisense to EHBP1	antisense	0.020765	0.154305	0.151793	0.366356	0.12239	0.502411	0.329779	-1.60043	0.0317193	down	yes
ENSG00000278224	PRICKLE4	ENST00000359201;ENST00000458694;ENST00000394263;ENST00000394260;ENST00000463606;ENST00000394259;ENST00000483200	GO:0003674(molecular_function);GO:0005634(nucleus);GO:0008150(biological_process);GO:0008270(zinc ion binding);GO:0046872(metal ion binding);GO:0046872(metal ion binding)	04310(Wnt signaling pathway);04310(Wnt signaling pathway)	prickle planar cell polarity protein 4 [Source:HGNC Symbol;Acc:HGNC:16805]	protein_coding;processed_transcript	0.200402	0.0443275	0.234823	0.546528	0.605415	0.311381	0.327715	-1.60949	0.00940568	down	yes
ENSG00000234420	ZNF37BP	ENST00000452075;ENST00000452306;ENST00000435805;ENST00000473592	NA	NA	zinc finger protein 37B, pseudogene [Source:HGNC Symbol;Acc:HGNC:13103]	processed_transcript;transcribed_processed_pseudogene	0.248501	0.0415577	0.153038	0.537026	0.404612	0.437168	0.321362	-1.63773	0.00228034	down	yes
ENSG00000002079	MYH16	ENST00000439784;ENST00000425880;ENST00000452010;ENST00000453194;ENST00000429079	NA	NA	myosin heavy chain 16 pseudogene [Source:HGNC Symbol;Acc:HGNC:31038]	transcribed_unitary_pseudogene;processed_transcript;retained_intron	0.0686606	0.102932	0.0678205	0.269053	0.296449	0.210176	0.30865	-1.69596	0.000867994	down	yes
ENSG00000185862	EVI2B	ENST00000330927;ENST00000577894	GO:0005887(integral component of plasma membrane);GO:0016020(membrane);GO:0016021(integral component of membrane);GO:0030854(positive regulation of granulocyte differentiation);GO:0043066(negative regulation of apoptotic process);GO:0045660(positive regulation of neutrophil differentiation);GO:0061515(myeloid cell development);GO:0071157(negative regulation of cell cycle arrest);GO:2000035(regula…	NA	ecotropic viral integration site 2B [Source:HGNC Symbol;Acc:HGNC:3500]	protein_coding	0.107805	0.0968356	0.208688	0.406778	0.394533	0.538399	0.308521	-1.69656	0.00254192	down	yes
ENSG00000067798	NAV3	ENST00000397909;ENST00000552895;ENST00000549464;ENST00000548948;ENST00000552300;ENST00000644176;ENST00000550788;ENST00000551277;ENST00000551162;ENST00000550673;ENST00000547884;ENST00000550042;ENST00000550503;ENST00000547725;ENST00000536525;ENST00000549369	GO:0005515(protein binding);GO:0005524(ATP binding);GO:0005634(nucleus);GO:0005640(nuclear outer membrane);GO:0007026(negative regulation of microtubule depolymerization);GO:0007399(nervous system development);GO:0008017(microtubule binding);GO:0016020(membrane);GO:0022008(neurogenesis);GO:0030336(negative regulation of cell migration);GO:0031116(positive regulation of microtubule polymerization)…	NA	neuron navigator 3 [Source:HGNC Symbol;Acc:HGNC:15998]	protein_coding;retained_intron;processed_transcript	0.0858418	0.120266	0.130413	0.371025	0.386488	0.342666	0.305878	-1.70897	1.80095e-05	down	yes
ENSG00000174721	FGFBP3	ENST00000311575	GO:0005576(extracellular region);GO:0007267(cell-cell signaling);GO:0008201(heparin binding);GO:0017134(fibroblast growth factor binding);GO:0019838(growth factor binding);GO:0043117(positive regulation of vascular permeability);GO:0045743(positive regulation of fibroblast growth factor receptor signaling pathway);GO:0062023(collagen-containing extracellular matrix)	NA	fibroblast growth factor binding protein 3 [Source:HGNC Symbol;Acc:HGNC:23428]	protein_coding	0.178624	0.096538	0.104207	0.405884	0.422573	0.415796	0.304897	-1.71361	0.00114919	down	yes
ENSG00000286207	AC012443	ENST00000650944	NA	NA	novel transcript, antisense to FMNL2	antisense	0.023999	0.086848	0.083849	0.216661	0.241515	0.187497	0.30154	-1.72958	0.00309066	down	yes
ENSG00000162433	AK4	ENST00000327299;ENST00000545314;ENST00000474968;ENST00000470888;ENST00000479060;ENST00000497030;ENST00000546702;ENST00000395334	GO:0000166(nucleotide binding);GO:0001889(liver development);GO:0004017(adenylate kinase activity);GO:0004550(nucleoside diphosphate kinase activity);GO:0005524(ATP binding);GO:0005525(GTP binding);GO:0005739(mitochondrion);GO:0005759(mitochondrial matrix);GO:0006139(nucleobase-containing compound metabolic process);GO:0006165(nucleoside diphosphate phosphorylation);GO:0006172(ADP biosynthetic pr…	00230(Purine metabolism);00730(Thiamine metabolism);00730(Thiamine metabolism)	adenylate kinase 4 [Source:HGNC Symbol;Acc:HGNC:363]	protein_coding;processed_transcript	3.96262	4.37171	3.94707	15.6526	14.2946	11.1621	0.29875	-1.74299	2.4243e-18	down	yes
ENSG00000114857	NKTR	ENST00000232978;ENST00000468735;ENST00000498730;ENST00000465584;ENST00000429888;ENST00000460807;ENST00000490189;ENST00000508351;ENST00000464315;ENST00000445842;ENST00000460910;ENST00000466553;ENST00000617821;ENST00000478488;ENST00000472258;ENST00000459950;ENST00000472127;ENST00000442970;ENST00000487466	GO:0000413(protein peptidyl-prolyl isomerization);GO:0003755(peptidyl-prolyl cis-trans isomerase activity);GO:0005654(nucleoplasm);GO:0005739(mitochondrion);GO:0005829(cytosol);GO:0005886(plasma membrane);GO:0006457(protein folding);GO:0016018(cyclosporin A binding);GO:0016020(membrane);GO:0016853(isomerase activity);GO:0042026(protein refolding);GO:0051082(unfolded protein binding);GO:0051082(un…	NA	natural killer cell triggering receptor [Source:HGNC Symbol;Acc:HGNC:7833]	protein_coding;retained_intron;nonsense_mediated_decay;processed_transcript	0.184258	0.312975	0.239998	1.56537	0.451836	0.470571	0.296341	-1.75467	0.000284044	down	yes
ENSG00000134899	ERCC5	ENST00000651002;ENST00000355739;ENST00000375958;ENST00000651281;ENST00000651387;ENST00000651055;ENST00000375954;ENST00000652613;ENST00000602836;ENST00000651470;ENST00000472247;ENST00000481099;ENST00000472151;ENST00000535557;ENST00000652225	GO:0000109(nucleotide-excision repair complex);GO:0000405(bubble DNA binding);GO:0000993(RNA polymerase II complex binding);GO:0003677(DNA binding);GO:0003690(double-stranded DNA binding);GO:0003697(single-stranded DNA binding);GO:0003824(catalytic activity);GO:0004518(nuclease activity);GO:0004519(endonuclease activity);GO:0004520(endodeoxyribonuclease activity);GO:0005515(protein binding);GO:00…	03420(Nucleotide excision repair);03420(Nucleotide excision repair)	ERCC excision repair 5, endonuclease [Source:HGNC Symbol;Acc:HGNC:3437]	nonsense_mediated_decay;protein_coding;retained_intron;processed_transcript	1.36976	0.330092	0.472734	1.28943	2.99844	3.10041	0.294059	-1.76582	0.000226206	down	yes
ENSG00000228492	RAB11FIP1P1	ENST00000438337	NA	NA	RAB11 family interacting protein 1 pseudogene 1 [Source:HGNC Symbol;Acc:HGNC:42366]	processed_pseudogene	0.0001	0.088457	0.383725	0.441129	0.620898	0.567442	0.289838	-1.78668	0.0391758	down	yes
ENSG00000145416	MARCH1	ENST00000274056;ENST00000511245;ENST00000510786;ENST00000339875;ENST00000512214;ENST00000505391;ENST00000508725;ENST00000503104;ENST00000510075;ENST00000515471;ENST00000514618;ENST00000505517;ENST00000507270;ENST00000510696;ENST00000503008	GO:0000209(protein polyubiquitination);GO:0002376(immune system process);GO:0002495(antigen processing and presentation of peptide antigen via MHC class II);GO:0004842(ubiquitin-protein transferase activity);GO:0005764(lysosome);GO:0005765(lysosomal membrane);GO:0005768(endosome);GO:0005789(endoplasmic reticulum membrane);GO:0005794(Golgi apparatus);GO:0005886(plasma membrane);GO:0006955(immune r…	NA	membrane associated ring-CH-type finger 1 [Source:HGNC Symbol;Acc:HGNC:26077]	protein_coding;retained_intron;nonsense_mediated_decay;processed_transcript	0.0490101	0.00303448	0.0756712	0.106692	0.143359	0.193622	0.28786	-1.79656	0.0129468	down	yes
ENSG00000251259	AC004069	ENST00000504082	NA	NA	novel transcript	lincRNA	0.0001	0.880132	0.646018	2.00593	1.04366	2.45093	0.277474	-1.84958	0.0314291	down	yes
ENSG00000177570	SAMD12	ENST00000409003;ENST00000453675;ENST00000648422;ENST00000524796;ENST00000649198;ENST00000526328;ENST00000314727;ENST00000445741;ENST00000649630;ENST00000526765	GO:0005515(protein binding);GO:0005515(protein binding)	NA	sterile alpha motif domain containing 12 [Source:HGNC Symbol;Acc:HGNC:31750]	protein_coding;processed_transcript;nonsense_mediated_decay	0.134404	0.247488	0.0586348	0.582461	0.663237	0.385377	0.270084	-1.88852	0.000205216	down	yes
ENSG00000254221	PCDHGB1	ENST00000611598;ENST00000523390	GO:0005509(calcium ion binding);GO:0005886(plasma membrane);GO:0005887(integral component of plasma membrane);GO:0007155(cell adhesion);GO:0007156(homophilic cell adhesion via plasma membrane adhesion molecules);GO:0016020(membrane);GO:0016021(integral component of membrane);GO:0030426(growth cone);GO:0030426(growth cone)	NA	protocadherin gamma subfamily B, 1 [Source:HGNC Symbol;Acc:HGNC:8708]	protein_coding	0.190596	0.216055	0.212586	0.148966	1.87906	0.295449	0.266514	-1.90772	0.0110375	down	yes
ENSG00000228727	SAPCD1	ENST00000494299;ENST00000415669;ENST00000425424	NA	NA	suppressor APC domain containing 1 [Source:HGNC Symbol;Acc:HGNC:13938]	retained_intron;protein_coding	0.0336697	0.27497	0.367543	0.487566	1.1835	0.880115	0.265047	-1.91568	0.00652097	down	yes
ENSG00000271793	AL589666	ENST00000503906	NA	NA	novel protein, SYNCRIP-SNX14 readthrough	nonsense_mediated_decay	0.622753	0.614957	0.822385	1.32406	2.93421	3.91984	0.251903	-1.98906	0.000179402	down	yes
ENSG00000279809	AC005538	ENST00000623215	NA	NA	novel transcript	TEC	0.425548	0.855963	0.543857	0.921372	1.80017	4.7712	0.243618	-2.03731	0.000623549	down	yes
ENSG00000153165	RGPD3	ENST00000409886;ENST00000304514	GO:0005096(GTPase activator activity);GO:0005515(protein binding);GO:0005623(cell);GO:0005634(nucleus);GO:0005643(nuclear pore);GO:0005737(cytoplasm);GO:0006607(NLS-bearing protein import into nucleus);GO:0008536(Ran GTPase binding);GO:0043547(positive regulation of GTPase activity);GO:0046907(intracellular transport);GO:0046907(intracellular transport)	NA	RANBP2-like and GRIP domain containing 3 [Source:HGNC Symbol;Acc:HGNC:32416]	protein_coding	0.0277614	0.0437126	0.0582937	0.0951826	0.243851	0.209964	0.236372	-2.08087	0.000472073	down	yes
ENSG00000164125	GASK1B	ENST00000296530;ENST00000593260;ENST00000592586;ENST00000590648;ENST00000393807;ENST00000592057;ENST00000585682;ENST00000587787;ENST00000589306	GO:0000139(Golgi membrane);GO:0005794(Golgi apparatus);GO:0016020(membrane);GO:0016021(integral component of membrane);GO:0016021(integral component of membrane)	NA	golgi associated kinase 1B [Source:HGNC Symbol;Acc:HGNC:25312]	protein_coding;processed_transcript	0.102211	0.0557853	0.0870525	0.234695	0.396606	0.415471	0.234099	-2.09481	1.83384e-05	down	yes
ENSG00000241360	PDXP	ENST00000215904;ENST00000403251	GO:0000287(magnesium ion binding);GO:0004647(phosphoserine phosphatase activity);GO:0004721(phosphoprotein phosphatase activity);GO:0005515(protein binding);GO:0005737(cytoplasm);GO:0005829(cytosol);GO:0005856(cytoskeleton);GO:0005886(plasma membrane);GO:0005911(cell-cell junction);GO:0006470(protein dephosphorylation);GO:0007088(regulation of mitotic nuclear division);GO:0015629(actin cytoskelet…	00750(Vitamin B6 metabolism);00750(Vitamin B6 metabolism)	pyridoxal phosphatase [Source:HGNC Symbol;Acc:HGNC:30259]	protein_coding	4.14944	3.79571	4.00199	17.9358	17.498	18.377	0.222021	-2.17123	7.64949e-22	down	yes
ENSG00000234857	HNRNPUL2-BSCL2	ENST00000403734	NA	NA	HNRNPUL2-BSCL2 readthrough (NMD candidate) [Source:HGNC Symbol;Acc:HGNC:49189]	nonsense_mediated_decay	0.813267	0.213876	0.851011	0.477319	0.41486	7.86977	0.214353	-2.22194	0.0125383	down	yes
ENSG00000273173	SNURF	ENST00000577949;ENST00000580062;ENST00000338327	GO:0003674(molecular_function);GO:0005634(nucleus);GO:0008150(biological_process);GO:0016607(nuclear speck);GO:0016607(nuclear speck)	NA	SNRPN upstream reading frame [Source:HGNC Symbol;Acc:HGNC:11171]	protein_coding;nonsense_mediated_decay	1.52334	0.724833	0.747033	9.20757	4.08708	0.811308	0.212336	-2.23558	0.000987203	down	yes
ENSG00000114120	SLC25A36	ENST00000446041;ENST00000324194;ENST00000648615;ENST00000514629;ENST00000511757;ENST00000502866;ENST00000507429;ENST00000512506;ENST00000502594;ENST00000513887;ENST00000502756;ENST00000512023;ENST00000515813;ENST00000631654;ENST00000393015;ENST00000453248	GO:0000002(mitochondrial genome maintenance);GO:0005739(mitochondrion);GO:0005743(mitochondrial inner membrane);GO:0006864(pyrimidine nucleotide transport);GO:0007005(mitochondrion organization);GO:0015218(pyrimidine nucleotide transmembrane transporter activity);GO:0016020(membrane);GO:0016021(integral component of membrane);GO:0022857(transmembrane transporter activity);GO:0051881(regulation of…	NA	solute carrier family 25 member 36 [Source:HGNC Symbol;Acc:HGNC:25554]	protein_coding;nonsense_mediated_decay;retained_intron;processed_transcript	0.966054	0.445897	0.795945	3.52308	3.38792	3.5111	0.211847	-2.2389	6.07103e-15	down	yes
ENSG00000104951	IL4I1	ENST00000595948;ENST00000596011;ENST00000597295;ENST00000601717;ENST00000596022;ENST00000391826;ENST00000593956;ENST00000341114	GO:0001716(L-amino-acid oxidase activity);GO:0005576(extracellular region);GO:0005764(lysosome);GO:0006559(L-phenylalanine catabolic process);GO:0009063(cellular amino acid catabolic process);GO:0016491(oxidoreductase activity);GO:0055114(oxidation-reduction process);GO:0055114(oxidation-reduction process)	00250(Alanine, aspartate and glutamate metabolism);00270(Cysteine and methionine metabolism);00280(Valine, leucine and isoleucine degradation);00350(Tyrosine metabolism);00360(Phenylalanine metabolism);00380(Tryptophan metabolism);00400(Phenylalanine, tyrosine and tryptophan biosynthesis);00400(Phenylalanine, tyrosine and tryptophan biosynthesis)	interleukin 4 induced 1 [Source:HGNC Symbol;Acc:HGNC:19094]	protein_coding;nonsense_mediated_decay	0.197921	0.0090318	0.0001	0.375724	0.243978	0.377728	0.207586	-2.26822	0.0190695	down	yes
ENSG00000153993	SEMA3D	ENST00000284136;ENST00000444867;ENST00000484038;ENST00000463315	GO:0001755(neural crest cell migration);GO:0005515(protein binding);GO:0005576(extracellular region);GO:0005615(extracellular space);GO:0005887(integral component of plasma membrane);GO:0007275(multicellular organism development);GO:0007399(nervous system development);GO:0016020(membrane);GO:0016021(integral component of membrane);GO:0030154(cell differentiation);GO:0030215(semaphorin receptor bi…	04360(Axon guidance);04360(Axon guidance)	semaphorin 3D [Source:HGNC Symbol;Acc:HGNC:10726]	protein_coding;processed_transcript;retained_intron	0.0482293	0.0240513	0.0001	0.156797	0.123528	0.0725006	0.205145	-2.28528	0.00531674	down	yes
ENSG00000188629	ZNF177	ENST00000434737;ENST00000343499;ENST00000590616;ENST00000589262;ENST00000602856;ENST00000592912	GO:0000122(negative regulation of transcription by RNA polymerase II);GO:0000981(DNA-binding transcription factor activity, RNA polymerase II-specific);GO:0003676(nucleic acid binding);GO:0003677(DNA binding);GO:0005515(protein binding);GO:0005622(intracellular);GO:0005634(nucleus);GO:0006355(regulation of transcription, DNA-templated);GO:0046872(metal ion binding);GO:0072562(blood microparticle)…	05168(Herpes simplex virus 1 infection);05168(Herpes simplex virus 1 infection)	zinc finger protein 177 [Source:HGNC Symbol;Acc:HGNC:12966]	protein_coding	0.0001	0.144873	0.0989014	0.36894	0.330534	0.514391	0.200908	-2.31539	0.00525729	down	yes
ENSG00000182648	LINC01006	ENST00000333319;ENST00000458645;ENST00000426187;ENST00000624071;ENST00000440711;ENST00000447933;ENST00000418309;ENST00000436670;ENST00000435354;ENST00000651649;ENST00000425712;ENST00000652322	NA	NA	long intergenic non-protein coding RNA 1006 [Source:HGNC Symbol;Acc:HGNC:48971]	lincRNA	0.036047	0.0244613	0.0378558	0.177251	0.314967	0.0348499	0.186625	-2.42178	0.0007131	down	yes
ENSG00000256667	KLRA1P	ENST00000535939;ENST00000503499;ENST00000510134	NA	NA	killer cell lectin like receptor A1, pseudogene [Source:HGNC Symbol;Acc:HGNC:6372]	processed_transcript;transcribed_unprocessed_pseudogene	0.0226078	0.0787762	0.196509	0.778031	0.482469	0.396377	0.179792	-2.4756	0.000277114	down	yes
ENSG00000283761	AC118553	ENST00000638792;ENST00000638968;ENST00000640357;ENST00000639171;ENST00000640238;ENST00000638779;ENST00000639040;ENST00000639037	GO:0000139(Golgi membrane);GO:0005215(transporter activity);GO:0015165(pyrimidine nucleotide-sugar transmembrane transporter activity);GO:0016020(membrane);GO:0016021(integral component of membrane);GO:0055085(transmembrane transport);GO:0090481(pyrimidine nucleotide-sugar transmembrane transport);GO:0090481(pyrimidine nucleotide-sugar transmembrane transport)	NA	novel protein	protein_coding;nonsense_mediated_decay	0.0146129	0.0204406	0.447035	0.0491354	0.501724	2.14281	0.178971	-2.4822	0.0309387	down	yes
ENSG00000164520	RAET1E	ENST00000524905;ENST00000531073;ENST00000529948;ENST00000357183;ENST00000367363;ENST00000392270;ENST00000532335	GO:0001913(T cell mediated cytotoxicity);GO:0002376(immune system process);GO:0005515(protein binding);GO:0005576(extracellular region);GO:0005615(extracellular space);GO:0005886(plasma membrane);GO:0006955(immune response);GO:0009897(external side of plasma membrane);GO:0016020(membrane);GO:0016021(integral component of membrane);GO:0030101(natural killer cell activation);GO:0042267(natural kill…	04650(Natural killer cell mediated cytotoxicity);04650(Natural killer cell mediated cytotoxicity)	retinoic acid early transcript 1E [Source:HGNC Symbol;Acc:HGNC:16793]	processed_transcript;protein_coding;nonsense_mediated_decay	0.0558995	0.0345915	0.0908761	0.279992	0.677187	0.154214	0.163189	-2.61538	9.43089e-05	down	yes
ENSG00000126561	STAT5A	ENST00000345506;ENST00000444283;ENST00000591556;ENST00000468096;ENST00000546010;ENST00000587646;ENST00000588868;ENST00000479417;ENST00000478897;ENST00000469124;ENST00000590726;ENST00000590949	GO:0000981(DNA-binding transcription factor activity, RNA polymerase II-specific);GO:0001938(positive regulation of endothelial cell proliferation);GO:0003677(DNA binding);GO:0003700(DNA-binding transcription factor activity);GO:0005515(protein binding);GO:0005634(nucleus);GO:0005654(nucleoplasm);GO:0005737(cytoplasm);GO:0005829(cytosol);GO:0006355(regulation of transcription, DNA-templated);GO:0…	04012(ErbB signaling pathway);04217(Necroptosis);04630(Jak-STAT signaling pathway);04658(Th1 and Th2 cell differentiation);04659(Th17 cell differentiation);04917(Prolactin signaling pathway);04933(AGE-RAGE signaling pathway in diabetic complications);05161(Hepatitis B);05162(Measles);05166(Human T-cell leukemia virus 1 infection);05200(Pathways in cancer);05203(Viral carcinogenesis);05220(Chronic…	signal transducer and activator of transcription 5A [Source:HGNC Symbol;Acc:HGNC:11366]	protein_coding;retained_intron	0.0423799	0.0170919	0.00940479	0.0230725	0.323934	0.169089	0.133457	-2.90555	0.000758278	down	yes
ENSG00000255508	AP002990	ENST00000496634;ENST00000526409;ENST00000534745	GO:0003676(nucleic acid binding);GO:0003723(RNA binding);GO:0003730(mRNA 3'-UTR binding);GO:0005634(nucleus);GO:0006378(mRNA polyadenylation);GO:0050265(RNA uridylyltransferase activity);GO:0050265(RNA uridylyltransferase activity)	NA	novel transcript	nonsense_mediated_decay;retained_intron	0.0989669	0.122214	0.408722	0.354458	1.41475	3.22674	0.126083	-2.98756	2.6568e-05	down	yes
ENSG00000134827	TCN1	ENST00000257264;ENST00000529251;ENST00000534531;ENST00000533734;ENST00000532419	GO:0005576(extracellular region);GO:0005615(extracellular space);GO:0006811(ion transport);GO:0006824(cobalt ion transport);GO:0009235(cobalamin metabolic process);GO:0015889(cobalamin transport);GO:0031419(cobalamin binding);GO:0035580(specific granule lumen);GO:0043312(neutrophil degranulation);GO:1904724(tertiary granule lumen);GO:1904724(tertiary granule lumen)	NA	transcobalamin 1 [Source:HGNC Symbol;Acc:HGNC:11652]	protein_coding;retained_intron;processed_transcript	0.0001	0.0637038	0.172443	0.329519	0.785277	0.829022	0.121538	-3.04053	0.000194615	down	yes
ENSG00000277150	F8A3	ENST00000622749	GO:0003674(molecular_function);GO:0005515(protein binding);GO:0005634(nucleus);GO:0008150(biological_process)	NA	coagulation factor VIII associated 3 [Source:HGNC Symbol;Acc:HGNC:31850]	protein_coding	0.52205	0.658668	0.619476	4.60911	6.75614	6.58533	0.100286	-3.31781	1.93561e-17	down	yes
ENSG00000151967	SCHIP1	ENST00000482804;ENST00000445224;ENST00000472483;ENST00000461058;ENST00000482885;ENST00000483730;ENST00000475932;ENST00000495954	GO:0005515(protein binding);GO:0005634(nucleus);GO:0005737(cytoplasm);GO:0005829(cytosol);GO:0005886(plasma membrane);GO:0016604(nuclear body);GO:0030054(cell junction);GO:0042802(identical protein binding);GO:0042802(identical protein binding)	NA	schwannomin interacting protein 1 [Source:HGNC Symbol;Acc:HGNC:15678]	protein_coding;retained_intron;processed_transcript;nonsense_mediated_decay	0.0488655	0.0560225	0.0759961	1.17489	0.0699122	1.04332	0.0790534	-3.66103	2.29945e-06	down	yes
ENSG00000128271	ADORA2A	ENST00000610595;ENST00000424232;ENST00000436735;ENST00000486108;ENST00000472248;ENST00000611543;ENST00000496497;ENST00000444262;ENST00000439591;ENST00000337539;ENST00000486351;ENST00000464977;ENST00000467385;ENST00000618076;ENST00000496258	GO:0000139(Golgi membrane);GO:0001609(G protein-coupled adenosine receptor activity);GO:0001963(synaptic transmission, dopaminergic);GO:0001973(adenosine receptor signaling pathway);GO:0001975(response to amphetamine);GO:0004930(G protein-coupled receptor activity);GO:0005515(protein binding);GO:0005882(intermediate filament);GO:0005886(plasma membrane);GO:0005887(integral component of plasma mem…	04015(Rap1 signaling pathway);04020(Calcium signaling pathway);04024(cAMP signaling pathway);04080(Neuroactive ligand-receptor interaction);04270(Vascular smooth muscle contraction);05012(Parkinson disease);05034(Alcoholism);05034(Alcoholism)	adenosine A2a receptor [Source:HGNC Symbol;Acc:HGNC:263]	protein_coding;processed_transcript	0.00263251	0.0307451	0.219097	1.64774	0.173106	1.77431	0.0702263	-3.83185	0.000204331	down	yes
ENSG00000112309	B3GAT2	ENST00000230053;ENST00000615536	GO:0000139(Golgi membrane);GO:0005794(Golgi apparatus);GO:0006486(protein glycosylation);GO:0015018(galactosylgalactosylxylosylprotein 3-beta-glucuronosyltransferase activity);GO:0016020(membrane);GO:0016021(integral component of membrane);GO:0016740(transferase activity);GO:0030203(glycosaminoglycan metabolic process);GO:0046872(metal ion binding);GO:0050650(chondroitin sulfate proteoglycan bios…	00515(Mannose type O-glycan biosynthesis);00515(Mannose type O-glycan biosynthesis)	beta-1,3-glucuronyltransferase 2 [Source:HGNC Symbol;Acc:HGNC:922]	protein_coding	0.009973	0.024108	0.025737	0.090943	0.201462	0.746975	0.0575516	-4.119	3.64753e-07	down	yes
ENSG00000205639	MFSD2B	ENST00000495018;ENST00000453731;ENST00000406420;ENST00000338315;ENST00000469562	GO:0005215(transporter activity);GO:0005886(plasma membrane);GO:0005887(integral component of plasma membrane);GO:0006869(lipid transport);GO:0008643(carbohydrate transport);GO:0015293(symporter activity);GO:0016020(membrane);GO:0016021(integral component of membrane);GO:0046624(sphingolipid transporter activity);GO:0055085(transmembrane transport);GO:0071702(organic substance transport);GO:00717…	NA	major facilitator superfamily domain containing 2B [Source:HGNC Symbol;Acc:HGNC:37207]	retained_intron;nonsense_mediated_decay;protein_coding	0.0001	0.0434159	0.0365812	0.0823623	0.891267	0.756712	0.0462898	-4.43316	6.13914e-06	down	yes
ENSG00000284292	AC004922	ENST00000441989;ENST00000638617	GO:0005515(protein binding);GO:0005885(Arp2/3 protein complex);GO:0015629(actin cytoskeleton);GO:0030833(regulation of actin filament polymerization);GO:0034314(Arp2/3 complex-mediated actin nucleation);GO:0034314(Arp2/3 complex-mediated actin nucleation)	NA	novel protein, ARPC1A and ARPC1B readthrough	nonsense_mediated_decay;protein_coding	0.634507	0.277505	0.235343	0.0709605	0.231789	26.9614	0.0420829	-4.57062	0.00115827	down	yes
ENSG00000272414	FAM47E-STBD1	ENST00000515604;ENST00000509377;ENST00000514140;ENST00000514365;ENST00000651133	NA	NA	FAM47E-STBD1 readthrough [Source:HGNC Symbol;Acc:HGNC:44667]	protein_coding;nonsense_mediated_decay	0.0001	0.0910045	0.311695	5.17128	0.0001	5.66538	0.0371697	-4.74973	0.00416349	down	yes
ENSG00000285943	AC112128	ENST00000649772	NA	NA	novel protein	nonsense_mediated_decay	0.0001	0.0001	0.02141	0.587852	0.031063	0.217851	0.0258256	-5.27505	2.01937e-05	down	yes
ENSG00000249624	AP000295	ENST00000646150;ENST00000432231;ENST00000433395	GO:0004896(cytokine receptor activity);GO:0004920(interleukin-10 receptor activity);GO:0005515(protein binding);GO:0005886(plasma membrane);GO:0019221(cytokine-mediated signaling pathway);GO:0019221(cytokine-mediated signaling pathway)	NA	novel protein	nonsense_mediated_decay;protein_coding	0.0001	0.0001	0.0001	0.0001	0.236528	0.476624	0.000420609	-11.2152	7.13496e-07	down	yes
ENSG00000261796	ISY1-RAB43	ENST00000418265	GO:0000350(generation of catalytic spliceosome for second transesterification step)	03040(Spliceosome)	ISY1-RAB43 readthrough [Source:HGNC Symbol;Acc:HGNC:42969]	protein_coding	0.0001	0.0001	0.0001	1.59448	1.02904	0.0001	0.000114346	-13.0943	3.44224e-08	down	yes
ENSG00000270757	HSPE1-MOB4	ENST00000604458	GO:0005524(ATP binding);GO:0005737(cytoplasm);GO:0006457(protein folding)	NA	HSPE1-MOB4 readthrough [Source:HGNC Symbol;Acc:HGNC:49184]	protein_coding	0.0001	0.0001	0.0001	2.10925	0.980443	0.0001	9.70939e-05	-13.3303	5.76663e-07	down	yes
