# Supplementary material for: Transcriptome and proteome analysis of the antitumor activity of maslinic acid against pancreatic cancer cells
Source: Aging (Albany NY). 2021 Oct 12;13(19):23308–27. doi: 10.18632/aging.203623 (PMC8544341; doi:10.18632/aging.203623)
Supplement: Supplementary Table 2 [file aging-13-203623-s003.xlsx]

## Sheet: MA_PANC1 VS PANC1
Supplementary Table 2. A complete list of proteins identified in PANC-1 cells with and without MA treatment.
Accession	GeneName	Description	Coverage [%]	# Peptides	# PSMs	# Unique Peptides	# AAs	MW [kDa]	calc. pI	Score Mascot: Mascot	Abundances MA_PANC1_1	Abundances MA_PANC1_2	Abundances MA_PANC1_3	Abundances PANC1_1	Abundances PANC1_2	Abundances PANC1_3	Average MA_PANC1	Average PANC1	Regulation	MA_PANC1/PANC1	P value
P02792	FTL	Ferritin light chain OS=Homo sapiens OX=9606 GN=FTL PE=1 SV=2	18	3	5	3	175	20	5.78	45	135.9	144	122.7	75.8	58.8	62.9	134.2	65.8333	UP	2.03848	0.00105283
Q9BUI4	POLR3C	DNA-directed RNA polymerase III subunit RPC3 OS=Homo sapiens OX=9606 GN=POLR3C PE=1 SV=1	2	1	1	1	534	60.6	7.31	0	142.3	113.3	104.6	85.3	76.5	77.9	120.067	79.9	UP	1.50271	0.0265988
P69891	HBG1	Hemoglobin subunit gamma-1 OS=Homo sapiens OX=9606 GN=HBG1 PE=1 SV=2	22	3	14	2	147	16.1	7.2	93	136.5	112.1	109.8	83.3	80.6	77.7	119.467	80.5333	UP	1.48344	0.011006
Q3SY84	KRT71	Keratin, type II cytoskeletal 71 OS=Homo sapiens OX=9606 GN=KRT71 PE=1 SV=3	5	3	26	2	523	57.3	6.61	114	120.1	126.2	106.2	85.2	81.4	80.9	117.5	82.5	UP	1.42424	0.00449443
Q9H8M2	BRD9	Bromodomain-containing protein 9 OS=Homo sapiens OX=9606 GN=BRD9 PE=1 SV=2	1	1	5	1	597	67	6.19	47	135.9	104.7	109.2	87.4	82.4	80.3	116.6	83.3667	UP	1.39864	0.0289445
Q9ULE4	FAM184B	Protein FAM184B OS=Homo sapiens OX=9606 GN=FAM184B PE=2 SV=3	1	1	7	1	1060	121	6.18	25	121.2	124.3	103.3	82.6	84.6	83.9	116.267	83.7	UP	1.38909	0.00772735
Q9NVT9	ARMC1	Armadillo repeat-containing protein 1 OS=Homo sapiens OX=9606 GN=ARMC1 PE=1 SV=1	11	4	6	4	282	31.3	5.74	69	115.7	133.8	99	83	85.3	83.2	116.167	83.8333	UP	1.38569	0.0326166
P19320	VCAM1	Vascular cell adhesion protein 1 OS=Homo sapiens OX=9606 GN=VCAM1 PE=1 SV=1	1	1	4	1	739	81.2	5.22	34	116.3	126.5	104.1	86.1	83.6	83.5	115.633	84.4	UP	1.37006	0.00875842
O75764	TCEA3	Transcription elongation factor A protein 3 OS=Homo sapiens OX=9606 GN=TCEA3 PE=1 SV=2	2	1	1	1	348	38.9	9.19	0	132.5	106.1	105.9	86.5	83	86	114.833	85.1667	UP	1.34834	0.0290242
Q14376	GALE	UDP-glucose 4-epimerase OS=Homo sapiens OX=9606 GN=GALE PE=1 SV=2	8	2	2	2	348	38.3	6.73	31	113.6	123.5	107.1	77.8	92.5	85.4	114.733	85.2333	UP	1.34611	0.00987146
Q9UBP0	SPAST	Spastin OS=Homo sapiens OX=9606 GN=SPAST PE=1 SV=1	1	1	3	1	616	67.2	9.64	0	116	119.3	108.4	83.9	87.6	84.8	114.567	85.4333	UP	1.34101	0.00103492
Q9NP64	ZCCHC17	Nucleolar protein of 40 kDa OS=Homo sapiens OX=9606 GN=ZCCHC17 PE=1 SV=1	11	2	3	2	241	27.6	9.7	52	106.3	111.2	120.3	86.5	88.3	87.3	112.6	87.3667	UP	1.28882	0.00364729
Q14147	DHX34	Probable ATP-dependent RNA helicase DHX34 OS=Homo sapiens OX=9606 GN=DHX34 PE=1 SV=2	2	1	1	1	1143	128	7.56	42	105.8	114	117.9	76.9	87.9	97.5	112.567	87.4333	UP	1.28746	0.0223038
P13196	ALAS1	5-aminolevulinate synthase, nonspecific, mitochondrial OS=Homo sapiens OX=9606 GN=ALAS1 PE=1 SV=2	5	4	4	4	640	70.5	8.46	38	106.3	108.8	120.6	86.7	89	88.5	111.9	88.0667	UP	1.27063	0.00593127
P10643	C7	Complement component C7 OS=Homo sapiens OX=9606 GN=C7 PE=1 SV=2	1	1	2	1	843	93.5	6.48	28	107.8	117.6	109.3	91.8	85.7	87.8	111.567	88.4333	UP	1.26159	0.00281532
Q9BTL3	RAMAC	RNA guanine-N7 methyltransferase activating subunit OS=Homo sapiens OX=9606 GN=RAMAC PE=1 SV=1	11	1	1	1	118	14.4	8.94	0	110.4	114.4	109.2	91.1	85.9	88.9	111.333	88.6333	UP	1.25611	0.000478437
P48058	GRIA4	Glutamate receptor 4 OS=Homo sapiens OX=9606 GN=GRIA4 PE=1 SV=2	1	1	2	1	902	100.8	8.1	0	117.2	113.9	102.8	84.1	88.1	94	111.3	88.7333	UP	1.25432	0.0124086
Q3B726	TWISTNB	DNA-directed RNA polymerase I subunit RPA43 OS=Homo sapiens OX=9606 GN=TWISTNB PE=1 SV=1	5	2	2	2	338	37.4	6.98	0	112.9	116.5	104.4	84.8	88.7	92.8	111.267	88.7667	UP	1.25347	0.00619631
Q68CQ7	GLT8D1	Glycosyltransferase 8 domain-containing protein 1 OS=Homo sapiens OX=9606 GN=GLT8D1 PE=1 SV=2	18	7	11	7	371	41.9	9.35	85	106.4	110.6	116.2	88.7	89.8	88.3	111.067	88.9333	UP	1.24888	0.00152935
O75385	ULK1	Serine/threonine-protein kinase ULK1 OS=Homo sapiens OX=9606 GN=ULK1 PE=1 SV=2	1	1	4	1	1050	112.6	8.79	48	114.5	108.3	109.2	79.4	94.8	93.9	110.667	89.3667	UP	1.23834	0.016402
Q9UPY5	SLC7A11	Cystine/glutamate transporter OS=Homo sapiens OX=9606 GN=SLC7A11 PE=1 SV=1	3	2	5	2	501	55.4	9.19	18	107.9	116.3	107.8	91.3	90	86.8	110.667	89.3667	UP	1.23834	0.00240178
Q9NZP5	OR5AC2	Olfactory receptor 5AC2 OS=Homo sapiens OX=9606 GN=OR5AC2 PE=3 SV=2	2	1	1	1	309	35.3	8.94	25	111.3	121.1	99.4	91.7	86.7	89.7	110.6	89.3667	UP	1.2376	0.0300158
P21397	MAOA	Amine oxidase [flavin-containing] A OS=Homo sapiens OX=9606 GN=MAOA PE=1 SV=1	9	4	6	4	527	59.6	7.85	18	117.7	98.7	115.4	84.7	87.9	95.6	110.6	89.4	UP	1.23714	0.0356849
Q693B1	KCTD11	BTB/POZ domain-containing protein KCTD11 OS=Homo sapiens OX=9606 GN=KCTD11 PE=1 SV=1	3	1	2	1	232	25.9	6.68	0	114.7	104.5	112.5	86.4	87.2	94.7	110.567	89.4333	UP	1.2363	0.00656922
P04424	ASL	Argininosuccinate lyase OS=Homo sapiens OX=9606 GN=ASL PE=1 SV=4	2	1	1	1	464	51.6	6.48	0	116.6	114.2	99.9	90.7	89.4	89.2	110.233	89.7667	UP	1.228	0.0173898
Q02156	PRKCE	Protein kinase C epsilon type OS=Homo sapiens OX=9606 GN=PRKCE PE=1 SV=1	3	2	2	1	737	83.6	7.12	29	103.2	104.5	122.8	88.1	89.9	91.5	110.167	89.8333	UP	1.22635	0.0336858
P01023	A2M	Alpha-2-macroglobulin OS=Homo sapiens OX=9606 GN=A2M PE=1 SV=3	3	4	16	4	1474	163.2	6.46	157	121.8	101.8	106.4	94.9	88.3	86.8	110	90	UP	1.22222	0.0377174
Q6NXT4	SLC30A6	Zinc transporter 6 OS=Homo sapiens OX=9606 GN=SLC30A6 PE=1 SV=2	7	3	7	3	461	51.1	9.16	82	115	103.4	111.5	89.9	87.8	92.4	109.967	90.0333	UP	1.2214	0.00564928
P02765	AHSG	Alpha-2-HS-glycoprotein OS=Homo sapiens OX=9606 GN=AHSG PE=1 SV=2	5	2	4	2	367	39.3	5.72	41	117.8	113.2	98.8	86.5	90.3	93.4	109.933	90.0667	UP	1.22058	0.0305598
Q9H0G5	NSRP1	Nuclear speckle splicing regulatory protein 1 OS=Homo sapiens OX=9606 GN=NSRP1 PE=1 SV=1	5	3	5	3	558	66.4	8.84	69	102	112.7	115.1	91.5	88.7	90	109.933	90.0667	UP	1.22058	0.008418
Q96EX3	WDR34	WD repeat-containing protein 34 OS=Homo sapiens OX=9606 GN=WDR34 PE=1 SV=2	2	1	2	1	536	57.8	6.64	0	112.7	116.8	100.1	91	90.5	88.9	109.867	90.1333	UP	1.21893	0.0175946
P00738	HP	Haptoglobin OS=Homo sapiens OX=9606 GN=HP PE=1 SV=1	6	3	6	3	406	45.2	6.58	30	99.4	120.7	109.4	90.3	89.2	91	109.833	90.1667	UP	1.21811	0.0333766
Q9NZ45	CISD1	CDGSH iron-sulfur domain-containing protein 1 OS=Homo sapiens OX=9606 GN=CISD1 PE=1 SV=1	35	3	7	3	108	12.2	9.09	106	110.6	117	101.5	96.9	89.2	84.9	109.7	90.3333	UP	1.21439	0.0274079
P32004	L1CAM	Neural cell adhesion molecule L1 OS=Homo sapiens OX=9606 GN=L1CAM PE=1 SV=2	15	14	21	14	1257	139.9	6.24	307	107.4	108.2	113.3	93.7	87.5	89.9	109.633	90.3667	UP	1.21321	0.00172638
Q9HAU0	PLEKHA5	Pleckstrin homology domain-containing family A member 5 OS=Homo sapiens OX=9606 GN=PLEKHA5 PE=1 SV=1	3	2	2	2	1116	127.4	7.53	22	103.2	118.1	107.4	90.7	86.4	94.2	109.567	90.4333	UP	1.21157	0.0183809
P02649	APOE	Apolipoprotein E OS=Homo sapiens OX=9606 GN=APOE PE=1 SV=1	5	2	4	2	317	36.1	5.73	47	115.4	105.7	107.5	92.4	86.7	92.2	109.533	90.4333	UP	1.21121	0.00557131
P02748	C9	Complement component C9 OS=Homo sapiens OX=9606 GN=C9 PE=1 SV=2	4	2	6	2	559	63.1	5.59	96	115.3	108.9	103.9	91.4	90.2	90.2	109.367	90.6	UP	1.20714	0.00484331
Q9H1C4	UNC93B1	Protein unc-93 homolog B1 OS=Homo sapiens OX=9606 GN=UNC93B1 PE=1 SV=2	4	2	2	2	597	66.6	6.96	17	105.1	107.1	115.7	91.5	91.7	88.8	109.3	90.6667	UP	1.20551	0.00530307
P35749	MYH11	Myosin-11 OS=Homo sapiens OX=9606 GN=MYH11 PE=1 SV=3	8	16	46	1	1972	227.2	5.5	595	108	115	104.6	85.6	91.6	95.3	109.2	90.8333	UP	1.2022	0.0116187
Q05682	CALD1	Caldesmon OS=Homo sapiens OX=9606 GN=CALD1 PE=1 SV=3	13	9	11	9	793	93.2	5.66	116	90.9	86.4	95.4	103	109.2	115.2	90.9	109.133	DOWN	0.832926	0.0140753
Q9BQB6	VKORC1	Vitamin K epoxide reductase complex subunit 1 OS=Homo sapiens OX=9606 GN=VKORC1 PE=1 SV=1	19	3	7	3	163	18.2	9.36	18	99.6	84.5	88.3	107.9	109	110.7	90.8	109.2	DOWN	0.831502	0.0162147
Q9Y4Z0	LSM4	U6 snRNA-associated Sm-like protein LSm4 OS=Homo sapiens OX=9606 GN=LSM4 PE=1 SV=1	22	3	3	3	139	15.3	9.99	38	86.9	94.6	90.8	116.9	104.7	106.1	90.7667	109.233	DOWN	0.830943	0.0142581
Q9H7P9	PLEKHG2	Pleckstrin homology domain-containing family G member 2 OS=Homo sapiens OX=9606 GN=PLEKHG2 PE=1 SV=3	4	5	5	5	1386	147.9	5.86	24	93	87.8	91	101.1	111.8	115.4	90.6	109.433	DOWN	0.827901	0.0144233
O75054	IGSF3	Immunoglobulin superfamily member 3 OS=Homo sapiens OX=9606 GN=IGSF3 PE=2 SV=3	7	7	9	7	1194	135.1	6.07	72	90.1	93	87.1	101.5	113.1	115.1	90.0667	109.9	DOWN	0.819533	0.0122435
P78504	JAG1	Protein jagged-1 OS=Homo sapiens OX=9606 GN=JAG1 PE=1 SV=3	4	5	8	5	1218	133.7	6.06	86	90.6	89.7	89	110.3	112	108.4	89.7667	110.233	DOWN	0.814333	5.62306e-05
Q9NXB9	ELOVL2	Elongation of very long chain fatty acids protein 2 OS=Homo sapiens OX=9606 GN=ELOVL2 PE=1 SV=2	3	1	2	1	296	34.6	9.26	34	88	83.8	97.4	112.5	111.2	107.2	89.7333	110.3	DOWN	0.813539	0.00893781
O00762	UBE2C	Ubiquitin-conjugating enzyme E2 C OS=Homo sapiens OX=9606 GN=UBE2C PE=1 SV=1	6	1	1	1	179	19.6	7.37	18	96.5	81.1	91	113.4	107.9	110	89.5333	110.433	DOWN	0.810746	0.0119641
P04792	HSPB1	Heat shock protein beta-1 OS=Homo sapiens OX=9606 GN=HSPB1 PE=1 SV=2	39	7	21	7	205	22.8	6.4	430	97.5	82.3	88.2	108.9	111.9	111.2	89.3333	110.667	DOWN	0.807229	0.0091459
Q15417	CNN3	Calponin-3 OS=Homo sapiens OX=9606 GN=CNN3 PE=1 SV=1	11	3	5	3	329	36.4	6.05	145	92.9	78.8	92.6	100.2	117.2	118.3	88.1	111.9	DOWN	0.78731	0.0334796
P67936	TPM4	Tropomyosin alpha-4 chain OS=Homo sapiens OX=9606 GN=TPM4 PE=1 SV=3	41	14	58	5	248	28.5	4.69	602	88.5	84.9	90.2	101.5	118	116.8	87.8667	112.1	DOWN	0.783824	0.0119015
Q12765	SCRN1	Secernin-1 OS=Homo sapiens OX=9606 GN=SCRN1 PE=1 SV=2	5	2	2	2	414	46.4	4.75	54	91.7	74	96.5	112.7	122.2	103	87.4	112.633	DOWN	0.775969	0.0456643
P06753	TPM3	Tropomyosin alpha-3 chain OS=Homo sapiens OX=9606 GN=TPM3 PE=1 SV=2	32	11	51	4	285	32.9	4.72	372	88.3	80.6	90.2	99.6	121.3	120	86.3667	113.633	DOWN	0.760047	0.0231546
Q96A00	PPP1R14A	Protein phosphatase 1 regulatory subunit 14A OS=Homo sapiens OX=9606 GN=PPP1R14A PE=1 SV=1	7	1	2	1	147	16.7	9.38	30	87.3	78.7	91.5	108.4	117.1	117	85.8333	114.167	DOWN	0.751825	0.00394855
P09493	TPM1	Tropomyosin alpha-1 chain OS=Homo sapiens OX=9606 GN=TPM1 PE=1 SV=2	38	14	54	5	284	32.7	4.74	409	85.8	76	80.8	100.5	128.2	128.8	80.8667	119.167	DOWN	0.678601	0.0171536
P07951	TPM2	Tropomyosin beta chain OS=Homo sapiens OX=9606 GN=TPM2 PE=1 SV=1	41	16	53	5	284	32.8	4.7	459	76.9	64.9	73.8	97.6	146.3	140.5	71.8667	128.133	DOWN	0.560874	0.023436
E9PRG8	C11orf98	Uncharacterized protein C11orf98 OS=Homo sapiens OX=9606 GN=C11orf98 PE=4 SV=2	28	4	9	4	123	14.2	11.53	181	281.7	63.4	69.6	60.7	61.3	63.3	138.233	61.7667	-	2.23799	0.346657
P19784	CSNK2A2	Casein kinase II subunit alpha' OS=Homo sapiens OX=9606 GN=CSNK2A2 PE=1 SV=1	14	4	4	4	350	41.2	8.56	51	262	61.9	82.8	61.3	64.5	67.5	135.567	64.4333	-	2.10398	0.325533
O94880	PHF14	PHD finger protein 14 OS=Homo sapiens OX=9606 GN=PHF14 PE=1 SV=2	4	4	6	4	888	100	5.33	42	180.8	62.9	140	72.3	67.5	76.4	127.9	72.0667	-	1.77475	0.182533
Q9C030	TRIM6	Tripartite motif-containing protein 6 OS=Homo sapiens OX=9606 GN=TRIM6 PE=1 SV=1	6	3	4	3	488	56.4	7.55	17	82.8	90.5	202.2	74.9	69	80.5	125.167	74.8	-	1.67335	0.26324
Q9P2E5	CHPF2	Chondroitin sulfate glucuronyltransferase OS=Homo sapiens OX=9606 GN=CHPF2 PE=2 SV=2	5	3	3	3	772	85.9	7.83	65	66.6	66.9	238.3	69.6	79.4	79.1	123.933	76.0333	-	1.62999	0.450019
Q9NZR1	TMOD2	Tropomodulin-2 OS=Homo sapiens OX=9606 GN=TMOD2 PE=1 SV=1	5	2	6	2	351	39.6	5.27	53	149.5	99.6	111.1	87.3	77.3	75.2	120.067	79.9333	-	1.50209	0.0611757
Q9H3U5	MFSD1	Major facilitator superfamily domain-containing protein 1 OS=Homo sapiens OX=9606 GN=MFSD1 PE=2 SV=2	5	2	5	2	465	51.2	6.74	107	136.3	135.4	86.8	68.5	66.7	106.3	119.5	80.5	-	1.48447	0.134534
P62854	RPS26	40S ribosomal protein S26 OS=Homo sapiens OX=9606 GN=RPS26 PE=1 SV=3	27	3	15	3	115	13	11	470	76.4	85.3	194.5	78.3	82.1	83.3	118.733	81.2333	-	1.46163	0.37959
Q96JA4	MS4A14	Membrane-spanning 4-domains subfamily A member 14 OS=Homo sapiens OX=9606 GN=MS4A14 PE=2 SV=2	1	1	2	1	679	76.5	5.6	0	140.9	113.9	99.1	105.5	67.4	73.2	117.967	82.0333	-	1.43803	0.102571
Q15147	PLCB4	1-phosphatidylinositol 4,5-bisphosphate phosphodiesterase beta-4 OS=Homo sapiens OX=9606 GN=PLCB4 PE=1 SV=3	4	6	6	6	1175	134.4	6.9	32	123.8	128.1	94.1	74	77.4	102.6	115.333	84.6667	-	1.3622	0.0934197
Q6PK18	OGFOD3	2-oxoglutarate and iron-dependent oxygenase domain-containing protein 3 OS=Homo sapiens OX=9606 GN=OGFOD3 PE=1 SV=2	8	3	5	3	319	35.6	8.18	52	89.5	82.2	173.8	85.1	85.6	83.8	115.167	84.8333	-	1.35756	0.360446
Q92993	KAT5	Histone acetyltransferase KAT5 OS=Homo sapiens OX=9606 GN=KAT5 PE=1 SV=2	2	1	1	1	513	58.5	8.48	0	116.1	121.5	107.4	56	107.4	91.5	115	84.9667	-	1.35347	0.129005
Q9HAN9	NMNAT1	Nicotinamide/nicotinic acid mononucleotide adenylyltransferase 1 OS=Homo sapiens OX=9606 GN=NMNAT1 PE=1 SV=1	10	3	6	3	279	31.9	8.87	47	88.1	95.1	161.9	86.1	85	83.9	115.033	85	-	1.35333	0.27087
O95613	PCNT	Pericentrin OS=Homo sapiens OX=9606 GN=PCNT PE=1 SV=4	1	1	1	1	3336	377.8	5.55	33	90.3	99.6	151.1	87.1	82.1	89.9	113.667	86.3667	-	1.31609	0.225031
A4D1S5	RAB19	Ras-related protein Rab-19 OS=Homo sapiens OX=9606 GN=RAB19 PE=2 SV=2	5	1	2	1	217	24.4	6.52	0	126.6	111.6	102.7	100.6	78.3	80.2	113.633	86.3667	-	1.31571	0.0523145
Q9GZP8	IMUP	Immortalization up-regulated protein OS=Homo sapiens OX=9606 GN=IMUP PE=1 SV=1	9	1	2	1	106	10.9	9.73	53	124.4	71.1	145.2	81.7	91.4	86.2	113.567	86.4333	-	1.31392	0.289526
Q06323	PSME1	Proteasome activator complex subunit 1 OS=Homo sapiens OX=9606 GN=PSME1 PE=1 SV=1	19	4	6	4	249	28.7	6.02	50	133.8	74.2	129.3	88.2	84.9	89.6	112.433	87.5667	-	1.28397	0.265205
Q8N9Z2	CCDC71L	Coiled-coil domain-containing protein 71L OS=Homo sapiens OX=9606 GN=CCDC71L PE=1 SV=2	6	1	1	1	235	26.2	11.71	0	91	94	151.5	85.2	88.3	90	112.167	87.8333	-	1.27704	0.2851
P69905	HBA1	Hemoglobin subunit alpha OS=Homo sapiens OX=9606 GN=HBA1 PE=1 SV=2	22	3	9	3	142	15.2	8.68	56	131.8	97	107.6	90.8	85.2	87.5	112.133	87.8333	-	1.27666	0.0801871
Q96GK7	FAHD2A	Fumarylacetoacetate hydrolase domain-containing protein 2A OS=Homo sapiens OX=9606 GN=FAHD2A PE=1 SV=1	28	7	15	7	314	34.6	8.24	81	87.4	94.8	152.6	88.4	85.9	90.9	111.6	88.4	-	1.26244	0.324334
Q8WWH5	TRUB1	Probable tRNA pseudouridine synthase 1 OS=Homo sapiens OX=9606 GN=TRUB1 PE=1 SV=1	7	2	3	2	349	37.2	8.25	71	110	69.9	152.4	86.7	89.9	91	110.767	89.2	-	1.24178	0.417059
P19634	SLC9A1	Sodium/hydrogen exchanger 1 OS=Homo sapiens OX=9606 GN=SLC9A1 PE=1 SV=2	3	2	3	2	815	90.7	7.21	46	99.5	105.4	124.2	98	88.9	84	109.7	90.3	-	1.21484	0.0846208
Q9Y3C7	MED31	Mediator of RNA polymerase II transcription subunit 31 OS=Homo sapiens OX=9606 GN=MED31 PE=1 SV=1	12	2	3	2	131	15.8	8.54	40	108.7	98.9	121.4	84.5	88	98.6	109.667	90.3667	-	1.21357	0.0679497
P04003	C4BPA	C4b-binding protein alpha chain OS=Homo sapiens OX=9606 GN=C4BPA PE=1 SV=2	1	1	5	1	597	67	7.3	43	123	100.2	104.6	86.7	91.9	93.5	109.267	90.7	-	1.2047	0.0632475
O43819	SCO2	Protein SCO2 homolog, mitochondrial OS=Homo sapiens OX=9606 GN=SCO2 PE=1 SV=3	21	5	12	5	266	29.8	8.85	127	98.7	93.3	135.9	92	90.6	89.6	109.3	90.7333	-	1.20463	0.238393
O95049	TJP3	Tight junction protein ZO-3 OS=Homo sapiens OX=9606 GN=TJP3 PE=1 SV=3	2	1	1	1	919	101.3	6.76	0	123.9	103.4	100.3	102.3	87.4	82.8	109.2	90.8333	-	1.2022	0.12411
P00734	F2	Prothrombin OS=Homo sapiens OX=9606 GN=F2 PE=1 SV=2	5	4	15	4	622	70	5.9	229	122.3	99.1	105.9	92.1	90.1	90.5	109.1	90.9	-	1.20022	0.0580158
Q99541	PLIN2	Perilipin-2 OS=Homo sapiens OX=9606 GN=PLIN2 PE=1 SV=2	10	5	7	5	437	48	6.8	24	111.1	110	106	93.4	89.2	90.3	109.033	90.9667	-	1.19861	0.000824835
Q8WWK9	CKAP2	Cytoskeleton-associated protein 2 OS=Homo sapiens OX=9606 GN=CKAP2 PE=1 SV=1	4	3	6	3	683	76.9	9.41	63	116.7	98.8	111.5	97.5	86.6	88.9	109	91	-	1.1978	0.0453541
Q01581	HMGCS1	Hydroxymethylglutaryl-CoA synthase, cytoplasmic OS=Homo sapiens OX=9606 GN=HMGCS1 PE=1 SV=2	3	1	1	1	520	57.3	5.41	0	114.7	103.5	108.7	89.2	94	89.8	108.967	91	-	1.19744	0.00732599
Q6ZS86	GK5	Putative glycerol kinase 5 OS=Homo sapiens OX=9606 GN=GK5 PE=2 SV=2	1	1	1	1	529	59.1	6.9	0	96.9	100.6	129.3	79	91.6	102.6	108.933	91.0667	-	1.19619	0.220037
Q86U86	PBRM1	Protein polybromo-1 OS=Homo sapiens OX=9606 GN=PBRM1 PE=1 SV=1	1	2	2	2	1689	192.8	6.89	30	101.3	98.4	126.8	91.2	89.6	92.7	108.833	91.1667	-	1.19378	0.123161
Q969T9	WBP2	WW domain-binding protein 2 OS=Homo sapiens OX=9606 GN=WBP2 PE=1 SV=1	7	2	2	2	261	28.1	5.91	0	106.9	98.3	121.1	76.6	93.7	103.4	108.767	91.2333	-	1.19218	0.16311
Q9Y584	TIMM22	Mitochondrial import inner membrane translocase subunit Tim22 OS=Homo sapiens OX=9606 GN=TIMM22 PE=1 SV=2	12	2	4	2	194	20	7.59	55	110.4	109.6	106.1	91.4	90.4	92	108.7	91.2667	-	1.19102	0.00023943
P23443	RPS6KB1	Ribosomal protein S6 kinase beta-1 OS=Homo sapiens OX=9606 GN=RPS6KB1 PE=1 SV=2	3	2	3	1	525	59.1	6.65	0	117.2	102.5	105.9	75.7	100.3	98.2	108.533	91.4	-	1.18745	0.130967
P19823	ITIH2	Inter-alpha-trypsin inhibitor heavy chain H2 OS=Homo sapiens OX=9606 GN=ITIH2 PE=1 SV=2	2	2	4	2	946	106.4	6.86	47	112.9	107.1	105.7	94.6	88.8	90.9	108.567	91.4333	-	1.18739	0.00352155
P16278	GLB1	Beta-galactosidase OS=Homo sapiens OX=9606 GN=GLB1 PE=1 SV=2	8	4	11	4	677	76	6.57	248	121.1	101.4	103.2	98.1	88.6	87.6	108.567	91.4333	-	1.18739	0.073923
Q6P2H3	CEP85	Centrosomal protein of 85 kDa OS=Homo sapiens OX=9606 GN=CEP85 PE=1 SV=1	7	4	4	4	762	85.6	6	57	109.6	106.6	109.4	90.2	90.2	93.9	108.533	91.4333	-	1.18702	0.000401497
Q99996	AKAP9	A-kinase anchor protein 9 OS=Homo sapiens OX=9606 GN=AKAP9 PE=1 SV=4	1	4	9	4	3907	452.7	4.98	45	111.4	113.7	100.4	91.4	91.4	91.7	108.5	91.5	-	1.18579	0.0143648
P06746	POLB	DNA polymerase beta OS=Homo sapiens OX=9606 GN=POLB PE=1 SV=3	10	4	5	4	335	38.2	8.95	21	110.3	106.4	108.7	90.1	93.6	90.8	108.467	91.5	-	1.18543	0.000402708
Q00587	CDC42EP1	Cdc42 effector protein 1 OS=Homo sapiens OX=9606 GN=CDC42EP1 PE=1 SV=1	9	3	3	3	391	40.3	7.15	20	107.2	99.5	118.7	98.1	86.3	90.2	108.467	91.5333	-	1.185	0.0615056
Q9Y282	ERGIC3	Endoplasmic reticulum-Golgi intermediate compartment protein 3 OS=Homo sapiens OX=9606 GN=ERGIC3 PE=1 SV=1	17	8	17	8	383	43.2	6.06	108	104	100.7	120.7	94.2	90.2	90.2	108.467	91.5333	-	1.185	0.0555689
Q9Y312	AAR2	Protein AAR2 homolog OS=Homo sapiens OX=9606 GN=AAR2 PE=1 SV=2	9	3	4	3	384	43.4	5.96	62	98.1	96.4	130.8	91	90.3	93.3	108.433	91.5333	-	1.18463	0.206823
Q7Z7H5	TMED4	Transmembrane emp24 domain-containing protein 4 OS=Homo sapiens OX=9606 GN=TMED4 PE=1 SV=1	27	6	24	4	227	25.9	8.28	344	97.6	101.8	126	93.7	90.2	90.8	108.467	91.5667	-	1.18456	0.130916
Q13501	SQSTM1	Sequestosome-1 OS=Homo sapiens OX=9606 GN=SQSTM1 PE=1 SV=1	43	10	35	10	440	47.7	5.22	942	105.4	110.3	109.4	90.8	91.6	92.4	108.367	91.6	-	1.18304	0.000441089
Q96KQ7	EHMT2	Histone-lysine N-methyltransferase EHMT2 OS=Homo sapiens OX=9606 GN=EHMT2 PE=1 SV=3	4	5	6	5	1210	132.3	5.45	19	98.5	94	132.7	88	91.8	95.1	108.4	91.6333	-	1.18298	0.247409
Q4U2R6	MRPL51	39S ribosomal protein L51, mitochondrial OS=Homo sapiens OX=9606 GN=MRPL51 PE=1 SV=1	15	3	4	3	128	15.1	11.27	18	95.3	105.5	124.3	96.7	94.1	84.1	108.367	91.6333	-	1.18261	0.147066
Q01196	RUNX1	Runt-related transcription factor 1 OS=Homo sapiens OX=9606 GN=RUNX1 PE=1 SV=3	10	4	4	4	453	48.7	9.35	24	107.8	104.9	112.2	94.2	90	90.8	108.3	91.6667	-	1.18145	0.00258035
Q15545	TAF7	Transcription initiation factor TFIID subunit 7 OS=Homo sapiens OX=9606 GN=TAF7 PE=1 SV=1	3	1	1	1	349	40.2	5.2	40	83	101.4	140.5	80	93	102.1	108.3	91.7	-	1.18103	0.411579
Q9NX95	SYBU	Syntabulin OS=Homo sapiens OX=9606 GN=SYBU PE=1 SV=2	1	1	1	1	663	72.3	6.25	0	115.3	101.1	108.3	83.7	95.5	96	108.233	91.7333	-	1.17987	0.0452825
Q9HD34	LYRM4	LYR motif-containing protein 4 OS=Homo sapiens OX=9606 GN=LYRM4 PE=1 SV=1	29	2	4	2	91	10.8	10.73	19	116.8	101.8	106.1	96.3	85.9	93.1	108.233	91.7667	-	1.17944	0.0384125
O00391	QSOX1	Sulfhydryl oxidase 1 OS=Homo sapiens OX=9606 GN=QSOX1 PE=1 SV=3	10	6	6	6	747	82.5	8.92	72	145	87.1	92.5	94	82	99.3	108.2	91.7667	-	1.17908	0.439456
Q9Y255	PRELID1	PRELI domain-containing protein 1, mitochondrial OS=Homo sapiens OX=9606 GN=PRELID1 PE=1 SV=1	8	2	2	2	219	25.2	9.54	29	105.7	109.5	109.2	93.8	91	90.8	108.133	91.8667	-	1.17707	0.000474782
Q9H8J5	MANSC1	MANSC domain-containing protein 1 OS=Homo sapiens OX=9606 GN=MANSC1 PE=2 SV=1	5	2	3	2	431	46.8	6.54	32	109.7	105.7	108.9	93.5	90.6	91.7	108.1	91.9333	-	1.17585	0.000405051
P12259	F5	Coagulation factor V OS=Homo sapiens OX=9606 GN=F5 PE=1 SV=4	2	5	8	5	2224	251.5	6.05	115	117.2	102.6	104.3	89.8	92	94	108.033	91.9333	-	1.17513	0.0278423
Q9H4G4	GLIPR2	Golgi-associated plant pathogenesis-related protein 1 OS=Homo sapiens OX=9606 GN=GLIPR2 PE=1 SV=3	25	3	5	3	154	17.2	9.41	59	110.7	109.3	104.2	95.6	88.8	91.5	108.067	91.9667	-	1.17506	0.00450272
Q9UGM3	DMBT1	Deleted in malignant brain tumors 1 protein OS=Homo sapiens OX=9606 GN=DMBT1 PE=1 SV=2	5	1	3	1	2413	260.6	5.44	188	101.9	121.3	100.8	93.3	92.4	90.3	108	92	-	1.17391	0.0758125
P16104	H2AFX	Histone H2AX OS=Homo sapiens OX=9606 GN=H2AFX PE=1 SV=2	27	6	61	3	143	15.1	10.74	506	104.7	111	108.3	88.9	91.4	95.7	108	92	-	1.17391	0.00404623
Q9NS91	RAD18	E3 ubiquitin-protein ligase RAD18 OS=Homo sapiens OX=9606 GN=RAD18 PE=1 SV=2	14	7	10	7	495	56.2	7.58	53	108.4	106.4	109.1	87	94.6	94.5	107.967	92.0333	-	1.17313	0.0038191
P35527	KRT9	Keratin, type I cytoskeletal 9 OS=Homo sapiens OX=9606 GN=KRT9 PE=1 SV=3	27	16	39	15	623	62	5.24	796	161.6	86.1	76.2	74	120.9	81.2	107.967	92.0333	-	1.17313	0.630704
Q9P016	THYN1	Thymocyte nuclear protein 1 OS=Homo sapiens OX=9606 GN=THYN1 PE=1 SV=1	24	6	12	6	225	25.7	9.25	92	95.4	104.3	124.1	93.4	92.5	90.4	107.933	92.1	-	1.17191	0.136943
Q6PL18	ATAD2	ATPase family AAA domain-containing protein 2 OS=Homo sapiens OX=9606 GN=ATAD2 PE=1 SV=1	13	17	26	17	1390	158.5	6.32	159	114.9	109.9	98.7	90.8	85.2	100.4	107.833	92.1333	-	1.17041	0.0739993
P25440	BRD2	Bromodomain-containing protein 2 OS=Homo sapiens OX=9606 GN=BRD2 PE=1 SV=2	5	5	8	4	801	88	9.09	26	97.9	103	122.6	91	92.4	93.1	107.833	92.1667	-	1.16998	0.106749
O00483	NDUFA4	Cytochrome c oxidase subunit NDUFA4 OS=Homo sapiens OX=9606 GN=NDUFA4 PE=1 SV=1	56	5	22	5	81	9.4	9.38	140	108.3	111.9	103	96.2	91.3	89.2	107.733	92.2333	-	1.16805	0.00946737
Q5JXB2	UBE2NL	Putative ubiquitin-conjugating enzyme E2 N-like OS=Homo sapiens OX=9606 GN=UBE2NL PE=1 SV=1	29	5	13	1	153	17.4	5.92	97	114.2	106.6	102.4	86.1	94	96.7	107.733	92.2667	-	1.16763	0.0300855
Q9H9L3	ISG20L2	Interferon-stimulated 20 kDa exonuclease-like 2 OS=Homo sapiens OX=9606 GN=ISG20L2 PE=1 SV=1	9	3	4	3	353	39.1	9.94	49	103.6	114.5	105.1	88.1	91.3	97.5	107.733	92.3	-	1.16721	0.024499
Q96B96	TMEM159	Promethin OS=Homo sapiens OX=9606 GN=TMEM159 PE=1 SV=2	4	1	2	1	161	17.5	5.06	0	105.1	111.8	106	95.9	91.8	89.3	107.633	92.3333	-	1.1657	0.00579597
Q8N5G2	MACO1	Macoilin OS=Homo sapiens OX=9606 GN=MACO1 PE=1 SV=1	5	3	3	3	664	76.1	9.07	32	111.3	106.9	104.7	89.6	87.4	100	107.633	92.3333	-	1.1657	0.0243871
Q8WUA2	PPIL4	Peptidyl-prolyl cis-trans isomerase-like 4 OS=Homo sapiens OX=9606 GN=PPIL4 PE=1 SV=1	11	5	6	5	492	57.2	5.92	75	102.1	106.2	114.6	97.1	87.9	92.1	107.633	92.3667	-	1.16528	0.0282211
O60637	TSPAN3	Tetraspanin-3 OS=Homo sapiens OX=9606 GN=TSPAN3 PE=2 SV=1	3	1	4	1	253	28	5.81	19	97.5	115.3	110.1	98.2	85.6	93.3	107.633	92.3667	-	1.16528	0.0765284
Q9Y548	YIPF1	Protein YIPF1 OS=Homo sapiens OX=9606 GN=YIPF1 PE=1 SV=1	11	2	2	2	306	34.3	5.31	27	100	115.1	107.7	90.9	100.6	85.6	107.6	92.3667	-	1.16492	0.0695596
P63096	GNAI1	Guanine nucleotide-binding protein G(i) subunit alpha-1 OS=Homo sapiens OX=9606 GN=GNAI1 PE=1 SV=2	29	9	41	4	354	40.3	5.97	610	120.8	108.1	93.9	84.8	94.8	97.6	107.6	92.4	-	1.1645	0.155048
P01889	HLA-B	HLA class I histocompatibility antigen, B alpha chain OS=Homo sapiens OX=9606 GN=HLA-B PE=1 SV=3	27	7	16	2	362	40.4	5.85	232	109	112.2	101.6	96.5	89.8	90.9	107.6	92.4	-	1.1645	0.0156062
P0DMV8	HSPA1A	Heat shock 70 kDa protein 1A OS=Homo sapiens OX=9606 GN=HSPA1A PE=1 SV=1	43	25	131	14	641	70	5.66	1822	103.1	114.4	105.3	89.1	92.6	95.6	107.6	92.4333	-	1.16408	0.0182489
O95429	BAG4	BAG family molecular chaperone regulator 4 OS=Homo sapiens OX=9606 GN=BAG4 PE=1 SV=1	7	3	3	2	457	49.6	5.12	19	110.8	104.8	107.2	94.3	90.3	92.7	107.6	92.4333	-	1.16408	0.00193373
P19021	PAM	Peptidyl-glycine alpha-amidating monooxygenase OS=Homo sapiens OX=9606 GN=PAM PE=1 SV=2	1	1	1	1	973	108.3	6.42	0	114.6	113.2	94.9	99.3	89.5	88.5	107.567	92.4333	-	1.16372	0.10416
Q96I27	ZNF625	Zinc finger protein 625 OS=Homo sapiens OX=9606 GN=ZNF625 PE=1 SV=1	18	2	2	2	306	34.7	8.98	0	109	105.2	108.5	95.3	94.2	87.8	107.567	92.4333	-	1.16372	0.00449033
O95140	MFN2	Mitofusin-2 OS=Homo sapiens OX=9606 GN=MFN2 PE=1 SV=3	30	21	41	21	757	86.3	6.98	511	109.5	110.1	103	91.4	93	93	107.533	92.4667	-	1.16294	0.00296964
P31689	DNAJA1	DnaJ homolog subfamily A member 1 OS=Homo sapiens OX=9606 GN=DNAJA1 PE=1 SV=2	37	14	38	14	397	44.8	7.08	794	107.4	111.9	103	95	90.7	91.9	107.433	92.5333	-	1.16102	0.00656122
Q9NWK9	ZNHIT6	Box C/D snoRNA protein 1 OS=Homo sapiens OX=9606 GN=ZNHIT6 PE=1 SV=1	8	4	5	4	470	53.9	5.8	31	107.8	113	101.6	93.5	93.4	90.8	107.467	92.5667	-	1.16097	0.0119917
O75521	ECI2	Enoyl-CoA delta isomerase 2, mitochondrial OS=Homo sapiens OX=9606 GN=ECI2 PE=1 SV=4	16	6	11	6	394	43.6	9	196	100.9	101.1	120.3	92.7	91.2	93.8	107.433	92.5667	-	1.1606	0.0833875
O95822	MLYCD	Malonyl-CoA decarboxylase, mitochondrial OS=Homo sapiens OX=9606 GN=MLYCD PE=1 SV=3	4	2	3	2	493	55	8.95	40	97	94.8	130.5	85.2	90.8	101.7	107.433	92.5667	-	1.1606	0.300936
P06727	APOA4	Apolipoprotein A-IV OS=Homo sapiens OX=9606 GN=APOA4 PE=1 SV=3	6	2	4	2	396	45.4	5.38	41	120.4	98.3	103.6	87.8	96.5	93.5	107.433	92.6	-	1.16019	0.10609
Q86Y39	NDUFA11	NADH dehydrogenase [ubiquinone] 1 alpha subcomplex subunit 11 OS=Homo sapiens OX=9606 GN=NDUFA11 PE=1 SV=3	20	2	5	2	141	14.8	8.72	85	108.3	106.9	107	90.1	93.4	94.3	107.4	92.6	-	1.15983	0.000397864
Q8WVC6	DCAKD	Dephospho-CoA kinase domain-containing protein OS=Homo sapiens OX=9606 GN=DCAKD PE=1 SV=1	16	3	5	3	231	26.5	9.58	14	109.5	115.3	97.2	89.1	91.5	97.4	107.333	92.6667	-	1.15827	0.0671236
Q9GZU1	MCOLN1	Mucolipin-1 OS=Homo sapiens OX=9606 GN=MCOLN1 PE=1 SV=1	6	2	3	2	580	65	7.24	41	103.9	100.4	117.5	103.3	88.3	86.6	107.267	92.7333	-	1.15672	0.122482
O75354	ENTPD6	Ectonucleoside triphosphate diphosphohydrolase 6 OS=Homo sapiens OX=9606 GN=ENTPD6 PE=1 SV=3	7	3	3	3	484	53.2	9.26	0	106	104.1	111.7	86.4	95.2	96.6	107.267	92.7333	-	1.15672	0.020785
Q5VWZ2	LYPLAL1	Lysophospholipase-like protein 1 OS=Homo sapiens OX=9606 GN=LYPLAL1 PE=1 SV=3	17	4	5	4	237	26.3	7.84	41	93.7	90.1	137.9	92.5	91.9	93.8	107.233	92.7333	-	1.15636	0.399138
Q9NQG6	MIEF1	Mitochondrial dynamics protein MID51 OS=Homo sapiens OX=9606 GN=MIEF1 PE=1 SV=1	4	2	2	2	463	51.3	7.64	21	109.8	106.6	105.3	95.4	88.3	94.6	107.233	92.7667	-	1.15595	0.00520419
Q86WW8	COA5	Cytochrome c oxidase assembly factor 5 OS=Homo sapiens OX=9606 GN=COA5 PE=1 SV=1	24	1	1	1	74	8.4	8.68	52	104.2	107.6	109.7	81.8	99.5	97.3	107.167	92.8667	-	1.15398	0.0691401
O43657	TSPAN6	Tetraspanin-6 OS=Homo sapiens OX=9606 GN=TSPAN6 PE=1 SV=1	17	4	10	4	245	27.5	8.1	66	124.5	98.7	98.1	89.4	92.2	97	107.1	92.8667	-	1.15327	0.188153
P02749	APOH	Beta-2-glycoprotein 1 OS=Homo sapiens OX=9606 GN=APOH PE=1 SV=3	3	1	1	1	345	38.3	7.97	0	93.9	109.2	118.3	93.8	91	93.9	107.133	92.9	-	1.15321	0.118565
Q86WA8	LONP2	Lon protease homolog 2, peroxisomal OS=Homo sapiens OX=9606 GN=LONP2 PE=1 SV=1	8	6	8	6	852	94.6	7.3	47	110.4	105	105.9	94.4	92.3	92	107.1	92.9	-	1.15285	0.00149592
O75879	GATB	Glutamyl-tRNA(Gln) amidotransferase subunit B, mitochondrial OS=Homo sapiens OX=9606 GN=GATB PE=1 SV=1	6	4	4	4	557	61.8	8.63	33	113.1	107.8	100.4	99.1	90.2	89.4	107.1	92.9	-	1.15285	0.042119
Q92973	TNPO1	Transportin-1 OS=Homo sapiens OX=9606 GN=TNPO1 PE=1 SV=2	16	12	23	12	898	102.3	4.98	482	104.1	101.8	115.3	88.1	93.2	97.5	107.067	92.9333	-	1.15208	0.046876
Q86W25	NLRP13	NACHT, LRR and PYD domains-containing protein 13 OS=Homo sapiens OX=9606 GN=NLRP13 PE=2 SV=2	1	1	5	1	1043	118.8	5.66	50	113.2	109.3	98.7	86.3	97.7	94.8	107.067	92.9333	-	1.15208	0.0626082
Q9H2G4	TSPYL2	Testis-specific Y-encoded-like protein 2 OS=Homo sapiens OX=9606 GN=TSPYL2 PE=1 SV=1	5	3	3	3	693	79.4	4.58	92	100.1	109.6	111.5	96.6	90	92.3	107.067	92.9667	-	1.15167	0.0247654
Q9H2D6	TRIOBP	TRIO and F-actin-binding protein OS=Homo sapiens OX=9606 GN=TRIOBP PE=1 SV=3	2	4	5	4	2365	261.2	8.48	30	108.5	112.7	99.9	92.4	93.7	92.8	107.033	92.9667	-	1.15131	0.0205679
O14967	CLGN	Calmegin OS=Homo sapiens OX=9606 GN=CLGN PE=1 SV=1	15	9	19	9	610	70	4.69	27	108.6	111.8	100.7	94.7	92.8	91.5	107.033	93	-	1.1509	0.014915
Q8IUH4	ZDHHC13	Palmitoyltransferase ZDHHC13 OS=Homo sapiens OX=9606 GN=ZDHHC13 PE=1 SV=3	8	4	8	4	622	70.8	8.07	172	95	100.3	125.7	91.3	92.5	95.2	107	93	-	1.15054	0.216312
Q96C45	ULK4	Serine/threonine-protein kinase ULK4 OS=Homo sapiens OX=9606 GN=ULK4 PE=1 SV=2	1	1	3	1	1275	142.4	6.29	23	109.2	110	101.7	90.1	92.5	96.4	106.967	93	-	1.15018	0.0122559
Q9NVM9	INTS13	Integrator complex subunit 13 OS=Homo sapiens OX=9606 GN=INTS13 PE=1 SV=2	9	6	11	6	706	80.2	6.7	82	105.8	95.8	119.4	93.9	91.5	93.7	107	93.0333	-	1.15013	0.11229
Q6UXT9	ABHD15	Protein ABHD15 OS=Homo sapiens OX=9606 GN=ABHD15 PE=1 SV=2	5	2	3	2	468	51.7	7.61	25	108	106.9	106	90.2	95.7	93.2	106.967	93.0333	-	1.14977	0.00118526
Q9ULK4	MED23	Mediator of RNA polymerase II transcription subunit 23 OS=Homo sapiens OX=9606 GN=MED23 PE=1 SV=2	3	4	4	4	1368	156.4	7.4	33	107.4	110.9	102.5	94.4	92.7	92.1	106.933	93.0667	-	1.149	0.00540758
Q8TDD5	MCOLN3	Mucolipin-3 OS=Homo sapiens OX=9606 GN=MCOLN3 PE=1 SV=1	1	1	1	1	553	64.2	6.18	0	107.9	109.1	103.7	96.7	91.3	91.2	106.9	93.0667	-	1.14864	0.00481425
Q9H967	WDR76	WD repeat-containing protein 76 OS=Homo sapiens OX=9606 GN=WDR76 PE=1 SV=2	8	6	7	6	626	69.7	9.25	35	108.4	114.4	97.9	98.5	92.3	88.5	106.9	93.1	-	1.14823	0.0704938
O76096	CST7	Cystatin-F OS=Homo sapiens OX=9606 GN=CST7 PE=1 SV=1	5	1	1	1	145	16.4	8.48	0	113.4	102.5	104.6	91	95.4	93.1	106.833	93.1667	-	1.14669	0.0186884
P07711	CTSL	Cathepsin L1 OS=Homo sapiens OX=9606 GN=CTSL PE=1 SV=2	9	3	4	3	333	37.5	5.45	43	108	102.9	109.4	98.3	92.5	88.8	106.767	93.2	-	1.14557	0.0162259
O43493	TGOLN2	Trans-Golgi network integral membrane protein 2 OS=Homo sapiens OX=9606 GN=TGOLN2 PE=1 SV=4	34	13	38	13	437	45.9	5.63	374	103.8	108.8	107.8	95.1	92.5	92.1	106.8	93.2333	-	1.14551	0.00163823
O94916	NFAT5	Nuclear factor of activated T-cells 5 OS=Homo sapiens OX=9606 GN=NFAT5 PE=1 SV=1	1	2	2	2	1531	165.7	5.24	0	109.6	101.7	109	89.4	98.1	92.2	106.767	93.2333	-	1.14516	0.0199425
Q9NWV4	CZIB	CXXC motif containing zinc binding protein OS=Homo sapiens OX=9606 GN=CZIB PE=1 SV=1	26	3	3	3	160	18	5.01	0	106.5	103.7	110.1	86.1	96.1	97.5	106.767	93.2333	-	1.14516	0.0285568
P31153	MAT2A	S-adenosylmethionine synthase isoform type-2 OS=Homo sapiens OX=9606 GN=MAT2A PE=1 SV=1	23	8	14	8	395	43.6	6.48	120	93.8	89.7	136.8	89.6	94.7	95.4	106.767	93.2333	-	1.14516	0.422855
Q9C0E8	LNPK	Endoplasmic reticulum junction formation protein lunapark OS=Homo sapiens OX=9606 GN=LNPK PE=1 SV=2	10	4	6	4	428	47.7	5.11	25	107.3	105.1	107.9	82.1	94.7	103	106.767	93.2667	-	1.14475	0.0926042
O15550	KDM6A	Lysine-specific demethylase 6A OS=Homo sapiens OX=9606 GN=KDM6A PE=1 SV=2	1	1	1	1	1401	154.1	7.44	0	107.8	109	103.4	89.5	95.7	94.6	106.733	93.2667	-	1.14439	0.006239
O43148	RNMT	mRNA cap guanine-N7 methyltransferase OS=Homo sapiens OX=9606 GN=RNMT PE=1 SV=1	14	6	14	6	476	54.8	6.61	188	105.7	108	106.5	91.8	92.4	95.6	106.733	93.2667	-	1.14439	0.00058138
P52758	RIDA	2-iminobutanoate/2-iminopropanoate deaminase OS=Homo sapiens OX=9606 GN=RIDA PE=1 SV=1	15	2	9	2	137	14.5	8.68	57	115.9	105.3	99	88.9	91.3	99.6	106.733	93.2667	-	1.14439	0.0845918
O95248	SBF1	Myotubularin-related protein 5 OS=Homo sapiens OX=9606 GN=SBF1 PE=1 SV=4	0	1	2	1	1868	208.3	6.9	20	101.1	111	108.1	100.8	87.5	91.6	106.733	93.3	-	1.14398	0.0520929
Q9H7N4	SCAF1	Splicing factor, arginine/serine-rich 19 OS=Homo sapiens OX=9606 GN=SCAF1 PE=1 SV=3	4	4	5	3	1312	139.2	9.25	51	106.3	108.5	105.3	94.6	93.7	91.6	106.7	93.3	-	1.14362	0.000495913
O14981	BTAF1	TATA-binding protein-associated factor 172 OS=Homo sapiens OX=9606 GN=BTAF1 PE=1 SV=2	2	2	2	2	1849	206.8	6.52	51	106.3	70.8	142.9	95	82.8	102.1	106.667	93.3	-	1.14327	0.568912
Q9UP95	SLC12A4	Solute carrier family 12 member 4 OS=Homo sapiens OX=9606 GN=SLC12A4 PE=1 SV=2	13	13	20	8	1085	120.6	6.44	162	106.3	107.4	106.3	94.8	92.1	93.1	106.667	93.3333	-	1.14286	0.000105371
P20585	MSH3	DNA mismatch repair protein Msh3 OS=Homo sapiens OX=9606 GN=MSH3 PE=1 SV=4	5	6	9	6	1137	127.3	8.02	112	102.6	101	116.4	92.9	92.4	94.7	106.667	93.3333	-	1.14286	0.0540913
Q16637	SMN1	Survival motor neuron protein OS=Homo sapiens OX=9606 GN=SMN1 PE=1 SV=1	14	3	3	3	294	31.8	6.55	61	105.9	109.4	104.6	96.5	91.8	91.7	106.633	93.3333	-	1.1425	0.00338754
Q6Y2X3	DNAJC14	DnaJ homolog subfamily C member 14 OS=Homo sapiens OX=9606 GN=DNAJC14 PE=2 SV=2	4	2	2	2	702	78.5	8.09	58	107.9	111.4	100.6	97.5	92.1	90.5	106.633	93.3667	-	1.14209	0.0255514
Q9NP84	TNFRSF12A	Tumor necrosis factor receptor superfamily member 12A OS=Homo sapiens OX=9606 GN=TNFRSF12A PE=1 SV=1	23	2	4	2	129	13.9	8.95	61	108.4	105.6	105.9	91.9	94.1	94.1	106.633	93.3667	-	1.14209	0.000323894
O60704	TPST2	Protein-tyrosine sulfotransferase 2 OS=Homo sapiens OX=9606 GN=TPST2 PE=1 SV=1	2	1	1	1	377	41.9	9.09	17	107.4	100.7	111.8	89.3	94.4	96.4	106.633	93.3667	-	1.14209	0.0263186
Q9NXR1	NDE1	Nuclear distribution protein nudE homolog 1 OS=Homo sapiens OX=9606 GN=NDE1 PE=1 SV=3	4	1	1	1	335	37.7	5.15	32	90.6	88.8	140.4	94.3	95.4	90.4	106.6	93.3667	-	1.14174	0.47921
Q9NZV1	CRIM1	Cysteine-rich motor neuron 1 protein OS=Homo sapiens OX=9606 GN=CRIM1 PE=1 SV=1	5	4	5	4	1036	113.7	5.21	71	94.3	103.9	121.5	88	93	99.3	106.567	93.4333	-	1.14056	0.20183
Q9C005	DPY30	Protein dpy-30 homolog OS=Homo sapiens OX=9606 GN=DPY30 PE=1 SV=1	11	2	5	2	99	11.2	4.88	30	105	112.9	101.8	93.7	91.8	94.8	106.567	93.4333	-	1.14056	0.0183342
Q96K80	ZC3H10	Zinc finger CCCH domain-containing protein 10 OS=Homo sapiens OX=9606 GN=ZC3H10 PE=1 SV=1	2	1	1	1	434	46	7.64	0	107.8	111.5	100.4	94.9	93.3	92.2	106.567	93.4667	-	1.14016	0.0174889
P0C221	CCDC175	Coiled-coil domain-containing protein 175 OS=Homo sapiens OX=9606 GN=CCDC175 PE=4 SV=2	1	1	4	1	793	93.6	6.71	48	111	110.2	98.4	93.6	92.8	94	106.533	93.4667	-	1.1398	0.0330271
P21359	NF1	Neurofibromin OS=Homo sapiens OX=9606 GN=NF1 PE=1 SV=2	1	2	4	2	2839	319.2	7.39	0	110.6	113.5	95.5	97	90.1	93.3	106.533	93.4667	-	1.1398	0.0921129
Q9BWH2	FUNDC2	FUN14 domain-containing protein 2 OS=Homo sapiens OX=9606 GN=FUNDC2 PE=1 SV=2	17	4	5	4	189	20.7	9.73	55	110.1	105.8	103.6	92.7	95.1	92.7	106.5	93.5	-	1.13904	0.00328023
Q8TAD8	SNIP1	Smad nuclear-interacting protein 1 OS=Homo sapiens OX=9606 GN=SNIP1 PE=1 SV=1	21	8	11	8	396	45.8	9.99	146	102.5	107.8	109.2	95.8	90.9	93.8	106.5	93.5	-	1.13904	0.00639875
P31431	SDC4	Syndecan-4 OS=Homo sapiens OX=9606 GN=SDC4 PE=1 SV=2	23	5	6	5	198	21.6	4.5	61	114.9	102.4	102.2	100.3	90.2	90	106.5	93.5	-	1.13904	0.0739156
P01008	SERPINC1	Antithrombin-III OS=Homo sapiens OX=9606 GN=SERPINC1 PE=1 SV=1	2	1	4	1	464	52.6	6.71	21	121.9	95.7	101.9	90.5	98.1	92	106.5	93.5333	-	1.13863	0.190677
Q7KYR7	BTN2A1	Butyrophilin subfamily 2 member A1 OS=Homo sapiens OX=9606 GN=BTN2A1 PE=1 SV=3	7	4	8	4	527	59.6	6.48	46	103.1	116.1	100.2	91.8	92.7	96.1	106.467	93.5333	-	1.13828	0.0629442
Q9NUP9	LIN7C	Protein lin-7 homolog C OS=Homo sapiens OX=9606 GN=LIN7C PE=1 SV=1	25	5	13	5	197	21.8	8.43	110	112.1	106	101.2	97.4	89.9	93.3	106.433	93.5333	-	1.13792	0.0280321
Q8IUF8	RIOX2	Ribosomal oxygenase 2 OS=Homo sapiens OX=9606 GN=RIOX2 PE=1 SV=1	13	6	10	6	465	52.8	6.7	87	94.5	100.9	123.9	92.3	90.9	97.5	106.433	93.5667	-	1.13751	0.232377
Q16678	CYP1B1	Cytochrome P450 1B1 OS=Homo sapiens OX=9606 GN=CYP1B1 PE=1 SV=2	12	6	8	6	543	60.8	8.98	44	110.3	104.2	104.7	96.1	92.4	92.3	106.4	93.6	-	1.13675	0.00527581
O60220	TIMM8A	Mitochondrial import inner membrane translocase subunit Tim8 A OS=Homo sapiens OX=9606 GN=TIMM8A PE=1 SV=1	23	2	7	2	97	11	5.16	62	91	120.2	107.9	81.7	98.9	100.2	106.367	93.6	-	1.1364	0.285038
Q8IWI9	MGA	MAX gene-associated protein OS=Homo sapiens OX=9606 GN=MGA PE=1 SV=4	2	4	4	4	3065	336	6.9	36	104.3	105.9	108.9	91.1	93.7	96	106.367	93.6	-	1.1364	0.00283934
Q92610	ZNF592	Zinc finger protein 592 OS=Homo sapiens OX=9606 GN=ZNF592 PE=1 SV=2	1	1	1	1	1267	137.4	7.84	0	96.2	122.9	100	97.9	97.5	85.4	106.367	93.6	-	1.1364	0.241476
Q92478	CLEC2B	C-type lectin domain family 2 member B OS=Homo sapiens OX=9606 GN=CLEC2B PE=1 SV=2	19	2	2	2	149	17.3	8.75	28	104.7	107.2	107.2	96.4	89.5	95.1	106.367	93.6667	-	1.13559	0.00504917
A0A0B4J2F0	PIGBOS1	Protein PIGBOS1 OS=Homo sapiens OX=9606 GN=PIGBOS1 PE=3 SV=1	19	1	3	1	54	6.3	8.5	55	104.5	116.5	98.1	97.1	92.1	91.8	106.367	93.6667	-	1.13559	0.088259
O75845	SC5D	Lathosterol oxidase OS=Homo sapiens OX=9606 GN=SC5D PE=1 SV=2	8	3	3	3	299	35.3	8.07	33	100	101	118	93.4	92.7	94.9	106.333	93.6667	-	1.13523	0.0973779
Q32NB8	PGS1	CDP-diacylglycerol--glycerol-3-phosphate 3-phosphatidyltransferase, mitochondrial OS=Homo sapiens OX=9606 GN=PGS1 PE=2 SV=1	2	1	1	1	556	62.7	8.9	0	113.5	106.6	98.9	96.2	90.1	94.7	106.333	93.6667	-	1.13523	0.0511456
Q96FJ2	DYNLL2	Dynein light chain 2, cytoplasmic OS=Homo sapiens OX=9606 GN=DYNLL2 PE=1 SV=1	20	2	8	1	89	10.3	7.37	34	96.2	106.7	116.1	92.1	95.3	93.7	106.333	93.7	-	1.13483	0.0957905
Q7L5N1	COPS6	COP9 signalosome complex subunit 6 OS=Homo sapiens OX=9606 GN=COPS6 PE=1 SV=1	6	2	2	2	327	36.1	5.73	27	103.5	112.6	102.8	93.3	91.9	95.9	106.3	93.7	-	1.13447	0.0200825
Q9UQ35	SRRM2	Serine/arginine repetitive matrix protein 2 OS=Homo sapiens OX=9606 GN=SRRM2 PE=1 SV=2	17	35	83	35	2752	299.4	12.06	1300	100.7	106.8	111.4	94.7	93.2	93.2	106.3	93.7	-	1.13447	0.0159434
Q9NVH0	EXD2	Exonuclease 3'-5' domain-containing protein 2 OS=Homo sapiens OX=9606 GN=EXD2 PE=1 SV=2	9	5	6	5	621	70.3	8.32	45	110.1	104.1	104.5	95.5	94.3	91.4	106.233	93.7333	-	1.13336	0.00545327
Q16625	OCLN	Occludin OS=Homo sapiens OX=9606 GN=OCLN PE=1 SV=1	19	7	15	7	522	59.1	6.09	257	109.6	106.1	103	99.3	90.8	91.2	106.233	93.7667	-	1.13295	0.0206857
P48723	HSPA13	Heat shock 70 kDa protein 13 OS=Homo sapiens OX=9606 GN=HSPA13 PE=1 SV=1	6	2	3	2	471	51.9	5.76	35	114.6	99.7	104.3	88.7	98	94.6	106.2	93.7667	-	1.1326	0.0741626
Q12929	EPS8	Epidermal growth factor receptor kinase substrate 8 OS=Homo sapiens OX=9606 GN=EPS8 PE=1 SV=1	19	12	20	12	822	91.8	7.5	244	99.5	95.9	123.3	94.2	92.4	94.8	106.233	93.8	-	1.13255	0.222949
P18859	ATP5PF	ATP synthase-coupling factor 6, mitochondrial OS=Homo sapiens OX=9606 GN=ATP5PF PE=1 SV=1	52	6	20	6	108	12.6	9.52	384	108.3	111.5	98.8	97.5	91.4	92.5	106.2	93.8	-	1.1322	0.0433599
P98160	HSPG2	Basement membrane-specific heparan sulfate proteoglycan core protein OS=Homo sapiens OX=9606 GN=HSPG2 PE=1 SV=4	3	12	13	12	4391	468.5	6.51	113	111.8	105.6	101.1	86.5	94.3	100.7	106.167	93.8333	-	1.13144	0.0746154
Q8IYA6	CKAP2L	Cytoskeleton-associated protein 2-like OS=Homo sapiens OX=9606 GN=CKAP2L PE=1 SV=4	2	2	2	2	745	83.5	9.83	26	91.5	101	126	93.6	89.5	98.4	106.167	93.8333	-	1.13144	0.309509
P62745	RHOB	Rho-related GTP-binding protein RhoB OS=Homo sapiens OX=9606 GN=RHOB PE=1 SV=1	20	3	4	2	196	22.1	5.24	92	110.1	103.5	104.8	94.1	94.9	92.5	106.133	93.8333	-	1.13108	0.00452883
Q9H0U9	TSPYL1	Testis-specific Y-encoded-like protein 1 OS=Homo sapiens OX=9606 GN=TSPYL1 PE=1 SV=3	17	6	11	6	437	49.2	5.45	104	102.4	104.4	111.6	97.1	91.4	93	106.133	93.8333	-	1.13108	0.0197277
Q04721	NOTCH2	Neurogenic locus notch homolog protein 2 OS=Homo sapiens OX=9606 GN=NOTCH2 PE=1 SV=3	4	9	13	9	2471	265.2	5.14	110	106.1	109	103.2	95	92.8	93.8	106.1	93.8667	-	1.13033	0.0024029
A6NJ78	METTL15	Probable methyltransferase-like protein 15 OS=Homo sapiens OX=9606 GN=METTL15 PE=1 SV=1	7	2	2	2	407	46.1	8.62	74	110.3	108.1	99.9	113.5	93.5	74.6	106.1	93.8667	-	1.13033	0.353609
Q8IY95	TMEM192	Transmembrane protein 192 OS=Homo sapiens OX=9606 GN=TMEM192 PE=1 SV=1	21	5	9	5	271	30.9	7.99	118	110.2	106.6	101.5	93.9	95.6	92.2	106.1	93.9	-	1.12993	0.01078
Q70Z53	FRA10AC1	Protein FRA10AC1 OS=Homo sapiens OX=9606 GN=FRA10AC1 PE=1 SV=3	6	2	2	2	315	37.5	8.1	30	111.2	103.4	103.6	92.4	96.3	93.1	106.067	93.9333	-	1.12917	0.0128357
Q9H0N5	PCBD2	Pterin-4-alpha-carbinolamine dehydratase 2 OS=Homo sapiens OX=9606 GN=PCBD2 PE=1 SV=4	5	1	2	1	130	14.4	9.11	0	101.5	104.2	112.5	96	92.9	92.9	106.067	93.9333	-	1.12917	0.0249108
Q8TD22	SFXN5	Sideroflexin-5 OS=Homo sapiens OX=9606 GN=SFXN5 PE=1 SV=1	12	3	3	3	340	37.1	9.33	55	98.5	108.5	111.1	88.1	96.6	97.2	106.033	93.9667	-	1.12841	0.0671067
Q14118	DAG1	Dystroglycan OS=Homo sapiens OX=9606 GN=DAG1 PE=1 SV=2	10	8	15	8	895	97.4	8.56	201	103.4	99.6	115.1	92.7	96.4	92.8	106.033	93.9667	-	1.12841	0.0665324
Q9BU76	MMTAG2	Multiple myeloma tumor-associated protein 2 OS=Homo sapiens OX=9606 GN=MMTAG2 PE=1 SV=1	19	5	6	5	263	29.4	10.02	80	99.9	106.4	111.7	92.9	94.8	94.2	106	93.9667	-	1.12806	0.0253554
Q9BTT6	LRRC1	Leucine-rich repeat-containing protein 1 OS=Homo sapiens OX=9606 GN=LRRC1 PE=1 SV=1	15	6	15	4	524	59.2	5.02	170	105.3	110.3	102.5	93.7	93.3	95	106.033	94	-	1.12801	0.00676254
Q7Z2E3	APTX	Aprataxin OS=Homo sapiens OX=9606 GN=APTX PE=1 SV=2	10	4	8	4	356	40.7	9.17	46	108.9	107.5	101.6	91.9	94.4	95.7	106	94	-	1.12766	0.00864008
P05166	PCCB	Propionyl-CoA carboxylase beta chain, mitochondrial OS=Homo sapiens OX=9606 GN=PCCB PE=1 SV=3	27	11	20	11	539	58.2	7.64	292	100.6	97.5	119.9	94.8	93.1	94.1	106	94	-	1.12766	0.162773
Q96EU6	RRP36	Ribosomal RNA processing protein 36 homolog OS=Homo sapiens OX=9606 GN=RRP36 PE=1 SV=1	12	2	3	2	259	29.8	10.17	66	107.2	106.1	104.6	96.2	94.6	91.3	105.967	94.0333	-	1.12691	0.00184165
Q96MH6	TMEM68	Transmembrane protein 68 OS=Homo sapiens OX=9606 GN=TMEM68 PE=2 SV=2	6	1	1	1	324	37.4	7.85	52	105.7	102.9	109.2	106.6	88.1	87.4	105.933	94.0333	-	1.12655	0.143198
O95391	SLU7	Pre-mRNA-splicing factor SLU7 OS=Homo sapiens OX=9606 GN=SLU7 PE=1 SV=2	3	2	2	2	586	68.3	7.14	32	104.3	101	112.5	93.7	94	94.5	105.933	94.0667	-	1.12615	0.0257471
Q99496	RNF2	E3 ubiquitin-protein ligase RING2 OS=Homo sapiens OX=9606 GN=RNF2 PE=1 SV=1	11	3	8	2	336	37.6	6.84	94	101.5	106.3	110	87.1	97.1	98	105.933	94.0667	-	1.12615	0.0499535
Q15714	TSC22D1	TSC22 domain family protein 1 OS=Homo sapiens OX=9606 GN=TSC22D1 PE=1 SV=3	1	1	2	1	1073	109.6	5.64	0	105.1	103.6	109	85.4	98.1	98.7	105.9	94.0667	-	1.1258	0.0627622
Q00403	GTF2B	Transcription initiation factor IIB OS=Homo sapiens OX=9606 GN=GTF2B PE=1 SV=1	25	6	9	6	316	34.8	8.35	70	102.1	110.7	104.9	93.5	92.5	96.3	105.9	94.1	-	1.1254	0.0131519
Q8NBJ4	GOLM1	Golgi membrane protein 1 OS=Homo sapiens OX=9606 GN=GOLM1 PE=1 SV=1	35	12	22	12	401	45.3	4.97	399	105.1	108.5	104.1	94.7	94.7	93	105.9	94.1333	-	1.125	0.0012448
Q9BWC9	CCDC106	Coiled-coil domain-containing protein 106 OS=Homo sapiens OX=9606 GN=CCDC106 PE=1 SV=1	7	2	2	2	280	32	9.42	0	102.8	109.8	105	102.4	88.4	91.6	105.867	94.1333	-	1.12465	0.0675015
Q9BRQ8	AIFM2	Apoptosis-inducing factor 2 OS=Homo sapiens OX=9606 GN=AIFM2 PE=1 SV=1	11	3	8	3	373	40.5	9.11	106	102	103.8	111.8	91.3	94.4	96.7	105.867	94.1333	-	1.12465	0.0258854
P41223	BUD31	Protein BUD31 homolog OS=Homo sapiens OX=9606 GN=BUD31 PE=1 SV=2	35	7	17	7	144	17	8.82	100	103.5	104.5	109.6	92.1	97.1	93.3	105.867	94.1667	-	1.12425	0.00838818
Q96QD8	SLC38A2	Sodium-coupled neutral amino acid transporter 2 OS=Homo sapiens OX=9606 GN=SLC38A2 PE=1 SV=2	16	5	18	5	506	56	8	561	103.3	104.9	109.3	89.5	97.7	95.3	105.833	94.1667	-	1.12389	0.0181701
A0A087WUL8	NBPF19	Neuroblastoma breakpoint family member 19 OS=Homo sapiens OX=9606 GN=NBPF19 PE=5 SV=1	1	1	1	1	3843	440.1	4.61	0	97.4	116.1	104	96.3	91.1	95.1	105.833	94.1667	-	1.12389	0.109943
O60499	STX10	Syntaxin-10 OS=Homo sapiens OX=9606 GN=STX10 PE=1 SV=1	18	4	7	3	249	28.1	4.89	96	96.2	96.4	124.8	91	92.6	98.9	105.8	94.1667	-	1.12354	0.300938
Q9P126	CLEC1B	C-type lectin domain family 1 member B OS=Homo sapiens OX=9606 GN=CLEC1B PE=1 SV=2	5	1	1	1	229	26.6	8.5	0	100.2	99.1	118.2	96.7	93.2	92.7	105.833	94.2	-	1.1235	0.139391
Q8NAB2	KBTBD3	Kelch repeat and BTB domain-containing protein 3 OS=Homo sapiens OX=9606 GN=KBTBD3 PE=2 SV=3	1	1	3	1	612	69.8	5.35	50	111.6	103.2	102.6	91.7	94.9	96	105.8	94.2	-	1.12314	0.0217823
Q8WW43	APH1B	Gamma-secretase subunit APH-1B OS=Homo sapiens OX=9606 GN=APH1B PE=1 SV=3	5	1	1	1	257	28.4	9.06	33	107.8	105.1	104.5	100.6	89.6	92.4	105.8	94.2	-	1.12314	0.0283211
A6NCE7	MAP1LC3B2	Microtubule-associated proteins 1A/1B light chain 3 beta 2 OS=Homo sapiens OX=9606 GN=MAP1LC3B2 PE=2 SV=1	11	2	2	2	125	14.6	8.68	14	102.3	108.6	106.5	98.8	90.4	93.4	105.8	94.2	-	1.12314	0.0196131
Q9UHR5	SAP30BP	SAP30-binding protein OS=Homo sapiens OX=9606 GN=SAP30BP PE=1 SV=1	14	4	8	4	308	33.9	4.84	153	102.5	106.2	108.6	94.9	93.1	94.7	105.767	94.2333	-	1.12239	0.00346347
Q6UWP7	LCLAT1	Lysocardiolipin acyltransferase 1 OS=Homo sapiens OX=9606 GN=LCLAT1 PE=1 SV=1	17	8	16	8	414	48.9	8.62	96	105.7	103.6	108	93.8	93.3	95.6	105.767	94.2333	-	1.12239	0.00135289
Q8NAN2	MIGA1	Mitoguardin 1 OS=Homo sapiens OX=9606 GN=MIGA1 PE=1 SV=1	3	1	1	1	632	71	5.63	70	102.7	105.5	109	91.7	88	103	105.733	94.2333	-	1.12204	0.0773706
Q92968	PEX13	Peroxisomal membrane protein PEX13 OS=Homo sapiens OX=9606 GN=PEX13 PE=1 SV=2	5	2	2	2	403	44.1	8.05	53	106.9	111.2	99.2	88.9	97.5	96.4	105.767	94.2667	-	1.12199	0.0602943
Q16706	MAN2A1	Alpha-mannosidase 2 OS=Homo sapiens OX=9606 GN=MAN2A1 PE=1 SV=2	12	15	33	15	1144	131.1	7.58	283	99.2	106.4	111.7	96.3	93.6	92.9	105.767	94.2667	-	1.12199	0.0379443
Q9NUQ9	FAM49B	Protein FAM49B OS=Homo sapiens OX=9606 GN=FAM49B PE=1 SV=1	24	6	11	6	324	36.7	6.06	195	107.5	100.9	108.7	96.2	93.7	92.9	105.7	94.2667	-	1.12129	0.0120358
Q8N0Y2	ZNF444	Zinc finger protein 444 OS=Homo sapiens OX=9606 GN=ZNF444 PE=1 SV=1	3	1	1	1	327	35.2	8.56	0	105.6	109.7	101.9	93.8	92.7	96.4	105.733	94.3	-	1.12124	0.0103138
Q96IW7	SEC22A	Vesicle-trafficking protein SEC22a OS=Homo sapiens OX=9606 GN=SEC22A PE=1 SV=1	10	2	5	2	307	34.9	8.24	120	107.4	105.7	104	91.9	94.7	96.4	105.7	94.3333	-	1.12049	0.00226696
P35637	FUS	RNA-binding protein FUS OS=Homo sapiens OX=9606 GN=FUS PE=1 SV=1	17	10	56	8	526	53.4	9.36	685	102.5	111.3	103.2	94.9	93.8	94.3	105.667	94.3333	-	1.12014	0.01629
Q96LJ7	DHRS1	Dehydrogenase/reductase SDR family member 1 OS=Homo sapiens OX=9606 GN=DHRS1 PE=1 SV=1	25	6	9	6	313	33.9	7.83	164	107.8	102.9	106.3	92.9	93.6	96.6	105.667	94.3667	-	1.11975	0.00357082
Q9UFH2	DNAH17	Dynein heavy chain 17, axonemal OS=Homo sapiens OX=9606 GN=DNAH17 PE=1 SV=3	0	2	2	1	4462	509	5.72	0	112	105.6	99.3	94.4	94	94.7	105.633	94.3667	-	1.11939	0.0373505
Q13137	CALCOCO2	Calcium-binding and coiled-coil domain-containing protein 2 OS=Homo sapiens OX=9606 GN=CALCOCO2 PE=1 SV=1	26	11	16	11	446	52.2	5.02	118	99.9	105.3	111.7	96.8	93	93.3	105.633	94.3667	-	1.11939	0.0358504
Q9H1B7	IRF2BPL	Probable E3 ubiquitin-protein ligase IRF2BPL OS=Homo sapiens OX=9606 GN=IRF2BPL PE=1 SV=1	1	1	1	1	796	82.6	8.24	24	99.4	94.2	123.2	87.5	93.1	102.6	105.6	94.4	-	1.11864	0.323534
P02751	FN1	Fibronectin OS=Homo sapiens OX=9606 GN=FN1 PE=1 SV=5	2	6	8	6	2477	272.2	5.5	111	108.1	103.5	105	93.9	96.1	93.3	105.533	94.4333	-	1.11754	0.00226518
P09651	HNRNPA1	Heterogeneous nuclear ribonucleoprotein A1 OS=Homo sapiens OX=9606 GN=HNRNPA1 PE=1 SV=5	47	20	146	5	372	38.7	9.13	2412	100.2	108.4	108.1	93.8	96.9	92.7	105.567	94.4667	-	1.1175	0.0200482
Q12933	TRAF2	TNF receptor-associated factor 2 OS=Homo sapiens OX=9606 GN=TRAF2 PE=1 SV=2	7	3	3	3	501	55.8	7.53	55	103.5	100.1	113.1	100.9	78.7	103.8	105.567	94.4667	-	1.1175	0.2772
Q9BRJ7	NUDT16L1	Tudor-interacting repair regulator protein OS=Homo sapiens OX=9606 GN=NUDT16L1 PE=1 SV=1	10	2	3	2	211	23.3	8.91	118	107.6	104.3	104.6	91.7	96.6	95.2	105.5	94.5	-	1.1164	0.00361593
Q96CE8	TM4SF18	Transmembrane 4 L6 family member 18 OS=Homo sapiens OX=9606 GN=TM4SF18 PE=2 SV=1	7	1	1	1	201	22.3	7.4	15	111.6	111.3	93.6	96.6	95.1	91.8	105.5	94.5	-	1.1164	0.146543
Q9UDX5	MTFP1	Mitochondrial fission process protein 1 OS=Homo sapiens OX=9606 GN=MTFP1 PE=1 SV=1	21	3	10	3	166	18	9.31	120	115	100.2	101.2	94.2	94.5	94.8	105.467	94.5	-	1.11605	0.0833982
Q15629	TRAM1	Translocating chain-associated membrane protein 1 OS=Homo sapiens OX=9606 GN=TRAM1 PE=1 SV=3	6	2	6	2	374	43	9.63	46	98.7	106.2	111.5	93	96.1	94.4	105.467	94.5	-	1.11605	0.0454237
Q15011	HERPUD1	Homocysteine-responsive endoplasmic reticulum-resident ubiquitin-like domain member 1 protein OS=Homo sapiens OX=9606 GN=HERPUD1 PE=1 SV=1	6	2	3	2	391	43.7	5.25	81	101.3	104.8	110.4	91.1	95.6	96.9	105.5	94.5333	-	1.11601	0.0260817
Q99653	CHP1	Calcineurin B homologous protein 1 OS=Homo sapiens OX=9606 GN=CHP1 PE=1 SV=3	62	11	23	11	195	22.4	5.1	340	107.6	105	103.9	95.4	93.4	94.8	105.5	94.5333	-	1.11601	0.000921465
Q4J6C6	PREPL	Prolyl endopeptidase-like OS=Homo sapiens OX=9606 GN=PREPL PE=1 SV=1	6	5	6	5	727	83.9	6.38	30	107.1	107.7	101.6	94.6	93.8	95.3	105.467	94.5667	-	1.11526	0.00539672
O43752	STX6	Syntaxin-6 OS=Homo sapiens OX=9606 GN=STX6 PE=1 SV=1	17	4	6	3	255	29.2	4.93	55	103.7	103.2	109.4	96.4	91.4	95.9	105.433	94.5667	-	1.11491	0.0129697
Q08431	MFGE8	Lactadherin OS=Homo sapiens OX=9606 GN=MFGE8 PE=1 SV=3	24	9	19	9	387	43.1	8.15	181	107.1	104.1	105.1	98.6	92.8	92.4	105.433	94.6	-	1.11452	0.00776507
Q96AE7	TTC17	Tetratricopeptide repeat protein 17 OS=Homo sapiens OX=9606 GN=TTC17 PE=1 SV=1	7	7	10	7	1141	129.5	6.58	100	107.9	105.1	103.2	95.5	94.5	93.8	105.4	94.6	-	1.11416	0.00174214
P13637	ATP1A3	Sodium/potassium-transporting ATPase subunit alpha-3 OS=Homo sapiens OX=9606 GN=ATP1A3 PE=1 SV=3	18	15	70	2	1013	111.7	5.38	1547	108.6	104.4	103.2	94.7	89.6	99.5	105.4	94.6	-	1.11416	0.0305365
P05106	ITGB3	Integrin beta-3 OS=Homo sapiens OX=9606 GN=ITGB3 PE=1 SV=2	8	5	6	5	788	87	5.24	119	111.4	112.4	92.2	102.2	91.7	90	105.333	94.6333	-	1.11307	0.231922
Q8IW50	FAM219A	Protein FAM219A OS=Homo sapiens OX=9606 GN=FAM219A PE=1 SV=3	9	1	2	1	185	20.4	4.73	37	117.2	92.3	106.6	97.2	94.5	92.3	105.367	94.6667	-	1.11303	0.219275
Q9P0S3	ORMDL1	ORM1-like protein 1 OS=Homo sapiens OX=9606 GN=ORMDL1 PE=1 SV=1	22	3	4	1	153	17.4	9.64	127	103.5	103.8	108.6	98.1	92.5	93.4	105.3	94.6667	-	1.11232	0.0113642
Q8N6M3	FITM2	Fat storage-inducing transmembrane protein 2 OS=Homo sapiens OX=9606 GN=FITM2 PE=1 SV=1	11	3	7	3	262	29.8	8.65	85	106.4	110.6	98.8	98.6	91.2	94.3	105.267	94.7	-	1.11158	0.0601021
Q12893	TMEM115	Transmembrane protein 115 OS=Homo sapiens OX=9606 GN=TMEM115 PE=1 SV=1	11	3	5	3	351	38.2	8.16	50	103	105.2	107.6	96.7	93	94.4	105.267	94.7	-	1.11158	0.00349243
Q13426	XRCC4	DNA repair protein XRCC4 OS=Homo sapiens OX=9606 GN=XRCC4 PE=1 SV=2	7	3	3	3	336	38.3	4.98	29	105.3	98.7	111.8	95.8	92.8	95.6	105.267	94.7333	-	1.11119	0.05419
Q96BI1	SLC22A18	Solute carrier family 22 member 18 OS=Homo sapiens OX=9606 GN=SLC22A18 PE=1 SV=3	6	3	10	3	424	44.8	9.57	81	105.8	106.4	103.6	96.1	93	95.1	105.267	94.7333	-	1.11119	0.00108117
P19338	NCL	Nucleolin OS=Homo sapiens OX=9606 GN=NCL PE=1 SV=3	40	40	212	40	710	76.6	4.7	2422	102.2	114.4	99.2	95.5	94.3	94.4	105.267	94.7333	-	1.11119	0.0868275
Q96J02	ITCH	E3 ubiquitin-protein ligase Itchy homolog OS=Homo sapiens OX=9606 GN=ITCH PE=1 SV=2	3	2	2	2	903	102.7	6.3	61	102	105.2	108.6	90.5	101.1	92.6	105.267	94.7333	-	1.11119	0.0487146
Q8NAT1	POMGNT2	Protein O-linked-mannose beta-1,4-N-acetylglucosaminyltransferase 2 OS=Homo sapiens OX=9606 GN=POMGNT2 PE=1 SV=1	4	2	3	2	580	66.6	8.57	51	104.4	106.2	105.1	91	97.6	95.6	105.233	94.7333	-	1.11084	0.00655876
P36894	BMPR1A	Bone morphogenetic protein receptor type-1A OS=Homo sapiens OX=9606 GN=BMPR1A PE=1 SV=2	3	1	1	1	532	60.2	7.58	29	111.5	102.1	102.1	92.4	96.6	95.2	105.233	94.7333	-	1.11084	0.0356042
Q9P2E9	RRBP1	Ribosome-binding protein 1 OS=Homo sapiens OX=9606 GN=RRBP1 PE=1 SV=5	66	71	186	71	1410	152.4	8.6	2886	100	107.8	107.9	97.6	94.2	92.4	105.233	94.7333	-	1.11084	0.0256539
Q96EY4	TMA16	Translation machinery-associated protein 16 OS=Homo sapiens OX=9606 GN=TMA16 PE=1 SV=2	4	1	1	1	203	23.8	9.26	0	88.5	99.7	127.5	91.4	94.5	98.4	105.233	94.7667	-	1.11045	0.424066
Q7L5D6	GET4	Golgi to ER traffic protein 4 homolog OS=Homo sapiens OX=9606 GN=GET4 PE=1 SV=1	4	1	1	1	327	36.5	5.41	0	104.7	109.7	101.2	91.3	91.8	101.2	105.2	94.7667	-	1.11009	0.0618268
P02647	APOA1	Apolipoprotein A-I OS=Homo sapiens OX=9606 GN=APOA1 PE=1 SV=1	6	1	5	1	267	30.8	5.76	146	119.5	95	101	90.9	94	99.5	105.167	94.8	-	1.10935	0.254058
P02656	APOC3	Apolipoprotein C-III OS=Homo sapiens OX=9606 GN=APOC3 PE=1 SV=1	16	1	1	1	99	10.8	5.41	35	100.6	104.8	110.2	98.4	90.8	95.3	105.2	94.8333	-	1.10931	0.0431617
Q8N3R9	MPP5	MAGUK p55 subfamily member 5 OS=Homo sapiens OX=9606 GN=MPP5 PE=1 SV=3	4	3	4	3	675	77.2	6.14	43	107.8	106.9	100.8	96.6	94.1	93.8	105.167	94.8333	-	1.10896	0.0120811
Q8IXI2	RHOT1	Mitochondrial Rho GTPase 1 OS=Homo sapiens OX=9606 GN=RHOT1 PE=1 SV=2	13	6	8	5	618	70.7	6.27	176	110	106.2	99.3	95.5	94.5	94.5	105.167	94.8333	-	1.10896	0.0304715
P07602	PSAP	Prosaposin OS=Homo sapiens OX=9606 GN=PSAP PE=1 SV=2	34	19	83	19	524	58.1	5.17	826	112.5	103.8	99.2	103.9	90.5	90.1	105.167	94.8333	-	1.10896	0.159111
Q9NQE9	HINT3	Histidine triad nucleotide-binding protein 3 OS=Homo sapiens OX=9606 GN=HINT3 PE=1 SV=1	21	3	4	3	182	20.3	6.6	68	107.2	107.5	100.7	94.9	95.8	93.8	105.133	94.8333	-	1.10861	0.0108815
P50750	CDK9	Cyclin-dependent kinase 9 OS=Homo sapiens OX=9606 GN=CDK9 PE=1 SV=3	16	6	12	4	372	42.8	8.79	77	99.3	108.6	107.5	94.8	96	93.7	105.133	94.8333	-	1.10861	0.0266809
Q96HA1	POM121	Nuclear envelope pore membrane protein POM 121 OS=Homo sapiens OX=9606 GN=POM121 PE=1 SV=2	6	6	9	6	1249	127.6	10.56	110	105.1	105.9	104.5	90.7	97.1	96.8	105.167	94.8667	-	1.10857	0.00834615
P58107	EPPK1	Epiplakin OS=Homo sapiens OX=9606 GN=EPPK1 PE=1 SV=3	7	8	24	3	5088	555.3	5.62	320	98.1	116.7	100.6	81.3	94.6	108.7	105.133	94.8667	-	1.10822	0.355073
Q9NZJ7	MTCH1	Mitochondrial carrier homolog 1 OS=Homo sapiens OX=9606 GN=MTCH1 PE=1 SV=1	13	5	7	5	389	41.5	9.32	93	105.2	108.2	102	96.6	93.1	94.9	105.133	94.8667	-	1.10822	0.00751992
O95562	SFT2D2	Vesicle transport protein SFT2B OS=Homo sapiens OX=9606 GN=SFT2D2 PE=1 SV=1	6	1	3	1	160	17.8	9.13	86	105.5	103.9	106	100.7	93.5	90.4	105.133	94.8667	-	1.10822	0.0300764
Q9Y394	DHRS7	Dehydrogenase/reductase SDR family member 7 OS=Homo sapiens OX=9606 GN=DHRS7 PE=1 SV=1	29	10	15	10	339	38.3	8.32	289	104.4	110.2	100.7	93.1	94.7	96.8	105.1	94.8667	-	1.10787	0.0260212
A8MVJ9		Putative histone PARylation factor 1-like OS=Homo sapiens OX=9606 PE=5 SV=1	3	1	1	1	347	39.7	8.1	0	101.8	107.3	106.2	82.6	102	100	105.1	94.8667	-	1.10787	0.184285
Q8N5M4	TTC9C	Tetratricopeptide repeat protein 9C OS=Homo sapiens OX=9606 GN=TTC9C PE=1 SV=1	9	1	1	1	171	20	8.92	0	112.7	96.3	106.4	94.1	93.2	97.4	105.133	94.9	-	1.10783	0.107255
Q8TAV0	FAM76A	Protein FAM76A OS=Homo sapiens OX=9606 GN=FAM76A PE=2 SV=1	7	2	2	2	307	35	9.19	59	108	106.1	101.2	97.4	92.9	94.4	105.1	94.9	-	1.10748	0.0135211
Q86Y79	PTRH1	Probable peptidyl-tRNA hydrolase OS=Homo sapiens OX=9606 GN=PTRH1 PE=1 SV=1	9	2	3	2	214	22.9	10.56	45	104.3	106.9	104	97.4	95.1	92.2	105.067	94.9	-	1.10713	0.00449557
Q96M96	FGD4	FYVE, RhoGEF and PH domain-containing protein 4 OS=Homo sapiens OX=9606 GN=FGD4 PE=1 SV=2	2	2	2	2	766	86.6	6.13	28	98	102.9	114.3	88.1	97.9	98.9	105.067	94.9667	-	1.10635	0.163835
Q9H2V7	SPNS1	Protein spinster homolog 1 OS=Homo sapiens OX=9606 GN=SPNS1 PE=1 SV=1	12	4	8	4	528	56.6	6.64	113	93.7	109	112.4	92.8	93.6	98.6	105.033	95	-	1.10561	0.171496
P50570	DNM2	Dynamin-2 OS=Homo sapiens OX=9606 GN=DNM2 PE=1 SV=2	8	7	7	7	870	98	7.44	40	105.4	106.4	103.3	96.4	93.7	94.9	105.033	95	-	1.10561	0.00112546
Q9BY76	ANGPTL4	Angiopoietin-related protein 4 OS=Homo sapiens OX=9606 GN=ANGPTL4 PE=1 SV=2	38	11	29	11	406	45.2	8.85	368	113.1	100.3	101.6	98	95	92	105	95	-	1.10526	0.0864849
Q7Z417	NUFIP2	Nuclear fragile X mental retardation-interacting protein 2 OS=Homo sapiens OX=9606 GN=NUFIP2 PE=1 SV=1	13	7	11	7	695	76.1	8.7	133	100.1	108.2	106.7	92.4	95.2	97.4	105	95	-	1.10526	0.0254781
Q9NW81	DMAC2	Distal membrane-arm assembly complex protein 2 OS=Homo sapiens OX=9606 GN=DMAC2 PE=1 SV=3	14	3	3	3	257	29.2	6.43	70	106.7	104.9	103.3	98.5	94.7	91.8	104.967	95	-	1.10491	0.0101546
Q99519	NEU1	Sialidase-1 OS=Homo sapiens OX=9606 GN=NEU1 PE=1 SV=1	12	5	8	5	415	45.4	5.88	38	110.4	100.3	104.2	102.9	91.1	91	104.967	95	-	1.10491	0.112998
Q96D05	FAM241B	Protein FAM241B OS=Homo sapiens OX=9606 GN=FAM241B PE=1 SV=1	11	1	3	1	121	13.2	11.58	20	110.9	100.5	103.5	101.9	91	92.2	104.967	95.0333	-	1.10452	0.0986073
Q6ZSJ8	C1orf122	Uncharacterized protein C1orf122 OS=Homo sapiens OX=9606 GN=C1orf122 PE=4 SV=2	10	1	4	1	110	11.5	6.73	27	105.8	104.4	104.7	91.6	94	99.5	104.967	95.0333	-	1.10452	0.0139251
Q16762	TST	Thiosulfate sulfurtransferase OS=Homo sapiens OX=9606 GN=TST PE=1 SV=4	28	7	11	7	297	33.4	7.25	128	95	91.6	128.3	96.4	96.3	92.5	104.967	95.0667	-	1.10414	0.44791
O75069	TMCC2	Transmembrane and coiled-coil domains protein 2 OS=Homo sapiens OX=9606 GN=TMCC2 PE=1 SV=3	1	1	1	1	709	77.4	6.81	0	105.8	104.9	104.2	95.6	92.7	96.9	104.967	95.0667	-	1.10414	0.00171506
P0DJD1	RGPD2	RANBP2-like and GRIP domain-containing protein 2 OS=Homo sapiens OX=9606 GN=RGPD2 PE=2 SV=1	13	22	47	3	1756	197.2	6.2	583	99.2	107.6	108.1	96.4	93.9	94.9	104.967	95.0667	-	1.10414	0.0292266
Q9NVU7	SDAD1	Protein SDA1 homolog OS=Homo sapiens OX=9606 GN=SDAD1 PE=1 SV=3	9	7	14	7	687	79.8	9.25	120	100.3	109.3	105.2	94	92.7	98.5	104.933	95.0667	-	1.10379	0.0347507
P07858	CTSB	Cathepsin B OS=Homo sapiens OX=9606 GN=CTSB PE=1 SV=3	26	7	30	7	339	37.8	6.3	340	111.2	98.5	105.1	103	91.8	90.4	104.933	95.0667	-	1.10379	0.142649
O75127	PTCD1	Pentatricopeptide repeat-containing protein 1, mitochondrial OS=Homo sapiens OX=9606 GN=PTCD1 PE=1 SV=2	15	9	11	9	700	78.8	8.59	135	104.1	99.1	111.5	96.3	93.6	95.3	104.9	95.0667	-	1.10344	0.0559816
P00491	PNP	Purine nucleoside phosphorylase OS=Homo sapiens OX=9606 GN=PNP PE=1 SV=2	16	3	4	3	289	32.1	6.95	47	106.3	103.4	105	91.5	100.4	93.4	104.9	95.1	-	1.10305	0.0258398
Q13885	TUBB2A	Tubulin beta-2A chain OS=Homo sapiens OX=9606 GN=TUBB2A PE=1 SV=1	34	13	153	2	445	49.9	4.89	1730	104.8	108.3	101.6	100.1	87.9	97.4	104.9	95.1333	-	1.10266	0.0794402
Q6P6C2	ALKBH5	RNA demethylase ALKBH5 OS=Homo sapiens OX=9606 GN=ALKBH5 PE=1 SV=2	9	4	6	4	394	44.2	9.09	70	102.1	108	104.5	95.8	95.5	94.1	104.867	95.1333	-	1.10231	0.00556673
Q92896	GLG1	Golgi apparatus protein 1 OS=Homo sapiens OX=9606 GN=GLG1 PE=1 SV=2	26	32	68	32	1179	134.5	6.9	736	107.3	107	100.3	97.9	94.4	93.1	104.867	95.1333	-	1.10231	0.0225864
P08138	NGFR	Tumor necrosis factor receptor superfamily member 16 OS=Homo sapiens OX=9606 GN=NGFR PE=1 SV=1	4	1	1	1	427	45.2	4.7	30	108.9	92.9	112.7	88.3	91.4	105.7	104.833	95.1333	-	1.10196	0.296921
Q96Q45	TMEM237	Transmembrane protein 237 OS=Homo sapiens OX=9606 GN=TMEM237 PE=1 SV=2	8	3	3	3	408	45.5	6.47	16	96.9	104	113.6	95.4	97.6	92.4	104.833	95.1333	-	1.10196	0.128164
Q15542	TAF5	Transcription initiation factor TFIID subunit 5 OS=Homo sapiens OX=9606 GN=TAF5 PE=1 SV=3	5	3	3	3	800	86.8	5.64	36	105	104.2	105.3	92.7	95	97.8	104.833	95.1667	-	1.10158	0.00306309
Q9Y2Q9	MRPS28	28S ribosomal protein S28, mitochondrial OS=Homo sapiens OX=9606 GN=MRPS28 PE=1 SV=1	20	4	8	4	187	20.8	9.1	24	108.7	98.8	107	89.6	100.5	95.4	104.833	95.1667	-	1.10158	0.0923516
Q9BQC6	MRPL57	Ribosomal protein 63, mitochondrial OS=Homo sapiens OX=9606 GN=MRPL57 PE=1 SV=1	20	2	4	2	102	12.3	11.44	27	110	104.8	99.7	97	97.9	90.6	104.833	95.1667	-	1.10158	0.0618269
Q9BX67	JAM3	Junctional adhesion molecule C OS=Homo sapiens OX=9606 GN=JAM3 PE=1 SV=1	24	6	11	6	310	35	7.59	193	107.6	105.1	101.8	95.2	94	96.4	104.833	95.2	-	1.10119	0.00607861
Q9BQD3	KXD1	KxDL motif-containing protein 1 OS=Homo sapiens OX=9606 GN=KXD1 PE=1 SV=2	4	1	3	1	176	19.7	4.89	0	115.9	98	100.6	100.5	91.6	93.5	104.833	95.2	-	1.10119	0.195505
Q12834	CDC20	Cell division cycle protein 20 homolog OS=Homo sapiens OX=9606 GN=CDC20 PE=1 SV=2	14	6	6	6	499	54.7	9.23	37	101	110.9	102.5	97.9	93.9	93.8	104.8	95.2	-	1.10084	0.0462019
Q9UGN5	PARP2	Poly [ADP-ribose] polymerase 2 OS=Homo sapiens OX=9606 GN=PARP2 PE=1 SV=2	3	2	3	2	583	66.2	8.88	39	95.3	111.4	107.7	93.5	92	100.1	104.8	95.2	-	1.10084	0.153963
O43715	TRIAP1	TP53-regulated inhibitor of apoptosis 1 OS=Homo sapiens OX=9606 GN=TRIAP1 PE=1 SV=1	11	1	1	1	76	8.8	5.48	20	99.3	116.3	98.8	87.4	100.2	98	104.8	95.2	-	1.10084	0.240924
Q9UHW9	SLC12A6	Solute carrier family 12 member 6 OS=Homo sapiens OX=9606 GN=SLC12A6 PE=1 SV=2	8	9	16	4	1150	127.5	7.08	99	104.5	104.5	105.4	95.8	93.2	96.6	104.8	95.2	-	1.10084	0.000851766
Q8N5K1	CISD2	CDGSH iron-sulfur domain-containing protein 2 OS=Homo sapiens OX=9606 GN=CISD2 PE=1 SV=1	56	8	23	8	135	15.3	9.61	246	104.9	106.9	102.6	95.5	94.4	95.7	104.8	95.2	-	1.10084	0.00182626
Q9H6X4	TMEM134	Transmembrane protein 134 OS=Homo sapiens OX=9606 GN=TMEM134 PE=1 SV=1	4	1	1	1	195	21.6	6.54	30	105.4	109.1	100	97.2	93.5	95	104.833	95.2333	-	1.10081	0.0281552
O75182	SIN3B	Paired amphipathic helix protein Sin3b OS=Homo sapiens OX=9606 GN=SIN3B PE=1 SV=2	1	1	1	1	1162	133	6.93	0	100.1	105.3	109	98.6	92.2	94.9	104.8	95.2333	-	1.10046	0.0395671
Q13428	TCOF1	Treacle protein OS=Homo sapiens OX=9606 GN=TCOF1 PE=1 SV=3	22	30	61	30	1488	152	9.04	562	100	105.6	108.7	97.9	94	93.8	104.767	95.2333	-	1.10011	0.0294713
Q9UHL4	DPP7	Dipeptidyl peptidase 2 OS=Homo sapiens OX=9606 GN=DPP7 PE=1 SV=3	7	3	4	3	492	54.3	6.32	37	111.1	101.6	101.6	97.5	93	95.2	104.767	95.2333	-	1.10011	0.0495522
Q9NVC3	SLC38A7	Putative sodium-coupled neutral amino acid transporter 7 OS=Homo sapiens OX=9606 GN=SLC38A7 PE=1 SV=1	5	2	2	2	462	49.9	5.08	17	110.8	97.7	105.7	96.3	93.2	96.2	104.733	95.2333	-	1.09975	0.0737416
Q9Y2W6	TDRKH	Tudor and KH domain-containing protein OS=Homo sapiens OX=9606 GN=TDRKH PE=1 SV=2	18	7	9	7	561	62	5.02	191	106.1	107.5	100.6	95	96.3	94.4	104.733	95.2333	-	1.09975	0.0120677
Q01459	CTBS	Di-N-acetylchitobiase OS=Homo sapiens OX=9606 GN=CTBS PE=1 SV=1	3	1	1	1	385	43.7	6.64	19	113.5	102.8	97.9	108.9	85.7	91.2	104.733	95.2667	-	1.09937	0.321701
P15289	ARSA	Arylsulfatase A OS=Homo sapiens OX=9606 GN=ARSA PE=1 SV=3	8	3	3	3	507	53.6	6.07	16	106.1	106.9	101.2	98.3	90.2	97.3	104.733	95.2667	-	1.09937	0.0382746
P43007	SLC1A4	Neutral amino acid transporter A OS=Homo sapiens OX=9606 GN=SLC1A4 PE=1 SV=1	9	5	16	5	532	55.7	6.25	114	102.7	104.2	107.3	96.4	94.5	95	104.733	95.3	-	1.09899	0.00302251
Q9H1C7	CYSTM1	Cysteine-rich and transmembrane domain-containing protein 1 OS=Homo sapiens OX=9606 GN=CYSTM1 PE=1 SV=1	10	1	4	1	97	10.6	4.32	93	104.4	106.6	103.2	98.1	95.1	92.7	104.733	95.3	-	1.09899	0.00701824
Q9UNP9	PPIE	Peptidyl-prolyl cis-trans isomerase E OS=Homo sapiens OX=9606 GN=PPIE PE=1 SV=1	13	4	6	3	301	33.4	5.6	36	105.2	103.5	105.4	97.2	94.2	94.5	104.7	95.3	-	1.09864	0.00113478
Q14011	CIRBP	Cold-inducible RNA-binding protein OS=Homo sapiens OX=9606 GN=CIRBP PE=1 SV=1	21	3	11	3	172	18.6	9.51	374	99.1	105.5	109.5	96.7	94.9	94.3	104.7	95.3	-	1.09864	0.0391942
Q69YQ0	SPECC1L	Cytospin-A OS=Homo sapiens OX=9606 GN=SPECC1L PE=1 SV=2	6	5	7	4	1117	124.5	5.72	84	106.5	105.8	101.8	88.7	100.5	96.7	104.7	95.3	-	1.09864	0.0673916
Q9H089	LSG1	Large subunit GTPase 1 homolog OS=Homo sapiens OX=9606 GN=LSG1 PE=1 SV=2	25	16	38	16	658	75.2	6.38	269	102.6	106.5	105	98.7	92.4	94.8	104.7	95.3	-	1.09864	0.0121146
Q9BVQ7	SPATA5L1	Spermatogenesis-associated protein 5-like protein 1 OS=Homo sapiens OX=9606 GN=SPATA5L1 PE=1 SV=2	5	3	3	3	753	80.7	8.09	38	116.3	98.5	99.2	101	101	83.9	104.667	95.3	-	1.09829	0.3143
Q5SSJ5	HP1BP3	Heterochromatin protein 1-binding protein 3 OS=Homo sapiens OX=9606 GN=HP1BP3 PE=1 SV=1	28	16	48	16	553	61.2	9.67	524	104.1	103.3	106.6	98	94.3	93.6	104.667	95.3	-	1.09829	0.00516602
Q9HCL2	GPAM	Glycerol-3-phosphate acyltransferase 1, mitochondrial OS=Homo sapiens OX=9606 GN=GPAM PE=1 SV=3	2	1	1	1	828	93.7	7.74	25	100.9	101.3	111.9	89.6	93.5	102.9	104.7	95.3333	-	1.09825	0.154499
O15127	SCAMP2	Secretory carrier-associated membrane protein 2 OS=Homo sapiens OX=9606 GN=SCAMP2 PE=1 SV=2	14	3	9	3	329	36.6	6.1	240	102.7	107.7	103.6	95.1	91.8	99.1	104.667	95.3333	-	1.0979	0.0233061
P15151	PVR	Poliovirus receptor OS=Homo sapiens OX=9606 GN=PVR PE=1 SV=2	10	4	8	4	417	45.3	6.52	106	103.9	105.6	104.5	99.5	91.5	95	104.667	95.3333	-	1.0979	0.0169466
P52747	ZNF143	Zinc finger protein 143 OS=Homo sapiens OX=9606 GN=ZNF143 PE=1 SV=2	5	3	4	3	638	68.9	6.05	26	109.5	93.6	110.9	91.7	97.5	96.8	104.667	95.3333	-	1.0979	0.185332
P08473	MME	Neprilysin OS=Homo sapiens OX=9606 GN=MME PE=1 SV=2	23	17	32	17	750	85.5	5.73	311	101.3	104.4	108.3	97.1	95.5	93.4	104.667	95.3333	-	1.0979	0.0151751
P63151	PPP2R2A	Serine/threonine-protein phosphatase 2A 55 kDa regulatory subunit B alpha isoform OS=Homo sapiens OX=9606 GN=PPP2R2A PE=1 SV=1	8	4	4	4	447	51.7	6.2	27	109.3	100.2	104.5	86.2	100.3	99.5	104.667	95.3333	-	1.0979	0.151497
P98179	RBM3	RNA-binding protein 3 OS=Homo sapiens OX=9606 GN=RBM3 PE=1 SV=1	16	2	4	2	157	17.2	8.91	27	93	97.4	123.5	99.7	91	95.3	104.633	95.3333	-	1.09755	0.398296
P99999	CYCS	Cytochrome c OS=Homo sapiens OX=9606 GN=CYCS PE=1 SV=2	39	5	9	5	105	11.7	9.57	30	98.1	107.4	108.5	81.8	106.1	98.2	104.667	95.3667	-	1.09752	0.303314
Q13823	GNL2	Nucleolar GTP-binding protein 2 OS=Homo sapiens OX=9606 GN=GNL2 PE=1 SV=1	26	17	33	17	731	83.6	9.25	364	103.7	108.2	102.1	98.6	93.6	93.9	104.667	95.3667	-	1.09752	0.0189263
Q9UDY4	DNAJB4	DnaJ homolog subfamily B member 4 OS=Homo sapiens OX=9606 GN=DNAJB4 PE=1 SV=1	18	5	7	4	337	37.8	8.5	156	107.2	104.3	102.4	92.1	95.8	98.2	104.633	95.3667	-	1.09717	0.0147908
Q9Y3Z3	SAMHD1	Deoxynucleoside triphosphate triphosphohydrolase SAMHD1 OS=Homo sapiens OX=9606 GN=SAMHD1 PE=1 SV=2	17	9	13	9	626	72.2	7.14	117	103.4	106.6	103.9	92.2	96.2	97.7	104.633	95.3667	-	1.09717	0.00846665
P14859	POU2F1	POU domain, class 2, transcription factor 1 OS=Homo sapiens OX=9606 GN=POU2F1 PE=1 SV=2	8	4	4	4	743	76.4	6.81	35	103.2	99.3	111.4	94.9	95.2	96	104.633	95.3667	-	1.09717	0.0608206
O75874	IDH1	Isocitrate dehydrogenase [NADP] cytoplasmic OS=Homo sapiens OX=9606 GN=IDH1 PE=1 SV=2	13	6	8	5	414	46.6	7.01	43	115.3	96.1	102.5	95.1	93.9	97.1	104.633	95.3667	-	1.09717	0.180592
Q13416	ORC2	Origin recognition complex subunit 2 OS=Homo sapiens OX=9606 GN=ORC2 PE=1 SV=2	8	5	6	5	577	65.9	6.51	61	102.8	109.8	101.3	93.7	94.7	97.7	104.633	95.3667	-	1.09717	0.032421
Q5SWA1	PPP1R15B	Protein phosphatase 1 regulatory subunit 15B OS=Homo sapiens OX=9606 GN=PPP1R15B PE=1 SV=1	5	2	2	2	713	79.1	4.69	62	99.1	100.4	114.4	94.1	96.2	95.8	104.633	95.3667	-	1.09717	0.133915
Q13286	CLN3	Battenin OS=Homo sapiens OX=9606 GN=CLN3 PE=1 SV=1	4	1	1	1	438	47.6	6.38	0	103.1	105.2	105.4	99.7	93.3	93.1	104.567	95.3667	-	1.09647	0.0158715
P10253	GAA	Lysosomal alpha-glucosidase OS=Homo sapiens OX=9606 GN=GAA PE=1 SV=4	5	4	6	4	952	105.3	6	128	103.9	102.2	107.6	102.7	85.3	98.2	104.567	95.4	-	1.09609	0.168028
Q9HBM0	VEZT	Vezatin OS=Homo sapiens OX=9606 GN=VEZT PE=1 SV=3	3	2	3	2	779	88.6	5.2	43	105.1	105.2	103.4	99	91.7	95.5	104.567	95.4	-	1.09609	0.0137978
Q9HAB3	SLC52A2	Solute carrier family 52, riboflavin transporter, member 2 OS=Homo sapiens OX=9606 GN=SLC52A2 PE=1 SV=1	2	1	3	1	445	45.7	7.15	18	103.2	106.2	104.4	93.5	97.9	94.9	104.6	95.4333	-	1.09605	0.0042248
Q9ULI3	HEG1	Protein HEG homolog 1 OS=Homo sapiens OX=9606 GN=HEG1 PE=1 SV=3	2	2	5	2	1381	147.4	6.18	41	102	102.3	109.5	86.5	107.3	92.5	104.6	95.4333	-	1.09605	0.240106
O00754	MAN2B1	Lysosomal alpha-mannosidase OS=Homo sapiens OX=9606 GN=MAN2B1 PE=1 SV=3	4	3	3	3	1011	113.7	7.28	0	105.9	111.7	96.1	98.3	92.6	95.4	104.567	95.4333	-	1.0957	0.132241
O00165	HAX1	HCLS1-associated protein X-1 OS=Homo sapiens OX=9606 GN=HAX1 PE=1 SV=2	30	7	14	7	279	31.6	4.92	170	101.9	106.9	104.9	95.2	95.8	95.3	104.567	95.4333	-	1.0957	0.00337044
P18827	SDC1	Syndecan-1 OS=Homo sapiens OX=9606 GN=SDC1 PE=1 SV=3	9	2	2	2	310	32.4	4.63	23	102.3	113.8	97.6	98.6	91.4	96.3	104.567	95.4333	-	1.0957	0.157473
Q6FI81	CIAPIN1	Anamorsin OS=Homo sapiens OX=9606 GN=CIAPIN1 PE=1 SV=2	6	2	2	2	312	33.6	5.62	25	112.3	94.8	106.6	98.6	94.7	93	104.567	95.4333	-	1.0957	0.16683
Q15334	LLGL1	Lethal(2) giant larvae protein homolog 1 OS=Homo sapiens OX=9606 GN=LLGL1 PE=1 SV=3	1	1	1	1	1064	115.3	6.29	27	105.6	100	108	94.5	96.2	95.6	104.533	95.4333	-	1.09535	0.0198196
Q5SRI9	MANEA	Glycoprotein endo-alpha-1,2-mannosidase OS=Homo sapiens OX=9606 GN=MANEA PE=1 SV=1	3	2	2	2	462	53.6	9.11	0	97.3	112.1	104.2	99.4	89.2	97.7	104.533	95.4333	-	1.09535	0.161956
Q15906	VPS72	Vacuolar protein sorting-associated protein 72 homolog OS=Homo sapiens OX=9606 GN=VPS72 PE=1 SV=1	10	3	4	3	364	40.6	6.48	25	97.6	104.2	111.8	90	96	100.4	104.533	95.4667	-	1.09497	0.149507
Q8NE86	MCU	Calcium uniporter protein, mitochondrial OS=Homo sapiens OX=9606 GN=MCU PE=1 SV=1	21	8	15	8	351	39.8	8.65	140	107.2	105.6	100.8	102.9	89.7	93.8	104.533	95.4667	-	1.09497	0.105442
Q9Y5Y0	FLVCR1	Feline leukemia virus subgroup C receptor-related protein 1 OS=Homo sapiens OX=9606 GN=FLVCR1 PE=1 SV=1	5	1	1	1	555	59.8	5.97	77	100.5	106.3	106.7	87.9	95.3	103.2	104.5	95.4667	-	1.09462	0.136032
P53365	ARFIP2	Arfaptin-2 OS=Homo sapiens OX=9606 GN=ARFIP2 PE=1 SV=1	10	3	4	3	341	37.8	6.04	39	111.2	99.4	103	93.7	92	100.8	104.533	95.5	-	1.09459	0.109935
P01116	KRAS	GTPase KRas OS=Homo sapiens OX=9606 GN=KRAS PE=1 SV=1	33	6	23	3	189	21.6	6.77	378	105.6	108.3	99.6	97.3	93.9	95.3	104.5	95.5	-	1.09424	0.0308406
Q96JM3	CHAMP1	Chromosome alignment-maintaining phosphoprotein 1 OS=Homo sapiens OX=9606 GN=CHAMP1 PE=1 SV=2	16	11	12	11	812	89	8.44	96	103.5	106.2	103.8	94.5	97.3	94.7	104.5	95.5	-	1.09424	0.00192688
Q9Y6M5	SLC30A1	Zinc transporter 1 OS=Homo sapiens OX=9606 GN=SLC30A1 PE=1 SV=3	21	8	15	8	507	55.3	6.48	231	107.3	102.3	103.9	96.6	95.5	94.4	104.5	95.5	-	1.09424	0.00497032
P50897	PPT1	Palmitoyl-protein thioesterase 1 OS=Homo sapiens OX=9606 GN=PPT1 PE=1 SV=1	26	7	17	7	306	34.2	6.52	263	110.7	100	102.8	100.2	93.1	93.2	104.5	95.5	-	1.09424	0.0861881
Q15758	SLC1A5	Neutral amino acid transporter B(0) OS=Homo sapiens OX=9606 GN=SLC1A5 PE=1 SV=2	17	7	24	7	541	56.6	5.48	312	103.5	107	102.9	95.6	94.4	96.5	104.467	95.5	-	1.09389	0.0031818
P35251	RFC1	Replication factor C subunit 1 OS=Homo sapiens OX=9606 GN=RFC1 PE=1 SV=4	8	9	14	9	1148	128.2	9.36	115	105.6	106.9	100.9	96.2	96	94.4	104.467	95.5333	-	1.09351	0.00945636
O15484	CAPN5	Calpain-5 OS=Homo sapiens OX=9606 GN=CAPN5 PE=1 SV=2	4	2	2	2	640	73.1	7.64	0	112	103.2	98.2	98.4	97	91.2	104.467	95.5333	-	1.09351	0.123884
Q9BX73	TM2D2	TM2 domain-containing protein 2 OS=Homo sapiens OX=9606 GN=TM2D2 PE=2 SV=1	6	1	1	1	214	22.9	4.97	0	97.2	109.8	106.4	98.2	95.3	93.1	104.467	95.5333	-	1.09351	0.0916669
Q93063	EXT2	Exostosin-2 OS=Homo sapiens OX=9606 GN=EXT2 PE=1 SV=1	7	5	12	5	718	82.2	6.55	51	105	105.3	103.1	98.3	93.5	94.8	104.467	95.5333	-	1.09351	0.00493581
Q96CP7	TLCD1	TLC domain-containing protein 1 OS=Homo sapiens OX=9606 GN=TLCD1 PE=2 SV=1	7	2	2	2	247	28.5	9.47	26	95.2	100.2	118	87.7	102.2	96.7	104.467	95.5333	-	1.09351	0.332366
P06748	NPM1	Nucleophosmin OS=Homo sapiens OX=9606 GN=NPM1 PE=1 SV=2	45	12	170	12	294	32.6	4.78	2479	103	107.9	102.5	93.3	97.1	96.3	104.467	95.5667	-	1.09313	0.0127543
Q14331	FRG1	Protein FRG1 OS=Homo sapiens OX=9606 GN=FRG1 PE=1 SV=1	12	3	4	3	258	29.2	9.01	58	96.9	101.4	115	94	95.6	97.1	104.433	95.5667	-	1.09278	0.183098
O43909	EXTL3	Exostosin-like 3 OS=Homo sapiens OX=9606 GN=EXTL3 PE=1 SV=1	1	1	1	1	919	104.7	6.51	0	105.7	102.9	104.7	94.7	96.3	95.7	104.433	95.5667	-	1.09278	0.000712456
Q6UXN9	WDR82	WD repeat-containing protein 82 OS=Homo sapiens OX=9606 GN=WDR82 PE=1 SV=1	16	6	7	6	313	35.1	7.69	24	97.3	106.8	109.2	92	98	96.7	104.433	95.5667	-	1.09278	0.0946012
P63165	SUMO1	Small ubiquitin-related modifier 1 OS=Homo sapiens OX=9606 GN=SUMO1 PE=1 SV=1	24	2	2	2	101	11.6	5.52	0	98.5	103.5	111.3	95.9	96.4	94.4	104.433	95.5667	-	1.09278	0.0784893
P27694	RPA1	Replication protein A 70 kDa DNA-binding subunit OS=Homo sapiens OX=9606 GN=RPA1 PE=1 SV=2	29	18	39	18	616	68.1	7.21	470	102.2	104.5	106.6	89.4	100	97.3	104.433	95.5667	-	1.09278	0.060748
P51608	MECP2	Methyl-CpG-binding protein 2 OS=Homo sapiens OX=9606 GN=MECP2 PE=1 SV=1	23	9	19	9	486	52.4	9.95	310	106	105.6	101.6	97.6	94.3	94.8	104.4	95.5667	-	1.09243	0.00709817
Q6ZN17	LIN28B	Protein lin-28 homolog B OS=Homo sapiens OX=9606 GN=LIN28B PE=1 SV=1	4	1	1	1	250	27.1	8.91	20	105.8	116.3	91.1	94.3	94.9	97.5	104.4	95.5667	-	1.09243	0.297076
Q15326	ZMYND11	Zinc finger MYND domain-containing protein 11 OS=Homo sapiens OX=9606 GN=ZMYND11 PE=1 SV=2	4	3	4	3	602	70.9	8.53	32	105.9	102.7	104.7	98.2	93.6	95	104.433	95.6	-	1.0924	0.00587923
P84095	RHOG	Rho-related GTP-binding protein RhoG OS=Homo sapiens OX=9606 GN=RHOG PE=1 SV=1	50	8	37	7	191	21.3	8.12	898	99.4	103.5	110.3	96.2	95.4	95.2	104.4	95.6	-	1.09205	0.0510673
Q01167	FOXK2	Forkhead box protein K2 OS=Homo sapiens OX=9606 GN=FOXK2 PE=1 SV=3	6	5	6	4	660	69	9.54	26	107.7	102.2	103.2	90.3	97.1	99.4	104.367	95.6	-	1.0917	0.0525319
O95298	NDUFC2	NADH dehydrogenase [ubiquinone] 1 subunit C2 OS=Homo sapiens OX=9606 GN=NDUFC2 PE=1 SV=1	38	6	11	6	119	14.2	8.98	54	103.3	107.7	102.1	96.7	95.3	94.8	104.367	95.6	-	1.0917	0.00813343
P40855	PEX19	Peroxisomal biogenesis factor 19 OS=Homo sapiens OX=9606 GN=PEX19 PE=1 SV=1	25	6	11	6	299	32.8	4.34	103	106.6	107.1	99.5	95.4	95	96.5	104.4	95.6333	-	1.09167	0.024586
Q9BTY2	FUCA2	Plasma alpha-L-fucosidase OS=Homo sapiens OX=9606 GN=FUCA2 PE=1 SV=2	2	1	1	1	467	54	6.25	0	109.3	100.1	103.8	99.9	90.3	96.7	104.4	95.6333	-	1.09167	0.0871174
Q86SQ9	DHDDS	Dehydrodolichyl diphosphate synthase complex subunit DHDDS OS=Homo sapiens OX=9606 GN=DHDDS PE=1 SV=3	3	1	1	1	333	38.6	8.28	0	100.3	102.9	109.9	90	101.1	95.8	104.367	95.6333	-	1.09132	0.1121
Q92804	TAF15	TATA-binding protein-associated factor 2N OS=Homo sapiens OX=9606 GN=TAF15 PE=1 SV=1	26	9	39	7	592	61.8	8.02	421	100.9	103.7	108.5	95	96.3	95.6	104.367	95.6333	-	1.09132	0.0178366
Q70CQ3	USP30	Ubiquitin carboxyl-terminal hydrolase 30 OS=Homo sapiens OX=9606 GN=USP30 PE=1 SV=1	2	1	1	1	517	58.5	8.27	13	105.6	102	105.4	96.9	98	92	104.333	95.6333	-	1.09097	0.0163286
Q9H173	SIL1	Nucleotide exchange factor SIL1 OS=Homo sapiens OX=9606 GN=SIL1 PE=1 SV=1	9	4	7	4	461	52.1	5.36	27	109.4	98.9	104.8	98.7	93.7	94.6	104.367	95.6667	-	1.09094	0.0630266
P60604	UBE2G2	Ubiquitin-conjugating enzyme E2 G2 OS=Homo sapiens OX=9606 GN=UBE2G2 PE=1 SV=1	15	2	3	2	165	18.6	4.7	25	104.7	101.4	106.9	98.6	94.5	93.9	104.333	95.6667	-	1.09059	0.0163656
Q99816	TSG101	Tumor susceptibility gene 101 protein OS=Homo sapiens OX=9606 GN=TSG101 PE=1 SV=2	7	3	3	3	390	43.9	6.46	52	110.9	94.1	108	86.9	100.6	99.6	104.333	95.7	-	1.09021	0.273434
Q8TAA9	VANGL1	Vang-like protein 1 OS=Homo sapiens OX=9606 GN=VANGL1 PE=1 SV=1	8	3	4	3	524	59.9	8.81	26	102.2	109.4	101.3	96.7	92.2	98.2	104.3	95.7	-	1.08986	0.0516726
Q15118	PDK1	[Pyruvate dehydrogenase (acetyl-transferring)] kinase isozyme 1, mitochondrial OS=Homo sapiens OX=9606 GN=PDK1 PE=1 SV=1	5	2	3	2	436	49.2	8.81	24	108.7	102.9	101.3	95.2	96.9	95	104.3	95.7	-	1.08986	0.020924
Q8IYB3	SRRM1	Serine/arginine repetitive matrix protein 1 OS=Homo sapiens OX=9606 GN=SRRM1 PE=1 SV=2	11	8	18	8	904	102.3	11.84	210	106.9	102.3	103.7	102.6	92.6	91.9	104.3	95.7	-	1.08986	0.0815543
Q99571	P2RX4	P2X purinoceptor 4 OS=Homo sapiens OX=9606 GN=P2RX4 PE=1 SV=2	8	3	4	3	388	43.3	7.99	97	105.3	106.1	101.5	105.5	93.4	88.2	104.3	95.7	-	1.08986	0.181127
P0DJ07	PET100	Protein PET100 homolog, mitochondrial OS=Homo sapiens OX=9606 GN=PET100 PE=1 SV=1	14	2	2	2	73	9.1	6.77	0	98.9	111.2	102.8	98.8	99.6	88.8	104.3	95.7333	-	1.08948	0.16337
Q68D85	NCR3LG1	Natural cytotoxicity triggering receptor 3 ligand 1 OS=Homo sapiens OX=9606 GN=NCR3LG1 PE=1 SV=1	6	3	3	3	454	50.8	5.59	49	100.2	107.7	105	95.2	96.6	95.4	104.3	95.7333	-	1.08948	0.0186069
P55268	LAMB2	Laminin subunit beta-2 OS=Homo sapiens OX=9606 GN=LAMB2 PE=1 SV=2	8	12	15	12	1798	195.9	6.52	172	105.5	97.4	109.9	98.4	93.3	95.5	104.267	95.7333	-	1.08914	0.0967001
Q9BZQ6	EDEM3	ER degradation-enhancing alpha-mannosidase-like protein 3 OS=Homo sapiens OX=9606 GN=EDEM3 PE=1 SV=2	5	4	5	4	932	104.6	4.93	0	97.2	102.6	113	97	94.6	95.6	104.267	95.7333	-	1.08914	0.142869
Q7Z2K8	GPRIN1	G protein-regulated inducer of neurite outgrowth 1 OS=Homo sapiens OX=9606 GN=GPRIN1 PE=1 SV=2	6	6	7	6	1008	102.3	8.06	38	105.5	103.6	103.7	103.4	91.7	92.1	104.267	95.7333	-	1.08914	0.0929841
Q9H4K7	MTG2	Mitochondrial ribosome-associated GTPase 2 OS=Homo sapiens OX=9606 GN=MTG2 PE=1 SV=1	4	1	1	1	406	43.9	9.45	45	104	104.6	104.3	96.9	91.1	99.3	104.3	95.7667	-	1.08911	0.0249635
P35237	SERPINB6	Serpin B6 OS=Homo sapiens OX=9606 GN=SERPINB6 PE=1 SV=3	8	2	4	2	376	42.6	5.27	51	112.2	89.4	111.2	98.1	91.1	98.1	104.267	95.7667	-	1.08876	0.336875
P21127	CDK11B	Cyclin-dependent kinase 11B OS=Homo sapiens OX=9606 GN=CDK11B PE=1 SV=4	19	16	38	16	795	92.6	5.54	179	98.2	105.9	108.7	95.5	94.6	97.2	104.267	95.7667	-	1.08876	0.0581104
Q8WXA9	SREK1	Splicing regulatory glutamine/lysine-rich protein 1 OS=Homo sapiens OX=9606 GN=SREK1 PE=1 SV=1	11	5	12	5	508	59.3	10.39	228	102.8	105.4	104.5	97.9	95.2	94.2	104.233	95.7667	-	1.08841	0.00323162
O75882	ATRN	Attractin OS=Homo sapiens OX=9606 GN=ATRN PE=1 SV=2	2	4	4	4	1429	158.4	7.31	54	107.7	104.2	100.7	101.7	93.1	92.5	104.2	95.7667	-	1.08806	0.0787972
Q9H019	MTFR1L	Mitochondrial fission regulator 1-like OS=Homo sapiens OX=9606 GN=MTFR1L PE=1 SV=2	15	3	3	3	292	31.9	6.1	75	108.8	98	105.9	103.2	92.2	92	104.233	95.8	-	1.08803	0.161003
Q8N6I1	EID2	EP300-interacting inhibitor of differentiation 2 OS=Homo sapiens OX=9606 GN=EID2 PE=1 SV=3	7	1	1	1	236	25.2	7.46	14	106.6	94.6	111.5	91	94.5	101.9	104.233	95.8	-	1.08803	0.230004
Q53S08	RAB6D	Ras-related protein Rab-6D OS=Homo sapiens OX=9606 GN=RAB6D PE=2 SV=1	13	3	11	1	254	28.2	6.74	273	104.5	106.6	101.6	94.3	92.6	100.5	104.233	95.8	-	1.08803	0.0396588
Q92805	GOLGA1	Golgin subfamily A member 1 OS=Homo sapiens OX=9606 GN=GOLGA1 PE=1 SV=3	11	7	8	7	767	88.1	5.27	54	102.4	105.5	104.7	98	93.2	96.2	104.2	95.8	-	1.08768	0.00749482
Q14651	PLS1	Plastin-1 OS=Homo sapiens OX=9606 GN=PLS1 PE=1 SV=2	12	7	16	5	629	70.2	5.41	88	109.3	100.6	102.7	97.1	93.7	96.6	104.2	95.8	-	1.08768	0.0411
Q9Y4E5	ZNF451	E3 SUMO-protein ligase ZNF451 OS=Homo sapiens OX=9606 GN=ZNF451 PE=1 SV=2	1	1	1	1	1061	121.4	6.77	0	99.6	108.3	104.7	94.9	96.6	95.9	104.2	95.8	-	1.08768	0.0308939
O43463	SUV39H1	Histone-lysine N-methyltransferase SUV39H1 OS=Homo sapiens OX=9606 GN=SUV39H1 PE=1 SV=1	11	5	6	5	412	47.9	8.03	52	104.6	106	102	95.3	95.8	96.3	104.2	95.8	-	1.08768	0.00223989
P00492	HPRT1	Hypoxanthine-guanine phosphoribosyltransferase OS=Homo sapiens OX=9606 GN=HPRT1 PE=1 SV=2	6	1	1	1	218	24.6	6.68	24	106.8	93.6	112.2	97.1	92.1	98.2	104.2	95.8	-	1.08768	0.223374
Q9BVK6	TMED9	Transmembrane emp24 domain-containing protein 9 OS=Homo sapiens OX=9606 GN=TMED9 PE=1 SV=2	29	7	25	5	235	27.3	8.02	304	103	108.4	101.2	99.7	93.5	94.2	104.2	95.8	-	1.08768	0.0451388
Q00973	B4GALNT1	Beta-1,4 N-acetylgalactosaminyltransferase 1 OS=Homo sapiens OX=9606 GN=B4GALNT1 PE=1 SV=2	7	3	3	3	533	58.8	8.69	21	103.1	97.2	112.2	96.9	86.5	104.1	104.167	95.8333	-	1.08696	0.282601
Q7Z2K6	ERMP1	Endoplasmic reticulum metallopeptidase 1 OS=Homo sapiens OX=9606 GN=ERMP1 PE=1 SV=2	9	8	19	8	904	100.2	7.52	167	106.8	107.5	98.2	94.5	91.5	101.5	104.167	95.8333	-	1.08696	0.118842
O75592	MYCBP2	E3 ubiquitin-protein ligase MYCBP2 OS=Homo sapiens OX=9606 GN=MYCBP2 PE=1 SV=4	0	2	2	2	4678	513.3	7.02	20	111.3	102.1	99.1	98.6	94.5	94.4	104.167	95.8333	-	1.08696	0.100827
P51116	FXR2	Fragile X mental retardation syndrome-related protein 2 OS=Homo sapiens OX=9606 GN=FXR2 PE=1 SV=2	23	13	36	10	673	74.2	6.23	391	101.9	105.2	105.4	97	95.9	94.6	104.167	95.8333	-	1.08696	0.00331059
Q86SJ2	AMIGO2	Amphoterin-induced protein 2 OS=Homo sapiens OX=9606 GN=AMIGO2 PE=1 SV=1	6	2	2	2	522	57.9	8.4	19	104.5	104.3	103.6	100.3	96.3	90.9	104.133	95.8333	-	1.08661	0.038693
P49795	RGS19	Regulator of G-protein signaling 19 OS=Homo sapiens OX=9606 GN=RGS19 PE=1 SV=1	6	1	1	1	217	24.6	5.62	36	95.6	98.3	118.5	100.1	92.1	95.4	104.133	95.8667	-	1.08623	0.337263
Q96EV2	RBM33	RNA-binding protein 33 OS=Homo sapiens OX=9606 GN=RBM33 PE=1 SV=3	2	1	1	1	1170	129.9	6.93	13	100.9	106.8	104.7	94.3	94.5	98.8	104.133	95.8667	-	1.08623	0.0218129
P09601	HMOX1	Heme oxygenase 1 OS=Homo sapiens OX=9606 GN=HMOX1 PE=1 SV=1	29	6	10	6	288	32.8	8.25	185	109.2	101.9	101.2	94.2	95	98.4	104.1	95.8667	-	1.08588	0.0452397
Q7RTP0	NIPA1	Magnesium transporter NIPA1 OS=Homo sapiens OX=9606 GN=NIPA1 PE=1 SV=1	9	2	3	2	329	34.5	8.37	48	100.5	111.1	100.8	94.6	94.8	98.3	104.133	95.9	-	1.08585	0.0892283
P04114	APOB	Apolipoprotein B-100 OS=Homo sapiens OX=9606 GN=APOB PE=1 SV=2	1	5	9	4	4563	515.3	7.05	33	97.5	91	123.9	96.6	95.1	96	104.133	95.9	-	1.08585	0.459455
Q9BUK0	CHCHD7	Coiled-coil-helix-coiled-coil-helix domain-containing protein 7 OS=Homo sapiens OX=9606 GN=CHCHD7 PE=1 SV=1	21	1	1	1	85	10.1	8.82	35	98.8	103.2	110.3	89.8	94.9	103	104.1	95.9	-	1.08551	0.183038
Q969S2	NEIL2	Endonuclease 8-like 2 OS=Homo sapiens OX=9606 GN=NEIL2 PE=1 SV=3	5	1	1	1	332	36.8	6.79	14	103.7	106.3	102.3	98.2	96	93.5	104.1	95.9	-	1.08551	0.0102449
Q7L590	MCM10	Protein MCM10 homolog OS=Homo sapiens OX=9606 GN=MCM10 PE=1 SV=2	1	1	1	1	875	98.1	8.75	0	100.6	110.1	101.6	97.4	93	97.3	104.1	95.9	-	1.08551	0.0703181
Q9H0P0	NT5C3A	Cytosolic 5'-nucleotidase 3A OS=Homo sapiens OX=9606 GN=NT5C3A PE=1 SV=3	18	5	10	5	336	37.9	7.12	138	102.4	103.1	106.8	93.7	95.6	98.4	104.1	95.9	-	1.08551	0.0131823
Q8IXU6	SLC35F2	Solute carrier family 35 member F2 OS=Homo sapiens OX=9606 GN=SLC35F2 PE=1 SV=1	17	3	11	3	374	41.2	6.21	412	106.8	109.4	96.1	98.3	93.8	95.6	104.1	95.9	-	1.08551	0.127528
P17028	ZNF24	Zinc finger protein 24 OS=Homo sapiens OX=9606 GN=ZNF24 PE=1 SV=4	8	2	3	2	368	42.1	6.21	83	103.4	107	101.8	94	99.1	94.6	104.067	95.9	-	1.08516	0.02141
Q96SN8	CDK5RAP2	CDK5 regulatory subunit-associated protein 2 OS=Homo sapiens OX=9606 GN=CDK5RAP2 PE=1 SV=5	1	1	2	1	1893	214.9	5.58	49	103.2	105.6	103.5	89.9	96.2	101.7	104.1	95.9333	-	1.08513	0.0794685
Q9Y3B6	EMC9	ER membrane protein complex subunit 9 OS=Homo sapiens OX=9606 GN=EMC9 PE=1 SV=3	11	2	4	2	208	23	5.91	61	102.7	102.9	106.6	99.8	92.8	95.2	104.067	95.9333	-	1.08478	0.0280498
Q96MX3	ZNF48	Zinc finger protein 48 OS=Homo sapiens OX=9606 GN=ZNF48 PE=1 SV=2	3	1	1	1	618	67.8	9.36	19	102	104.1	106.1	92.7	95.3	99.8	104.067	95.9333	-	1.08478	0.0271267
Q9UNQ2	DIMT1	Probable dimethyladenosine transferase OS=Homo sapiens OX=9606 GN=DIMT1 PE=1 SV=1	29	9	14	9	313	35.2	9.99	80	102.3	106.4	103.5	94.2	97.3	96.3	104.067	95.9333	-	1.08478	0.00590575
Q9NS00	C1GALT1	Glycoprotein-N-acetylgalactosamine 3-beta-galactosyltransferase 1 OS=Homo sapiens OX=9606 GN=C1GALT1 PE=1 SV=1	7	2	4	2	363	42.2	6.64	67	101.3	105.5	105.3	95.4	97.5	94.9	104.033	95.9333	-	1.08443	0.00689951
Q8WWQ0	PHIP	PH-interacting protein OS=Homo sapiens OX=9606 GN=PHIP PE=1 SV=2	7	12	20	12	1821	206.6	8.85	259	102.9	103.6	105.6	96.2	96.1	95.5	104.033	95.9333	-	1.08443	0.0006409
Q9HAV0	GNB4	Guanine nucleotide-binding protein subunit beta-4 OS=Homo sapiens OX=9606 GN=GNB4 PE=1 SV=3	29	9	43	4	340	37.5	6	713	104	96.4	111.8	90.3	101.4	96.2	104.067	95.9667	-	1.0844	0.213547
Q8N9F7	GDPD1	Lysophospholipase D GDPD1 OS=Homo sapiens OX=9606 GN=GDPD1 PE=1 SV=2	2	1	1	1	314	36.1	8.47	32	114.1	103.9	94.2	97	97	93.9	104.067	95.9667	-	1.0844	0.237558
Q9H000	MKRN2	Probable E3 ubiquitin-protein ligase makorin-2 OS=Homo sapiens OX=9606 GN=MKRN2 PE=1 SV=2	6	3	3	3	416	46.9	7.61	29	108.1	101.6	102.4	94.5	98.9	94.5	104.033	95.9667	-	1.08406	0.0327768
O94923	GLCE	D-glucuronyl C5-epimerase OS=Homo sapiens OX=9606 GN=GLCE PE=1 SV=3	13	6	8	6	617	70.1	8.97	179	103.7	105.3	103.1	96.6	95.1	96.2	104.033	95.9667	-	1.08406	0.00053149
Q9NUN5	LMBRD1	Probable lysosomal cobalamin transporter OS=Homo sapiens OX=9606 GN=LMBRD1 PE=1 SV=1	3	1	2	1	540	61.3	7.77	76	95.4	113	103.6	97.2	102.3	88.4	104	95.9667	-	1.08371	0.284527
P07099	EPHX1	Epoxide hydrolase 1 OS=Homo sapiens OX=9606 GN=EPHX1 PE=1 SV=1	27	12	29	12	455	52.9	7.25	336	107.1	102.3	102.6	96	95.5	96.4	104	95.9667	-	1.08371	0.0069658
Q9UN37	VPS4A	Vacuolar protein sorting-associated protein 4A OS=Homo sapiens OX=9606 GN=VPS4A PE=1 SV=1	11	5	8	2	437	48.9	7.8	26	104.7	103.6	103.7	94	98.4	95.5	104	95.9667	-	1.08371	0.00387654
Q9BRR3	TMEM246	Transmembrane protein 246 OS=Homo sapiens OX=9606 GN=TMEM246 PE=1 SV=1	12	4	6	4	403	46.6	7.59	83	104.9	105.2	102	96.9	96.2	94.9	104.033	96	-	1.08368	0.00240672
Q6P4E1	CASC4	Protein CASC4 OS=Homo sapiens OX=9606 GN=CASC4 PE=1 SV=2	19	7	10	7	436	49.5	5.29	90	103	102.6	106.4	95.1	95	97.9	104	96	-	1.08333	0.00646614
Q99755	PIP5K1A	Phosphatidylinositol 4-phosphate 5-kinase type-1 alpha OS=Homo sapiens OX=9606 GN=PIP5K1A PE=1 SV=1	13	7	8	7	562	62.6	8.21	44	101.5	106.1	104.4	97.7	94.2	96.1	104	96	-	1.08333	0.00891626
Q969V5	MUL1	Mitochondrial ubiquitin ligase activator of NFKB 1 OS=Homo sapiens OX=9606 GN=MUL1 PE=1 SV=1	11	5	6	5	352	39.8	8.13	36	105.2	104.6	102.2	95.4	95.2	97.4	104	96	-	1.08333	0.00227843
O95210	STBD1	Starch-binding domain-containing protein 1 OS=Homo sapiens OX=9606 GN=STBD1 PE=1 SV=1	4	2	3	2	358	39	5.73	50	106	105.8	100.2	100.6	95.1	92.3	104	96	-	1.08333	0.0608225
O95218	ZRANB2	Zinc finger Ran-binding domain-containing protein 2 OS=Homo sapiens OX=9606 GN=ZRANB2 PE=1 SV=2	26	7	9	7	330	37.4	10.01	89	103.3	103.2	105.5	97	97.4	93.6	104	96	-	1.08333	0.00488564
P55265	ADAR	Double-stranded RNA-specific adenosine deaminase OS=Homo sapiens OX=9606 GN=ADAR PE=1 SV=4	21	25	41	25	1226	136	8.65	297	106.6	104.7	100.7	96.9	94.7	96.4	104	96	-	1.08333	0.0126788
Q86U38	NOP9	Nucleolar protein 9 OS=Homo sapiens OX=9606 GN=NOP9 PE=1 SV=1	8	4	4	4	636	69.4	7.28	31	97.2	110.6	104.2	99.2	93.8	95	104	96	-	1.08333	0.129633
P04181	OAT	Ornithine aminotransferase, mitochondrial OS=Homo sapiens OX=9606 GN=OAT PE=1 SV=1	37	14	51	14	439	48.5	7.03	748	104	105.1	102.9	96.6	95.2	96.2	104	96	-	1.08333	0.000459191
Q8TAT6	NPLOC4	Nuclear protein localization protein 4 homolog OS=Homo sapiens OX=9606 GN=NPLOC4 PE=1 SV=3	20	11	21	11	608	68.1	6.38	279	105.9	98.2	107.8	98.8	97.6	91.6	103.967	96	-	1.08299	0.0966399
Q15172	PPP2R5A	Serine/threonine-protein phosphatase 2A 56 kDa regulatory subunit alpha isoform OS=Homo sapiens OX=9606 GN=PPP2R5A PE=1 SV=1	3	1	1	1	486	56.2	6.71	25	102.4	100.2	109.3	99.6	95.6	92.8	103.967	96	-	1.08299	0.0777716
P35914	HMGCL	Hydroxymethylglutaryl-CoA lyase, mitochondrial OS=Homo sapiens OX=9606 GN=HMGCL PE=1 SV=2	22	7	21	7	325	34.3	8.54	210	108.5	102.2	101.2	99.7	94	94.3	103.967	96	-	1.08299	0.0536163
Q92545	TMEM131	Transmembrane protein 131 OS=Homo sapiens OX=9606 GN=TMEM131 PE=1 SV=3	1	2	3	2	1883	205	8.59	39	103.4	106	102.5	98.9	93.7	95.4	103.967	96	-	1.08299	0.0127203
P31327	CPS1	Carbamoyl-phosphate synthase [ammonia], mitochondrial OS=Homo sapiens OX=9606 GN=CPS1 PE=1 SV=2	2	5	7	2	1500	164.8	6.74	0	108.5	90.3	113.2	93.6	103.3	91.2	104	96.0333	-	1.08296	0.370412
Q9H8H2	DDX31	Probable ATP-dependent RNA helicase DDX31 OS=Homo sapiens OX=9606 GN=DDX31 PE=1 SV=2	7	6	8	6	851	94	9.99	113	105.4	104.7	101.8	95.4	95.4	97.3	103.967	96.0333	-	1.08261	0.003358
Q9BVS5	TRMT61B	tRNA (adenine(58)-N(1))-methyltransferase, mitochondrial OS=Homo sapiens OX=9606 GN=TRMT61B PE=1 SV=2	12	5	6	5	477	52.9	6.62	52	105.8	105.9	100.2	93.3	96.2	98.6	103.967	96.0333	-	1.08261	0.0308666
Q96J42	TXNDC15	Thioredoxin domain-containing protein 15 OS=Homo sapiens OX=9606 GN=TXNDC15 PE=1 SV=1	9	2	2	2	360	39.9	4.83	81	100.2	98.6	113.1	96.7	99.9	91.5	103.967	96.0333	-	1.08261	0.201922
P20248	CCNA2	Cyclin-A2 OS=Homo sapiens OX=9606 GN=CCNA2 PE=1 SV=2	10	3	3	3	432	48.5	6.54	50	96.5	110.1	105.2	92.4	93.2	102.5	103.933	96.0333	-	1.08226	0.198448
P42261	GRIA1	Glutamate receptor 1 OS=Homo sapiens OX=9606 GN=GRIA1 PE=1 SV=2	1	1	6	1	906	101.4	7.71	24	108.3	102.8	100.7	93.2	97.8	97.1	103.933	96.0333	-	1.08226	0.0420614
Q13363	CTBP1	C-terminal-binding protein 1 OS=Homo sapiens OX=9606 GN=CTBP1 PE=1 SV=2	24	11	20	7	440	47.5	6.77	151	104.9	103.3	103.6	100.7	94.8	92.6	103.933	96.0333	-	1.08226	0.0328528
Q96SQ9	CYP2S1	Cytochrome P450 2S1 OS=Homo sapiens OX=9606 GN=CYP2S1 PE=1 SV=2	13	6	6	6	504	55.8	8.62	95	106.8	104.9	100.2	98.8	94.2	95.2	103.967	96.0667	-	1.08223	0.0304832
Q13427	PPIG	Peptidyl-prolyl cis-trans isomerase G OS=Homo sapiens OX=9606 GN=PPIG PE=1 SV=2	13	9	16	9	754	88.6	10.29	189	101.4	105.2	105.2	98.9	95.8	93.5	103.933	96.0667	-	1.08189	0.0174246
Q2KHR3	QSER1	Glutamine and serine-rich protein 1 OS=Homo sapiens OX=9606 GN=QSER1 PE=1 SV=3	0	1	1	1	1735	189.9	7.08	24	103.7	112.1	96	95.4	91.1	101.7	103.933	96.0667	-	1.08189	0.23111
Q9BTU6	PI4K2A	Phosphatidylinositol 4-kinase type 2-alpha OS=Homo sapiens OX=9606 GN=PI4K2A PE=1 SV=1	25	11	14	11	479	54	8.29	96	105.4	106.1	100.3	95.7	96.6	95.9	103.933	96.0667	-	1.08189	0.0130893
P56378	ATP5MPL	ATP synthase subunit ATP5MPL, mitochondrial OS=Homo sapiens OX=9606 GN=ATP5MPL PE=1 SV=1	28	2	8	2	58	6.7	10.08	66	83.4	100.7	127.7	95.6	93.7	98.9	103.933	96.0667	-	1.08189	0.577165
Q9UHV7	MED13	Mediator of RNA polymerase II transcription subunit 13 OS=Homo sapiens OX=9606 GN=MED13 PE=1 SV=3	1	1	1	1	2174	239.1	5.64	36	95.8	101.9	114.1	89.5	96.3	102.4	103.933	96.0667	-	1.08189	0.295607
O15212	PFDN6	Prefoldin subunit 6 OS=Homo sapiens OX=9606 GN=PFDN6 PE=1 SV=1	33	4	8	4	129	14.6	8.88	75	103.7	101.5	106.6	95.5	97.3	95.4	103.933	96.0667	-	1.08189	0.00796052
Q6ZVM7	TOM1L2	TOM1-like protein 2 OS=Homo sapiens OX=9606 GN=TOM1L2 PE=1 SV=1	7	3	3	3	507	55.5	4.79	72	112.5	110.2	89.2	84.7	104	99.6	103.967	96.1	-	1.08186	0.451394
P04844	RPN2	Dolichyl-diphosphooligosaccharide--protein glycosyltransferase subunit 2 OS=Homo sapiens OX=9606 GN=RPN2 PE=1 SV=3	24	11	38	11	631	69.2	5.69	587	106.2	103.9	101.7	95.8	97.7	94.8	103.933	96.1	-	1.08151	0.0072579
P48651	PTDSS1	Phosphatidylserine synthase 1 OS=Homo sapiens OX=9606 GN=PTDSS1 PE=1 SV=1	4	2	4	2	473	55.5	8.43	44	116	100.6	95	104.6	93.6	90	103.867	96.0667	-	1.08119	0.366223
B7ZAQ6	GPR89A	Golgi pH regulator A OS=Homo sapiens OX=9606 GN=GPR89A PE=1 SV=2	5	2	4	2	455	52.9	9.28	113	113.3	103.2	95.2	91.6	98.3	98.4	103.9	96.1	-	1.08117	0.242984
Q9BSK2	SLC25A33	Solute carrier family 25 member 33 OS=Homo sapiens OX=9606 GN=SLC25A33 PE=1 SV=1	3	1	2	1	321	35.4	9.6	15	103	105.4	103.3	93	98.2	97.1	103.9	96.1	-	1.08117	0.011253
P53634	CTSC	Dipeptidyl peptidase 1 OS=Homo sapiens OX=9606 GN=CTSC PE=1 SV=2	4	1	1	1	463	51.8	6.99	37	106.1	103.8	101.8	96.2	95.1	97	103.9	96.1	-	1.08117	0.00456467
Q9UDW3	ZMAT5	Zinc finger matrin-type protein 5 OS=Homo sapiens OX=9606 GN=ZMAT5 PE=1 SV=1	7	1	1	1	170	20	8.59	28	103.4	103.1	105.1	93.9	96.4	98	103.867	96.1	-	1.08082	0.00447522
Q53H82	LACTB2	Endoribonuclease LACTB2 OS=Homo sapiens OX=9606 GN=LACTB2 PE=1 SV=2	13	3	5	3	288	32.8	6.8	28	103.4	102.9	105.4	95.1	100.4	92.9	103.9	96.1333	-	1.08079	0.0299221
Q99487	PAFAH2	Platelet-activating factor acetylhydrolase 2, cytoplasmic OS=Homo sapiens OX=9606 GN=PAFAH2 PE=1 SV=1	14	5	6	5	392	44	6.89	52	104.8	103.2	103.7	95.1	96.3	97	103.9	96.1333	-	1.08079	0.000439048
Q9UHB7	AFF4	AF4/FMR2 family member 4 OS=Homo sapiens OX=9606 GN=AFF4 PE=1 SV=1	6	6	7	6	1163	127.4	9.31	55	102.2	102.6	106.8	102.4	94.9	91.1	103.867	96.1333	-	1.08044	0.100242
Q9BW19	KIFC1	Kinesin-like protein KIFC1 OS=Homo sapiens OX=9606 GN=KIFC1 PE=1 SV=2	21	11	14	11	673	73.7	8.98	152	99.7	111.7	100.2	97	96.5	94.9	103.867	96.1333	-	1.08044	0.123259
O75607	NPM3	Nucleoplasmin-3 OS=Homo sapiens OX=9606 GN=NPM3 PE=1 SV=3	20	3	6	3	178	19.3	4.63	329	98.7	101.6	111.3	91.7	100.1	96.6	103.867	96.1333	-	1.08044	0.162414
Q14344	GNA13	Guanine nucleotide-binding protein subunit alpha-13 OS=Homo sapiens OX=9606 GN=GNA13 PE=1 SV=2	33	12	50	11	377	44	8	691	102.3	105.8	103.5	93.7	96.9	97.8	103.867	96.1333	-	1.08044	0.00868638
Q8NHG8	ZNRF2	E3 ubiquitin-protein ligase ZNRF2 OS=Homo sapiens OX=9606 GN=ZNRF2 PE=1 SV=1	8	1	1	1	242	24.1	7.09	21	106.2	96.4	108.9	88.4	100.6	99.4	103.833	96.1333	-	1.0801	0.229206
P10155	RO60	60 kDa SS-A/Ro ribonucleoprotein OS=Homo sapiens OX=9606 GN=RO60 PE=1 SV=2	16	8	10	8	538	60.6	8.03	102	102.3	107	102.3	99.3	95.2	94	103.867	96.1667	-	1.08007	0.0264473
Q96CM8	ACSF2	Medium-chain acyl-CoA ligase ACSF2, mitochondrial OS=Homo sapiens OX=9606 GN=ACSF2 PE=1 SV=2	18	10	15	10	615	68.1	7.55	82	109.5	99.5	102.6	100.2	94.4	93.9	103.867	96.1667	-	1.08007	0.0979432
Q9BRR8	GPATCH1	G patch domain-containing protein 1 OS=Homo sapiens OX=9606 GN=GPATCH1 PE=1 SV=1	6	6	11	6	931	103.3	7.05	148	98.1	104.2	109.2	98	95.8	94.7	103.833	96.1667	-	1.07972	0.0841766
O60563	CCNT1	Cyclin-T1 OS=Homo sapiens OX=9606 GN=CCNT1 PE=1 SV=1	10	6	8	6	726	80.6	8.78	54	95.5	109.1	106.9	99.2	95.9	93.4	103.833	96.1667	-	1.07972	0.16634
Q9H6K4	OPA3	Optic atrophy 3 protein OS=Homo sapiens OX=9606 GN=OPA3 PE=1 SV=1	11	2	4	2	179	20	8.91	31	104.8	103.7	103.1	96.1	98.2	94.3	103.867	96.2	-	1.0797	0.00339505
Q92766	RREB1	Ras-responsive element-binding protein 1 OS=Homo sapiens OX=9606 GN=RREB1 PE=1 SV=3	0	1	1	1	1687	181.3	6.98	0	108.8	108.1	94.5	95.4	98.8	94.3	103.8	96.1667	-	1.07938	0.190442
Q8TEM1	NUP210	Nuclear pore membrane glycoprotein 210 OS=Homo sapiens OX=9606 GN=NUP210 PE=1 SV=3	13	25	62	25	1887	205	6.81	711	104.8	103.7	102.9	95.2	96.2	97.1	103.8	96.1667	-	1.07938	0.000603329
P13995	MTHFD2	Bifunctional methylenetetrahydrofolate dehydrogenase/cyclohydrolase, mitochondrial OS=Homo sapiens OX=9606 GN=MTHFD2 PE=1 SV=2	34	12	46	12	350	37.9	8.73	504	101.3	105.3	104.8	96.3	95.3	96.9	103.8	96.1667	-	1.07938	0.00471833
P78417	GSTO1	Glutathione S-transferase omega-1 OS=Homo sapiens OX=9606 GN=GSTO1 PE=1 SV=2	22	5	8	5	241	27.5	6.6	73	110.1	100	101.4	97.5	97.1	94	103.833	96.2	-	1.07935	0.0847452
Q15678	PTPN14	Tyrosine-protein phosphatase non-receptor type 14 OS=Homo sapiens OX=9606 GN=PTPN14 PE=1 SV=2	1	1	1	1	1187	135.2	8.31	30	108	99	104.5	98.4	94.1	96.1	103.833	96.2	-	1.07935	0.0580004
Q9Y2R0	COA3	Cytochrome c oxidase assembly factor 3 homolog, mitochondrial OS=Homo sapiens OX=9606 GN=COA3 PE=1 SV=1	47	5	13	5	106	11.7	9.6	141	106.4	105.2	99.8	98	95.9	94.7	103.8	96.2	-	1.079	0.0277353
Q9NTG7	SIRT3	NAD-dependent protein deacetylase sirtuin-3, mitochondrial OS=Homo sapiens OX=9606 GN=SIRT3 PE=1 SV=2	13	5	9	5	399	43.5	8.7	196	106.3	101.5	103.6	98.8	95.4	94.4	103.8	96.2	-	1.079	0.0168283
Q5TA45	INTS11	Integrator complex subunit 11 OS=Homo sapiens OX=9606 GN=INTS11 PE=1 SV=2	4	2	2	2	600	67.6	8.06	32	105.3	98.7	107.4	91.4	97.6	99.6	103.8	96.2	-	1.079	0.102393
P55011	SLC12A2	Solute carrier family 12 member 2 OS=Homo sapiens OX=9606 GN=SLC12A2 PE=1 SV=1	14	15	23	15	1212	131.4	6.4	168	106.5	106.9	98	98.6	95.4	94.6	103.8	96.2	-	1.079	0.0732839
Q56NI9	ESCO2	N-acetyltransferase ESCO2 OS=Homo sapiens OX=9606 GN=ESCO2 PE=1 SV=1	1	1	1	1	601	68.3	9.39	0	100.7	109.1	101.5	102.2	90.7	95.7	103.767	96.2	-	1.07866	0.151205
O14662	STX16	Syntaxin-16 OS=Homo sapiens OX=9606 GN=STX16 PE=1 SV=3	12	3	3	3	325	37	6.11	70	107.1	98.8	105.4	94.6	95.7	98.3	103.767	96.2	-	1.07866	0.0517607
Q9H082	RAB33B	Ras-related protein Rab-33B OS=Homo sapiens OX=9606 GN=RAB33B PE=1 SV=1	21	4	26	3	229	25.7	7.18	286	99.5	103.2	108.6	98.3	93.7	96.6	103.767	96.2	-	1.07866	0.0631057
P61916	NPC2	NPC intracellular cholesterol transporter 2 OS=Homo sapiens OX=9606 GN=NPC2 PE=1 SV=1	34	6	16	6	151	16.6	7.65	164	114.8	95.4	101.1	106.7	89.7	92.2	103.767	96.2	-	1.07866	0.388288
O00161	SNAP23	Synaptosomal-associated protein 23 OS=Homo sapiens OX=9606 GN=SNAP23 PE=1 SV=1	51	9	27	9	211	23.3	5.01	461	105	104.9	101.4	99.3	94.3	95.1	103.767	96.2333	-	1.07828	0.018121
P61313	RPL15	60S ribosomal protein L15 OS=Homo sapiens OX=9606 GN=RPL15 PE=1 SV=2	36	7	25	7	204	24.1	11.62	317	98.4	107.2	105.7	93.4	97.9	97.4	103.767	96.2333	-	1.07828	0.0700618
Q96RR1	TWNK	Twinkle protein, mitochondrial OS=Homo sapiens OX=9606 GN=TWNK PE=1 SV=1	4	2	2	2	684	77.1	8.98	25	92.6	103.3	115.3	90.2	96.1	102.4	103.733	96.2333	-	1.07794	0.370615
O14524	NEMP1	Nuclear envelope integral membrane protein 1 OS=Homo sapiens OX=9606 GN=NEMP1 PE=1 SV=2	13	6	13	6	444	50.6	6.93	154	98.2	103.5	109.5	97.4	95.9	95.4	103.733	96.2333	-	1.07794	0.0867056
Q8IWS0	PHF6	PHD finger protein 6 OS=Homo sapiens OX=9606 GN=PHF6 PE=1 SV=1	18	7	11	7	365	41.3	8.68	70	105.5	106.2	99.6	96.3	95.6	96.9	103.767	96.2667	-	1.07791	0.0242997
P07305	H1-0	Histone H1.0 OS=Homo sapiens OX=9606 GN=H1-0 PE=1 SV=3	28	6	32	6	194	20.9	10.84	587	101.5	103.3	106.4	99.9	96	92.9	103.733	96.2667	-	1.07756	0.0395067
P06280	GLA	Alpha-galactosidase A OS=Homo sapiens OX=9606 GN=GLA PE=1 SV=1	12	4	5	4	429	48.7	5.6	95	107	99.3	104.9	107	91.6	90.2	103.733	96.2667	-	1.07756	0.271037
Q15369	ELOC	Elongin-C OS=Homo sapiens OX=9606 GN=ELOC PE=1 SV=1	38	3	4	3	112	12.5	4.78	108	107.7	107.4	96.1	87.4	101.4	100	103.733	96.2667	-	1.07756	0.271908
Q99720	SIGMAR1	Sigma non-opioid intracellular receptor 1 OS=Homo sapiens OX=9606 GN=SIGMAR1 PE=1 SV=1	9	2	5	2	223	25.1	5.96	50	98	117.7	95.5	90.3	99.3	99.2	103.733	96.2667	-	1.07756	0.383087
P62244	RPS15A	40S ribosomal protein S15a OS=Homo sapiens OX=9606 GN=RPS15A PE=1 SV=2	42	6	27	6	130	14.8	10.13	167	102.4	102	106.8	94.4	96.6	97.8	103.733	96.2667	-	1.07756	0.0151469
Q14498	RBM39	RNA-binding protein 39 OS=Homo sapiens OX=9606 GN=RBM39 PE=1 SV=2	23	11	40	11	530	59.3	10.1	906	98.7	105.4	107.1	97.8	95.1	96	103.733	96.3	-	1.07719	0.0503627
Q9H4A6	GOLPH3	Golgi phosphoprotein 3 OS=Homo sapiens OX=9606 GN=GOLPH3 PE=1 SV=1	14	4	7	4	298	33.8	6.44	130	102.5	104.6	104.1	93.8	98	97.1	103.733	96.3	-	1.07719	0.00644619
O95295	SNAPIN	SNARE-associated protein Snapin OS=Homo sapiens OX=9606 GN=SNAPIN PE=1 SV=1	26	3	4	3	136	14.9	9.31	70	108.8	104.3	98.1	95.8	96.1	97	103.733	96.3	-	1.07719	0.0759532
Q9GZY4	COA1	Cytochrome c oxidase assembly factor 1 homolog OS=Homo sapiens OX=9606 GN=COA1 PE=1 SV=1	10	2	5	2	146	16.7	8.81	26	99.4	105.2	106.5	94.9	96.4	97.6	103.7	96.3	-	1.07684	0.0331419
Q8IWA4	MFN1	Mitofusin-1 OS=Homo sapiens OX=9606 GN=MFN1 PE=1 SV=3	20	15	23	15	741	84.1	6.33	185	105.1	107.1	98.9	96.6	96	96.3	103.7	96.3	-	1.07684	0.0403199
Q99570	PIK3R4	Phosphoinositide 3-kinase regulatory subunit 4 OS=Homo sapiens OX=9606 GN=PIK3R4 PE=1 SV=3	2	3	3	3	1358	153	7.17	28	103.1	103.7	104.3	90	100.4	98.5	103.7	96.3	-	1.07684	0.0828552
Q9NRX5	SERINC1	Serine incorporator 1 OS=Homo sapiens OX=9606 GN=SERINC1 PE=1 SV=1	12	5	16	5	453	50.5	5.85	378	105.6	103	102.5	97.5	96.8	94.6	103.7	96.3	-	1.07684	0.00468792
Q96T37	RBM15	RNA-binding protein 15 OS=Homo sapiens OX=9606 GN=RBM15 PE=1 SV=2	17	14	18	13	977	107.1	10.08	214	107.8	104.8	98.5	98.4	91.9	98.6	103.7	96.3	-	1.07684	0.103021
Q8N8Z6	DCBLD1	Discoidin, CUB and LCCL domain-containing protein 1 OS=Homo sapiens OX=9606 GN=DCBLD1 PE=1 SV=2	3	2	2	2	715	77.9	8.05	17	110.7	97.4	103	100.5	94.8	93.6	103.7	96.3	-	1.07684	0.168181
O43766	LIAS	Lipoyl synthase, mitochondrial OS=Homo sapiens OX=9606 GN=LIAS PE=1 SV=3	2	1	1	1	372	41.9	8.59	13	98.9	101.5	110.7	93.1	98.5	97.3	103.7	96.3	-	1.07684	0.13328
Q8N4L2	PIP4P2	Type 2 phosphatidylinositol 4,5-bisphosphate 4-phosphatase OS=Homo sapiens OX=9606 GN=PIP4P2 PE=1 SV=1	8	2	2	1	257	28.1	8.68	37	99.3	109.5	102.3	95.4	97.5	96	103.7	96.3	-	1.07684	0.0747946
Q9Y4C8	RBM19	Probable RNA-binding protein 19 OS=Homo sapiens OX=9606 GN=RBM19 PE=1 SV=3	8	7	11	7	960	107.3	6.54	166	101.1	108.6	101.4	95.4	94.4	99.1	103.7	96.3	-	1.07684	0.059569
Q9UBS4	DNAJB11	DnaJ homolog subfamily B member 11 OS=Homo sapiens OX=9606 GN=DNAJB11 PE=1 SV=1	36	13	45	13	358	40.5	6.18	789	102.1	97.6	111.4	99.9	93.7	95.3	103.7	96.3	-	1.07684	0.173021
Q9NUQ2	AGPAT5	1-acyl-sn-glycerol-3-phosphate acyltransferase epsilon OS=Homo sapiens OX=9606 GN=AGPAT5 PE=1 SV=3	22	8	18	8	364	42	9.1	193	105.4	104.5	101.2	96.4	97.2	95.3	103.7	96.3	-	1.07684	0.0059973
Q9BVV7	TIMM21	Mitochondrial import inner membrane translocase subunit Tim21 OS=Homo sapiens OX=9606 GN=TIMM21 PE=1 SV=1	32	8	24	8	248	28.2	9.7	357	107.4	104.1	99.6	98.2	94.1	96.7	103.7	96.3333	-	1.07647	0.0450305
Q6PD62	CTR9	RNA polymerase-associated protein CTR9 homolog OS=Homo sapiens OX=9606 GN=CTR9 PE=1 SV=1	11	13	19	13	1173	133.4	6.77	105	96.9	96.8	117.4	98.8	97.2	93	103.7	96.3333	-	1.07647	0.355959
O95167	NDUFA3	NADH dehydrogenase [ubiquinone] 1 alpha subcomplex subunit 3 OS=Homo sapiens OX=9606 GN=NDUFA3 PE=1 SV=1	13	1	2	1	84	9.3	8.46	31	109	103.4	98.7	96.5	95.9	96.6	103.7	96.3333	-	1.07647	0.0691119
Q9BVS4	RIOK2	Serine/threonine-protein kinase RIO2 OS=Homo sapiens OX=9606 GN=RIOK2 PE=1 SV=2	3	1	1	1	552	63.2	5.94	48	98.8	107	105.2	99.8	97.1	92.1	103.667	96.3333	-	1.07612	0.0943667
P21912	SDHB	Succinate dehydrogenase [ubiquinone] iron-sulfur subunit, mitochondrial OS=Homo sapiens OX=9606 GN=SDHB PE=1 SV=3	28	10	26	10	280	31.6	8.76	191	108	104.7	98.3	95.1	97.7	96.2	103.667	96.3333	-	1.07612	0.0675037
Q9UG56	PISD	Phosphatidylserine decarboxylase proenzyme, mitochondrial OS=Homo sapiens OX=9606 GN=PISD PE=2 SV=4	12	5	7	5	409	46.6	9.42	44	101.7	102.1	107.2	99.3	98.7	91	103.667	96.3333	-	1.07612	0.08407
P00846	MT-ATP6	ATP synthase subunit a OS=Homo sapiens OX=9606 GN=MT-ATP6 PE=1 SV=1	4	1	3	1	226	24.8	10.1	62	105.9	106.8	98.3	97.6	95	96.4	103.667	96.3333	-	1.07612	0.0587779
Q53EZ4	CEP55	Centrosomal protein of 55 kDa OS=Homo sapiens OX=9606 GN=CEP55 PE=1 SV=3	7	3	4	3	464	54.1	7.01	19	93.1	98.6	119.3	96.5	96.9	95.6	103.667	96.3333	-	1.07612	0.410412
P15927	RPA2	Replication protein A 32 kDa subunit OS=Homo sapiens OX=9606 GN=RPA2 PE=1 SV=1	19	4	5	4	270	29.2	6.15	125	101	107.4	102.6	95.2	96.4	97.4	103.667	96.3333	-	1.07612	0.0223434
Q5W111	SPRYD7	SPRY domain-containing protein 7 OS=Homo sapiens OX=9606 GN=SPRYD7 PE=1 SV=2	14	3	5	3	196	21.7	6.7	28	101.2	104.5	105.2	97.2	93.6	98.2	103.633	96.3333	-	1.07578	0.0172828
Q9Y333	LSM2	U6 snRNA-associated Sm-like protein LSm2 OS=Homo sapiens OX=9606 GN=LSM2 PE=1 SV=1	47	4	5	4	95	10.8	6.52	137	110.6	100	100.4	102.7	90.1	96.3	103.667	96.3667	-	1.07575	0.220037
O94913	PCF11	Pre-mRNA cleavage complex 2 protein Pcf11 OS=Homo sapiens OX=9606 GN=PCF11 PE=1 SV=3	3	4	4	4	1555	172.9	8.48	47	97.4	105.6	108	98.6	94.1	96.4	103.667	96.3667	-	1.07575	0.102653
Q9H1X3	DNAJC25	DnaJ homolog subfamily C member 25 OS=Homo sapiens OX=9606 GN=DNAJC25 PE=1 SV=1	6	2	4	2	360	42.4	9.13	31	101.9	105.6	103.4	99.3	95	94.8	103.633	96.3667	-	1.07541	0.0162001
Q9P253	VPS18	Vacuolar protein sorting-associated protein 18 homolog OS=Homo sapiens OX=9606 GN=VPS18 PE=1 SV=2	5	5	7	5	973	110.1	6.07	102	115.4	95.1	100.4	90.5	93.3	105.3	103.633	96.3667	-	1.07541	0.392399
Q9NYM9	BET1L	BET1-like protein OS=Homo sapiens OX=9606 GN=BET1L PE=1 SV=1	25	2	5	2	111	12.4	8.16	90	102.7	107	101.2	96.4	95.9	96.8	103.633	96.3667	-	1.07541	0.0144397
Q9NWU5	MRPL22	39S ribosomal protein L22, mitochondrial OS=Homo sapiens OX=9606 GN=MRPL22 PE=1 SV=1	44	9	14	9	206	23.6	9.94	155	95.6	121.4	93.9	96.4	98.4	94.3	103.633	96.3667	-	1.07541	0.463563
Q15771	RAB30	Ras-related protein Rab-30 OS=Homo sapiens OX=9606 GN=RAB30 PE=1 SV=2	22	4	24	3	203	23	4.97	248	104.6	106.5	99.8	97.2	95.1	96.8	103.633	96.3667	-	1.07541	0.0256156
O43688	PLPP2	Phospholipid phosphatase 2 OS=Homo sapiens OX=9606 GN=PLPP2 PE=1 SV=1	16	4	8	4	288	32.6	8.35	58	100	107	103.8	96.5	94.9	97.7	103.6	96.3667	-	1.07506	0.0294199
Q969M3	YIPF5	Protein YIPF5 OS=Homo sapiens OX=9606 GN=YIPF5 PE=1 SV=1	8	2	7	2	257	28	4.36	91	104.9	106	100	100.4	94.8	94	103.633	96.4	-	1.07503	0.0570236
Q5THK1	PRR14L	Protein PRR14L OS=Homo sapiens OX=9606 GN=PRR14L PE=1 SV=1	1	1	1	1	2151	237.2	6.33	16	110.8	97.3	102.7	95.9	101.8	91.5	103.6	96.4	-	1.07469	0.217865
Q9BRD0	BUD13	BUD13 homolog OS=Homo sapiens OX=9606 GN=BUD13 PE=1 SV=1	9	5	6	5	619	70.5	9.86	96	103.8	104.5	102.5	94.2	95	100	103.6	96.4	-	1.07469	0.0195106
P98155	VLDLR	Very low-density lipoprotein receptor OS=Homo sapiens OX=9606 GN=VLDLR PE=1 SV=1	1	1	1	1	873	96	4.79	20	95.3	106	109.5	96.7	94.5	98	103.6	96.4	-	1.07469	0.176458
P15291	B4GALT1	Beta-1,4-galactosyltransferase 1 OS=Homo sapiens OX=9606 GN=B4GALT1 PE=1 SV=5	12	2	2	2	398	43.9	8.65	119	107.3	104.5	99	102.3	92.5	94.4	103.6	96.4	-	1.07469	0.136031
Q92841	DDX17	Probable ATP-dependent RNA helicase DDX17 OS=Homo sapiens OX=9606 GN=DDX17 PE=1 SV=2	37	27	133	20	729	80.2	8.27	1817	100.7	106.4	103.7	95.4	95.4	98.4	103.6	96.4	-	1.07469	0.0201551
Q15057	ACAP2	Arf-GAP with coiled-coil, ANK repeat and PH domain-containing protein 2 OS=Homo sapiens OX=9606 GN=ACAP2 PE=1 SV=3	3	2	2	2	778	88	6.8	46	99.2	106.4	105.2	92.1	99.2	97.9	103.6	96.4	-	1.07469	0.082122
Q96DA2	RAB39B	Ras-related protein Rab-39B OS=Homo sapiens OX=9606 GN=RAB39B PE=1 SV=1	27	6	27	5	213	24.6	7.83	199	104.9	104.8	101.1	95.7	97.2	96.3	103.6	96.4	-	1.07469	0.00555217
Q9Y3U8	RPL36	60S ribosomal protein L36 OS=Homo sapiens OX=9606 GN=RPL36 PE=1 SV=3	37	6	34	6	105	12.2	11.59	245	99.2	106.3	105.3	94.5	97.6	97.2	103.6	96.4333	-	1.07432	0.0416486
Q96HR8	NAF1	H/ACA ribonucleoprotein complex non-core subunit NAF1 OS=Homo sapiens OX=9606 GN=NAF1 PE=1 SV=2	2	1	1	1	494	53.7	4.87	16	106.3	102.6	101.9	90.7	92.7	105.9	103.6	96.4333	-	1.07432	0.221996
Q96BZ9	TBC1D20	TBC1 domain family member 20 OS=Homo sapiens OX=9606 GN=TBC1D20 PE=1 SV=1	13	4	6	4	403	45.8	6.86	79	106.2	98.1	106.4	98	92.3	99	103.567	96.4333	-	1.07397	0.106739
Q9ULR0	ISY1	Pre-mRNA-splicing factor ISY1 homolog OS=Homo sapiens OX=9606 GN=ISY1 PE=1 SV=3	24	8	16	8	285	33	5.17	53	100.4	106	104.3	95.6	97.8	95.9	103.567	96.4333	-	1.07397	0.0164852
P43307	SSR1	Translocon-associated protein subunit alpha OS=Homo sapiens OX=9606 GN=SSR1 PE=1 SV=3	12	3	20	3	286	32.2	4.49	433	104.7	105.9	100.1	98.5	95.5	95.3	103.567	96.4333	-	1.07397	0.0252932
Q9UHQ9	CYB5R1	NADH-cytochrome b5 reductase 1 OS=Homo sapiens OX=9606 GN=CYB5R1 PE=1 SV=1	28	8	26	8	305	34.1	9.38	340	104.9	104.4	101.4	96.2	96.4	96.7	103.567	96.4333	-	1.07397	0.00294001
Q7Z5G4	GOLGA7	Golgin subfamily A member 7 OS=Homo sapiens OX=9606 GN=GOLGA7 PE=1 SV=2	23	3	7	3	137	15.8	7.05	125	99.5	103.4	107.8	95.3	94.3	99.7	103.567	96.4333	-	1.07397	0.0706829
Q9Y2R4	DDX52	Probable ATP-dependent RNA helicase DDX52 OS=Homo sapiens OX=9606 GN=DDX52 PE=1 SV=3	13	7	11	6	599	67.5	9.67	46	105.5	109.1	96	97.2	96.3	95.8	103.533	96.4333	-	1.07363	0.145025
Q13033	STRN3	Striatin-3 OS=Homo sapiens OX=9606 GN=STRN3 PE=1 SV=3	4	3	3	2	797	87.2	5.36	48	107.4	98.2	105	98.4	98	92.9	103.533	96.4333	-	1.07363	0.0960306
O14773	TPP1	Tripeptidyl-peptidase 1 OS=Homo sapiens OX=9606 GN=TPP1 PE=1 SV=2	11	5	12	5	563	61.2	6.48	232	108.1	100.7	101.8	101.2	93.8	94.3	103.533	96.4333	-	1.07363	0.0991748
Q15388	TOMM20	Mitochondrial import receptor subunit TOM20 homolog OS=Homo sapiens OX=9606 GN=TOMM20 PE=1 SV=1	19	3	12	3	145	16.3	8.6	292	106.8	103.4	100.4	92.2	97	100.1	103.533	96.4333	-	1.07363	0.0737719
P61244	MAX	Protein max OS=Homo sapiens OX=9606 GN=MAX PE=1 SV=1	12	2	4	2	160	18.3	6.3	45	105.2	101.5	103.9	96.6	93.7	99	103.533	96.4333	-	1.07363	0.0193836
Q9UI43	MRM2	rRNA methyltransferase 2, mitochondrial OS=Homo sapiens OX=9606 GN=MRM2 PE=1 SV=1	7	1	1	1	246	27.4	9.5	28	92.7	111.7	106.3	96.8	97.3	95.3	103.567	96.4667	-	1.0736	0.279757
Q8N9N7	LRRC57	Leucine-rich repeat-containing protein 57 OS=Homo sapiens OX=9606 GN=LRRC57 PE=1 SV=1	18	5	5	5	239	26.7	8.43	47	106.3	101.3	103.1	94.9	98	96.5	103.567	96.4667	-	1.0736	0.014358
O43520	ATP8B1	Phospholipid-transporting ATPase IC OS=Homo sapiens OX=9606 GN=ATP8B1 PE=1 SV=3	2	2	2	2	1251	143.6	7.15	22	101.9	106.2	102.5	85.8	105.6	98	103.533	96.4667	-	1.07326	0.298666
Q9Y2L1	DIS3	Exosome complex exonuclease RRP44 OS=Homo sapiens OX=9606 GN=DIS3 PE=1 SV=2	4	3	4	3	958	108.9	7.14	79	99.2	101.7	109.7	93.4	96.3	99.7	103.533	96.4667	-	1.07326	0.125146
Q92890	UFD1	Ubiquitin recognition factor in ER-associated degradation protein 1 OS=Homo sapiens OX=9606 GN=UFD1 PE=1 SV=3	29	7	12	7	307	34.5	6.7	115	105.6	100.9	104.1	97.7	96.3	95.4	103.533	96.4667	-	1.07326	0.0100964
P22830	FECH	Ferrochelatase, mitochondrial OS=Homo sapiens OX=9606 GN=FECH PE=1 SV=2	25	9	14	9	423	47.8	8.73	110	106.4	103.7	100.5	99.4	96	94	103.533	96.4667	-	1.07326	0.038282
Q6UXV4	APOOL	MICOS complex subunit MIC27 OS=Homo sapiens OX=9606 GN=APOOL PE=1 SV=1	26	5	8	5	268	29.1	9.52	129	102.4	104.8	103.4	99	95	95.4	103.533	96.4667	-	1.07326	0.00819668
P51114	FXR1	Fragile X mental retardation syndrome-related protein 1 OS=Homo sapiens OX=9606 GN=FXR1 PE=1 SV=3	33	18	49	16	621	69.7	6.15	498	99.6	105.3	105.7	95.1	96.9	97.4	103.533	96.4667	-	1.07326	0.027763
Q92504	SLC39A7	Zinc transporter SLC39A7 OS=Homo sapiens OX=9606 GN=SLC39A7 PE=1 SV=2	4	3	5	3	469	50.1	6.87	21	101.2	110	99.3	93	94.8	101.6	103.5	96.4667	-	1.07291	0.170088
P42696	RBM34	RNA-binding protein 34 OS=Homo sapiens OX=9606 GN=RBM34 PE=1 SV=2	33	15	33	15	430	48.5	10.11	354	102.8	104.3	103.4	97.6	95.7	96.1	103.5	96.4667	-	1.07291	0.000629241
Q6PML9	SLC30A9	Zinc transporter 9 OS=Homo sapiens OX=9606 GN=SLC30A9 PE=1 SV=1	10	5	6	5	568	63.5	8.32	119	106.1	105.1	99.3	99.1	94.2	96.1	103.5	96.4667	-	1.07291	0.0512256
Q9BTD8	RBM42	RNA-binding protein 42 OS=Homo sapiens OX=9606 GN=RBM42 PE=1 SV=1	17	5	13	5	480	50.4	9.63	354	103	100.3	107.2	94.7	95.7	99	103.5	96.4667	-	1.07291	0.0423319
Q9H490	PIGU	Phosphatidylinositol glycan anchor biosynthesis class U protein OS=Homo sapiens OX=9606 GN=PIGU PE=1 SV=3	5	2	6	2	435	50	7.72	111	102.9	108.8	98.8	99.2	92.7	97.5	103.5	96.4667	-	1.07291	0.114443
Q8WVI0	SMIM4	Small integral membrane protein 4 OS=Homo sapiens OX=9606 GN=SMIM4 PE=1 SV=2	16	1	3	1	70	8.7	10.87	54	100.4	104.1	106.1	93	96.7	99.8	103.533	96.5	-	1.07288	0.0525956
O95169	NDUFB8	NADH dehydrogenase [ubiquinone] 1 beta subcomplex subunit 8, mitochondrial OS=Homo sapiens OX=9606 GN=NDUFB8 PE=1 SV=1	27	4	10	4	186	21.8	6.8	161	104.4	106.5	99.7	99.6	93.4	96.5	103.533	96.5	-	1.07288	0.0592258
Q9BY50	SEC11C	Signal peptidase complex catalytic subunit SEC11C OS=Homo sapiens OX=9606 GN=SEC11C PE=1 SV=3	9	2	3	2	192	21.5	9.2	19	102.7	104.7	103.2	94.7	99.5	95.3	103.533	96.5	-	1.07288	0.0123711
Q9BXS6	NUSAP1	Nucleolar and spindle-associated protein 1 OS=Homo sapiens OX=9606 GN=NUSAP1 PE=1 SV=1	11	5	10	5	441	49.4	9.91	81	100.3	107.6	102.7	100.1	93.5	95.9	103.533	96.5	-	1.07288	0.0714966
P04066	FUCA1	Tissue alpha-L-fucosidase OS=Homo sapiens OX=9606 GN=FUCA1 PE=1 SV=4	6	3	4	3	466	53.7	6.84	31	113.4	95	102.1	101.3	93.3	94.9	103.5	96.5	-	1.07254	0.300298
Q6ZYL4	GTF2H5	General transcription factor IIH subunit 5 OS=Homo sapiens OX=9606 GN=GTF2H5 PE=1 SV=1	37	2	2	2	71	8	4.65	40	103.5	103.9	103.1	92.7	98.1	98.7	103.5	96.5	-	1.07254	0.0219179
Q8TAD4	SLC30A5	Zinc transporter 5 OS=Homo sapiens OX=9606 GN=SLC30A5 PE=1 SV=1	8	5	8	5	765	84	7.31	170	106.4	102.3	101.8	101	91.9	96.6	103.5	96.5	-	1.07254	0.0802623
Q01974	ROR2	Tyrosine-protein kinase transmembrane receptor ROR2 OS=Homo sapiens OX=9606 GN=ROR2 PE=1 SV=2	4	2	2	2	943	104.7	6.55	29	103.4	106	101.1	95.6	94	99.9	103.5	96.5	-	1.07254	0.0363045
P55327	TPD52	Tumor protein D52 OS=Homo sapiens OX=9606 GN=TPD52 PE=1 SV=2	12	2	5	2	224	24.3	4.83	107	104.7	104.5	101.3	94.6	95.4	99.5	103.5	96.5	-	1.07254	0.0202478
P51665	PSMD7	26S proteasome non-ATPase regulatory subunit 7 OS=Homo sapiens OX=9606 GN=PSMD7 PE=1 SV=2	10	3	4	3	324	37	6.77	43	100.3	99.2	111	93	99.1	97.4	103.5	96.5	-	1.07254	0.169262
P55010	EIF5	Eukaryotic translation initiation factor 5 OS=Homo sapiens OX=9606 GN=EIF5 PE=1 SV=2	23	8	15	8	431	49.2	5.58	104	104.2	100.1	106.2	94	97.4	98.1	103.5	96.5	-	1.07254	0.0333367
Q9P1Y6	PHRF1	PHD and RING finger domain-containing protein 1 OS=Homo sapiens OX=9606 GN=PHRF1 PE=1 SV=3	7	9	12	8	1649	178.6	8.95	80	98.6	100.2	111.7	97.1	94.7	97.7	103.5	96.5	-	1.07254	0.17302
O94874	UFL1	E3 UFM1-protein ligase 1 OS=Homo sapiens OX=9606 GN=UFL1 PE=1 SV=2	35	27	60	27	794	89.5	6.79	786	102.3	104.4	103.7	96.8	96.1	96.6	103.467	96.5	-	1.07219	0.000433299
P11169	SLC2A3	Solute carrier family 2, facilitated glucose transporter member 3 OS=Homo sapiens OX=9606 GN=SLC2A3 PE=1 SV=1	7	4	7	4	496	53.9	7.2	39	106.6	103.4	100.5	102.9	94.9	91.8	103.5	96.5333	-	1.07217	0.136493
O94854	KIAA0754	Uncharacterized protein KIAA0754 OS=Homo sapiens OX=9606 GN=KIAA0754 PE=2 SV=4	7	7	7	7	1291	135.1	4.21	89	102.2	95	113.2	93.1	100.5	96	103.467	96.5333	-	1.07182	0.291659
P49821	NDUFV1	NADH dehydrogenase [ubiquinone] flavoprotein 1, mitochondrial OS=Homo sapiens OX=9606 GN=NDUFV1 PE=1 SV=4	28	13	40	13	464	50.8	8.21	371	104.6	106.6	99.2	96.3	96.3	97	103.467	96.5333	-	1.07182	0.0355333
Q9UKX7	NUP50	Nuclear pore complex protein Nup50 OS=Homo sapiens OX=9606 GN=NUP50 PE=1 SV=2	18	8	10	8	468	50.1	7.06	140	99.3	102.4	108.7	99.5	95.6	94.5	103.467	96.5333	-	1.07182	0.0928453
O43464	HTRA2	Serine protease HTRA2, mitochondrial OS=Homo sapiens OX=9606 GN=HTRA2 PE=1 SV=2	14	6	12	6	458	48.8	10.07	172	105.7	102.3	102.4	94.1	97	98.5	103.467	96.5333	-	1.07182	0.0153422
Q9NUM4	TMEM106B	Transmembrane protein 106B OS=Homo sapiens OX=9606 GN=TMEM106B PE=1 SV=2	19	4	11	4	274	31.1	6.99	312	103	104.4	103	96.6	96.6	96.4	103.467	96.5333	-	1.07182	0.000124363
Q9UBV2	SEL1L	Protein sel-1 homolog 1 OS=Homo sapiens OX=9606 GN=SEL1L PE=1 SV=3	14	11	23	11	794	88.7	5.39	310	106.6	103.5	100.3	97.1	97.2	95.3	103.467	96.5333	-	1.07182	0.0225588
P09104	ENO2	Gamma-enolase OS=Homo sapiens OX=9606 GN=ENO2 PE=1 SV=3	10	3	4	2	434	47.2	5.03	107	100.4	101	108.9	101.5	94.1	94	103.433	96.5333	-	1.07148	0.135409
Q9H8Y5	ANKZF1	Ankyrin repeat and zinc finger domain-containing protein 1 OS=Homo sapiens OX=9606 GN=ANKZF1 PE=1 SV=1	2	1	1	1	726	80.9	8.41	24	102.9	100.4	107	94.3	98.4	96.9	103.433	96.5333	-	1.07148	0.0382231
P35367	HRH1	Histamine H1 receptor OS=Homo sapiens OX=9606 GN=HRH1 PE=1 SV=1	3	2	2	2	487	55.7	9.22	25	105.3	98.9	106.1	96.5	92.9	100.2	103.433	96.5333	-	1.07148	0.0902867
Q09328	MGAT5	Alpha-1,6-mannosylglycoprotein 6-beta-N-acetylglucosaminyltransferase A OS=Homo sapiens OX=9606 GN=MGAT5 PE=1 SV=1	2	2	2	2	741	84.5	8.12	0	103.6	100.8	105.9	101.5	93.3	94.8	103.433	96.5333	-	1.07148	0.0774372
Q8TED9	AFAP1L1	Actin filament-associated protein 1-like 1 OS=Homo sapiens OX=9606 GN=AFAP1L1 PE=1 SV=2	2	1	1	1	768	86.4	6.8	22	100.3	104	106.1	94.8	99.8	95.1	103.467	96.5667	-	1.07145	0.0422476
Q13310	PABPC4	Polyadenylate-binding protein 4 OS=Homo sapiens OX=9606 GN=PABPC4 PE=1 SV=1	29	20	63	13	644	70.7	9.26	822	100.7	106.6	103.1	94.2	98	97.5	103.467	96.5667	-	1.07145	0.0297605
Q9UHB6	LIMA1	LIM domain and actin-binding protein 1 OS=Homo sapiens OX=9606 GN=LIMA1 PE=1 SV=1	49	34	112	34	759	85.2	6.84	1875	97.1	101.8	111.5	96.5	96.8	96.4	103.467	96.5667	-	1.07145	0.179098
P35244	RPA3	Replication protein A 14 kDa subunit OS=Homo sapiens OX=9606 GN=RPA3 PE=1 SV=1	28	3	8	3	121	13.6	5.08	152	103.2	101.9	105.2	92.1	97.6	100	103.433	96.5667	-	1.07111	0.0531707
Q6UX04	CWC27	Spliceosome-associated protein CWC27 homolog OS=Homo sapiens OX=9606 GN=CWC27 PE=1 SV=1	2	1	1	1	472	53.8	5.8	15	103.5	101.3	105.5	96.8	96.4	96.5	103.433	96.5667	-	1.07111	0.00488448
Q969S3	ZNF622	Zinc finger protein 622 OS=Homo sapiens OX=9606 GN=ZNF622 PE=1 SV=1	6	3	3	3	477	54.2	6.15	38	104.1	96.5	109.7	90.8	99.6	99.3	103.433	96.5667	-	1.07111	0.225066
P78382	SLC35A1	CMP-sialic acid transporter OS=Homo sapiens OX=9606 GN=SLC35A1 PE=1 SV=1	7	2	3	2	337	36.8	8.95	40	106	104.7	99.6	95.2	96.1	98.4	103.433	96.5667	-	1.07111	0.0341875
Q96JP5	ZFP91	E3 ubiquitin-protein ligase ZFP91 OS=Homo sapiens OX=9606 GN=ZFP91 PE=1 SV=1	2	1	1	1	570	63.4	7.36	44	101.4	104.2	104.7	97.9	96.9	94.9	103.433	96.5667	-	1.07111	0.00711593
Q86XS8	RNF130	E3 ubiquitin-protein ligase RNF130 OS=Homo sapiens OX=9606 GN=RNF130 PE=1 SV=1	5	1	1	1	419	46.4	8.87	0	111.1	100.3	98.9	105.6	89.8	94.3	103.433	96.5667	-	1.07111	0.321757
Q15006	EMC2	ER membrane protein complex subunit 2 OS=Homo sapiens OX=9606 GN=EMC2 PE=1 SV=1	36	10	19	10	297	34.8	6.57	326	101.5	102.7	106	96.7	97	96	103.4	96.5667	-	1.07076	0.00770434
Q5JRA6	MIA3	Transport and Golgi organization protein 1 homolog OS=Homo sapiens OX=9606 GN=MIA3 PE=1 SV=1	19	36	64	36	1907	213.6	4.84	470	106.2	105.8	98.2	98.7	95.9	95.1	103.4	96.5667	-	1.07076	0.0726581
Q8IUX1	TMEM126B	Complex I assembly factor TMEM126B, mitochondrial OS=Homo sapiens OX=9606 GN=TMEM126B PE=1 SV=2	10	2	3	2	230	25.9	8.81	16	102.4	101.1	106.8	95	94.9	99.9	103.433	96.6	-	1.07074	0.0458033
P22415	USF1	Upstream stimulatory factor 1 OS=Homo sapiens OX=9606 GN=USF1 PE=1 SV=1	9	3	7	3	310	33.5	5.54	20	99.6	105.3	105.4	95.5	95	99.3	103.433	96.6	-	1.07074	0.0437199
Q96JB5	CDK5RAP3	CDK5 regulatory subunit-associated protein 3 OS=Homo sapiens OX=9606 GN=CDK5RAP3 PE=1 SV=2	28	15	45	15	506	56.9	4.75	361	103	105.3	101.9	97.5	95.2	97.1	103.4	96.6	-	1.07039	0.00519092
Q9P003	CNIH4	Protein cornichon homolog 4 OS=Homo sapiens OX=9606 GN=CNIH4 PE=1 SV=1	14	1	4	1	139	16.1	6.65	89	107.5	101.9	100.8	95.6	95.6	98.6	103.4	96.6	-	1.07039	0.0418526
Q9NVX2	NLE1	Notchless protein homolog 1 OS=Homo sapiens OX=9606 GN=NLE1 PE=1 SV=4	19	6	7	6	485	53.3	7.34	172	99.1	102.2	108.9	95.9	96.5	97.4	103.4	96.6	-	1.07039	0.0806844
Q9UBU6	FAM8A1	Protein FAM8A1 OS=Homo sapiens OX=9606 GN=FAM8A1 PE=1 SV=1	3	1	1	1	413	44.1	7.21	0	99.6	108.5	102.1	94.6	98.9	96.3	103.4	96.6	-	1.07039	0.0810851
O14965	AURKA	Aurora kinase A OS=Homo sapiens OX=9606 GN=AURKA PE=1 SV=2	12	3	4	3	403	45.8	9.39	91	106	105.7	98.5	101.1	94.5	94.2	103.4	96.6	-	1.07039	0.110583
P31483	TIA1	Nucleolysin TIA-1 isoform p40 OS=Homo sapiens OX=9606 GN=TIA1 PE=1 SV=3	21	8	20	5	386	42.9	7.74	225	99.8	105.9	104.5	99.7	95.6	94.5	103.4	96.6	-	1.07039	0.0489144
Q5HYI7	MTX3	Metaxin-3 OS=Homo sapiens OX=9606 GN=MTX3 PE=1 SV=2	17	5	10	5	312	35.1	7.8	68	101.3	103.1	105.7	96.2	96.3	97.3	103.367	96.6	-	1.07005	0.00694074
Q9Y6X4	FAM169A	Soluble lamin-associated protein of 75 kDa OS=Homo sapiens OX=9606 GN=FAM169A PE=1 SV=2	15	7	11	7	670	74.9	4.6	168	103.8	102.1	104.2	95	97.8	97	103.367	96.6	-	1.07005	0.00300999
Q6IAA8	LAMTOR1	Ragulator complex protein LAMTOR1 OS=Homo sapiens OX=9606 GN=LAMTOR1 PE=1 SV=2	25	4	8	4	161	17.7	5.15	168	105.6	103.2	101.4	98.5	95	96.4	103.4	96.6333	-	1.07002	0.0129779
Q9BPW8	NIPSNAP1	Protein NipSnap homolog 1 OS=Homo sapiens OX=9606 GN=NIPSNAP1 PE=1 SV=1	21	7	15	5	284	33.3	9.31	225	106.5	106	97.7	101.4	93.8	94.7	103.4	96.6333	-	1.07002	0.143619
Q01085	TIAL1	Nucleolysin TIAR OS=Homo sapiens OX=9606 GN=TIAL1 PE=1 SV=1	19	6	18	3	375	41.6	7.74	284	101.1	105.9	103.1	96.3	96.7	96.9	103.367	96.6333	-	1.06968	0.00865665
Q13308	PTK7	Inactive tyrosine-protein kinase 7 OS=Homo sapiens OX=9606 GN=PTK7 PE=1 SV=2	5	6	8	6	1070	118.3	7.09	64	108.2	103.3	98.6	98.2	94.8	96.9	103.367	96.6333	-	1.06968	0.0840618
O95139	NDUFB6	NADH dehydrogenase [ubiquinone] 1 beta subcomplex subunit 6 OS=Homo sapiens OX=9606 GN=NDUFB6 PE=1 SV=3	38	5	36	5	128	15.5	9.63	244	105.9	102	102.2	95.9	95.9	98.1	103.367	96.6333	-	1.06968	0.0100547
Q9NY26	SLC39A1	Zinc transporter ZIP1 OS=Homo sapiens OX=9606 GN=SLC39A1 PE=1 SV=1	7	2	6	2	324	34.2	5.92	80	105.7	106.9	97.5	100.2	90.7	99	103.367	96.6333	-	1.06968	0.184214
Q14728	MFSD10	Major facilitator superfamily domain-containing protein 10 OS=Homo sapiens OX=9606 GN=MFSD10 PE=1 SV=1	11	5	9	5	455	48.3	9.6	54	103.3	102.4	104.4	101.7	93.4	94.8	103.367	96.6333	-	1.06968	0.0626081
Q13618	CUL3	Cullin-3 OS=Homo sapiens OX=9606 GN=CUL3 PE=1 SV=2	5	4	4	4	768	88.9	8.48	48	110.5	99.4	100.1	91.6	99.3	99	103.333	96.6333	-	1.06933	0.201192
Q9NY97	B3GNT2	N-acetyllactosaminide beta-1,3-N-acetylglucosaminyltransferase 2 OS=Homo sapiens OX=9606 GN=B3GNT2 PE=1 SV=2	2	1	1	1	397	46	8.54	13	106.5	97.5	106	101.8	95.3	92.8	103.333	96.6333	-	1.06933	0.166345
Q9NR09	BIRC6	Baculoviral IAP repeat-containing protein 6 OS=Homo sapiens OX=9606 GN=BIRC6 PE=1 SV=2	0	1	1	1	4857	529.9	6.05	0	108.1	100.6	101.3	92	99.9	98	103.333	96.6333	-	1.06933	0.118079
Q9NW13	RBM28	RNA-binding protein 28 OS=Homo sapiens OX=9606 GN=RBM28 PE=1 SV=3	32	24	43	24	759	85.7	9.22	419	100.7	107.8	101.5	97.1	95.4	97.4	103.333	96.6333	-	1.06933	0.0452156
Q96DZ1	ERLEC1	Endoplasmic reticulum lectin 1 OS=Homo sapiens OX=9606 GN=ERLEC1 PE=1 SV=1	18	8	16	8	483	54.8	6.28	146	102.2	103.8	104.1	95.9	97.4	96.7	103.367	96.6667	-	1.06931	0.000790105
Q00577	PURA	Transcriptional activator protein Pur-alpha OS=Homo sapiens OX=9606 GN=PURA PE=1 SV=2	18	3	4	3	322	34.9	6.44	116	104.3	103.4	102.3	92	98	100	103.333	96.6667	-	1.06897	0.0542878
P32519	ELF1	ETS-related transcription factor Elf-1 OS=Homo sapiens OX=9606 GN=ELF1 PE=1 SV=2	3	1	1	1	619	67.5	5.21	30	102.7	110.9	96.4	88.1	98.6	103.3	103.333	96.6667	-	1.06897	0.339253
P82094	TMF1	TATA element modulatory factor OS=Homo sapiens OX=9606 GN=TMF1 PE=1 SV=2	20	21	37	21	1093	122.8	4.92	401	103.4	103.3	103.2	97.1	96.2	96.7	103.3	96.6667	-	1.06862	1.55037e-05
Q9Y5J7	TIMM9	Mitochondrial import inner membrane translocase subunit Tim9 OS=Homo sapiens OX=9606 GN=TIMM9 PE=1 SV=1	60	5	14	5	89	10.4	7.21	280	100.2	110.5	99.2	96.4	96	97.6	103.3	96.6667	-	1.06862	0.142771
Q8IXJ6	SIRT2	NAD-dependent protein deacetylase sirtuin-2 OS=Homo sapiens OX=9606 GN=SIRT2 PE=1 SV=2	2	1	2	1	389	43.2	5.36	0	102.8	101.5	105.6	95.3	95	99.7	103.3	96.6667	-	1.06862	0.0268828
Q99798	ACO2	Aconitate hydratase, mitochondrial OS=Homo sapiens OX=9606 GN=ACO2 PE=1 SV=2	41	29	88	29	780	85.4	7.61	1368	106	104.1	99.8	97.7	95.8	96.5	103.3	96.6667	-	1.06862	0.0257696
Q8NHP8	PLBD2	Putative phospholipase B-like 2 OS=Homo sapiens OX=9606 GN=PLBD2 PE=1 SV=2	6	4	9	4	589	65.4	6.8	115	113	98.9	98.1	104.4	91.7	94	103.333	96.7	-	1.0686	0.346252
Q9H6F5	CCDC86	Coiled-coil domain-containing protein 86 OS=Homo sapiens OX=9606 GN=CCDC86 PE=1 SV=1	21	7	14	7	360	40.2	10.33	177	102	107.5	100.4	99.8	94.5	95.8	103.3	96.7	-	1.06825	0.0692891
P63173	RPL38	60S ribosomal protein L38 OS=Homo sapiens OX=9606 GN=RPL38 PE=1 SV=2	24	2	12	2	70	8.2	10.1	119	104.5	101.3	104.1	94.2	98.4	97.5	103.3	96.7	-	1.06825	0.0153556
Q04656	ATP7A	Copper-transporting ATPase 1 OS=Homo sapiens OX=9606 GN=ATP7A PE=1 SV=4	2	3	3	3	1500	163.3	6.33	30	103.6	104	102.3	100.9	94.1	95.1	103.3	96.7	-	1.06825	0.0389268
Q9BZQ8	NIBAN1	Protein Niban 1 OS=Homo sapiens OX=9606 GN=NIBAN1 PE=1 SV=1	11	8	12	8	928	103.1	4.78	149	100.2	99.9	109.7	99.3	92.2	98.6	103.267	96.7	-	1.06791	0.170199
Q29RF7	PDS5A	Sister chromatid cohesion protein PDS5 homolog A OS=Homo sapiens OX=9606 GN=PDS5A PE=1 SV=1	15	19	35	13	1337	150.7	7.91	193	100.5	107.2	102.1	94.3	96.6	99.2	103.267	96.7	-	1.06791	0.0562634
P39060	COL18A1	Collagen alpha-1(XVIII) chain OS=Homo sapiens OX=9606 GN=COL18A1 PE=1 SV=5	4	6	16	6	1754	178.1	6.01	271	107.3	105.4	97.1	100.8	94.5	94.8	103.267	96.7	-	1.06791	0.154311
Q15120	PDK3	[Pyruvate dehydrogenase (acetyl-transferring)] kinase isozyme 3, mitochondrial OS=Homo sapiens OX=9606 GN=PDK3 PE=1 SV=1	4	2	3	2	406	46.9	8.37	14	109.7	97.5	102.6	102.9	93.9	93.3	103.267	96.7	-	1.06791	0.235452
Q14139	UBE4A	Ubiquitin conjugation factor E4 A OS=Homo sapiens OX=9606 GN=UBE4A PE=1 SV=2	11	11	13	11	1066	122.5	5.24	57	100.7	104.8	104.3	95.9	95.8	98.5	103.267	96.7333	-	1.06754	0.0139753
Q9Y5W7	SNX14	Sorting nexin-14 OS=Homo sapiens OX=9606 GN=SNX14 PE=1 SV=3	6	6	11	6	946	110.1	6.7	97	106.4	100	103.4	95.5	96	98.7	103.267	96.7333	-	1.06754	0.035779
Q9BQE4	SELENOS	Selenoprotein S OS=Homo sapiens OX=9606 GN=SELENOS PE=1 SV=3	35	5	8	5	189	21.2	9.7	162	101.9	108.1	99.8	98	95.6	96.6	103.267	96.7333	-	1.06754	0.0649741
Q99985	SEMA3C	Semaphorin-3C OS=Homo sapiens OX=9606 GN=SEMA3C PE=2 SV=2	6	4	5	4	751	85.2	8.69	40	109.4	97.6	102.8	96.4	96.7	97.1	103.267	96.7333	-	1.06754	0.128727
Q8NHQ9	DDX55	ATP-dependent RNA helicase DDX55 OS=Homo sapiens OX=9606 GN=DDX55 PE=1 SV=3	12	6	7	6	600	68.5	9.25	83	101.6	111.1	97.1	97	95.9	97.3	103.267	96.7333	-	1.06754	0.190395
Q96P11	NSUN5	Probable 28S rRNA (cytosine-C(5))-methyltransferase OS=Homo sapiens OX=9606 GN=NSUN5 PE=1 SV=2	30	11	18	11	429	46.7	8.62	267	101.1	106.1	102.5	95.9	98.6	95.7	103.233	96.7333	-	1.0672	0.0209013
Q9BZM5	ULBP2	UL16-binding protein 2 OS=Homo sapiens OX=9606 GN=ULBP2 PE=1 SV=1	8	2	2	2	246	27.4	7.3	0	103.4	106.1	100.2	95	97.3	97.9	103.233	96.7333	-	1.0672	0.0276759
P83916	CBX1	Chromobox protein homolog 1 OS=Homo sapiens OX=9606 GN=CBX1 PE=1 SV=1	36	7	17	6	185	21.4	4.93	387	99.7	106.6	103.5	95.2	98.6	96.5	103.267	96.7667	-	1.06717	0.0433329
Q8NCG7	DAGLB	Sn1-specific diacylglycerol lipase beta OS=Homo sapiens OX=9606 GN=DAGLB PE=1 SV=2	10	5	7	5	672	73.7	6.55	100	102.9	106.2	100.7	98.6	96.8	94.9	103.267	96.7667	-	1.06717	0.0277541
P49768	PSEN1	Presenilin-1 OS=Homo sapiens OX=9606 GN=PSEN1 PE=1 SV=1	16	5	7	5	467	52.6	5.31	175	107.6	100.7	101.5	98.8	95.9	95.6	103.267	96.7667	-	1.06717	0.0540066
P06865	HEXA	Beta-hexosaminidase subunit alpha OS=Homo sapiens OX=9606 GN=HEXA PE=1 SV=2	19	10	19	9	529	60.7	5.16	155	113.2	97.7	98.8	104.2	93.5	92.6	103.233	96.7667	-	1.06683	0.357915
P04920	SLC4A2	Anion exchange protein 2 OS=Homo sapiens OX=9606 GN=SLC4A2 PE=1 SV=4	5	5	12	5	1241	136.9	6.29	135	102.5	104	103.2	98.1	94.3	97.9	103.233	96.7667	-	1.06683	0.00780578
P78552	IL13RA1	Interleukin-13 receptor subunit alpha-1 OS=Homo sapiens OX=9606 GN=IL13RA1 PE=1 SV=1	3	1	1	1	427	48.7	6.01	42	111.3	98.3	100	95.6	98.8	95.9	103.2	96.7667	-	1.06648	0.200801
P17405	SMPD1	Sphingomyelin phosphodiesterase OS=Homo sapiens OX=9606 GN=SMPD1 PE=1 SV=5	3	2	3	2	631	69.9	7.28	0	108.7	97.2	103.7	101.5	95.2	93.6	103.2	96.7667	-	1.06648	0.192629
P19447	ERCC3	General transcription and DNA repair factor IIH helicase subunit XPB OS=Homo sapiens OX=9606 GN=ERCC3 PE=1 SV=1	5	4	5	4	782	89.2	7.23	47	103.8	109.8	96	92.6	95.5	102.2	103.2	96.7667	-	1.06648	0.259725
Q6BCY4	CYB5R2	NADH-cytochrome b5 reductase 2 OS=Homo sapiens OX=9606 GN=CYB5R2 PE=1 SV=1	6	2	2	2	276	31.4	8.5	0	100.9	99.7	109	94	97.4	99	103.2	96.8	-	1.06612	0.122081
P16383	GCFC2	GC-rich sequence DNA-binding factor 2 OS=Homo sapiens OX=9606 GN=GCFC2 PE=1 SV=2	7	5	6	5	781	89.3	5.99	61	101.4	101.5	106.7	94.6	96.5	99.3	103.2	96.8	-	1.06612	0.0448599
O14949	UQCRQ	Cytochrome b-c1 complex subunit 8 OS=Homo sapiens OX=9606 GN=UQCRQ PE=1 SV=4	33	5	14	5	82	9.9	10.08	171	102.4	106.2	101	96.1	97.3	97	103.2	96.8	-	1.06612	0.0159557
P54619	PRKAG1	5'-AMP-activated protein kinase subunit gamma-1 OS=Homo sapiens OX=9606 GN=PRKAG1 PE=1 SV=1	17	6	7	6	331	37.6	6.92	74	107.9	101.7	100	100.3	95.2	94.9	103.2	96.8	-	1.06612	0.0976125
Q8N1F8	STK11IP	Serine/threonine-protein kinase 11-interacting protein OS=Homo sapiens OX=9606 GN=STK11IP PE=1 SV=4	5	5	6	5	1088	120.2	5.36	29	100.3	104.4	104.9	95.6	98.7	96.1	103.2	96.8	-	1.06612	0.0214546
Q9Y5K8	ATP6V1D	V-type proton ATPase subunit D OS=Homo sapiens OX=9606 GN=ATP6V1D PE=1 SV=1	18	4	9	4	247	28.2	9.36	101	98.7	103.4	107.5	97.2	96.3	96.9	103.2	96.8	-	1.06612	0.0664907
Q15043	SLC39A14	Zinc transporter ZIP14 OS=Homo sapiens OX=9606 GN=SLC39A14 PE=1 SV=3	13	6	23	6	492	54.2	5.33	416	102.7	109.2	97.6	95.5	98.7	96.2	103.167	96.8	-	1.06577	0.142555
Q9H7D7	WDR26	WD repeat-containing protein 26 OS=Homo sapiens OX=9606 GN=WDR26 PE=1 SV=3	4	3	4	3	661	72.1	6.16	30	102	99.2	108.3	96.4	94.1	99.9	103.167	96.8	-	1.06577	0.115473
Q13206	DDX10	Probable ATP-dependent RNA helicase DDX10 OS=Homo sapiens OX=9606 GN=DDX10 PE=1 SV=2	20	15	26	15	875	100.8	8.63	193	101.2	106.9	101.4	96.1	96.4	97.9	103.167	96.8	-	1.06577	0.0308767
Q9H9F9	ACTR5	Actin-related protein 5 OS=Homo sapiens OX=9606 GN=ACTR5 PE=1 SV=2	3	1	2	1	607	68.3	5.27	0	103.4	104.2	101.9	90.6	99.1	100.8	103.167	96.8333	-	1.0654	0.121131
P55263	ADK	Adenosine kinase OS=Homo sapiens OX=9606 GN=ADK PE=1 SV=2	5	2	3	2	362	40.5	6.7	29	106.9	99.7	102.9	94.2	97.3	99	103.167	96.8333	-	1.0654	0.0653
Q9NVF7	FBXO28	F-box only protein 28 OS=Homo sapiens OX=9606 GN=FBXO28 PE=1 SV=1	4	1	1	1	368	41.1	9.55	25	106.5	82.6	120.4	94.8	109.4	86.3	103.167	96.8333	-	1.0654	0.650068
P52701	MSH6	DNA mismatch repair protein Msh6 OS=Homo sapiens OX=9606 GN=MSH6 PE=1 SV=2	21	27	65	27	1360	152.7	6.9	743	100.5	100.9	108.1	95.4	97.8	97.3	103.167	96.8333	-	1.0654	0.0697476
P09038	FGF2	Fibroblast growth factor 2 OS=Homo sapiens OX=9606 GN=FGF2 PE=1 SV=3	7	2	3	2	288	30.8	11.18	15	107.2	107.2	95.1	91.9	95.6	103	103.167	96.8333	-	1.0654	0.289215
Q8WV22	NSMCE1	Non-structural maintenance of chromosomes element 1 homolog OS=Homo sapiens OX=9606 GN=NSMCE1 PE=1 SV=5	10	3	4	3	266	30.8	7.47	22	102.3	100.3	106.9	98.2	92.5	99.8	103.167	96.8333	-	1.0654	0.0986376
Q9Y3Q3	TMED3	Transmembrane emp24 domain-containing protein 3 OS=Homo sapiens OX=9606 GN=TMED3 PE=1 SV=1	9	2	4	2	217	24.8	5.6	44	100.9	98.1	110.5	92.7	104.8	93.1	103.167	96.8667	-	1.06504	0.313053
Q9NQT5	EXOSC3	Exosome complex component RRP40 OS=Homo sapiens OX=9606 GN=EXOSC3 PE=1 SV=3	22	4	10	4	275	29.6	8.1	153	101.7	107.2	100.5	96.1	95.3	99.2	103.133	96.8667	-	1.06469	0.0580638
Q9NW64	RBM22	Pre-mRNA-splicing factor RBM22 OS=Homo sapiens OX=9606 GN=RBM22 PE=1 SV=1	24	10	16	10	420	46.9	8.54	183	105.6	104.3	99.5	96.4	97.6	96.6	103.133	96.8667	-	1.06469	0.0295838
Q9NXE8	CWC25	Pre-mRNA-splicing factor CWC25 homolog OS=Homo sapiens OX=9606 GN=CWC25 PE=1 SV=1	7	3	3	3	425	49.6	10.18	52	93.8	104.1	111.5	97.7	94.8	98.1	103.133	96.8667	-	1.06469	0.297501
Q8IWA0	WDR75	WD repeat-containing protein 75 OS=Homo sapiens OX=9606 GN=WDR75 PE=1 SV=1	13	11	22	11	830	94.4	5.96	324	104.2	104.1	101.1	95.4	96.7	98.5	103.133	96.8667	-	1.06469	0.00990294
P49736	MCM2	DNA replication licensing factor MCM2 OS=Homo sapiens OX=9606 GN=MCM2 PE=1 SV=4	17	15	34	15	904	101.8	5.52	450	99.9	107.1	102.4	94.4	97.7	98.5	103.133	96.8667	-	1.06469	0.0631566
Q8IY18	SMC5	Structural maintenance of chromosomes protein 5 OS=Homo sapiens OX=9606 GN=SMC5 PE=1 SV=2	8	8	12	8	1101	128.7	8.38	67	97.1	102.1	110.2	94	100.1	96.5	103.133	96.8667	-	1.06469	0.210612
Q9P0I2	EMC3	ER membrane protein complex subunit 3 OS=Homo sapiens OX=9606 GN=EMC3 PE=1 SV=3	26	7	15	7	261	29.9	6.81	302	103.3	103	103.1	98.6	97.5	94.5	103.133	96.8667	-	1.06469	0.00697474
O95619	YEATS4	YEATS domain-containing protein 4 OS=Homo sapiens OX=9606 GN=YEATS4 PE=1 SV=1	17	4	6	4	227	26.5	8.41	28	104.3	103.3	101.8	98.4	97.5	94.7	103.133	96.8667	-	1.06469	0.00922742
Q1ED39	KNOP1	Lysine-rich nucleolar protein 1 OS=Homo sapiens OX=9606 GN=KNOP1 PE=1 SV=1	34	12	21	12	458	51.6	9.86	303	102.3	103.5	103.5	96.9	95.5	98.2	103.1	96.8667	-	1.06435	0.00206343
P26651	ZFP36	mRNA decay activator protein ZFP36 OS=Homo sapiens OX=9606 GN=ZFP36 PE=1 SV=1	6	1	1	1	326	34	8.48	70	107.8	97.8	103.7	96.4	92.9	101.3	103.1	96.8667	-	1.06435	0.175307
P01034	CST3	Cystatin-C OS=Homo sapiens OX=9606 GN=CST3 PE=1 SV=1	19	2	3	2	146	15.8	8.75	44	108	107	94.3	105.4	91.1	94.1	103.1	96.8667	-	1.06435	0.371363
P56537	EIF6	Eukaryotic translation initiation factor 6 OS=Homo sapiens OX=9606 GN=EIF6 PE=1 SV=1	37	6	18	6	245	26.6	4.68	365	104.3	102.3	102.7	96.7	97.6	96.3	103.1	96.8667	-	1.06435	0.000989153
P20340	RAB6A	Ras-related protein Rab-6A OS=Homo sapiens OX=9606 GN=RAB6A PE=1 SV=3	43	11	48	5	208	23.6	5.54	516	103.3	106.6	99.4	97	94.5	99.1	103.1	96.8667	-	1.06435	0.0650607
P51531	SMARCA2	Probable global transcription activator SNF2L2 OS=Homo sapiens OX=9606 GN=SMARCA2 PE=1 SV=2	2	3	3	3	1590	181.2	7.2	19	99.9	104	105.3	100.7	94.6	95.3	103.067	96.8667	-	1.06401	0.0698392
P49755	TMED10	Transmembrane emp24 domain-containing protein 10 OS=Homo sapiens OX=9606 GN=TMED10 PE=1 SV=2	30	6	32	6	219	25	7.44	554	101.5	105.5	102.3	98.2	94.7	97.8	103.1	96.9	-	1.06398	0.0197474
Q8N7H5	PAF1	RNA polymerase II-associated factor 1 homolog OS=Homo sapiens OX=9606 GN=PAF1 PE=1 SV=2	31	16	41	16	531	59.9	4.63	484	100	103.3	106	98.6	96.3	95.8	103.1	96.9	-	1.06398	0.0328932
Q13129	RLF	Zinc finger protein Rlf OS=Homo sapiens OX=9606 GN=RLF PE=1 SV=2	1	2	2	2	1914	217.8	6.77	21	105.1	100	104.2	95.6	100.3	94.8	103.1	96.9	-	1.06398	0.0561109
Q8NC56	LEMD2	LEM domain-containing protein 2 OS=Homo sapiens OX=9606 GN=LEMD2 PE=1 SV=1	30	14	38	14	503	56.9	9	600	102.8	104.8	101.7	99.7	95.3	95.7	103.1	96.9	-	1.06398	0.0207007
O15382	BCAT2	Branched-chain-amino-acid aminotransferase, mitochondrial OS=Homo sapiens OX=9606 GN=BCAT2 PE=1 SV=2	18	6	13	6	392	44.3	8.65	266	104.2	104	101.1	95.8	98.8	96.1	103.1	96.9	-	1.06398	0.0109709
P17050	NAGA	Alpha-N-acetylgalactosaminidase OS=Homo sapiens OX=9606 GN=NAGA PE=1 SV=2	3	1	2	1	411	46.5	5.19	0	107.5	102.2	99.6	97.4	97.2	96.1	103.1	96.9	-	1.06398	0.0583198
P17174	GOT1	Aspartate aminotransferase, cytoplasmic OS=Homo sapiens OX=9606 GN=GOT1 PE=1 SV=3	18	6	11	6	413	46.2	7.01	39	98.1	90.6	120.5	95	98.4	97.3	103.067	96.9	-	1.06364	0.532476
Q96TC7	RMDN3	Regulator of microtubule dynamics protein 3 OS=Homo sapiens OX=9606 GN=RMDN3 PE=1 SV=2	23	9	23	9	470	52.1	5.1	397	103.1	104.7	101.5	95	96.1	99.7	103.1	96.9333	-	1.06362	0.021936
Q9NWM8	FKBP14	Peptidyl-prolyl cis-trans isomerase FKBP14 OS=Homo sapiens OX=9606 GN=FKBP14 PE=1 SV=1	7	1	1	1	211	24.2	6.07	0	102.7	105.7	100.9	96.5	96.8	97.5	103.1	96.9333	-	1.06362	0.0125527
P49419	ALDH7A1	Alpha-aminoadipic semialdehyde dehydrogenase OS=Homo sapiens OX=9606 GN=ALDH7A1 PE=1 SV=5	25	12	20	12	539	58.5	7.99	153	103.3	103.4	102.6	97.9	96.4	96.5	103.1	96.9333	-	1.06362	0.000349458
P52756	RBM5	RNA-binding protein 5 OS=Homo sapiens OX=9606 GN=RBM5 PE=1 SV=2	15	12	20	10	815	92.1	6.28	183	102.9	102.7	103.6	97.1	98.5	95.2	103.067	96.9333	-	1.06327	0.00350864
P49792	RANBP2	E3 SUMO-protein ligase RanBP2 OS=Homo sapiens OX=9606 GN=RANBP2 PE=1 SV=2	25	68	134	48	3224	358	6.2	1547	102.3	105.2	101.7	97.9	95.6	97.3	103.067	96.9333	-	1.06327	0.00873653
Q8TF01	PNISR	Arginine/serine-rich protein PNISR OS=Homo sapiens OX=9606 GN=PNISR PE=1 SV=2	2	2	2	2	805	92.5	10.02	25	89.1	98.9	121.2	96.6	95.5	98.7	103.067	96.9333	-	1.06327	0.555445
Q9GZR7	DDX24	ATP-dependent RNA helicase DDX24 OS=Homo sapiens OX=9606 GN=DDX24 PE=1 SV=1	19	17	27	17	859	96.3	9.06	374	99.1	107	103.1	97.9	95.2	97.7	103.067	96.9333	-	1.06327	0.0658288
P33908	MAN1A1	Mannosyl-oligosaccharide 1,2-alpha-mannosidase IA OS=Homo sapiens OX=9606 GN=MAN1A1 PE=1 SV=3	5	3	4	2	653	72.9	6.47	29	102.5	98.1	108.6	94.3	95.8	100.7	103.067	96.9333	-	1.06327	0.164175
Q6P1N9	TATDN1	Putative deoxyribonuclease TATDN1 OS=Homo sapiens OX=9606 GN=TATDN1 PE=1 SV=2	9	3	4	2	297	33.6	6.96	31	102.3	101.7	105.2	94.4	97.2	99.2	103.067	96.9333	-	1.06327	0.0253432
Q96BD5	PHF21A	PHD finger protein 21A OS=Homo sapiens OX=9606 GN=PHF21A PE=1 SV=1	6	3	3	3	680	74.8	9.45	66	100.7	99.7	108.7	95	94.8	101	103.033	96.9333	-	1.06293	0.156301
P08240	SRPRA	Signal recognition particle receptor subunit alpha OS=Homo sapiens OX=9606 GN=SRPRA PE=1 SV=2	37	22	69	22	638	69.8	8.95	914	102.8	105.3	101	99.2	96.1	95.5	103.033	96.9333	-	1.06293	0.0227295
Q8TA86	RP9	Retinitis pigmentosa 9 protein OS=Homo sapiens OX=9606 GN=RP9 PE=1 SV=2	13	2	2	2	221	26.1	9.79	0	101.2	107.2	100.7	94.6	95.1	101.1	103.033	96.9333	-	1.06293	0.107784
Q96EY1	DNAJA3	DnaJ homolog subfamily A member 3, mitochondrial OS=Homo sapiens OX=9606 GN=DNAJA3 PE=1 SV=2	16	8	24	8	480	52.5	9.26	239	104.9	103	101.3	97.5	96.9	96.5	103.067	96.9667	-	1.06291	0.00483329
Q9NX58	LYAR	Cell growth-regulating nucleolar protein OS=Homo sapiens OX=9606 GN=LYAR PE=1 SV=2	31	10	21	10	379	43.6	9.54	331	102.3	104.7	102.2	97	98.3	95.6	103.067	96.9667	-	1.06291	0.00568814
Q9NVZ3	NECAP2	Adaptin ear-binding coat-associated protein 2 OS=Homo sapiens OX=9606 GN=NECAP2 PE=1 SV=1	5	1	1	1	263	28.3	8.38	28	102.8	104.4	102	96.6	95.6	98.7	103.067	96.9667	-	1.06291	0.00614945
O60832	DKC1	H/ACA ribonucleoprotein complex subunit DKC1 OS=Homo sapiens OX=9606 GN=DKC1 PE=1 SV=3	30	16	35	16	514	57.6	9.42	475	102	106.7	100.5	97.3	96.9	96.7	103.067	96.9667	-	1.06291	0.0313217
Q96K19	RNF170	E3 ubiquitin-protein ligase RNF170 OS=Homo sapiens OX=9606 GN=RNF170 PE=1 SV=2	13	3	5	3	258	29.8	5.58	57	101.7	101.5	106	94.2	99.2	97.5	103.067	96.9667	-	1.06291	0.0424464
Q7Z2T5	TRMT1L	TRMT1-like protein OS=Homo sapiens OX=9606 GN=TRMT1L PE=1 SV=2	8	5	6	5	733	81.7	7.88	60	102.7	106	100.4	93.4	101.5	96	103.033	96.9667	-	1.06256	0.103602
P46087	NOP2	Probable 28S rRNA (cytosine(4447)-C(5))-methyltransferase OS=Homo sapiens OX=9606 GN=NOP2 PE=1 SV=2	32	22	73	22	812	89.2	9.23	1481	99.9	105.8	103.4	98.5	95.9	96.5	103.033	96.9667	-	1.06256	0.032316
Q9NQT8	KIF13B	Kinesin-like protein KIF13B OS=Homo sapiens OX=9606 GN=KIF13B PE=1 SV=2	1	1	2	1	1826	202.7	5.88	15	107.4	99.2	102.5	98.7	96.1	96.1	103.033	96.9667	-	1.06256	0.0748999
Q9BYC9	MRPL20	39S ribosomal protein L20, mitochondrial OS=Homo sapiens OX=9606 GN=MRPL20 PE=1 SV=1	26	3	5	3	149	17.4	10.86	25	103.2	105.1	100.8	99.2	96.2	95.5	103.033	96.9667	-	1.06256	0.022703
P30154	PPP2R1B	Serine/threonine-protein phosphatase 2A 65 kDa regulatory subunit A beta isoform OS=Homo sapiens OX=9606 GN=PPP2R1B PE=1 SV=3	5	3	5	2	601	66.2	4.94	13	110.8	98.7	99.5	97.4	96.9	96.6	103	96.9667	-	1.06222	0.198038
Q9H2H9	SLC38A1	Sodium-coupled neutral amino acid transporter 1 OS=Homo sapiens OX=9606 GN=SLC38A1 PE=1 SV=1	13	8	20	8	487	54	7.02	133	103.4	102.5	103.1	96.4	98	96.5	103	96.9667	-	1.06222	0.000486166
Q16881	TXNRD1	Thioredoxin reductase 1, cytoplasmic OS=Homo sapiens OX=9606 GN=TXNRD1 PE=1 SV=3	11	6	7	5	649	70.9	7.39	28	103.4	101.3	104.3	97.8	95.5	97.6	103	96.9667	-	1.06222	0.00638639
P30038	ALDH4A1	Delta-1-pyrroline-5-carboxylate dehydrogenase, mitochondrial OS=Homo sapiens OX=9606 GN=ALDH4A1 PE=1 SV=3	29	15	38	15	563	61.7	8.07	319	103.8	104.8	100.4	98.1	96.1	96.7	103	96.9667	-	1.06222	0.0143838
Q16850	CYP51A1	Lanosterol 14-alpha demethylase OS=Homo sapiens OX=9606 GN=CYP51A1 PE=1 SV=3	17	8	12	8	503	56.8	8.53	194	103.9	103	102.1	93.9	98.5	98.5	103	96.9667	-	1.06222	0.0203568
O15173	PGRMC2	Membrane-associated progesterone receptor component 2 OS=Homo sapiens OX=9606 GN=PGRMC2 PE=1 SV=1	37	10	29	9	223	23.8	4.88	631	104.3	100.5	104.2	96.2	96.5	98.2	103	96.9667	-	1.06222	0.012454
Q96GM8	TOE1	Target of EGR1 protein 1 OS=Homo sapiens OX=9606 GN=TOE1 PE=1 SV=1	8	4	6	4	510	56.5	7.18	39	102.7	104	102.4	95.8	97.9	97.3	103.033	97	-	1.0622	0.00161262
Q9UBB5	MBD2	Methyl-CpG-binding domain protein 2 OS=Homo sapiens OX=9606 GN=MBD2 PE=1 SV=1	6	2	3	2	411	43.2	10.04	70	104.3	100.1	104.7	94.2	97.4	99.4	103.033	97	-	1.0622	0.0460419
Q96AX1	VPS33A	Vacuolar protein sorting-associated protein 33A OS=Homo sapiens OX=9606 GN=VPS33A PE=1 SV=1	8	5	8	5	596	67.6	6.96	51	103.3	101.7	104	96.9	97.1	97	103	97	-	1.06186	0.000926681
P61006	RAB8A	Ras-related protein Rab-8A OS=Homo sapiens OX=9606 GN=RAB8A PE=1 SV=1	48	11	66	5	207	23.7	9.07	819	103.1	107.4	98.5	96.6	96.8	97.6	103	97	-	1.06186	0.0812633
Q96HP4	OXNAD1	Oxidoreductase NAD-binding domain-containing protein 1 OS=Homo sapiens OX=9606 GN=OXNAD1 PE=1 SV=1	13	3	6	3	312	34.8	8.37	117	102.7	102.2	104.1	97.5	97.6	95.9	103	97	-	1.06186	0.00162491
Q3MHD2	LSM12	Protein LSM12 homolog OS=Homo sapiens OX=9606 GN=LSM12 PE=1 SV=2	23	4	7	4	195	21.7	7.74	68	96.4	102.6	110	93.4	98.3	99.3	103	97	-	1.06186	0.238386
P56377	AP1S2	AP-1 complex subunit sigma-2 OS=Homo sapiens OX=9606 GN=AP1S2 PE=1 SV=1	20	3	4	2	157	18.6	5.47	26	101.9	106.5	100.6	98.9	95.2	96.9	103	97	-	1.06186	0.0451091
Q8IUW5	RELL1	RELT-like protein 1 OS=Homo sapiens OX=9606 GN=RELL1 PE=1 SV=1	6	1	1	1	271	29.3	8.34	21	102	102.2	104.8	96.7	99.6	94.7	103	97	-	1.06186	0.0235346
Q02978	SLC25A11	Mitochondrial 2-oxoglutarate/malate carrier protein OS=Homo sapiens OX=9606 GN=SLC25A11 PE=1 SV=3	28	8	19	8	314	34	9.91	347	104.5	105.2	99.3	97.4	96	97.6	103	97	-	1.06186	0.0357939
Q9NZN8	CNOT2	CCR4-NOT transcription complex subunit 2 OS=Homo sapiens OX=9606 GN=CNOT2 PE=1 SV=1	5	2	3	2	540	59.7	7.66	42	91.2	112.5	105.3	95.4	98.4	97.2	103	97	-	1.06186	0.395912
Q15067	ACOX1	Peroxisomal acyl-coenzyme A oxidase 1 OS=Homo sapiens OX=9606 GN=ACOX1 PE=1 SV=3	15	9	11	9	660	74.4	8.16	136	107.3	101.9	99.7	97.4	91.2	102.4	102.967	97	-	1.06151	0.20529
O43426	SYNJ1	Synaptojanin-1 OS=Homo sapiens OX=9606 GN=SYNJ1 PE=1 SV=2	1	2	2	2	1573	173	7.42	21	101.4	100.9	106.6	100.9	94.1	96	102.967	97	-	1.06151	0.0937155
Q14966	ZNF638	Zinc finger protein 638 OS=Homo sapiens OX=9606 GN=ZNF638 PE=1 SV=2	14	26	44	26	1978	220.5	6.38	411	101.3	102.8	104.8	99.5	95.7	95.8	102.967	97	-	1.06151	0.0207135
O75348	ATP6V1G1	V-type proton ATPase subunit G 1 OS=Homo sapiens OX=9606 GN=ATP6V1G1 PE=1 SV=3	41	4	11	4	118	13.7	8.79	261	88.3	109.1	111.6	95.8	97.1	98.2	103	97.0333	-	1.06149	0.466272
O95873	C6orf47	Uncharacterized protein C6orf47 OS=Homo sapiens OX=9606 GN=C6orf47 PE=1 SV=2	6	2	3	2	294	31.7	6.37	29	98.2	107.8	103	95.4	99.1	96.6	103	97.0333	-	1.06149	0.115632
Q5XKP0	MICOS13	MICOS complex subunit MIC13 OS=Homo sapiens OX=9606 GN=MICOS13 PE=1 SV=1	6	1	3	1	118	13.1	9.42	36	101.9	113.7	93.3	102.6	94.3	94.2	102.967	97.0333	-	1.06115	0.415298
P13473	LAMP2	Lysosome-associated membrane glycoprotein 2 OS=Homo sapiens OX=9606 GN=LAMP2 PE=1 SV=2	7	3	9	3	410	44.9	5.63	62	108.7	104.6	95.6	100.6	93.3	97.2	102.967	97.0333	-	1.06115	0.249364
Q9ULX6	AKAP8L	A-kinase anchor protein 8-like OS=Homo sapiens OX=9606 GN=AKAP8L PE=1 SV=4	16	9	16	9	646	71.6	5.05	301	102.4	104.7	101.8	98.6	96.7	95.8	102.967	97.0333	-	1.06115	0.00800521
Q9UJV9	DDX41	Probable ATP-dependent RNA helicase DDX41 OS=Homo sapiens OX=9606 GN=DDX41 PE=1 SV=2	20	12	21	12	622	69.8	6.84	158	102.7	103.7	102.5	98.3	96.8	96	102.967	97.0333	-	1.06115	0.00152309
Q9BZM4	ULBP3	UL16-binding protein 3 OS=Homo sapiens OX=9606 GN=ULBP3 PE=1 SV=1	4	1	3	1	244	27.9	8.02	21	101.2	105.1	102.6	99.6	94.2	97.3	102.967	97.0333	-	1.06115	0.0374966
Q9P035	HACD3	Very-long-chain (3R)-3-hydroxyacyl-CoA dehydratase 3 OS=Homo sapiens OX=9606 GN=HACD3 PE=1 SV=2	19	7	28	7	362	43.1	8.94	427	102.4	106.3	100.1	98.5	96.5	96.1	102.933	97.0333	-	1.0608	0.0392978
Q9UJX2	CDC23	Cell division cycle protein 23 homolog OS=Homo sapiens OX=9606 GN=CDC23 PE=1 SV=3	4	3	5	3	597	68.8	7.02	25	100.5	97.7	110.6	94.4	98.4	98.3	102.933	97.0333	-	1.0608	0.226608
Q9Y6G3	MRPL42	39S ribosomal protein L42, mitochondrial OS=Homo sapiens OX=9606 GN=MRPL42 PE=1 SV=1	11	1	2	1	142	16.7	8.35	66	104.1	105	99.7	101	94.4	95.7	102.933	97.0333	-	1.0608	0.0857298
Q13530	SERINC3	Serine incorporator 3 OS=Homo sapiens OX=9606 GN=SERINC3 PE=2 SV=2	5	3	4	3	473	52.5	7.46	20	99.1	105.6	104.1	97.2	92.6	101.3	102.933	97.0333	-	1.0608	0.138057
Q02447	SP3	Transcription factor Sp3 OS=Homo sapiens OX=9606 GN=SP3 PE=1 SV=3	2	1	1	1	781	81.9	5.26	21	101	103.4	104.4	101.5	93.2	96.5	102.933	97.0667	-	1.06044	0.0882926
Q9NZN5	ARHGEF12	Rho guanine nucleotide exchange factor 12 OS=Homo sapiens OX=9606 GN=ARHGEF12 PE=1 SV=1	3	3	4	3	1544	173.1	5.74	25	120.8	99.7	88.3	95.3	92.9	103	102.933	97.0667	-	1.06044	0.588789
Q9H300	PARL	Presenilins-associated rhomboid-like protein, mitochondrial OS=Homo sapiens OX=9606 GN=PARL PE=1 SV=2	16	5	10	5	379	42.2	9.79	131	101.5	104.2	103.1	96	98.2	97	102.933	97.0667	-	1.06044	0.00436159
Q96RS6	NUDCD1	NudC domain-containing protein 1 OS=Homo sapiens OX=9606 GN=NUDCD1 PE=1 SV=2	8	5	6	5	583	66.7	5.11	67	103.6	103	102.2	89.3	100.2	101.7	102.933	97.0667	-	1.06044	0.209628
Q9UIU6	SIX4	Homeobox protein SIX4 OS=Homo sapiens OX=9606 GN=SIX4 PE=1 SV=2	2	1	1	1	781	82.9	5.71	0	91.4	96.8	120.6	95.2	93.7	102.3	102.933	97.0667	-	1.06044	0.564549
Q9BQG2	NUDT12	Peroxisomal NADH pyrophosphatase NUDT12 OS=Homo sapiens OX=9606 GN=NUDT12 PE=1 SV=1	4	2	2	2	462	52	6.83	42	109.1	104.3	95.4	102.1	93.4	95.7	102.933	97.0667	-	1.06044	0.287295
Q96NC0	ZMAT2	Zinc finger matrin-type protein 2 OS=Homo sapiens OX=9606 GN=ZMAT2 PE=1 SV=1	18	3	4	3	199	23.6	9.01	71	105.9	103.8	99.1	99.8	94.4	97	102.933	97.0667	-	1.06044	0.082391
Q99805	TM9SF2	Transmembrane 9 superfamily member 2 OS=Homo sapiens OX=9606 GN=TM9SF2 PE=1 SV=1	14	8	21	8	663	75.7	7.44	109	100	106.3	102.4	97.3	96.1	97.8	102.9	97.0667	-	1.0601	0.0375099
Q6P4Q7	CNNM4	Metal transporter CNNM4 OS=Homo sapiens OX=9606 GN=CNNM4 PE=1 SV=3	11	7	13	7	775	86.6	6.07	199	102.7	102.9	103.1	99.2	96.5	95.5	102.9	97.0667	-	1.0601	0.00629607
P19256	CD58	Lymphocyte function-associated antigen 3 OS=Homo sapiens OX=9606 GN=CD58 PE=1 SV=1	14	4	7	4	250	28.1	6.76	24	105.1	102.5	101.1	99.4	94.8	97	102.9	97.0667	-	1.0601	0.0301276
P10809	HSPD1	60 kDa heat shock protein, mitochondrial OS=Homo sapiens OX=9606 GN=HSPD1 PE=1 SV=2	57	32	287	32	573	61	5.87	6260	103.7	105.7	99.3	99	95.9	96.3	102.9	97.0667	-	1.0601	0.0517225
Q9UI09	NDUFA12	NADH dehydrogenase [ubiquinone] 1 alpha subcomplex subunit 12 OS=Homo sapiens OX=9606 GN=NDUFA12 PE=1 SV=1	37	5	16	5	145	17.1	9.63	166	107.8	102.9	98.1	97.7	96.7	96.9	102.933	97.1	-	1.06008	0.107121
Q6UXD5	SEZ6L2	Seizure 6-like protein 2 OS=Homo sapiens OX=9606 GN=SEZ6L2 PE=1 SV=2	5	4	6	4	910	97.5	4.89	70	105.6	107.2	95.9	110.3	89.1	91.9	102.9	97.1	-	1.05973	0.484032
Q9Y617	PSAT1	Phosphoserine aminotransferase OS=Homo sapiens OX=9606 GN=PSAT1 PE=1 SV=2	14	5	10	5	370	40.4	7.66	98	105.1	96.7	106.9	94.9	96.6	99.8	102.9	97.1	-	1.05973	0.168594
Q5SWX8	ODR4	Protein odr-4 homolog OS=Homo sapiens OX=9606 GN=ODR4 PE=1 SV=1	13	7	13	7	454	51.1	5.92	123	97	101.3	110.4	98.5	95.6	97.2	102.9	97.1	-	1.05973	0.224266
P82664	MRPS10	28S ribosomal protein S10, mitochondrial OS=Homo sapiens OX=9606 GN=MRPS10 PE=1 SV=2	24	4	7	4	201	23	8	185	103.7	104.1	100.9	98.5	95.3	97.5	102.9	97.1	-	1.05973	0.0136914
O95249	GOSR1	Golgi SNAP receptor complex member 1 OS=Homo sapiens OX=9606 GN=GOSR1 PE=1 SV=1	17	5	6	5	250	28.6	9.42	22	99.5	104.8	104.4	104.4	92.9	94	102.9	97.1	-	1.05973	0.224499
Q9H410	DSN1	Kinetochore-associated protein DSN1 homolog OS=Homo sapiens OX=9606 GN=DSN1 PE=1 SV=2	11	4	4	4	356	40	7.05	51	87.8	105.1	115.8	95.5	99.6	96.2	102.9	97.1	-	1.05973	0.521043
Q8NBL1	POGLUT1	Protein O-glucosyltransferase 1 OS=Homo sapiens OX=9606 GN=POGLUT1 PE=1 SV=1	9	4	6	4	392	46.2	8.72	69	97.5	88.4	122.8	100.9	95.4	95	102.9	97.1	-	1.05973	0.608964
Q5VUA4	ZNF318	Zinc finger protein 318 OS=Homo sapiens OX=9606 GN=ZNF318 PE=1 SV=2	1	2	2	2	2279	251	7.2	39	100.2	109.2	99.3	99	96.4	95.9	102.9	97.1	-	1.05973	0.153989
Q14258	TRIM25	E3 ubiquitin/ISG15 ligase TRIM25 OS=Homo sapiens OX=9606 GN=TRIM25 PE=1 SV=2	25	14	29	14	630	70.9	8.09	343	98.1	106.5	104.1	91.9	98	101.4	102.9	97.1	-	1.05973	0.195578
Q8NFW8	CMAS	N-acylneuraminate cytidylyltransferase OS=Homo sapiens OX=9606 GN=CMAS PE=1 SV=2	34	16	38	16	434	48.3	7.93	371	101.1	105.6	101.9	99	95.9	96.4	102.867	97.1	-	1.05939	0.0267995
Q9Y6X3	MAU2	MAU2 chromatid cohesion factor homolog OS=Homo sapiens OX=9606 GN=MAU2 PE=1 SV=2	7	3	3	3	613	69	7.25	48	105.6	98.9	104.1	102.2	101.3	87.8	102.867	97.1	-	1.05939	0.31975
Q8N0X4	CLYBL	Citramalyl-CoA lyase, mitochondrial OS=Homo sapiens OX=9606 GN=CLYBL PE=1 SV=2	11	3	3	3	340	37.3	8.73	89	105.3	101.4	101.9	96.1	95.5	99.7	102.867	97.1	-	1.05939	0.0324935
O95159	ZFPL1	Zinc finger protein-like 1 OS=Homo sapiens OX=9606 GN=ZFPL1 PE=1 SV=2	25	6	10	6	310	34.1	8.07	50	98.2	107.4	103	94.9	99.9	96.5	102.867	97.1	-	1.05939	0.130539
Q5BVD1	TTMP	TPA-induced transmembrane protein OS=Homo sapiens OX=9606 GN=TTMP PE=1 SV=2	8	1	1	1	217	24.3	4.09	49	99.7	100.2	108.7	98.6	93.7	99	102.867	97.1	-	1.05939	0.163277
Q01831	XPC	DNA repair protein complementing XP-C cells OS=Homo sapiens OX=9606 GN=XPC PE=1 SV=4	5	6	8	6	940	105.9	8.9	0	101.4	103.7	103.5	93.3	98.5	99.5	102.867	97.1	-	1.05939	0.0486934
Q92667	AKAP1	A-kinase anchor protein 1, mitochondrial OS=Homo sapiens OX=9606 GN=AKAP1 PE=1 SV=1	13	10	13	10	903	97.3	4.94	97	103.1	107.2	98.4	95.3	98.3	97.8	102.9	97.1333	-	1.05937	0.100121
O15118	NPC1	NPC intracellular cholesterol transporter 1 OS=Homo sapiens OX=9606 GN=NPC1 PE=1 SV=2	9	11	23	11	1278	142.1	5.36	161	99.5	102	107.2	97.4	97.1	96.9	102.9	97.1333	-	1.05937	0.0641483
Q5JTJ3	COA6	Cytochrome c oxidase assembly factor 6 homolog OS=Homo sapiens OX=9606 GN=COA6 PE=1 SV=1	23	3	5	3	125	14.1	8.25	113	94.9	108.5	105.3	95	95.7	100.7	102.9	97.1333	-	1.05937	0.267499
Q96BK5	PINX1	PIN2/TERF1-interacting telomerase inhibitor 1 OS=Homo sapiens OX=9606 GN=PINX1 PE=1 SV=2	21	6	10	6	328	37	9.6	51	102.5	104.5	101.7	99.4	96.1	95.9	102.9	97.1333	-	1.05937	0.014889
Q9P0U3	SENP1	Sentrin-specific protease 1 OS=Homo sapiens OX=9606 GN=SENP1 PE=1 SV=2	7	4	5	4	644	73.4	8.47	22	104.6	102.1	102	98.7	96.2	96.5	102.9	97.1333	-	1.05937	0.00763302
P84243	H3-3A	Histone H3.3 OS=Homo sapiens OX=9606 GN=H3-3A PE=1 SV=2	32	7	62	2	136	15.3	11.27	477	104.7	102.8	101.1	106.3	93.2	91.9	102.867	97.1333	-	1.05903	0.290823
Q86T03	PIP4P1	Type 1 phosphatidylinositol 4,5-bisphosphate 4-phosphatase OS=Homo sapiens OX=9606 GN=PIP4P1 PE=1 SV=1	8	2	2	1	277	29.5	8.91	39	105.4	99.7	103.5	100.3	92.3	98.8	102.867	97.1333	-	1.05903	0.125987
Q8IZL8	PELP1	Proline-, glutamic acid- and leucine-rich protein 1 OS=Homo sapiens OX=9606 GN=PELP1 PE=1 SV=2	18	13	24	13	1130	119.6	4.34	289	104.2	103.6	100.8	97.1	96.4	97.9	102.867	97.1333	-	1.05903	0.00719749
P35249	RFC4	Replication factor C subunit 4 OS=Homo sapiens OX=9606 GN=RFC4 PE=1 SV=2	32	9	12	9	363	39.7	8.02	205	106	103.6	99	98.3	96.7	96.4	102.867	97.1333	-	1.05903	0.0550427
Q9BY49	PECR	Peroxisomal trans-2-enoyl-CoA reductase OS=Homo sapiens OX=9606 GN=PECR PE=1 SV=2	17	5	11	5	303	32.5	8.81	86	104	102.6	102	100.7	97	93.7	102.867	97.1333	-	1.05903	0.052918
Q8NAF0	ZNF579	Zinc finger protein 579 OS=Homo sapiens OX=9606 GN=ZNF579 PE=1 SV=2	3	2	2	2	562	60.5	8.69	32	102.5	104.3	101.8	98.2	96.5	96.7	102.867	97.1333	-	1.05903	0.00334664
P10909	CLU	Clusterin OS=Homo sapiens OX=9606 GN=CLU PE=1 SV=1	16	7	17	7	449	52.5	6.27	200	113.9	98.5	96.2	101.1	94.8	95.5	102.867	97.1333	-	1.05903	0.38644
Q92522	H1FX	Histone H1x OS=Homo sapiens OX=9606 GN=H1FX PE=1 SV=1	31	5	15	5	213	22.5	10.76	287	97.9	108.1	102.6	98.7	95.9	96.8	102.867	97.1333	-	1.05903	0.134347
Q15041	ARL6IP1	ADP-ribosylation factor-like protein 6-interacting protein 1 OS=Homo sapiens OX=9606 GN=ARL6IP1 PE=1 SV=2	9	2	8	2	203	23.3	9.32	36	92.7	87.8	128.1	99.7	96.9	94.8	102.867	97.1333	-	1.05903	0.676816
Q13243	SRSF5	Serine/arginine-rich splicing factor 5 OS=Homo sapiens OX=9606 GN=SRSF5 PE=1 SV=1	28	7	25	6	272	31.2	11.59	343	100.6	104.3	103.7	95.6	99.7	96.1	102.867	97.1333	-	1.05903	0.0293787
P15529	CD46	Membrane cofactor protein OS=Homo sapiens OX=9606 GN=CD46 PE=1 SV=3	13	5	8	5	392	43.7	6.74	22	106	98.7	103.8	97	90.6	103.8	102.833	97.1333	-	1.05868	0.263179
O00400	SLC33A1	Acetyl-coenzyme A transporter 1 OS=Homo sapiens OX=9606 GN=SLC33A1 PE=1 SV=1	12	7	16	7	549	60.9	7.33	280	103.7	105.5	99.3	100.2	95.1	96.1	102.833	97.1333	-	1.05868	0.0775276
P68400	CSNK2A1	Casein kinase II subunit alpha OS=Homo sapiens OX=9606 GN=CSNK2A1 PE=1 SV=1	31	11	29	11	391	45.1	7.74	380	100.6	101.5	106.5	97.8	96.4	97.3	102.867	97.1667	-	1.05866	0.0387266
Q75N03	CBLL1	E3 ubiquitin-protein ligase Hakai OS=Homo sapiens OX=9606 GN=CBLL1 PE=1 SV=1	3	2	3	2	491	54.5	8.29	34	100.1	103.8	104.7	97.7	96.5	97.3	102.867	97.1667	-	1.05866	0.0171292
Q29980	MICB	MHC class I polypeptide-related sequence B OS=Homo sapiens OX=9606 GN=MICB PE=1 SV=1	6	1	2	1	383	42.6	6.98	36	102.1	103.3	103	93.6	88.1	109.7	102.8	97.1333	-	1.05834	0.431926
Q9BVC5	C2orf49	Ashwin OS=Homo sapiens OX=9606 GN=C2orf49 PE=1 SV=1	11	2	3	2	232	25.8	9.74	37	106.5	97.6	104.4	103.7	94.9	92.9	102.833	97.1667	-	1.05832	0.255009
Q9NX40	OCIAD1	OCIA domain-containing protein 1 OS=Homo sapiens OX=9606 GN=OCIAD1 PE=1 SV=1	30	9	33	9	245	27.6	7.49	498	103.4	105.1	100	97.8	96.6	97.1	102.833	97.1667	-	1.05832	0.0211712
Q13085	ACACA	Acetyl-CoA carboxylase 1 OS=Homo sapiens OX=9606 GN=ACACA PE=1 SV=2	0	1	1	1	2346	265.4	6.37	0	110	98.8	99.7	93.9	96.2	101.4	102.833	97.1667	-	1.05832	0.250697
P21675	TAF1	Transcription initiation factor TFIID subunit 1 OS=Homo sapiens OX=9606 GN=TAF1 PE=1 SV=2	1	2	2	2	1872	212.5	5.07	31	105.8	98.6	104.1	99	94.8	97.7	102.833	97.1667	-	1.05832	0.0862547
P33993	MCM7	DNA replication licensing factor MCM7 OS=Homo sapiens OX=9606 GN=MCM7 PE=1 SV=4	27	17	27	17	719	81.3	6.46	209	100.4	104.5	103.5	92.1	99.5	99.9	102.8	97.1667	-	1.05798	0.116465
Q92600	CNOT9	CCR4-NOT transcription complex subunit 9 OS=Homo sapiens OX=9606 GN=CNOT9 PE=1 SV=1	12	3	4	3	299	33.6	8.03	60	103.6	99.5	105.3	94.8	97.7	99	102.8	97.1667	-	1.05798	0.0567285
P07339	CTSD	Cathepsin D OS=Homo sapiens OX=9606 GN=CTSD PE=1 SV=1	38	13	78	13	412	44.5	6.54	1401	112.2	100	96.2	103.9	93.3	94.3	102.8	97.1667	-	1.05798	0.393137
Q9H3Z4	DNAJC5	DnaJ homolog subfamily C member 5 OS=Homo sapiens OX=9606 GN=DNAJC5 PE=1 SV=1	19	3	6	3	198	22.1	5.07	80	102.5	99.4	106.5	97.5	99.3	94.7	102.8	97.1667	-	1.05798	0.08321
O43824	GTPBP6	Putative GTP-binding protein 6 OS=Homo sapiens OX=9606 GN=GTPBP6 PE=2 SV=4	5	2	2	2	516	56.9	9.42	44	100.2	104.1	104.2	99.9	97.7	94	102.833	97.2	-	1.05796	0.0601065
Q8TBZ0	CCDC110	Coiled-coil domain-containing protein 110 OS=Homo sapiens OX=9606 GN=CCDC110 PE=1 SV=1	1	1	1	1	833	96.7	6.24	16	104.8	96.3	107.4	95	95.3	101.3	102.833	97.2	-	1.05796	0.225026
Q6NZY4	ZCCHC8	Zinc finger CCHC domain-containing protein 8 OS=Homo sapiens OX=9606 GN=ZCCHC8 PE=1 SV=2	24	13	19	13	707	78.5	4.87	341	105.2	101.7	101.5	98.6	94.3	98.7	102.8	97.2	-	1.05761	0.0409991
Q86XK2	FBXO11	F-box only protein 11 OS=Homo sapiens OX=9606 GN=FBXO11 PE=1 SV=3	5	5	6	5	927	103.5	6.99	19	103.9	102.9	101.6	99.4	94.9	97.3	102.8	97.2	-	1.05761	0.0185536
Q9P031	CCDC59	Thyroid transcription factor 1-associated protein 26 OS=Homo sapiens OX=9606 GN=CCDC59 PE=1 SV=2	8	2	2	2	241	28.7	9.88	30	95.3	108	105.1	97.7	98	95.9	102.8	97.2	-	1.05761	0.224164
Q15022	SUZ12	Polycomb protein SUZ12 OS=Homo sapiens OX=9606 GN=SUZ12 PE=1 SV=3	5	3	6	3	739	83	8.81	97	103.9	103	101.5	97.7	96.3	97.6	102.8	97.2	-	1.05761	0.00254587
Q969X1	TMBIM1	Protein lifeguard 3 OS=Homo sapiens OX=9606 GN=TMBIM1 PE=1 SV=2	5	2	6	2	311	34.6	7.72	146	101.3	103.9	103.2	99.1	98.5	94	102.8	97.2	-	1.05761	0.0350579
Q5VWQ0	RSBN1	Lysine-specific demethylase 9 OS=Homo sapiens OX=9606 GN=RSBN1 PE=1 SV=2	1	1	1	1	802	90	8.6	34	102.4	100.5	105.5	99	97.9	94.7	102.8	97.2	-	1.05761	0.0451132
Q9UHG3	PCYOX1	Prenylcysteine oxidase 1 OS=Homo sapiens OX=9606 GN=PCYOX1 PE=1 SV=3	30	13	28	13	505	56.6	6.18	405	105.2	101.8	101.4	96.8	97	97.8	102.8	97.2	-	1.05761	0.0107988
P85037	FOXK1	Forkhead box protein K1 OS=Homo sapiens OX=9606 GN=FOXK1 PE=1 SV=1	9	8	11	7	733	75.4	9.32	22	103.5	100.8	104.1	100.8	94.5	96.3	102.8	97.2	-	1.05761	0.0582954
Q9NQZ2	UTP3	Something about silencing protein 10 OS=Homo sapiens OX=9606 GN=UTP3 PE=1 SV=1	11	5	14	5	479	54.5	5.62	106	101.3	105.1	102	96.4	95.7	99.5	102.8	97.2	-	1.05761	0.0274958
P49754	VPS41	Vacuolar protein sorting-associated protein 41 homolog OS=Homo sapiens OX=9606 GN=VPS41 PE=1 SV=3	2	2	2	2	854	98.5	5.85	27	101.7	104.1	102.6	100.5	98.6	92.5	102.8	97.2	-	1.05761	0.0897368
O75323	NIPSNAP2	Protein NipSnap homolog 2 OS=Homo sapiens OX=9606 GN=NIPSNAP2 PE=1 SV=1	28	10	16	8	286	33.7	9.36	46	104.2	103.4	100.7	101.1	94.6	95.9	102.767	97.2	-	1.05727	0.068681
Q53F19	NCBP3	Nuclear cap-binding protein subunit 3 OS=Homo sapiens OX=9606 GN=NCBP3 PE=1 SV=2	18	10	19	10	620	70.5	5.73	355	101	104.7	102.6	97.8	96.7	97.1	102.767	97.2	-	1.05727	0.0076148
Q8WTT2	NOC3L	Nucleolar complex protein 3 homolog OS=Homo sapiens OX=9606 GN=NOC3L PE=1 SV=1	16	13	24	13	800	92.5	9.17	266	99.9	105.2	103.3	96.9	98.1	96.7	102.8	97.2333	-	1.05725	0.0259123
P78332	RBM6	RNA-binding protein 6 OS=Homo sapiens OX=9606 GN=RBM6 PE=1 SV=5	16	18	22	17	1123	128.6	6.32	196	99.9	106.7	101.8	98.5	96.9	96.3	102.8	97.2333	-	1.05725	0.0591605
P29728	OAS2	2'-5'-oligoadenylate synthase 2 OS=Homo sapiens OX=9606 GN=OAS2 PE=1 SV=3	2	1	2	1	719	82.4	8.25	0	105.8	103.3	99.3	93.5	96.1	102.1	102.8	97.2333	-	1.05725	0.154222
O75818	RPP40	Ribonuclease P protein subunit p40 OS=Homo sapiens OX=9606 GN=RPP40 PE=1 SV=3	8	2	3	2	363	41.8	6.67	52	107.7	96	104.7	92.6	100.9	98.2	102.8	97.2333	-	1.05725	0.262883
Q8N697	SLC15A4	Solute carrier family 15 member 4 OS=Homo sapiens OX=9606 GN=SLC15A4 PE=1 SV=1	6	4	5	4	577	62	9	82	104	96.8	107.6	99.2	96.3	96.2	102.8	97.2333	-	1.05725	0.169289
P33121	ACSL1	Long-chain-fatty-acid--CoA ligase 1 OS=Homo sapiens OX=9606 GN=ACSL1 PE=1 SV=1	11	7	14	7	698	77.9	7.15	115	103.9	99.5	105	96.7	96.2	98.8	102.8	97.2333	-	1.05725	0.0401942
Q13356	PPIL2	RING-type E3 ubiquitin-protein ligase PPIL2 OS=Homo sapiens OX=9606 GN=PPIL2 PE=1 SV=1	4	2	2	2	520	58.8	8.78	35	102.3	104.2	101.7	93.7	102.6	95.3	102.733	97.2	-	1.05693	0.123284
Q02952	AKAP12	A-kinase anchor protein 12 OS=Homo sapiens OX=9606 GN=AKAP12 PE=1 SV=4	21	32	54	32	1782	191.4	4.41	690	107.8	104.1	96.4	97.1	97.3	97.3	102.767	97.2333	-	1.05691	0.174779
Q5T5X7	BEND3	BEN domain-containing protein 3 OS=Homo sapiens OX=9606 GN=BEND3 PE=1 SV=1	4	3	4	3	828	94.4	5.43	40	106.2	98.3	103.8	95.9	95.6	100.2	102.767	97.2333	-	1.05691	0.116482
O14656	TOR1A	Torsin-1A OS=Homo sapiens OX=9606 GN=TOR1A PE=1 SV=1	14	4	7	4	332	37.8	6.99	99	106.4	98.5	103.4	96.1	96.3	99.3	102.767	97.2333	-	1.05691	0.0934827
Q9GZS1	POLR1E	DNA-directed RNA polymerase I subunit RPA49 OS=Homo sapiens OX=9606 GN=POLR1E PE=1 SV=3	23	10	18	10	419	47.2	8.94	121	96.6	98.5	113.2	96.1	98	97.6	102.767	97.2333	-	1.05691	0.353566
Q9P0S9	TMEM14C	Transmembrane protein 14C OS=Homo sapiens OX=9606 GN=TMEM14C PE=1 SV=1	9	1	2	1	112	11.6	9.88	25	100.6	99.9	107.8	95.5	98.4	97.8	102.767	97.2333	-	1.05691	0.107407
P18615	NELFE	Negative elongation factor E OS=Homo sapiens OX=9606 GN=NELFE PE=1 SV=3	20	5	7	5	380	43.2	9.33	74	103.8	93.3	111.2	102.2	88.5	101.1	102.767	97.2667	-	1.05655	0.464168
P40937	RFC5	Replication factor C subunit 5 OS=Homo sapiens OX=9606 GN=RFC5 PE=1 SV=1	2	1	1	1	340	38.5	7.2	24	102.2	106	100.1	98.2	97.3	96.3	102.767	97.2667	-	1.05655	0.0385591
Q9Y2G8	DNAJC16	DnaJ homolog subfamily C member 16 OS=Homo sapiens OX=9606 GN=DNAJC16 PE=2 SV=3	11	7	8	7	782	90.5	7.12	106	100.7	102.6	104.8	99	96	96.7	102.7	97.2333	-	1.05622	0.0214794
Q8N0T1	RBIS	Ribosomal biogenesis factor OS=Homo sapiens OX=9606 GN=RBIS PE=1 SV=4	16	2	5	2	100	11.4	10.46	56	97.4	100.2	110.6	97.7	95	99.1	102.733	97.2667	-	1.0562	0.262182
Q9NUL3	STAU2	Double-stranded RNA-binding protein Staufen homolog 2 OS=Homo sapiens OX=9606 GN=STAU2 PE=1 SV=2	11	7	12	5	570	62.6	9.61	76	98.1	109.7	100.4	98.1	99.1	94.6	102.733	97.2667	-	1.0562	0.2236
P38432	COIL	Coilin OS=Homo sapiens OX=9606 GN=COIL PE=1 SV=1	12	6	12	6	576	62.6	9.07	89	95.4	103.6	109.2	96.2	99.9	95.7	102.733	97.2667	-	1.0562	0.264923
Q9UIQ6	LNPEP	Leucyl-cystinyl aminopeptidase OS=Homo sapiens OX=9606 GN=LNPEP PE=1 SV=3	20	17	31	17	1025	117.3	5.73	560	103.8	102.5	101.9	95.9	96.7	99.2	102.733	97.2667	-	1.0562	0.00870843
Q86YQ8	CPNE8	Copine-8 OS=Homo sapiens OX=9606 GN=CPNE8 PE=1 SV=2	20	9	20	8	564	63.1	5.96	197	101.9	101.9	104.3	98.3	95.7	97.8	102.7	97.2667	-	1.05586	0.00856726
Q9ULV4	CORO1C	Coronin-1C OS=Homo sapiens OX=9606 GN=CORO1C PE=1 SV=1	31	17	56	17	474	53.2	7.08	432	104.1	103.5	100.5	97	96.5	98.3	102.7	97.2667	-	1.05586	0.0117296
Q9NPE2	NGRN	Neugrin OS=Homo sapiens OX=9606 GN=NGRN PE=1 SV=2	27	6	9	6	291	32.4	9.1	135	103.4	103.8	100.9	101	93.8	97	102.7	97.2667	-	1.05586	0.0750345
Q5JTV8	TOR1AIP1	Torsin-1A-interacting protein 1 OS=Homo sapiens OX=9606 GN=TOR1AIP1 PE=1 SV=2	29	15	54	14	583	66.2	8.18	696	105.7	104.1	98.3	99.8	95.8	96.2	102.7	97.2667	-	1.05586	0.103231
Q15814	TBCC	Tubulin-specific chaperone C OS=Homo sapiens OX=9606 GN=TBCC PE=1 SV=2	8	2	2	2	346	39.2	5.71	18	102	76	130.2	90.8	93.6	107.5	102.733	97.3	-	1.05584	0.758179
O60337	MARCH6	E3 ubiquitin-protein ligase MARCH6 OS=Homo sapiens OX=9606 GN=MARCH6 PE=1 SV=2	1	1	1	1	910	102.5	6.28	0	107.1	101.9	99.2	95.8	99.5	96.6	102.733	97.3	-	1.05584	0.102618
A3KMH1	VWA8	von Willebrand factor A domain-containing protein 8 OS=Homo sapiens OX=9606 GN=VWA8 PE=1 SV=2	16	27	37	27	1905	214.7	7.4	264	103.9	99.6	104.6	96.6	98.2	97.1	102.7	97.3	-	1.0555	0.0297431
P57088	TMEM33	Transmembrane protein 33 OS=Homo sapiens OX=9606 GN=TMEM33 PE=1 SV=2	26	6	16	6	247	28	9.7	134	102.2	105.7	100.2	97.9	96.6	97.4	102.7	97.3	-	1.0555	0.0307826
Q96B77	TMEM186	Transmembrane protein 186 OS=Homo sapiens OX=9606 GN=TMEM186 PE=2 SV=1	8	1	1	1	213	24.9	9.86	22	102.1	100.4	105.6	97.6	101.1	93.2	102.7	97.3	-	1.0555	0.121124
P19388	POLR2E	DNA-directed RNA polymerases I, II, and III subunit RPABC1 OS=Homo sapiens OX=9606 GN=POLR2E PE=1 SV=4	36	7	11	7	210	24.5	5.95	179	102.4	101.5	104.2	98.5	96.6	96.8	102.7	97.3	-	1.0555	0.00562414
O14494	PLPP1	Phospholipid phosphatase 1 OS=Homo sapiens OX=9606 GN=PLPP1 PE=1 SV=1	12	3	5	3	284	32.1	7.97	84	103.9	98.7	105.5	100.5	95.8	95.6	102.7	97.3	-	1.0555	0.106701
Q9NY93	DDX56	Probable ATP-dependent RNA helicase DDX56 OS=Homo sapiens OX=9606 GN=DDX56 PE=1 SV=1	27	15	31	15	547	61.6	9.26	248	100.8	105.1	102.1	97.2	98.1	96.6	102.667	97.3	-	1.05516	0.0162949
Q96QD9	FYTTD1	UAP56-interacting factor OS=Homo sapiens OX=9606 GN=FYTTD1 PE=1 SV=3	28	8	16	8	318	35.8	11.78	104	105	102.7	100.3	99.6	96.4	95.9	102.667	97.3	-	1.05516	0.0396527
O43298	ZBTB43	Zinc finger and BTB domain-containing protein 43 OS=Homo sapiens OX=9606 GN=ZBTB43 PE=1 SV=1	3	1	1	1	467	52.6	5.76	0	95.6	104.9	107.5	94.9	97.4	99.6	102.667	97.3	-	1.05516	0.236682
O75976	CPD	Carboxypeptidase D OS=Homo sapiens OX=9606 GN=CPD PE=1 SV=2	22	28	72	28	1380	152.8	6.05	664	103.8	102.5	101.8	100.4	95.9	95.7	102.7	97.3333	-	1.05514	0.0308648
Q13232	NME3	Nucleoside diphosphate kinase 3 OS=Homo sapiens OX=9606 GN=NME3 PE=1 SV=2	27	4	8	3	169	19	7.84	31	114.8	94.9	98.4	98.5	99.4	94.1	102.7	97.3333	-	1.05514	0.445525
O75569	PRKRA	Interferon-inducible double-stranded RNA-dependent protein kinase activator A OS=Homo sapiens OX=9606 GN=PRKRA PE=1 SV=1	22	6	9	6	313	34.4	8.41	44	107.6	100.2	100.3	96.2	94.8	101	102.7	97.3333	-	1.05514	0.157088
Q7Z6E9	RBBP6	E3 ubiquitin-protein ligase RBBP6 OS=Homo sapiens OX=9606 GN=RBBP6 PE=1 SV=1	5	7	10	7	1792	201.4	9.64	21	101.8	102.4	103.9	94.2	99.6	98.2	102.7	97.3333	-	1.05514	0.0364171
P32189	GK	Glycerol kinase OS=Homo sapiens OX=9606 GN=GK PE=1 SV=3	6	3	4	3	559	61.2	6.54	37	100.8	100.9	106.4	98.9	93.1	100	102.7	97.3333	-	1.05514	0.130709
O60437	PPL	Periplakin OS=Homo sapiens OX=9606 GN=PPL PE=1 SV=4	43	77	166	77	1756	204.6	5.6	1751	102.6	104.8	100.7	96.5	97.4	98.1	102.7	97.3333	-	1.05514	0.0134847
Q9HC21	SLC25A19	Mitochondrial thiamine pyrophosphate carrier OS=Homo sapiens OX=9606 GN=SLC25A19 PE=1 SV=1	12	4	10	4	320	35.5	9.55	108	100.3	103.2	104.5	95.7	98	98.3	102.667	97.3333	-	1.05479	0.0231039
Q15637	SF1	Splicing factor 1 OS=Homo sapiens OX=9606 GN=SF1 PE=1 SV=4	19	10	23	10	639	68.3	8.98	224	104.5	105	98.5	98.9	95	98.1	102.667	97.3333	-	1.05479	0.0906901
Q16739	UGCG	Ceramide glucosyltransferase OS=Homo sapiens OX=9606 GN=UGCG PE=1 SV=1	3	1	1	1	394	44.8	7.78	21	105.1	98.8	104.1	89.9	100.6	101.5	102.667	97.3333	-	1.05479	0.273706
Q9Y3B3	TMED7	Transmembrane emp24 domain-containing protein 7 OS=Homo sapiens OX=9606 GN=TMED7 PE=1 SV=2	18	4	16	4	224	25.2	6.89	335	105.3	104.3	98.4	97.9	96.4	97.7	102.667	97.3333	-	1.05479	0.072735
Q9Y2E4	DIP2C	Disco-interacting protein 2 homolog C OS=Homo sapiens OX=9606 GN=DIP2C PE=1 SV=2	1	1	1	1	1556	170.7	7.39	0	105.3	97.4	105.3	97.1	98	96.9	102.667	97.3333	-	1.05479	0.114955
Q9NUJ1	ABHD10	Mycophenolic acid acyl-glucuronide esterase, mitochondrial OS=Homo sapiens OX=9606 GN=ABHD10 PE=1 SV=1	29	7	27	7	306	33.9	8.57	466	105.5	100.6	101.9	98.9	97.1	96	102.667	97.3333	-	1.05479	0.0344331
P19404	NDUFV2	NADH dehydrogenase [ubiquinone] flavoprotein 2, mitochondrial OS=Homo sapiens OX=9606 GN=NDUFV2 PE=1 SV=2	41	10	36	10	249	27.4	8.06	277	104.7	105.3	98	95.9	97.3	98.8	102.667	97.3333	-	1.05479	0.0984055
Q86VP1	TAX1BP1	Tax1-binding protein 1 OS=Homo sapiens OX=9606 GN=TAX1BP1 PE=1 SV=2	15	13	17	13	789	90.8	5.43	88	99.4	103.8	104.7	95.9	98.3	97.8	102.633	97.3333	-	1.05445	0.0417358
Q6ZMP0	THSD4	Thrombospondin type-1 domain-containing protein 4 OS=Homo sapiens OX=9606 GN=THSD4 PE=2 SV=2	4	3	3	3	1018	112.4	7.65	23	111.1	94.7	102.1	99.3	99.4	93.3	102.633	97.3333	-	1.05445	0.361818
Q9NYB9	ABI2	Abl interactor 2 OS=Homo sapiens OX=9606 GN=ABI2 PE=1 SV=1	6	3	6	1	513	55.6	6.16	64	100.9	107.8	99.3	88.8	102.7	100.6	102.667	97.3667	-	1.05443	0.353279
Q9NS86	LANCL2	LanC-like protein 2 OS=Homo sapiens OX=9606 GN=LANCL2 PE=1 SV=1	8	3	5	3	450	50.8	7.43	59	101.7	98.8	107.5	92	100.1	100	102.667	97.3667	-	1.05443	0.226021
O00268	TAF4	Transcription initiation factor TFIID subunit 4 OS=Homo sapiens OX=9606 GN=TAF4 PE=1 SV=2	9	8	10	8	1085	110	9.94	79	101	101.6	105.4	94.5	96.6	101	102.667	97.3667	-	1.05443	0.087978
Q9H2D1	SLC25A32	Mitochondrial folate transporter/carrier OS=Homo sapiens OX=9606 GN=SLC25A32 PE=1 SV=2	9	3	6	3	315	35.4	9.45	25	103.3	107.1	97.6	100.1	96.6	95.4	102.667	97.3667	-	1.05443	0.162483
Q9H6T3	RPAP3	RNA polymerase II-associated protein 3 OS=Homo sapiens OX=9606 GN=RPAP3 PE=1 SV=2	12	6	6	6	665	75.7	6.84	59	102.6	101.3	104.1	94.2	98.6	99.3	102.667	97.3667	-	1.05443	0.0414818
P11021	HSPA5	Endoplasmic reticulum chaperone BiP OS=Homo sapiens OX=9606 GN=HSPA5 PE=1 SV=2	56	38	346	35	654	72.3	5.16	5757	109.1	101.1	97.7	103.6	94.3	94.2	102.633	97.3667	-	1.05409	0.315812
Q9H6R0	DHX33	ATP-dependent RNA helicase DHX33 OS=Homo sapiens OX=9606 GN=DHX33 PE=1 SV=2	8	6	8	6	707	78.8	8.91	37	102	104.3	101.6	99.2	97.2	95.7	102.633	97.3667	-	1.05409	0.0161602
O75525	KHDRBS3	KH domain-containing, RNA-binding, signal transduction-associated protein 3 OS=Homo sapiens OX=9606 GN=KHDRBS3 PE=1 SV=1	7	3	14	2	346	38.8	7.61	91	99.6	102.9	105.4	97.3	97.9	96.9	102.633	97.3667	-	1.05409	0.0365837
Q8IYS2	KIAA2013	Uncharacterized protein KIAA2013 OS=Homo sapiens OX=9606 GN=KIAA2013 PE=1 SV=1	6	4	9	4	634	69.1	8.19	75	104.1	101.2	102.6	97.4	95.7	99	102.633	97.3667	-	1.05409	0.0142355
P55809	OXCT1	Succinyl-CoA:3-ketoacid coenzyme A transferase 1, mitochondrial OS=Homo sapiens OX=9606 GN=OXCT1 PE=1 SV=1	29	13	46	13	520	56.1	7.46	851	104.5	103.4	100	99	96.9	96.2	102.633	97.3667	-	1.05409	0.029845
Q14240	EIF4A2	Eukaryotic initiation factor 4A-II OS=Homo sapiens OX=9606 GN=EIF4A2 PE=1 SV=2	31	13	45	3	407	46.4	5.48	604	103	98.8	106.1	97.3	98.4	96.4	102.633	97.3667	-	1.05409	0.0742217
Q9NRX2	MRPL17	39S ribosomal protein L17, mitochondrial OS=Homo sapiens OX=9606 GN=MRPL17 PE=1 SV=1	28	6	13	6	175	20	10.11	62	100.8	104.2	102.9	101	96.4	94.7	102.633	97.3667	-	1.05409	0.0684586
Q7L2J0	MEPCE	7SK snRNA methylphosphate capping enzyme OS=Homo sapiens OX=9606 GN=MEPCE PE=1 SV=1	4	2	2	2	689	74.3	9.57	32	108.6	96.7	102.5	94.1	96.3	101.7	102.6	97.3667	-	1.05375	0.27198
Q9H1B5	XYLT2	Xylosyltransferase 2 OS=Homo sapiens OX=9606 GN=XYLT2 PE=1 SV=2	2	1	1	1	865	96.7	8.22	45	98.1	99.2	110.5	99.5	95.4	97.2	102.6	97.3667	-	1.05375	0.274502
O75431	MTX2	Metaxin-2 OS=Homo sapiens OX=9606 GN=MTX2 PE=1 SV=1	24	6	13	6	263	29.7	6.29	242	102	103.1	102.7	98.1	95.6	98.4	102.6	97.3667	-	1.05375	0.00517745
Q9Y3C6	PPIL1	Peptidyl-prolyl cis-trans isomerase-like 1 OS=Homo sapiens OX=9606 GN=PPIL1 PE=1 SV=1	27	4	10	4	166	18.2	7.99	108	102.7	100.9	104.2	96.5	96.2	99.4	102.6	97.3667	-	1.05375	0.020006
Q68D91	MBLAC2	Metallo-beta-lactamase domain-containing protein 2 OS=Homo sapiens OX=9606 GN=MBLAC2 PE=1 SV=3	24	5	6	5	279	31.4	6.92	163	104.7	99.9	103.3	99.2	93.7	99.3	102.633	97.4	-	1.05373	0.0885433
Q9P1U0	ZNRD1	DNA-directed RNA polymerase I subunit RPA12 OS=Homo sapiens OX=9606 GN=ZNRD1 PE=2 SV=1	13	1	1	1	126	13.9	5.06	44	104.8	108.8	94.2	98	98.9	95.3	102.6	97.4	-	1.05339	0.311074
Q8NEF9	SRFBP1	Serum response factor-binding protein 1 OS=Homo sapiens OX=9606 GN=SRFBP1 PE=1 SV=1	23	9	18	9	429	48.6	9.58	243	99.7	104.2	103.9	95.4	98.3	98.5	102.6	97.4	-	1.05339	0.0420918
O95197	RTN3	Reticulon-3 OS=Homo sapiens OX=9606 GN=RTN3 PE=1 SV=2	6	4	16	4	1032	112.5	4.96	127	101.7	98.8	107.3	99.8	97.2	95.2	102.6	97.4	-	1.05339	0.139783
Q96EX1	SMIM12	Small integral membrane protein 12 OS=Homo sapiens OX=9606 GN=SMIM12 PE=1 SV=3	29	4	5	4	92	10.8	8.44	36	111.6	98	98.2	101.1	97	94.1	102.6	97.4	-	1.05339	0.351659
P49790	NUP153	Nuclear pore complex protein Nup153 OS=Homo sapiens OX=9606 GN=NUP153 PE=1 SV=2	17	20	33	20	1475	153.8	8.73	259	99.2	103.8	104.8	97.4	96.1	98.7	102.6	97.4	-	1.05339	0.0505859
P17152	TMEM11	Transmembrane protein 11, mitochondrial OS=Homo sapiens OX=9606 GN=TMEM11 PE=1 SV=1	20	4	8	4	192	21.5	7.36	95	103.4	106	98.4	98.2	98.4	95.6	102.6	97.4	-	1.05339	0.0967081
Q9Y2U8	LEMD3	Inner nuclear membrane protein Man1 OS=Homo sapiens OX=9606 GN=LEMD3 PE=1 SV=2	29	19	37	19	911	99.9	7.55	1032	101.2	106	100.6	98.2	96.3	97.7	102.6	97.4	-	1.05339	0.0446793
O43678	NDUFA2	NADH dehydrogenase [ubiquinone] 1 alpha subcomplex subunit 2 OS=Homo sapiens OX=9606 GN=NDUFA2 PE=1 SV=3	49	5	12	5	99	10.9	9.57	220	105.6	105.3	96.9	97.3	95.7	99.2	102.6	97.4	-	1.05339	0.160784
P62861	FAU	40S ribosomal protein S30 OS=Homo sapiens OX=9606 GN=FAU PE=1 SV=1	17	1	2	1	59	6.6	12.15	62	97	105.7	105.1	99.1	95.1	98	102.6	97.4	-	1.05339	0.16325
Q15833	STXBP2	Syntaxin-binding protein 2 OS=Homo sapiens OX=9606 GN=STXBP2 PE=1 SV=2	18	9	10	9	593	66.4	6.55	57	92.6	107.2	108	94.6	98.7	98.9	102.6	97.4	-	1.05339	0.373716
Q05519	SRSF11	Serine/arginine-rich splicing factor 11 OS=Homo sapiens OX=9606 GN=SRSF11 PE=1 SV=1	15	6	21	6	484	53.5	10.52	379	98.4	99.3	110.1	96.6	97.1	98.5	102.6	97.4	-	1.05339	0.243185
P61289	PSME3	Proteasome activator complex subunit 3 OS=Homo sapiens OX=9606 GN=PSME3 PE=1 SV=1	19	5	10	5	254	29.5	5.95	121	100.3	98.8	108.7	98.1	94.2	99.9	102.6	97.4	-	1.05339	0.2126
Q9Y5Q0	FADS3	Fatty acid desaturase 3 OS=Homo sapiens OX=9606 GN=FADS3 PE=1 SV=1	12	4	7	4	445	51.1	7.77	60	104.6	106.1	97	99.7	96.5	96	102.567	97.4	-	1.05305	0.16508
Q2NL82	TSR1	Pre-rRNA-processing protein TSR1 homolog OS=Homo sapiens OX=9606 GN=TSR1 PE=1 SV=1	16	12	19	12	804	91.8	7.42	185	101.9	105.6	100.2	95.5	98.7	98	102.567	97.4	-	1.05305	0.0504416
Q13136	PPFIA1	Liprin-alpha-1 OS=Homo sapiens OX=9606 GN=PPFIA1 PE=1 SV=1	9	9	9	9	1202	135.7	6.29	149	102.5	101.8	103.4	98.8	96.1	97.3	102.567	97.4	-	1.05305	0.00471101
Q96E52	OMA1	Metalloendopeptidase OMA1, mitochondrial OS=Homo sapiens OX=9606 GN=OMA1 PE=1 SV=1	6	3	6	3	524	60.1	9.25	34	105.7	102.6	99.4	101.6	96.8	93.8	102.567	97.4	-	1.05305	0.150468
P34059	GALNS	N-acetylgalactosamine-6-sulfatase OS=Homo sapiens OX=9606 GN=GALNS PE=1 SV=1	7	4	8	4	522	58	6.74	98	111.5	96.8	99.5	107.9	91.1	93.3	102.6	97.4333	-	1.05303	0.498105
Q9Y3P4	RHBDD3	Rhomboid domain-containing protein 3 OS=Homo sapiens OX=9606 GN=RHBDD3 PE=2 SV=1	3	1	1	1	386	40.5	6.58	45	114.2	101.8	91.8	103.6	95.8	92.9	102.6	97.4333	-	1.05303	0.513987
Q8WV60	PTCD2	Pentatricopeptide repeat-containing protein 2, mitochondrial OS=Homo sapiens OX=9606 GN=PTCD2 PE=1 SV=3	5	2	2	2	388	43.9	9.23	33	102.7	102.2	102.9	93.9	96.7	101.7	102.6	97.4333	-	1.05303	0.0871232
Q96HJ9	FMC1	Protein FMC1 homolog OS=Homo sapiens OX=9606 GN=FMC1 PE=1 SV=2	18	2	4	2	113	12.7	10.07	63	105.5	105.1	97.2	97.7	99	95.6	102.6	97.4333	-	1.05303	0.147082
Q12959	DLG1	Disks large homolog 1 OS=Homo sapiens OX=9606 GN=DLG1 PE=1 SV=2	10	8	14	8	904	100.4	5.76	97	102.1	101.2	104.4	99.5	96.6	96.2	102.567	97.4333	-	1.05269	0.0219658
O43684	BUB3	Mitotic checkpoint protein BUB3 OS=Homo sapiens OX=9606 GN=BUB3 PE=1 SV=1	31	9	26	9	328	37.1	6.84	416	100.4	103.1	104.2	96.1	99.4	96.8	102.567	97.4333	-	1.05269	0.0273282
Q9H269	VPS16	Vacuolar protein sorting-associated protein 16 homolog OS=Homo sapiens OX=9606 GN=VPS16 PE=1 SV=2	7	5	6	5	839	94.6	6.77	73	102.3	97.4	108	96.3	98.4	97.6	102.567	97.4333	-	1.05269	0.175622
Q16595	FXN	Frataxin, mitochondrial OS=Homo sapiens OX=9606 GN=FXN PE=1 SV=2	26	4	6	4	210	23.1	8.69	50	109.2	98.2	100.3	100.6	97	94.7	102.567	97.4333	-	1.05269	0.246382
P10619	CTSA	Lysosomal protective protein OS=Homo sapiens OX=9606 GN=CTSA PE=1 SV=2	15	7	18	7	480	54.4	6.61	289	115.7	95.6	96.4	107.2	93.7	91.4	102.567	97.4333	-	1.05269	0.565865
O15446	CD3EAP	DNA-directed RNA polymerase I subunit RPA34 OS=Homo sapiens OX=9606 GN=CD3EAP PE=1 SV=1	34	8	12	8	510	55	8.51	307	97.5	106.9	103.3	95.4	99	97.9	102.567	97.4333	-	1.05269	0.155527
O60783	MRPS14	28S ribosomal protein S14, mitochondrial OS=Homo sapiens OX=9606 GN=MRPS14 PE=1 SV=1	19	2	7	2	128	15.1	11.41	298	107.2	99.1	101.3	91.5	97.6	103.2	102.533	97.4333	-	1.05234	0.286933
P38919	EIF4A3	Eukaryotic initiation factor 4A-III OS=Homo sapiens OX=9606 GN=EIF4A3 PE=1 SV=4	30	15	59	12	411	46.8	6.73	685	102.7	105.4	99.5	97.8	96.7	97.8	102.533	97.4333	-	1.05234	0.0430718
Q9Y5S1	TRPV2	Transient receptor potential cation channel subfamily V member 2 OS=Homo sapiens OX=9606 GN=TRPV2 PE=1 SV=1	24	14	36	14	764	85.9	5.83	480	103.7	99.1	104.9	95.2	101.3	95.9	102.567	97.4667	-	1.05233	0.12293
O75781	PALM	Paralemmin-1 OS=Homo sapiens OX=9606 GN=PALM PE=1 SV=2	21	7	9	7	387	42.1	5	85	104.2	104.8	98.7	102.9	96.8	92.7	102.567	97.4667	-	1.05233	0.22337
Q14155	ARHGEF7	Rho guanine nucleotide exchange factor 7 OS=Homo sapiens OX=9606 GN=ARHGEF7 PE=1 SV=2	1	1	1	1	803	90	7.09	20	104.2	101	102.5	95.3	95.3	101.8	102.567	97.4667	-	1.05233	0.0963429
P21266	GSTM3	Glutathione S-transferase Mu 3 OS=Homo sapiens OX=9606 GN=GSTM3 PE=1 SV=3	4	1	1	1	225	26.5	5.54	0	104.5	101.1	102.1	95.7	96.4	100.3	102.567	97.4667	-	1.05233	0.0435545
Q53GS7	GLE1	Nucleoporin GLE1 OS=Homo sapiens OX=9606 GN=GLE1 PE=1 SV=2	9	6	9	6	698	79.8	7.43	102	102.1	100.6	104.8	96.7	96.3	99.3	102.5	97.4333	-	1.052	0.0306644
Q14807	KIF22	Kinesin-like protein KIF22 OS=Homo sapiens OX=9606 GN=KIF22 PE=1 SV=5	21	11	17	11	665	73.2	9.45	109	102.6	102	103	103	94.9	94.5	102.533	97.4667	-	1.05198	0.14292
Q13740	ALCAM	CD166 antigen OS=Homo sapiens OX=9606 GN=ALCAM PE=1 SV=2	14	8	18	8	583	65.1	6.25	278	103.7	101.2	102.7	99.2	96.6	96.6	102.533	97.4667	-	1.05198	0.0109874
O75356	ENTPD5	Ectonucleoside triphosphate diphosphohydrolase 5 OS=Homo sapiens OX=9606 GN=ENTPD5 PE=1 SV=1	7	2	2	2	428	47.5	6.33	36	104.4	102.5	100.7	99.8	98	94.6	102.533	97.4667	-	1.05198	0.0528954
Q8IV48	ERI1	3'-5' exoribonuclease 1 OS=Homo sapiens OX=9606 GN=ERI1 PE=1 SV=3	7	2	3	2	349	40	6.7	80	96.6	102.4	108.6	94.7	98.5	99.2	102.533	97.4667	-	1.05198	0.246563
Q96HY6	DDRGK1	DDRGK domain-containing protein 1 OS=Homo sapiens OX=9606 GN=DDRGK1 PE=1 SV=2	21	5	14	5	314	35.6	5.12	199	102.1	101.9	103.6	98.3	100.2	93.9	102.533	97.4667	-	1.05198	0.0594293
Q8IV08	PLD3	5'-3' exonuclease PLD3 OS=Homo sapiens OX=9606 GN=PLD3 PE=1 SV=1	12	6	10	6	490	54.7	6.47	79	106.5	94.6	106.5	109.9	90.5	92	102.533	97.4667	-	1.05198	0.530475
Q9H061	TMEM126A	Transmembrane protein 126A OS=Homo sapiens OX=9606 GN=TMEM126A PE=1 SV=1	34	7	21	7	195	21.5	9.26	204	100.9	106	100.7	100.6	95.4	96.4	102.533	97.4667	-	1.05198	0.0978123
Q8NBP0	TTC13	Tetratricopeptide repeat protein 13 OS=Homo sapiens OX=9606 GN=TTC13 PE=2 SV=3	5	4	4	4	860	96.8	7.01	24	107.9	102.6	97.1	98.7	95.3	98.4	102.533	97.4667	-	1.05198	0.199696
Q8WYH8	ING5	Inhibitor of growth protein 5 OS=Homo sapiens OX=9606 GN=ING5 PE=1 SV=1	3	1	1	1	240	27.7	7.61	44	102.2	96.4	109	99.1	91.4	101.9	102.533	97.4667	-	1.05198	0.351377
Q9H553	ALG2	Alpha-1,3/1,6-mannosyltransferase ALG2 OS=Homo sapiens OX=9606 GN=ALG2 PE=1 SV=1	9	4	7	4	416	47.1	7.05	123	100.7	101.7	105.2	96.2	96.3	99.9	102.533	97.4667	-	1.05198	0.0502571
Q5VT52	RPRD2	Regulation of nuclear pre-mRNA domain-containing protein 2 OS=Homo sapiens OX=9606 GN=RPRD2 PE=1 SV=1	4	6	7	6	1461	155.9	7.42	87	98.8	103.6	105.2	97.8	97.4	97.2	102.533	97.4667	-	1.05198	0.0585648
Q9H0V9	LMAN2L	VIP36-like protein OS=Homo sapiens OX=9606 GN=LMAN2L PE=1 SV=1	18	6	16	6	348	39.7	8.38	113	104	105.4	98.1	99.6	94.8	98	102.5	97.4667	-	1.05164	0.129763
O75146	HIP1R	Huntingtin-interacting protein 1-related protein OS=Homo sapiens OX=9606 GN=HIP1R PE=1 SV=2	10	11	15	9	1068	119.3	6.67	111	99.2	97.9	110.4	97.1	96.5	98.8	102.5	97.4667	-	1.05164	0.279487
P15586	GNS	N-acetylglucosamine-6-sulfatase OS=Homo sapiens OX=9606 GN=GNS PE=1 SV=3	15	8	26	8	552	62	8.31	191	109.9	97.9	99.8	105	91.8	95.7	102.533	97.5	-	1.05162	0.404328
Q9UQB8	BAIAP2	Brain-specific angiogenesis inhibitor 1-associated protein 2 OS=Homo sapiens OX=9606 GN=BAIAP2 PE=1 SV=1	21	10	17	10	552	60.8	8.9	209	99.8	102.1	105.7	97	96.9	98.6	102.533	97.5	-	1.05162	0.0492359
Q8TCT8	SPPL2A	Signal peptide peptidase-like 2A OS=Homo sapiens OX=9606 GN=SPPL2A PE=1 SV=2	3	2	3	2	520	58.1	8.32	30	104.3	101.4	101.8	98.3	98	96.2	102.5	97.5	-	1.05128	0.0111073
Q04837	SSBP1	Single-stranded DNA-binding protein, mitochondrial OS=Homo sapiens OX=9606 GN=SSBP1 PE=1 SV=1	48	7	43	7	148	17.2	9.6	593	100.8	106.5	100.2	100.4	95.6	96.5	102.5	97.5	-	1.05128	0.115055
P16219	ACADS	Short-chain specific acyl-CoA dehydrogenase, mitochondrial OS=Homo sapiens OX=9606 GN=ACADS PE=1 SV=1	16	6	15	6	412	44.3	7.99	220	106.5	101	100	98.8	96.8	96.9	102.5	97.5	-	1.05128	0.0780641
P12429	ANXA3	Annexin A3 OS=Homo sapiens OX=9606 GN=ANXA3 PE=1 SV=3	26	8	10	8	323	36.4	5.92	137	94.5	102.8	110.2	91.6	101.3	99.6	102.5	97.5	-	1.05128	0.409416
P60510	PPP4C	Serine/threonine-protein phosphatase 4 catalytic subunit OS=Homo sapiens OX=9606 GN=PPP4C PE=1 SV=1	19	4	7	3	307	35.1	5.06	93	100.9	98.7	107.9	98.3	94.2	100	102.5	97.5	-	1.05128	0.200368
Q9H4B0	OSGEPL1	Probable tRNA N6-adenosine threonylcarbamoyltransferase, mitochondrial OS=Homo sapiens OX=9606 GN=OSGEPL1 PE=2 SV=2	7	3	3	3	414	45.1	8.56	24	105.1	101.3	101.1	97	98.7	96.8	102.5	97.5	-	1.05128	0.0252031
P34931	HSPA1L	Heat shock 70 kDa protein 1-like OS=Homo sapiens OX=9606 GN=HSPA1L PE=1 SV=2	21	12	82	1	641	70.3	6.02	1212	105.4	99.8	102.3	99.6	93.5	99.4	102.5	97.5	-	1.05128	0.124045
Q96A49	SYAP1	Synapse-associated protein 1 OS=Homo sapiens OX=9606 GN=SYAP1 PE=1 SV=1	9	3	4	3	352	39.9	4.53	48	103.6	102.3	101.6	93.9	99.1	99.5	102.5	97.5	-	1.05128	0.0577945
Q9NV96	TMEM30A	Cell cycle control protein 50A OS=Homo sapiens OX=9606 GN=TMEM30A PE=1 SV=1	19	6	12	6	361	40.7	8.59	117	101.7	102.4	103.3	99	98.5	95	102.467	97.5	-	1.05094	0.0207586
O75084	FZD7	Frizzled-7 OS=Homo sapiens OX=9606 GN=FZD7 PE=1 SV=2	1	1	1	1	574	63.6	7.81	14	100.1	94.6	112.7	95.9	100.7	95.9	102.467	97.5	-	1.05094	0.424567
Q9Y6V7	DDX49	Probable ATP-dependent RNA helicase DDX49 OS=Homo sapiens OX=9606 GN=DDX49 PE=1 SV=1	9	4	6	4	483	54.2	9.06	51	102.9	100.4	104.1	95.3	100.9	96.3	102.467	97.5	-	1.05094	0.0716102
Q7LGA3	HS2ST1	Heparan sulfate 2-O-sulfotransferase 1 OS=Homo sapiens OX=9606 GN=HS2ST1 PE=1 SV=1	21	6	14	6	356	41.9	8.69	144	108.1	100.3	99.1	96.7	98.5	97.4	102.5	97.5333	-	1.05092	0.158533
Q14684	RRP1B	Ribosomal RNA processing protein 1 homolog B OS=Homo sapiens OX=9606 GN=RRP1B PE=1 SV=3	23	12	24	12	758	84.4	9.76	323	98.1	106.7	102.7	100.6	95.7	96.3	102.5	97.5333	-	1.05092	0.164717
P07686	HEXB	Beta-hexosaminidase subunit beta OS=Homo sapiens OX=9606 GN=HEXB PE=1 SV=3	23	13	29	12	556	63.1	6.76	244	110.1	97.4	99.9	106.3	91.6	94.7	102.467	97.5333	-	1.05058	0.451858
Q9Y6H1	CHCHD2	Coiled-coil-helix-coiled-coil-helix domain-containing protein 2 OS=Homo sapiens OX=9606 GN=CHCHD2 PE=1 SV=1	15	2	10	2	151	15.5	9.22	156	86.4	106.7	114.3	83.8	104.5	104.3	102.467	97.5333	-	1.05058	0.671349
P18754	RCC1	Regulator of chromosome condensation OS=Homo sapiens OX=9606 GN=RCC1 PE=1 SV=1	27	10	30	10	421	44.9	7.52	359	101.9	102.5	103	99.4	96.6	96.6	102.467	97.5333	-	1.05058	0.0074729
Q8WZA1	POMGNT1	Protein O-linked-mannose beta-1,2-N-acetylglucosaminyltransferase 1 OS=Homo sapiens OX=9606 GN=POMGNT1 PE=1 SV=2	4	3	5	3	660	75.2	6.83	28	103.3	100.9	103.2	96.7	98.2	97.7	102.467	97.5333	-	1.05058	0.00538002
Q9H5Q4	TFB2M	Dimethyladenosine transferase 2, mitochondrial OS=Homo sapiens OX=9606 GN=TFB2M PE=1 SV=1	13	6	10	6	396	45.3	9.19	100	101.2	105.5	100.7	97.8	96.9	97.9	102.467	97.5333	-	1.05058	0.0338639
P84103	SRSF3	Serine/arginine-rich splicing factor 3 OS=Homo sapiens OX=9606 GN=SRSF3 PE=1 SV=1	35	6	44	5	164	19.3	11.65	577	101.5	106.9	99	101.2	96.1	95.3	102.467	97.5333	-	1.05058	0.172571
P22307	SCP2	Non-specific lipid-transfer protein OS=Homo sapiens OX=9606 GN=SCP2 PE=1 SV=2	22	14	45	14	547	59	6.89	543	106.8	100.5	100.1	101.6	94.7	96.3	102.467	97.5333	-	1.05058	0.176475
Q6UW78	UQCC3	Ubiquinol-cytochrome-c reductase complex assembly factor 3 OS=Homo sapiens OX=9606 GN=UQCC3 PE=1 SV=2	9	1	1	1	93	10.1	9.41	23	107.6	95.6	104.2	98.3	94.9	99.4	102.467	97.5333	-	1.05058	0.266027
Q9H078	CLPB	Caseinolytic peptidase B protein homolog OS=Homo sapiens OX=9606 GN=CLPB PE=1 SV=1	31	20	58	20	707	78.7	9.01	582	100.6	103.7	103	98.1	97.3	97.2	102.433	97.5333	-	1.05024	0.00751559
Q9Y2X3	NOP58	Nucleolar protein 58 OS=Homo sapiens OX=9606 GN=NOP58 PE=1 SV=1	32	16	55	16	529	59.5	8.92	768	99.4	104	103.9	97	99.3	96.3	102.433	97.5333	-	1.05024	0.0501719
Q9Y383	LUC7L2	Putative RNA-binding protein Luc7-like 2 OS=Homo sapiens OX=9606 GN=LUC7L2 PE=1 SV=2	28	11	31	7	392	46.5	10.01	294	98.4	104.2	104.7	96.7	97.9	98	102.433	97.5333	-	1.05024	0.0765338
O14578	CIT	Citron Rho-interacting kinase OS=Homo sapiens OX=9606 GN=CIT PE=1 SV=2	5	11	12	11	2027	231.3	6.57	44	92.5	113	101.8	103	95.8	93.8	102.433	97.5333	-	1.05024	0.496099
P12004	PCNA	Proliferating cell nuclear antigen OS=Homo sapiens OX=9606 GN=PCNA PE=1 SV=1	39	9	29	9	261	28.8	4.69	426	102.5	103.3	101.5	92.2	99.2	101.2	102.433	97.5333	-	1.05024	0.152493
Q8N9N5	BANP	Protein BANP OS=Homo sapiens OX=9606 GN=BANP PE=1 SV=3	6	2	2	2	519	56.5	5.49	45	109	98.6	99.7	97.6	97.2	97.8	102.433	97.5333	-	1.05024	0.212137
Q15813	TBCE	Tubulin-specific chaperone E OS=Homo sapiens OX=9606 GN=TBCE PE=1 SV=1	3	1	1	1	527	59.3	6.76	28	106.3	85.1	115.9	94.5	107.7	90.4	102.433	97.5333	-	1.05024	0.664719
Q9Y5M8	SRPRB	Signal recognition particle receptor subunit beta OS=Homo sapiens OX=9606 GN=SRPRB PE=1 SV=3	52	12	47	12	271	29.7	9.04	936	101.2	104.4	101.8	96.7	98.4	97.6	102.467	97.5667	-	1.05022	0.0111367
P42766	RPL35	60S ribosomal protein L35 OS=Homo sapiens OX=9606 GN=RPL35 PE=1 SV=2	33	5	18	5	123	14.5	11.05	146	97.4	107.2	102.8	96.6	96.9	99.2	102.467	97.5667	-	1.05022	0.172105
Q6IPR1	ETFRF1	Electron transfer flavoprotein regulatory factor 1 OS=Homo sapiens OX=9606 GN=ETFRF1 PE=1 SV=2	10	1	1	1	90	10.9	9.92	0	104.7	102.2	100.5	102.7	93.2	96.8	102.467	97.5667	-	1.05022	0.180675
Q8TBP5	FAM174A	Membrane protein FAM174A OS=Homo sapiens OX=9606 GN=FAM174A PE=2 SV=1	5	1	1	1	190	19.9	6.33	38	96.9	104.8	105.7	101.3	95.2	96.2	102.467	97.5667	-	1.05022	0.220041
Q96E11	MRRF	Ribosome-recycling factor, mitochondrial OS=Homo sapiens OX=9606 GN=MRRF PE=1 SV=1	24	6	15	6	262	29.3	9.79	182	99.8	94.8	112.8	97.4	98.2	97.1	102.467	97.5667	-	1.05022	0.413498
P19971	TYMP	Thymidine phosphorylase OS=Homo sapiens OX=9606 GN=TYMP PE=1 SV=2	6	2	3	2	482	49.9	5.53	42	106.9	101.9	98.5	95.9	96.3	100.5	102.433	97.5667	-	1.04988	0.162758
Q9NS69	TOMM22	Mitochondrial import receptor subunit TOM22 homolog OS=Homo sapiens OX=9606 GN=TOMM22 PE=1 SV=3	41	3	15	3	142	15.5	4.34	478	100.2	107.9	99.2	96.7	98.7	97.3	102.433	97.5667	-	1.04988	0.158521
P47985	UQCRFS1	Cytochrome b-c1 complex subunit Rieske, mitochondrial OS=Homo sapiens OX=9606 GN=UQCRFS1 PE=1 SV=2	25	9	27	9	274	29.6	8.32	256	103.7	103.3	100.3	98.5	96.2	98	102.433	97.5667	-	1.04988	0.0190788
Q9GZM5	YIPF3	Protein YIPF3 OS=Homo sapiens OX=9606 GN=YIPF3 PE=1 SV=1	6	2	6	2	350	38.2	5.76	83	101.3	104.7	101.3	99.6	95	98.1	102.433	97.5667	-	1.04988	0.0510746
Q96GQ5	C16orf58	RUS1 family protein C16orf58 OS=Homo sapiens OX=9606 GN=C16orf58 PE=1 SV=2	18	8	13	8	468	51	6.93	132	106.9	102	98.4	99.3	94.7	98.7	102.433	97.5667	-	1.04988	0.163493
Q14241	ELOA	Elongin-A OS=Homo sapiens OX=9606 GN=ELOA PE=1 SV=2	7	6	9	6	798	89.9	9.57	95	95	98.8	113.5	99.2	96.8	96.7	102.433	97.5667	-	1.04988	0.441323
Q9UNZ5	C19orf53	Leydig cell tumor 10 kDa protein homolog OS=Homo sapiens OX=9606 GN=C19orf53 PE=1 SV=1	33	5	12	5	99	10.6	11.55	113	95.7	104.3	107.3	101.4	97.1	94.2	102.433	97.5667	-	1.04988	0.296495
Q6UW02	CYP20A1	Cytochrome P450 20A1 OS=Homo sapiens OX=9606 GN=CYP20A1 PE=1 SV=1	18	7	13	7	462	52.4	6.21	110	102.3	102.1	102.9	98.8	96.5	97.4	102.433	97.5667	-	1.04988	0.00238428
P09012	SNRPA	U1 small nuclear ribonucleoprotein A OS=Homo sapiens OX=9606 GN=SNRPA PE=1 SV=3	45	10	35	8	282	31.3	9.83	552	99.9	103.4	104	100.9	95.9	95.9	102.433	97.5667	-	1.04988	0.0814152
Q92575	UBXN4	UBX domain-containing protein 4 OS=Homo sapiens OX=9606 GN=UBXN4 PE=1 SV=2	14	7	17	7	508	56.7	6.38	154	102.9	106.4	98	100.7	96.4	95.6	102.433	97.5667	-	1.04988	0.169254
Q9Y5J6	TIMM10B	Mitochondrial import inner membrane translocase subunit Tim10 B OS=Homo sapiens OX=9606 GN=TIMM10B PE=1 SV=1	55	4	7	4	103	11.6	7.43	122	104	104.7	98.6	96.4	96.1	100.2	102.433	97.5667	-	1.04988	0.105593
P12694	BCKDHA	2-oxoisovalerate dehydrogenase subunit alpha, mitochondrial OS=Homo sapiens OX=9606 GN=BCKDHA PE=1 SV=2	16	6	10	6	445	50.4	8.27	52	99.4	104.4	103.5	91.3	98.5	102.9	102.433	97.5667	-	1.04988	0.260326
Q7Z5J4	RAI1	Retinoic acid-induced protein 1 OS=Homo sapiens OX=9606 GN=RAI1 PE=1 SV=2	4	5	5	5	1906	203.2	8.79	76	109.4	100.1	97.8	100	98.3	94.4	102.433	97.5667	-	1.04988	0.281656
Q9NS93	TM7SF3	Transmembrane 7 superfamily member 3 OS=Homo sapiens OX=9606 GN=TM7SF3 PE=2 SV=1	3	2	5	2	570	64.1	7.01	58	98.4	102.9	105.9	96.8	94.7	101.2	102.4	97.5667	-	1.04954	0.171063
Q96CP6	GRAMD1A	Protein Aster-A OS=Homo sapiens OX=9606 GN=GRAMD1A PE=1 SV=2	3	1	1	1	724	80.6	6.74	53	97.9	98.5	110.8	96.3	97.7	98.7	102.4	97.5667	-	1.04954	0.320009
Q9ULJ8	PPP1R9A	Neurabin-1 OS=Homo sapiens OX=9606 GN=PPP1R9A PE=1 SV=2	2	3	6	1	1098	123.3	5.1	67	103.9	102.5	100.8	95.4	99.6	97.7	102.4	97.5667	-	1.04954	0.0328221
Q15397	PUM3	Pumilio homolog 3 OS=Homo sapiens OX=9606 GN=PUM3 PE=1 SV=3	15	9	20	9	648	73.5	9.64	135	103.4	104	99.9	97.4	96.8	98.6	102.433	97.6	-	1.04952	0.0250497
Q9P2N5	RBM27	RNA-binding protein 27 OS=Homo sapiens OX=9606 GN=RBM27 PE=1 SV=2	11	11	17	10	1060	118.6	9.19	250	101.2	105.1	101	98.8	96.9	97.1	102.433	97.6	-	1.04952	0.0299173
O75940	SMNDC1	Survival of motor neuron-related-splicing factor 30 OS=Homo sapiens OX=9606 GN=SMNDC1 PE=1 SV=1	17	3	3	3	238	26.7	7.24	107	101.1	107	99.2	98.2	98.3	96.3	102.433	97.6	-	1.04952	0.118325
P28288	ABCD3	ATP-binding cassette sub-family D member 3 OS=Homo sapiens OX=9606 GN=ABCD3 PE=1 SV=1	20	14	43	14	659	75.4	9.36	488	103	102.9	101.4	99.5	97.1	96.2	102.433	97.6	-	1.04952	0.0122111
P46939	UTRN	Utrophin OS=Homo sapiens OX=9606 GN=UTRN PE=1 SV=2	18	60	102	60	3433	394.2	5.33	971	102.6	100.7	104	98.2	96.4	98.2	102.433	97.6	-	1.04952	0.0128333
O95470	SGPL1	Sphingosine-1-phosphate lyase 1 OS=Homo sapiens OX=9606 GN=SGPL1 PE=1 SV=3	27	16	36	16	568	63.5	9.16	195	102.2	106.2	98.9	97.3	97.8	97.7	102.433	97.6	-	1.04952	0.0844039
Q96ER9	CCDC51	Mitochondrial potassium channel OS=Homo sapiens OX=9606 GN=CCDC51 PE=1 SV=2	32	13	30	13	411	45.8	8.19	256	102.8	102.9	101.6	97.8	97	98	102.433	97.6	-	1.04952	0.000731533
P10243	MYBL1	Myb-related protein A OS=Homo sapiens OX=9606 GN=MYBL1 PE=1 SV=2	1	1	1	1	752	85.8	7.12	0	104.1	91.7	111.4	91.4	95.8	105.6	102.4	97.6	-	1.04918	0.537097
O43399	TPD52L2	Tumor protein D54 OS=Homo sapiens OX=9606 GN=TPD52L2 PE=1 SV=2	62	12	44	12	206	22.2	5.36	675	108.2	99.8	99.2	96.7	98	98.1	102.4	97.6	-	1.04918	0.177874
Q96AJ9	VTI1A	Vesicle transport through interaction with t-SNAREs homolog 1A OS=Homo sapiens OX=9606 GN=VTI1A PE=1 SV=2	11	3	4	3	217	25.2	6.4	43	98.2	103.6	105.4	99.2	98.9	94.7	102.4	97.6	-	1.04918	0.139264
P29084	GTF2E2	Transcription initiation factor IIE subunit beta OS=Homo sapiens OX=9606 GN=GTF2E2 PE=1 SV=1	10	3	4	3	291	33	9.66	39	96.9	106	104.3	99.5	98.2	95.1	102.4	97.6	-	1.04918	0.194512
P67809	YBX1	Y-box-binding protein 1 OS=Homo sapiens OX=9606 GN=YBX1 PE=1 SV=3	47	9	34	6	324	35.9	9.88	928	100.7	108	98.5	89.1	104.3	99.4	102.4	97.6	-	1.04918	0.417972
O94888	UBXN7	UBX domain-containing protein 7 OS=Homo sapiens OX=9606 GN=UBXN7 PE=1 SV=2	3	2	2	2	489	54.8	5.16	0	98.6	110	98.6	108.5	82.7	101.6	102.4	97.6	-	1.04918	0.606395
P43246	MSH2	DNA mismatch repair protein Msh2 OS=Homo sapiens OX=9606 GN=MSH2 PE=1 SV=1	22	20	45	20	934	104.7	5.77	526	101.3	100.8	105.1	97	98	97.8	102.4	97.6	-	1.04918	0.0260744
O76021	RSL1D1	Ribosomal L1 domain-containing protein 1 OS=Homo sapiens OX=9606 GN=RSL1D1 PE=1 SV=3	38	22	74	22	490	54.9	10.13	1098	98.2	106.8	102.2	98.5	98.9	95.4	102.4	97.6	-	1.04918	0.152341
Q9Y5X1	SNX9	Sorting nexin-9 OS=Homo sapiens OX=9606 GN=SNX9 PE=1 SV=1	11	7	8	7	595	66.6	5.58	29	99.5	100.4	107.3	96.1	96.7	100	102.4	97.6	-	1.04918	0.155368
Q96CT7	CCDC124	Coiled-coil domain-containing protein 124 OS=Homo sapiens OX=9606 GN=CCDC124 PE=1 SV=1	41	10	19	10	223	25.8	9.54	215	101.3	101.3	104.6	99.6	98.2	95	102.4	97.6	-	1.04918	0.051773
Q9BV81	EMC6	ER membrane protein complex subunit 6 OS=Homo sapiens OX=9606 GN=EMC6 PE=1 SV=1	21	3	13	3	110	12	10.07	168	97.8	105.3	104.1	96.3	96	100.5	102.4	97.6	-	1.04918	0.154947
Q9H2W6	MRPL46	39S ribosomal protein L46, mitochondrial OS=Homo sapiens OX=9606 GN=MRPL46 PE=1 SV=1	30	8	21	8	279	31.7	7.05	379	101.4	100.8	105	97.3	98.8	96.7	102.4	97.6	-	1.04918	0.0298087
O14936	CASK	Peripheral plasma membrane protein CASK OS=Homo sapiens OX=9606 GN=CASK PE=1 SV=3	7	6	8	6	926	105.1	6.43	42	102.3	101.6	103.2	102.1	95.5	95.2	102.367	97.6	-	1.04884	0.1068
Q7KZ85	SUPT6H	Transcription elongation factor SPT6 OS=Homo sapiens OX=9606 GN=SUPT6H PE=1 SV=2	6	8	12	8	1726	198.9	4.91	175	100.9	101	105.3	95.6	97.8	99.5	102.4	97.6333	-	1.04882	0.0604556
Q15059	BRD3	Bromodomain-containing protein 3 OS=Homo sapiens OX=9606 GN=BRD3 PE=1 SV=1	9	7	14	2	726	79.5	9.36	50	103.7	105.3	98.2	98.3	96.9	97.7	102.4	97.6333	-	1.04882	0.0949087
Q9NX24	NHP2	H/ACA ribonucleoprotein complex subunit 2 OS=Homo sapiens OX=9606 GN=NHP2 PE=1 SV=1	38	4	11	4	153	17.2	8.22	285	102.1	106.9	98.2	97.8	98	97.1	102.4	97.6333	-	1.04882	0.132738
P14209	CD99	CD99 antigen OS=Homo sapiens OX=9606 GN=CD99 PE=1 SV=1	13	2	4	2	185	18.8	4.75	164	101	100.4	105.8	100.7	93.1	99.1	102.4	97.6333	-	1.04882	0.172775
Q5HYK3	COQ5	2-methoxy-6-polyprenyl-1,4-benzoquinol methylase, mitochondrial OS=Homo sapiens OX=9606 GN=COQ5 PE=1 SV=2	22	6	13	6	327	37.1	6.95	207	104.1	102	101	98.9	96.5	97.5	102.367	97.6333	-	1.04848	0.0145937
Q9BUE6	ISCA1	Iron-sulfur cluster assembly 1 homolog, mitochondrial OS=Homo sapiens OX=9606 GN=ISCA1 PE=1 SV=1	52	5	6	5	129	14.2	9.07	90	100.6	106.1	100.4	94.4	95.4	103.1	102.367	97.6333	-	1.04848	0.227438
Q8IZ81	ELMOD2	ELMO domain-containing protein 2 OS=Homo sapiens OX=9606 GN=ELMOD2 PE=1 SV=1	20	5	13	5	293	34.9	8.05	82	103.1	105.4	98.6	99.8	94.7	98.4	102.367	97.6333	-	1.04848	0.132441
O95625	ZBTB11	Zinc finger and BTB domain-containing protein 11 OS=Homo sapiens OX=9606 GN=ZBTB11 PE=1 SV=2	4	4	4	4	1053	119.3	8.66	16	100.4	102.1	104.6	94	95.1	103.8	102.367	97.6333	-	1.04848	0.228361
Q8TBK6	ZCCHC10	Zinc finger CCHC domain-containing protein 10 OS=Homo sapiens OX=9606 GN=ZCCHC10 PE=1 SV=1	7	1	3	1	192	21	8.53	58	101.9	100	105.2	103	94.2	95.7	102.367	97.6333	-	1.04848	0.203112
Q9Y2R9	MRPS7	28S ribosomal protein S7, mitochondrial OS=Homo sapiens OX=9606 GN=MRPS7 PE=1 SV=2	44	10	21	10	242	28.1	9.99	254	104.5	101.1	101.5	97.9	97.1	97.9	102.367	97.6333	-	1.04848	0.0128328
O94973	AP2A2	AP-2 complex subunit alpha-2 OS=Homo sapiens OX=9606 GN=AP2A2 PE=1 SV=2	25	22	44	12	939	103.9	6.96	637	106.2	99.2	101.7	98.5	95.3	99.1	102.367	97.6333	-	1.04848	0.115748
P26368	U2AF2	Splicing factor U2AF 65 kDa subunit OS=Homo sapiens OX=9606 GN=U2AF2 PE=1 SV=4	27	10	31	10	475	53.5	9.09	653	96.6	105.3	105.2	96.9	97.6	98.4	102.367	97.6333	-	1.04848	0.179845
Q07817	BCL2L1	Bcl-2-like protein 1 OS=Homo sapiens OX=9606 GN=BCL2L1 PE=1 SV=1	14	3	8	3	233	26	4.93	19	94.7	110.9	101.5	97.9	97.2	97.8	102.367	97.6333	-	1.04848	0.371018
P07203	GPX1	Glutathione peroxidase 1 OS=Homo sapiens OX=9606 GN=GPX1 PE=1 SV=4	29	6	11	6	203	22.1	6.55	106	102.9	102.7	101.5	101	94.2	97.7	102.367	97.6333	-	1.04848	0.0782325
Q8N4H5	TOMM5	Mitochondrial import receptor subunit TOM5 homolog OS=Homo sapiens OX=9606 GN=TOMM5 PE=1 SV=1	29	2	7	2	51	6	9.7	37	93.9	110.2	102.9	104.9	94.1	93.9	102.333	97.6333	-	1.04814	0.473903
O14832	PHYH	Phytanoyl-CoA dioxygenase, peroxisomal OS=Homo sapiens OX=9606 GN=PHYH PE=1 SV=1	28	10	14	10	338	38.5	8.47	105	104.3	102.6	100.1	100.7	96.3	95.9	102.333	97.6333	-	1.04814	0.0747891
Q12972	PPP1R8	Nuclear inhibitor of protein phosphatase 1 OS=Homo sapiens OX=9606 GN=PPP1R8 PE=1 SV=2	9	2	3	2	351	38.5	7.37	112	109.9	95.8	101.3	91	99.7	102.2	102.333	97.6333	-	1.04814	0.427288
O43920	NDUFS5	NADH dehydrogenase [ubiquinone] iron-sulfur protein 5 OS=Homo sapiens OX=9606 GN=NDUFS5 PE=1 SV=3	40	4	10	4	106	12.5	9.14	82	103.2	102.1	101.7	98.3	95.7	98.9	102.333	97.6333	-	1.04814	0.0121244
Q14671	PUM1	Pumilio homolog 1 OS=Homo sapiens OX=9606 GN=PUM1 PE=1 SV=3	7	9	13	6	1186	126.4	6.84	106	101.3	102.4	103.3	95.7	98.1	99.1	102.333	97.6333	-	1.04814	0.0155809
Q8IZ69	TRMT2A	tRNA (uracil-5-)-methyltransferase homolog A OS=Homo sapiens OX=9606 GN=TRMT2A PE=1 SV=2	3	2	2	2	625	68.7	7.94	0	94.1	103.2	109.7	90.9	99.2	102.8	102.333	97.6333	-	1.04814	0.458455
O43290	SART1	U4/U6.U5 tri-snRNP-associated protein 1 OS=Homo sapiens OX=9606 GN=SART1 PE=1 SV=1	36	22	53	22	800	90.2	6.13	1059	97.9	101	108.2	100.2	96.7	96.1	102.367	97.6667	-	1.04812	0.228403
Q5T0F9	CC2D1B	Coiled-coil and C2 domain-containing protein 1B OS=Homo sapiens OX=9606 GN=CC2D1B PE=1 SV=1	4	4	4	4	858	94.2	5.26	38	103.3	98	105.7	95.8	99.6	97.6	102.333	97.6667	-	1.04778	0.138356
P13010	XRCC5	X-ray repair cross-complementing protein 5 OS=Homo sapiens OX=9606 GN=XRCC5 PE=1 SV=3	24	20	67	20	732	82.7	5.81	951	99.7	107.6	99.7	95.5	97.4	100.1	102.333	97.6667	-	1.04778	0.189093
O60658	PDE8A	High affinity cAMP-specific and IBMX-insensitive 3',5'-cyclic phosphodiesterase 8A OS=Homo sapiens OX=9606 GN=PDE8A PE=1 SV=2	7	5	5	5	829	93.2	6.11	58	104.7	100.4	101.9	100.3	96.9	95.8	102.333	97.6667	-	1.04778	0.0651743
O76094	SRP72	Signal recognition particle subunit SRP72 OS=Homo sapiens OX=9606 GN=SRP72 PE=1 SV=3	32	20	45	20	671	74.6	9.26	605	97	105.1	104.9	96.5	99	97.5	102.333	97.6667	-	1.04778	0.166665
Q9UH62	ARMCX3	Armadillo repeat-containing X-linked protein 3 OS=Homo sapiens OX=9606 GN=ARMCX3 PE=1 SV=1	25	8	17	8	379	42.5	8.37	208	100.2	104.3	102.5	97.1	97.5	98.4	102.333	97.6667	-	1.04778	0.0200921
A8MWD9	SNRPGP15	Putative small nuclear ribonucleoprotein G-like protein 15 OS=Homo sapiens OX=9606 GN=SNRPGP15 PE=5 SV=2	36	4	11	4	76	8.5	8.84	64	103.3	99.1	104.6	97.9	96.2	98.9	102.333	97.6667	-	1.04778	0.0639807
P11166	SLC2A1	Solute carrier family 2, facilitated glucose transporter member 1 OS=Homo sapiens OX=9606 GN=SLC2A1 PE=1 SV=2	11	4	10	4	492	54	8.72	42	100.9	101.8	104.3	103.1	93	96.9	102.333	97.6667	-	1.04778	0.208061
Q7Z4V5	HDGFL2	Hepatoma-derived growth factor-related protein 2 OS=Homo sapiens OX=9606 GN=HDGFL2 PE=1 SV=1	15	9	17	8	671	74.3	7.49	103	99.8	102.2	105	98.5	97.8	96.7	102.333	97.6667	-	1.04778	0.042702
Q92544	TM9SF4	Transmembrane 9 superfamily member 4 OS=Homo sapiens OX=9606 GN=TM9SF4 PE=1 SV=2	23	13	34	13	642	74.5	6.54	276	102.4	102.6	102	96.7	97.9	98.4	102.333	97.6667	-	1.04778	0.000947249
Q9Y3C8	UFC1	Ubiquitin-fold modifier-conjugating enzyme 1 OS=Homo sapiens OX=9606 GN=UFC1 PE=1 SV=3	6	1	1	1	167	19.4	7.4	0	111.1	95.6	100.3	98	99.8	95.2	102.333	97.6667	-	1.04778	0.384175
Q13510	ASAH1	Acid ceramidase OS=Homo sapiens OX=9606 GN=ASAH1 PE=1 SV=5	13	6	10	6	395	44.6	7.62	116	106.9	100	100.1	103	95.2	94.8	102.333	97.6667	-	1.04778	0.254731
Q5T280	SPOUT1	Putative methyltransferase C9orf114 OS=Homo sapiens OX=9606 GN=SPOUT1 PE=1 SV=3	3	1	2	1	376	42	7.43	41	103.2	100	103.7	99.4	96.8	96.8	102.3	97.6667	-	1.04744	0.0328525
Q96FN4	CPNE2	Copine-2 OS=Homo sapiens OX=9606 GN=CPNE2 PE=1 SV=3	12	6	12	5	548	61.2	6.07	130	99.8	105.5	101.6	99.7	98.9	94.4	102.3	97.6667	-	1.04744	0.120646
P78310	CXADR	Coxsackievirus and adenovirus receptor OS=Homo sapiens OX=9606 GN=CXADR PE=1 SV=1	12	4	6	4	365	40	7.56	57	106.2	99.3	101.4	97.8	98.7	96.5	102.3	97.6667	-	1.04744	0.0962897
P15374	UCHL3	Ubiquitin carboxyl-terminal hydrolase isozyme L3 OS=Homo sapiens OX=9606 GN=UCHL3 PE=1 SV=1	11	2	3	2	230	26.2	4.92	31	104.3	97.3	105.3	93.4	97.7	101.9	102.3	97.6667	-	1.04744	0.257854
Q7L5Y9	MAEA	E3 ubiquitin-protein transferase MAEA OS=Homo sapiens OX=9606 GN=MAEA PE=1 SV=1	4	2	2	2	396	45.3	8.69	44	103.5	99.2	104.3	95.6	100	97.5	102.333	97.7	-	1.04742	0.0848233
Q92685	ALG3	Dol-P-Man:Man(5)GlcNAc(2)-PP-Dol alpha-1,3-mannosyltransferase OS=Homo sapiens OX=9606 GN=ALG3 PE=1 SV=1	3	1	1	1	438	50.1	9.44	28	104.6	99.4	103	96.5	102.6	94	102.333	97.7	-	1.04742	0.195113
Q9BX40	LSM14B	Protein LSM14 homolog B OS=Homo sapiens OX=9606 GN=LSM14B PE=1 SV=1	6	2	5	2	385	42	9.69	91	99.4	104.7	102.9	100.3	96.4	96.4	102.333	97.7	-	1.04742	0.0843068
O75122	CLASP2	CLIP-associating protein 2 OS=Homo sapiens OX=9606 GN=CLASP2 PE=1 SV=3	10	12	18	11	1294	141	8.4	65	102.6	103.8	100.6	95.7	98.9	98.5	102.333	97.7	-	1.04742	0.0279086
P62995	TRA2B	Transformer-2 protein homolog beta OS=Homo sapiens OX=9606 GN=TRA2B PE=1 SV=1	22	6	29	5	288	33.6	11.25	353	99.1	105.3	102.6	100.8	96	96.3	102.333	97.7	-	1.04742	0.122602
P46100	ATRX	Transcriptional regulator ATRX OS=Homo sapiens OX=9606 GN=ATRX PE=1 SV=5	8	15	18	15	2492	282.4	6.58	179	102.2	98.9	105.8	96.5	97.7	98.9	102.3	97.7	-	1.04708	0.09468
Q5QJE6	DNTTIP2	Deoxynucleotidyltransferase terminal-interacting protein 2 OS=Homo sapiens OX=9606 GN=DNTTIP2 PE=1 SV=2	19	12	25	12	756	84.4	6.16	423	101.4	103.7	101.8	98	97.3	97.8	102.3	97.7	-	1.04708	0.0033981
A2RU67	FAM234B	Protein FAM234B OS=Homo sapiens OX=9606 GN=FAM234B PE=1 SV=1	6	3	4	3	622	67	5.02	87	98.3	95.6	113	97.9	93.4	101.8	102.3	97.7	-	1.04708	0.480963
Q9UK59	DBR1	Lariat debranching enzyme OS=Homo sapiens OX=9606 GN=DBR1 PE=1 SV=2	2	1	2	1	544	61.5	5.47	31	95.9	104.6	106.4	90.8	103.2	99.1	102.3	97.7	-	1.04708	0.399236
Q13573	SNW1	SNW domain-containing protein 1 OS=Homo sapiens OX=9606 GN=SNW1 PE=1 SV=1	36	15	28	15	536	61.5	9.52	400	104.9	103	99	96.7	99.4	97	102.3	97.7	-	1.04708	0.0764558
Q12846	STX4	Syntaxin-4 OS=Homo sapiens OX=9606 GN=STX4 PE=1 SV=2	30	7	14	7	297	34.2	6.28	113	102.7	105.1	99.1	101.9	94.7	96.5	102.3	97.7	-	1.04708	0.17315
Q06830	PRDX1	Peroxiredoxin-1 OS=Homo sapiens OX=9606 GN=PRDX1 PE=1 SV=1	49	10	49	7	199	22.1	8.13	582	106	96	104.9	95.2	98.8	99.1	102.3	97.7	-	1.04708	0.248059
P38646	HSPA9	Stress-70 protein, mitochondrial OS=Homo sapiens OX=9606 GN=HSPA9 PE=1 SV=2	54	43	340	42	679	73.6	6.16	5760	103.6	104.9	98.4	100	96.7	96.4	102.3	97.7	-	1.04708	0.115699
P30414	NKTR	NK-tumor recognition protein OS=Homo sapiens OX=9606 GN=NKTR PE=1 SV=2	1	2	2	2	1462	165.6	9.99	31	105.3	102.3	99.3	102.2	94.1	96.8	102.3	97.7	-	1.04708	0.193263
Q5JVF3	PCID2	PCI domain-containing protein 2 OS=Homo sapiens OX=9606 GN=PCID2 PE=1 SV=2	16	6	9	6	399	46	8.53	55	102.6	101.9	102.4	97.6	98.2	97.3	102.3	97.7	-	1.04708	0.000166144
O75396	SEC22B	Vesicle-trafficking protein SEC22b OS=Homo sapiens OX=9606 GN=SEC22B PE=1 SV=4	39	8	47	8	215	24.6	6.92	1078	102	105.1	99.7	98.7	96.4	98	102.267	97.7	-	1.04674	0.0554289
P04156	PRNP	Major prion protein OS=Homo sapiens OX=9606 GN=PRNP PE=1 SV=1	20	5	18	5	253	27.6	9	257	99.5	104.6	102.7	102.2	95.8	95.1	102.267	97.7	-	1.04674	0.166655
P24390	KDELR1	ER lumen protein-retaining receptor 1 OS=Homo sapiens OX=9606 GN=KDELR1 PE=1 SV=1	4	1	5	1	212	24.5	8.62	66	116.1	97.8	93	98.9	99.8	94.5	102.3	97.7333	-	1.04673	0.561707
P23511	NFYA	Nuclear transcription factor Y subunit alpha OS=Homo sapiens OX=9606 GN=NFYA PE=1 SV=2	5	1	1	1	347	36.9	8.94	67	99.4	108.1	99.3	93.3	90.4	109.5	102.267	97.7333	-	1.04638	0.531084
P61764	STXBP1	Syntaxin-binding protein 1 OS=Homo sapiens OX=9606 GN=STXBP1 PE=1 SV=1	10	6	8	6	594	67.5	6.96	106	105.5	95.6	105.7	96.3	99	97.9	102.267	97.7333	-	1.04638	0.256186
Q86UE4	MTDH	Protein LYRIC OS=Homo sapiens OX=9606 GN=MTDH PE=1 SV=2	42	22	59	22	582	63.8	9.32	1058	100.8	104.5	101.5	99.6	97	96.6	102.267	97.7333	-	1.04638	0.037081
P12235	SLC25A4	ADP/ATP translocase 1 OS=Homo sapiens OX=9606 GN=SLC25A4 PE=1 SV=4	44	15	56	5	298	33	9.76	558	103.6	101.8	101.4	97.5	98.1	97.6	102.267	97.7333	-	1.04638	0.0029543
O94886	TMEM63A	CSC1-like protein 1 OS=Homo sapiens OX=9606 GN=TMEM63A PE=1 SV=3	1	1	2	1	807	92.1	7.27	36	99.4	107.8	99.6	101.4	95.5	96.3	102.267	97.7333	-	1.04638	0.244743
P61218	POLR2F	DNA-directed RNA polymerases I, II, and III subunit RPABC2 OS=Homo sapiens OX=9606 GN=POLR2F PE=1 SV=1	27	3	4	3	127	14.5	4.22	60	100.8	103.9	102.1	94.4	102.8	96	102.267	97.7333	-	1.04638	0.171823
P00505	GOT2	Aspartate aminotransferase, mitochondrial OS=Homo sapiens OX=9606 GN=GOT2 PE=1 SV=3	38	19	72	19	430	47.5	9.01	958	104.4	102.1	100.3	97.6	98.1	97.5	102.267	97.7333	-	1.04638	0.0195222
Q14739	LBR	Delta(14)-sterol reductase LBR OS=Homo sapiens OX=9606 GN=LBR PE=1 SV=2	20	13	21	13	615	70.7	9.36	162	104	102.7	100.1	97.9	98.2	97.1	102.267	97.7333	-	1.04638	0.019082
P28066	PSMA5	Proteasome subunit alpha type-5 OS=Homo sapiens OX=9606 GN=PSMA5 PE=1 SV=3	32	6	16	6	241	26.4	4.79	208	102.5	95.8	108.4	94.1	101.9	97.2	102.233	97.7333	-	1.04604	0.353219
P19387	POLR2C	DNA-directed RNA polymerase II subunit RPB3 OS=Homo sapiens OX=9606 GN=POLR2C PE=1 SV=2	4	1	2	1	275	31.4	4.92	33	100	97.7	109	95.3	98.1	99.8	102.233	97.7333	-	1.04604	0.28953
Q9BRX2	PELO	Protein pelota homolog OS=Homo sapiens OX=9606 GN=PELO PE=1 SV=2	6	2	2	2	385	43.3	6.34	31	97.2	99	110.5	97	100.1	96.1	102.233	97.7333	-	1.04604	0.358211
Q13438	OS9	Protein OS-9 OS=Homo sapiens OX=9606 GN=OS9 PE=1 SV=1	24	12	19	12	667	75.5	4.87	321	104.4	99.6	102.8	96.4	98.3	98.6	102.267	97.7667	-	1.04603	0.0456587
Q5J8M3	EMC4	ER membrane protein complex subunit 4 OS=Homo sapiens OX=9606 GN=EMC4 PE=1 SV=2	38	6	17	6	183	20.1	8.62	307	100.4	105.2	101.2	99.6	95.8	97.9	102.267	97.7667	-	1.04603	0.0715091
Q7Z3B4	NUP54	Nucleoporin p54 OS=Homo sapiens OX=9606 GN=NUP54 PE=1 SV=2	26	12	20	12	507	55.4	7.02	364	105.8	96.7	104.3	96.4	98.2	98.7	102.267	97.7667	-	1.04603	0.195936
Q5C9Z4	NOM1	Nucleolar MIF4G domain-containing protein 1 OS=Homo sapiens OX=9606 GN=NOM1 PE=1 SV=1	9	8	15	8	860	96.2	8.1	145	101.6	104	101.2	99.7	96.7	96.9	102.267	97.7667	-	1.04603	0.0260762
Q9BX95	SGPP1	Sphingosine-1-phosphate phosphatase 1 OS=Homo sapiens OX=9606 GN=SGPP1 PE=1 SV=2	15	8	22	8	441	49.1	8.82	134	102.2	103	101.6	97	97.9	98.4	102.267	97.7667	-	1.04603	0.00145242
Q69YH5	CDCA2	Cell division cycle-associated protein 2 OS=Homo sapiens OX=9606 GN=CDCA2 PE=1 SV=2	13	10	13	10	1023	112.6	8.4	122	102.6	103.5	100.6	102.7	96.4	94.2	102.233	97.7667	-	1.04569	0.171835
Q9BUL9	RPP25	Ribonuclease P protein subunit p25 OS=Homo sapiens OX=9606 GN=RPP25 PE=1 SV=1	16	3	4	3	199	20.6	9.61	49	99.3	106.9	100.5	95.2	97.1	101	102.233	97.7667	-	1.04569	0.199822
O94905	ERLIN2	Erlin-2 OS=Homo sapiens OX=9606 GN=ERLIN2 PE=1 SV=1	42	15	40	12	339	37.8	5.62	694	102.4	106.1	98.2	99.8	98.5	95	102.233	97.7667	-	1.04569	0.172762
Q9GZT6	CCDC90B	Coiled-coil domain-containing protein 90B, mitochondrial OS=Homo sapiens OX=9606 GN=CCDC90B PE=1 SV=2	28	8	15	8	254	29.5	7.55	140	101.8	101.1	103.8	99.9	100	93.4	102.233	97.7667	-	1.04569	0.127535
O14763	TNFRSF10B	Tumor necrosis factor receptor superfamily member 10B OS=Homo sapiens OX=9606 GN=TNFRSF10B PE=1 SV=2	14	5	10	5	440	47.8	5.55	121	104	102.3	100.4	101.7	95.1	96.5	102.233	97.7667	-	1.04569	0.119414
P08236	GUSB	Beta-glucuronidase OS=Homo sapiens OX=9606 GN=GUSB PE=1 SV=2	4	3	4	3	651	74.7	7.02	23	109.6	97.7	99.3	103.3	91.1	98.9	102.2	97.7667	-	1.04535	0.438703
Q9H9A5	CNOT10	CCR4-NOT transcription complex subunit 10 OS=Homo sapiens OX=9606 GN=CNOT10 PE=1 SV=1	6	4	4	4	744	82.3	7.78	53	102.4	105.1	99.1	99.9	96.8	96.6	102.2	97.7667	-	1.04535	0.0951749
O14647	CHD2	Chromodomain-helicase-DNA-binding protein 2 OS=Homo sapiens OX=9606 GN=CHD2 PE=1 SV=2	11	19	31	14	1828	211.2	8.1	318	102	100.7	103.9	97.7	98.4	97.2	102.2	97.7667	-	1.04535	0.0110898
Q13825	AUH	Methylglutaconyl-CoA hydratase, mitochondrial OS=Homo sapiens OX=9606 GN=AUH PE=1 SV=1	17	6	7	6	339	35.6	9.48	45	105.4	100.9	100.3	99.5	95.5	98.3	102.2	97.7667	-	1.04535	0.0907931
Q8TBR7	TLCD3A	TLC domain-containing protein 3A OS=Homo sapiens OX=9606 GN=TLCD3A PE=1 SV=2	13	4	6	4	257	29.4	9.41	13	101.6	102.5	102.5	95.7	97.8	99.8	102.2	97.7667	-	1.04535	0.0221486
Q9NWT1	PAK1IP1	p21-activated protein kinase-interacting protein 1 OS=Homo sapiens OX=9606 GN=PAK1IP1 PE=1 SV=2	22	9	14	9	392	43.9	8.91	102	99.9	103.1	103.6	98.4	97	97.9	102.2	97.7667	-	1.04535	0.0226275
Q69YN4	VIRMA	Protein virilizer homolog OS=Homo sapiens OX=9606 GN=VIRMA PE=1 SV=2	2	5	8	5	1812	201.9	5.01	40	96.9	104.8	104.9	99	94	100.3	102.2	97.7667	-	1.04535	0.247003
Q8TD43	TRPM4	Transient receptor potential cation channel subfamily M member 4 OS=Homo sapiens OX=9606 GN=TRPM4 PE=1 SV=1	4	4	4	4	1214	134.2	8.15	50	102.5	97.3	106.9	100.8	95.9	96.7	102.233	97.8	-	1.04533	0.233585
Q9NZN4	EHD2	EH domain-containing protein 2 OS=Homo sapiens OX=9606 GN=EHD2 PE=1 SV=2	25	15	31	13	543	61.1	6.46	171	102.6	101.7	102.4	94.3	98.8	100.3	102.233	97.8	-	1.04533	0.071866
P04049	RAF1	RAF proto-oncogene serine/threonine-protein kinase OS=Homo sapiens OX=9606 GN=RAF1 PE=1 SV=1	5	3	5	1	648	73	9.2	41	105.2	98.2	103.3	96.1	102	95.3	102.233	97.8	-	1.04533	0.210015
Q9HD26	GOPC	Golgi-associated PDZ and coiled-coil motif-containing protein OS=Homo sapiens OX=9606 GN=GOPC PE=1 SV=1	13	6	9	6	462	50.5	5.92	102	105.1	99.8	101.8	94.7	98.6	100.1	102.233	97.8	-	1.04533	0.117845
Q86YH6	PDSS2	Decaprenyl-diphosphate synthase subunit 2 OS=Homo sapiens OX=9606 GN=PDSS2 PE=1 SV=2	12	4	6	4	399	44.1	8.24	56	100	105.7	101	99.2	96.3	97.9	102.233	97.8	-	1.04533	0.0850755
Q6DKI1	RPL7L1	60S ribosomal protein L7-like 1 OS=Homo sapiens OX=9606 GN=RPL7L1 PE=1 SV=2	15	3	10	3	255	29.7	10.52	229	94.1	97	115.6	95.2	98.3	99.9	102.233	97.8	-	1.04533	0.554169
Q13190	STX5	Syntaxin-5 OS=Homo sapiens OX=9606 GN=STX5 PE=1 SV=2	19	7	17	7	355	39.6	9.16	112	106	100.1	100.4	102.6	96.9	93.8	102.167	97.7667	-	1.04501	0.242691
Q92614	MYO18A	Unconventional myosin-XVIIIa OS=Homo sapiens OX=9606 GN=MYO18A PE=1 SV=3	1	2	2	2	2054	233	6.3	0	102.4	103.8	100.4	94.5	100.4	98.5	102.2	97.8	-	1.04499	0.092558
Q9UJ83	HACL1	2-hydroxyacyl-CoA lyase 1 OS=Homo sapiens OX=9606 GN=HACL1 PE=1 SV=2	22	12	18	12	578	63.7	7.36	211	102.8	104.3	99.5	99	98	96.4	102.2	97.8	-	1.04499	0.0520365
P54886	ALDH18A1	Delta-1-pyrroline-5-carboxylate synthase OS=Homo sapiens OX=9606 GN=ALDH18A1 PE=1 SV=2	30	22	56	22	795	87.2	7.12	565	101.9	103.7	101	97.8	97.2	98.4	102.2	97.8	-	1.04499	0.00707735
Q9Y4B6	DCAF1	DDB1- and CUL4-associated factor 1 OS=Homo sapiens OX=9606 GN=DCAF1 PE=1 SV=3	5	7	7	7	1507	168.9	5.06	32	104.2	98.4	104	99.5	96	97.9	102.2	97.8	-	1.04499	0.110518
Q99988	GDF15	Growth/differentiation factor 15 OS=Homo sapiens OX=9606 GN=GDF15 PE=1 SV=3	17	6	11	6	308	34.1	9.66	138	108.1	85.7	112.8	92.1	101.6	99.7	102.2	97.8	-	1.04499	0.645161
Q13948	CUX1	Protein CASP OS=Homo sapiens OX=9606 GN=CUX1 PE=1 SV=2	19	13	17	13	678	77.4	5.44	68	102.7	97.4	106.5	99.3	98.2	95.9	102.2	97.8	-	1.04499	0.194029
O15265	ATXN7	Ataxin-7 OS=Homo sapiens OX=9606 GN=ATXN7 PE=1 SV=1	3	2	2	2	892	95.4	9.85	66	103	102.9	100.7	94.9	94.4	104.1	102.2	97.8	-	1.04499	0.246178
P11117	ACP2	Lysosomal acid phosphatase OS=Homo sapiens OX=9606 GN=ACP2 PE=1 SV=3	16	6	12	6	423	48.3	6.74	96	106.6	99.2	100.8	100.5	97.3	95.6	102.2	97.8	-	1.04499	0.17442
Q9UM22	EPDR1	Mammalian ependymin-related protein 1 OS=Homo sapiens OX=9606 GN=EPDR1 PE=1 SV=2	15	3	8	3	224	25.4	6.6	71	114.3	99	93.3	117.7	86.7	89	102.2	97.8	-	1.04499	0.727705
P22087	FBL	rRNA 2'-O-methyltransferase fibrillarin OS=Homo sapiens OX=9606 GN=FBL PE=1 SV=2	38	14	81	14	321	33.8	10.18	1046	98.6	105	103	97.7	98.5	97.2	102.2	97.8	-	1.04499	0.0845702
P14854	COX6B1	Cytochrome c oxidase subunit 6B1 OS=Homo sapiens OX=9606 GN=COX6B1 PE=1 SV=2	67	6	18	6	86	10.2	7.05	223	96.8	109.9	99.9	95	94.9	103.5	102.2	97.8	-	1.04499	0.417624
Q00325	SLC25A3	Phosphate carrier protein, mitochondrial OS=Homo sapiens OX=9606 GN=SLC25A3 PE=1 SV=2	29	12	63	12	362	40.1	9.38	510	101.4	105	100.2	96.1	98.5	98.8	102.2	97.8	-	1.04499	0.0585029
O75251	NDUFS7	NADH dehydrogenase [ubiquinone] iron-sulfur protein 7, mitochondrial OS=Homo sapiens OX=9606 GN=NDUFS7 PE=1 SV=3	19	5	11	5	213	23.5	9.99	102	101.3	103.6	101.7	99.7	97.5	96.2	102.2	97.8	-	1.04499	0.0240573
Q8IWT6	LRRC8A	Volume-regulated anion channel subunit LRRC8A OS=Homo sapiens OX=9606 GN=LRRC8A PE=1 SV=1	9	7	8	6	810	94.1	7.94	53	98.6	100.8	107.1	93.9	94.8	104.7	102.167	97.8	-	1.04465	0.366922
Q6P2E9	EDC4	Enhancer of mRNA-decapping protein 4 OS=Homo sapiens OX=9606 GN=EDC4 PE=1 SV=1	3	4	6	4	1401	151.6	5.86	64	100.3	99.3	106.9	94.8	98	100.6	102.167	97.8	-	1.04465	0.208504
Q96PC5	MIA2	Melanoma inhibitory activity protein 2 OS=Homo sapiens OX=9606 GN=MIA2 PE=1 SV=4	13	19	38	19	1412	159.7	4.69	268	104.3	101.5	100.7	98.8	97.6	97	102.167	97.8	-	1.04465	0.022754
Q9BW91	NUDT9	ADP-ribose pyrophosphatase, mitochondrial OS=Homo sapiens OX=9606 GN=NUDT9 PE=1 SV=1	7	2	4	2	350	39.1	8.22	24	101.6	92.2	112.7	98.2	100.4	94.8	102.167	97.8	-	1.04465	0.516532
Q15020	SART3	Squamous cell carcinoma antigen recognized by T-cells 3 OS=Homo sapiens OX=9606 GN=SART3 PE=1 SV=1	14	14	20	14	963	109.9	5.57	188	98.8	105.5	102.3	98.8	97.3	97.4	102.2	97.8333	-	1.04463	0.0937524
P56589	PEX3	Peroxisomal biogenesis factor 3 OS=Homo sapiens OX=9606 GN=PEX3 PE=1 SV=1	17	5	12	5	373	42.1	8.15	137	104	103.7	98.9	96.2	97.8	99.5	102.2	97.8333	-	1.04463	0.0839075
Q92613	JADE3	Protein Jade-3 OS=Homo sapiens OX=9606 GN=JADE3 PE=1 SV=1	2	1	1	1	823	93.7	7.18	0	103.1	107.5	96	100.9	99.3	93.3	102.2	97.8333	-	1.04463	0.343859
Q9P0J0	NDUFA13	NADH dehydrogenase [ubiquinone] 1 alpha subcomplex subunit 13 OS=Homo sapiens OX=9606 GN=NDUFA13 PE=1 SV=3	35	6	20	6	144	16.7	8.43	286	102.4	105.1	99.1	96.9	97.1	99.5	102.2	97.8333	-	1.04463	0.085942
Q6NUQ4	TMEM214	Transmembrane protein 214 OS=Homo sapiens OX=9606 GN=TMEM214 PE=1 SV=2	23	15	35	15	689	77.1	9.14	312	101.4	105.5	99.7	98.9	97.6	97	102.2	97.8333	-	1.04463	0.0734032
P24941	CDK2	Cyclin-dependent kinase 2 OS=Homo sapiens OX=9606 GN=CDK2 PE=1 SV=2	34	9	16	7	298	33.9	8.68	92	96.5	102.1	107.9	100.1	97	96.4	102.167	97.8333	-	1.04429	0.281616
Q15050	RRS1	Ribosome biogenesis regulatory protein homolog OS=Homo sapiens OX=9606 GN=RRS1 PE=1 SV=2	44	17	48	17	365	41.2	10.7	859	100	106.8	99.7	99.1	96.5	97.9	102.167	97.8333	-	1.04429	0.150007
P45954	ACADSB	Short/branched chain specific acyl-CoA dehydrogenase, mitochondrial OS=Homo sapiens OX=9606 GN=ACADSB PE=1 SV=1	24	8	17	8	432	47.5	6.99	278	103	104.5	99	99.7	95	98.8	102.167	97.8333	-	1.04429	0.118215
P82673	MRPS35	28S ribosomal protein S35, mitochondrial OS=Homo sapiens OX=9606 GN=MRPS35 PE=1 SV=1	34	10	21	10	323	36.8	8.24	211	103.9	104.4	98.2	97.5	97.7	98.3	102.167	97.8333	-	1.04429	0.0965246
Q14566	MCM6	DNA replication licensing factor MCM6 OS=Homo sapiens OX=9606 GN=MCM6 PE=1 SV=1	21	17	36	17	821	92.8	5.41	375	98.8	106.7	101	95	98.6	99.9	102.167	97.8333	-	1.04429	0.193146
O15355	PPM1G	Protein phosphatase 1G OS=Homo sapiens OX=9606 GN=PPM1G PE=1 SV=1	18	7	10	7	546	59.2	4.36	98	104.8	99.3	102.4	96.4	97.4	99.7	102.167	97.8333	-	1.04429	0.0811412
Q99470	SDF2	Stromal cell-derived factor 2 OS=Homo sapiens OX=9606 GN=SDF2 PE=1 SV=2	21	5	11	5	211	23	7.33	58	102.7	104.4	99.4	99.6	96.7	97.2	102.167	97.8333	-	1.04429	0.0653156
O94901	SUN1	SUN domain-containing protein 1 OS=Homo sapiens OX=9606 GN=SUN1 PE=1 SV=3	35	22	56	21	812	90	7.08	1091	105	103.3	98.2	98	98	97.5	102.167	97.8333	-	1.04429	0.102042
P04179	SOD2	Superoxide dismutase [Mn], mitochondrial OS=Homo sapiens OX=9606 GN=SOD2 PE=1 SV=3	27	7	23	7	222	24.7	8.25	143	104.8	104.6	97.1	102.7	94.6	96.2	102.167	97.8333	-	1.04429	0.288476
Q9UI30	TRMT112	Multifunctional methyltransferase subunit TRM112-like protein OS=Homo sapiens OX=9606 GN=TRMT112 PE=1 SV=1	22	2	12	2	125	14.2	5.26	220	98.6	102.6	105.3	97.3	97.7	98.5	102.167	97.8333	-	1.04429	0.0936044
Q13724	MOGS	Mannosyl-oligosaccharide glucosidase OS=Homo sapiens OX=9606 GN=MOGS PE=1 SV=5	26	19	75	19	837	91.9	8.9	829	101.9	102.4	102.1	97.4	97.9	98.2	102.133	97.8333	-	1.04395	9.75149e-05
O14639	ABLIM1	Actin-binding LIM protein 1 OS=Homo sapiens OX=9606 GN=ABLIM1 PE=1 SV=3	12	9	10	9	778	87.6	8.59	49	101.3	97.4	107.7	99.3	98.2	96	102.133	97.8333	-	1.04395	0.24462
P09622	DLD	Dihydrolipoyl dehydrogenase, mitochondrial OS=Homo sapiens OX=9606 GN=DLD PE=1 SV=2	25	12	54	12	509	54.1	7.85	770	105	103	98.4	100.1	97.8	95.6	102.133	97.8333	-	1.04395	0.140802
P15407	FOSL1	Fos-related antigen 1 OS=Homo sapiens OX=9606 GN=FOSL1 PE=1 SV=1	3	1	1	1	271	29.4	8.02	25	97.3	106.1	103.1	92.9	97.5	103.2	102.167	97.8667	-	1.04394	0.336743
P26572	MGAT1	Alpha-1,3-mannosyl-glycoprotein 2-beta-N-acetylglucosaminyltransferase OS=Homo sapiens OX=9606 GN=MGAT1 PE=1 SV=2	11	5	8	5	445	50.8	9.16	99	100.5	101.6	104.4	100.6	97.8	95.2	102.167	97.8667	-	1.04394	0.0914217
Q9UMX3	BOK	Bcl-2-related ovarian killer protein OS=Homo sapiens OX=9606 GN=BOK PE=1 SV=1	5	1	1	1	212	23.3	9.11	19	106.5	100.8	99.2	101.1	97.1	95.4	102.167	97.8667	-	1.04394	0.19761
P17096	HMGA1	High mobility group protein HMG-I/HMG-Y OS=Homo sapiens OX=9606 GN=HMGA1 PE=1 SV=3	38	5	38	5	107	11.7	10.32	440	97.7	104.4	104.3	99.7	97.1	96.8	102.133	97.8667	-	1.0436	0.150133
Q16134	ETFDH	Electron transfer flavoprotein-ubiquinone oxidoreductase, mitochondrial OS=Homo sapiens OX=9606 GN=ETFDH PE=1 SV=2	25	14	29	14	617	68.5	7.55	293	105.3	101.8	99.3	98.8	96.6	98.2	102.133	97.8667	-	1.0436	0.0834754
Q8N283	ANKRD35	Ankyrin repeat domain-containing protein 35 OS=Homo sapiens OX=9606 GN=ANKRD35 PE=2 SV=2	1	1	2	1	1001	109.9	6.02	24	97.9	111	97.5	99.9	96.7	97	102.133	97.8667	-	1.0436	0.40154
P05388	RPLP0	60S acidic ribosomal protein P0 OS=Homo sapiens OX=9606 GN=RPLP0 PE=1 SV=1	43	11	54	11	317	34.3	5.97	1024	95.9	105.8	104.7	94.5	99.9	99.2	102.133	97.8667	-	1.0436	0.297124
Q5JPE7	NOMO2	Nodal modulator 2 OS=Homo sapiens OX=9606 GN=NOMO2 PE=1 SV=1	23	25	78	2	1267	139.4	5.76	1220	103.1	107.1	96.2	94.5	101.7	97.4	102.133	97.8667	-	1.0436	0.325365
P62873	GNB1	Guanine nucleotide-binding protein G(I)/G(S)/G(T) subunit beta-1 OS=Homo sapiens OX=9606 GN=GNB1 PE=1 SV=3	30	10	70	6	340	37.4	6	1108	100.3	104.1	102	100.4	95.8	97.4	102.133	97.8667	-	1.0436	0.070223
P31040	SDHA	Succinate dehydrogenase [ubiquinone] flavoprotein subunit, mitochondrial OS=Homo sapiens OX=9606 GN=SDHA PE=1 SV=2	26	15	57	15	664	72.6	7.39	638	104.8	107.3	94.3	94.8	98.2	100.6	102.133	97.8667	-	1.0436	0.379577
P80723	BASP1	Brain acid soluble protein 1 OS=Homo sapiens OX=9606 GN=BASP1 PE=1 SV=2	92	18	112	18	227	22.7	4.63	2026	101.4	106.6	98.4	96.9	100.2	96.5	102.133	97.8667	-	1.0436	0.184876
O95168	NDUFB4	NADH dehydrogenase [ubiquinone] 1 beta subcomplex subunit 4 OS=Homo sapiens OX=9606 GN=NDUFB4 PE=1 SV=3	31	4	15	4	129	15.2	9.85	341	102	100.8	103.6	95.5	98.3	99.8	102.133	97.8667	-	1.0436	0.0465246
Q16822	PCK2	Phosphoenolpyruvate carboxykinase [GTP], mitochondrial OS=Homo sapiens OX=9606 GN=PCK2 PE=1 SV=4	37	20	60	20	640	70.7	7.62	812	105.7	100.1	100.6	98.1	96.7	98.8	102.133	97.8667	-	1.0436	0.0872285
P09960	LTA4H	Leukotriene A-4 hydrolase OS=Homo sapiens OX=9606 GN=LTA4H PE=1 SV=2	11	7	9	7	611	69.2	6.18	52	100.9	101.8	103.7	95.9	94.6	103.1	102.133	97.8667	-	1.0436	0.198235
Q8TDR2	STK35	Serine/threonine-protein kinase 35 OS=Homo sapiens OX=9606 GN=STK35 PE=1 SV=2	1	1	1	1	534	58	9.74	0	100	107.1	99.3	100.1	95.1	98.4	102.133	97.8667	-	1.0436	0.21412
Q9BYD3	MRPL4	39S ribosomal protein L4, mitochondrial OS=Homo sapiens OX=9606 GN=MRPL4 PE=1 SV=1	18	4	9	4	311	34.9	9.72	126	102.5	99.7	104.1	95.8	101.6	96.2	102.1	97.8667	-	1.04326	0.135577
Q8N5M9	JAGN1	Protein jagunal homolog 1 OS=Homo sapiens OX=9606 GN=JAGN1 PE=1 SV=1	13	2	7	2	183	21.1	9.73	205	104.2	101.9	100.2	102.9	92.9	97.8	102.1	97.8667	-	1.04326	0.245202
Q96MU7	YTHDC1	YTH domain-containing protein 1 OS=Homo sapiens OX=9606 GN=YTHDC1 PE=1 SV=3	7	5	9	5	727	84.6	6.23	103	99.7	104.9	101.7	98	97.2	98.4	102.1	97.8667	-	1.04326	0.0528481
Q9NQS7	INCENP	Inner centromere protein OS=Homo sapiens OX=9606 GN=INCENP PE=1 SV=3	18	16	26	16	918	105.4	9.44	236	97.3	104.8	104.2	102.5	95.2	95.9	102.1	97.8667	-	1.04326	0.274523
Q9Y5J1	UTP18	U3 small nucleolar RNA-associated protein 18 homolog OS=Homo sapiens OX=9606 GN=UTP18 PE=1 SV=3	16	7	11	7	556	62	8.76	173	100.3	105.6	100.4	95.5	99	99.1	102.1	97.8667	-	1.04326	0.115648
O14880	MGST3	Microsomal glutathione S-transferase 3 OS=Homo sapiens OX=9606 GN=MGST3 PE=1 SV=1	5	1	5	1	152	16.5	9.38	54	103	103.7	99.6	100.7	101.6	91.3	102.1	97.8667	-	1.04326	0.29645
Q12792	TWF1	Twinfilin-1 OS=Homo sapiens OX=9606 GN=TWF1 PE=1 SV=3	10	3	10	3	350	40.3	6.96	137	105.8	97.6	103	96.4	96.3	101	102.133	97.9	-	1.04324	0.213265
Q9Y624	F11R	Junctional adhesion molecule A OS=Homo sapiens OX=9606 GN=F11R PE=1 SV=1	35	9	15	9	299	32.6	7.9	263	105.5	101.3	99.6	99.9	97.3	96.5	102.133	97.9	-	1.04324	0.105586
P50336	PPOX	Protoporphyrinogen oxidase OS=Homo sapiens OX=9606 GN=PPOX PE=1 SV=1	14	6	6	6	477	50.7	8.16	85	100.5	106.4	99.5	99.9	95.3	98.5	102.133	97.9	-	1.04324	0.171845
P13747	HLA-E	HLA class I histocompatibility antigen, alpha chain E OS=Homo sapiens OX=9606 GN=HLA-E PE=1 SV=4	8	2	6	1	358	40	5.83	67	103	102.3	101.1	98.3	98.1	97.3	102.133	97.9	-	1.04324	0.00260481
Q01844	EWSR1	RNA-binding protein EWS OS=Homo sapiens OX=9606 GN=EWSR1 PE=1 SV=1	14	7	38	7	656	68.4	9.33	462	99.8	105.2	101.4	98.4	97.4	97.9	102.133	97.9	-	1.04324	0.0599467
Q13888	GTF2H2	General transcription factor IIH subunit 2 OS=Homo sapiens OX=9606 GN=GTF2H2 PE=1 SV=1	5	2	4	2	395	44.4	6.76	49	102.9	104.1	99.3	97.8	97.1	98.8	102.1	97.9	-	1.0429	0.0510873
Q92620	DHX38	Pre-mRNA-splicing factor ATP-dependent RNA helicase PRP16 OS=Homo sapiens OX=9606 GN=DHX38 PE=1 SV=2	1	1	1	1	1227	140.4	6.54	0	99.5	102.1	104.7	97.5	97.9	98.3	102.1	97.9	-	1.0429	0.0505692
O43583	DENR	Density-regulated protein OS=Homo sapiens OX=9606 GN=DENR PE=1 SV=2	25	4	7	4	198	22.1	5.3	165	103.3	89.5	113.5	90.4	100.5	102.8	102.1	97.9	-	1.0429	0.624341
P51798	CLCN7	H(+)/Cl(-) exchange transporter 7 OS=Homo sapiens OX=9606 GN=CLCN7 PE=1 SV=2	8	7	17	7	805	88.6	8.43	247	100.8	100.7	104.8	98.4	97.6	97.7	102.1	97.9	-	1.0429	0.0377414
P51970	NDUFA8	NADH dehydrogenase [ubiquinone] 1 alpha subcomplex subunit 8 OS=Homo sapiens OX=9606 GN=NDUFA8 PE=1 SV=3	33	5	13	5	172	20.1	7.65	70	103	103.5	99.8	98.2	97.1	98.4	102.1	97.9	-	1.0429	0.0267387
P23786	CPT2	Carnitine O-palmitoyltransferase 2, mitochondrial OS=Homo sapiens OX=9606 GN=CPT2 PE=1 SV=2	32	18	39	18	658	73.7	8.18	608	105.3	101.8	99.2	97.8	98	97.9	102.1	97.9	-	1.0429	0.0763834
P04004	VTN	Vitronectin OS=Homo sapiens OX=9606 GN=VTN PE=1 SV=1	3	1	9	1	478	54.3	5.8	322	109.9	84.1	112.3	91.8	100	101.9	102.1	97.9	-	1.0429	0.682615
P26599	PTBP1	Polypyrimidine tract-binding protein 1 OS=Homo sapiens OX=9606 GN=PTBP1 PE=1 SV=1	16	8	48	5	531	57.2	9.17	564	102.1	101.8	102.4	98.6	96	99.1	102.1	97.9	-	1.0429	0.0126299
Q32M84	BTBD16	BTB/POZ domain-containing protein 16 OS=Homo sapiens OX=9606 GN=BTBD16 PE=2 SV=2	2	1	1	1	506	58.4	9.2	0	112.7	104.2	89.4	104.7	89.9	99.1	102.1	97.9	-	1.0429	0.629803
P29083	GTF2E1	General transcription factor IIE subunit 1 OS=Homo sapiens OX=9606 GN=GTF2E1 PE=1 SV=2	5	3	4	3	439	49.4	4.82	21	102.6	104.6	99.1	94.6	96.7	102.4	102.1	97.9	-	1.0429	0.212048
O43707	ACTN4	Alpha-actinin-4 OS=Homo sapiens OX=9606 GN=ACTN4 PE=1 SV=2	60	54	489	39	911	104.8	5.44	8309	99.4	104.3	102.6	99.2	96.6	97.9	102.1	97.9	-	1.0429	0.0605897
P01042	KNG1	Kininogen-1 OS=Homo sapiens OX=9606 GN=KNG1 PE=1 SV=2	1	1	1	1	644	71.9	6.81	0	109.6	94.8	101.8	87.3	100.8	105.6	102.067	97.9	-	1.04256	0.581051
Q3SY69	ALDH1L2	Mitochondrial 10-formyltetrahydrofolate dehydrogenase OS=Homo sapiens OX=9606 GN=ALDH1L2 PE=1 SV=2	21	17	25	17	923	101.7	6.52	244	103.5	103.2	99.5	100.4	95.5	97.8	102.067	97.9	-	1.04256	0.0948915
Q9UIF9	BAZ2A	Bromodomain adjacent to zinc finger domain protein 2A OS=Homo sapiens OX=9606 GN=BAZ2A PE=1 SV=4	10	16	20	16	1905	211.1	6.64	161	101.1	100.3	104.8	96.3	97.5	99.9	102.067	97.9	-	1.04256	0.0752241
P09110	ACAA1	3-ketoacyl-CoA thiolase, peroxisomal OS=Homo sapiens OX=9606 GN=ACAA1 PE=1 SV=2	31	8	17	8	424	44.3	8.44	302	101.9	104.5	99.8	98.9	97.7	97.1	102.067	97.9	-	1.04256	0.0460947
P47756	CAPZB	F-actin-capping protein subunit beta OS=Homo sapiens OX=9606 GN=CAPZB PE=1 SV=4	39	10	28	10	277	31.3	5.59	251	102.8	103.8	99.6	102	95.3	96.4	102.067	97.9	-	1.04256	0.161633
Q96F86	EDC3	Enhancer of mRNA-decapping protein 3 OS=Homo sapiens OX=9606 GN=EDC3 PE=1 SV=1	5	3	4	3	508	56	7.11	47	99.7	100.9	105.6	94.7	99	100.1	102.067	97.9333	-	1.04221	0.165571
Q9Y6A9	SPCS1	Signal peptidase complex subunit 1 OS=Homo sapiens OX=9606 GN=SPCS1 PE=1 SV=5	10	2	2	2	169	18.3	8.72	25	102.4	105.7	98.1	96.7	103.4	93.7	102.067	97.9333	-	1.04221	0.316563
Q9NVV0	TMEM38B	Trimeric intracellular cation channel type B OS=Homo sapiens OX=9606 GN=TMEM38B PE=1 SV=1	12	3	9	3	291	32.5	9.06	40	102.2	105.4	98.6	100.6	96.4	96.8	102.067	97.9333	-	1.04221	0.157007
O75382	TRIM3	Tripartite motif-containing protein 3 OS=Homo sapiens OX=9606 GN=TRIM3 PE=1 SV=2	3	2	2	2	744	80.8	7.83	23	97.9	104.8	103.5	94.1	101.8	97.9	102.067	97.9333	-	1.04221	0.249364
Q86XP3	DDX42	ATP-dependent RNA helicase DDX42 OS=Homo sapiens OX=9606 GN=DDX42 PE=1 SV=1	15	12	26	12	938	102.9	7.02	242	96.4	103.8	106	97.6	97	99.2	102.067	97.9333	-	1.04221	0.23732
Q9Y5H5	PCDHA9	Protocadherin alpha-9 OS=Homo sapiens OX=9606 GN=PCDHA9 PE=2 SV=1	1	1	2	1	950	102.3	5.07	0	102.1	99.3	104.8	99.2	97.2	97.4	102.067	97.9333	-	1.04221	0.0730349
Q8TDD1	DDX54	ATP-dependent RNA helicase DDX54 OS=Homo sapiens OX=9606 GN=DDX54 PE=1 SV=2	14	13	28	12	881	98.5	10.02	186	97.4	102.3	106.5	98.9	97.9	97	102.067	97.9333	-	1.04221	0.198697
Q9Y3A5	SBDS	Ribosome maturation protein SBDS OS=Homo sapiens OX=9606 GN=SBDS PE=1 SV=4	25	6	13	6	250	28.7	8.75	94	103.4	103.5	99.3	94.6	99.2	100	102.067	97.9333	-	1.04221	0.130631
Q8N2H4	SYS1	Protein SYS1 homolog OS=Homo sapiens OX=9606 GN=SYS1 PE=1 SV=1	6	1	3	1	156	17.6	7.72	54	109.1	98.8	98.3	98.5	97.4	97.9	102.067	97.9333	-	1.04221	0.307099
O15061	SYNM	Synemin OS=Homo sapiens OX=9606 GN=SYNM PE=1 SV=2	23	35	71	35	1565	172.7	5.16	1049	104.9	101.8	99.5	100	98.1	95.7	102.067	97.9333	-	1.04221	0.107496
Q0VGL1	LAMTOR4	Ragulator complex protein LAMTOR4 OS=Homo sapiens OX=9606 GN=LAMTOR4 PE=1 SV=1	17	2	3	2	99	10.7	6.54	26	104	101.9	100.3	102.6	97.7	93.5	102.067	97.9333	-	1.04221	0.21918
Q16630	CPSF6	Cleavage and polyadenylation specificity factor subunit 6 OS=Homo sapiens OX=9606 GN=CPSF6 PE=1 SV=2	23	11	31	11	551	59.2	7.15	543	97.7	103.2	105.3	98.7	97.4	97.7	102.067	97.9333	-	1.04221	0.1467
O75179	ANKRD17	Ankyrin repeat domain-containing protein 17 OS=Homo sapiens OX=9606 GN=ANKRD17 PE=1 SV=3	2	4	7	1	2603	274.1	6.52	107	102.6	100.2	103.5	91.2	101.6	101.1	102.1	97.9667	-	1.04219	0.306237
P10606	COX5B	Cytochrome c oxidase subunit 5B, mitochondrial OS=Homo sapiens OX=9606 GN=COX5B PE=1 SV=2	40	6	30	6	129	13.7	8.81	282	101.5	105	99.6	101.2	93.8	98.8	102.033	97.9333	-	1.04187	0.202552
P49005	POLD2	DNA polymerase delta subunit 2 OS=Homo sapiens OX=9606 GN=POLD2 PE=1 SV=1	3	1	1	1	469	51.3	5.58	26	106.2	106.9	93	102.9	94.3	96.6	102.033	97.9333	-	1.04187	0.474596
Q69YN2	CWF19L1	CWF19-like protein 1 OS=Homo sapiens OX=9606 GN=CWF19L1 PE=1 SV=2	7	3	3	3	538	60.6	7.24	54	98.2	97	110.9	89.9	101.5	102.4	102.033	97.9333	-	1.04187	0.531792
Q9GZR2	REXO4	RNA exonuclease 4 OS=Homo sapiens OX=9606 GN=REXO4 PE=1 SV=2	10	5	9	5	422	46.6	9.77	115	103.7	103.1	99.3	96.7	98.8	98.3	102.033	97.9333	-	1.04187	0.0538644
Q9BRJ6	C7orf50	Uncharacterized protein C7orf50 OS=Homo sapiens OX=9606 GN=C7orf50 PE=1 SV=1	35	4	10	4	194	22.1	9.64	162	96.5	105.3	104.4	98.1	97.8	98	102.067	97.9667	-	1.04185	0.216541
P32856	STX2	Syntaxin-2 OS=Homo sapiens OX=9606 GN=STX2 PE=1 SV=3	3	1	2	1	288	33.3	6.28	0	100.7	97.5	108	92.1	101.7	100.1	102.067	97.9667	-	1.04185	0.394131
Q4G0J3	LARP7	La-related protein 7 OS=Homo sapiens OX=9606 GN=LARP7 PE=1 SV=1	14	8	13	8	582	66.9	9.55	62	102.2	103.8	100.2	98.9	96.4	98.6	102.067	97.9667	-	1.04185	0.0348668
Q66PJ3	ARL6IP4	ADP-ribosylation factor-like protein 6-interacting protein 4 OS=Homo sapiens OX=9606 GN=ARL6IP4 PE=1 SV=2	7	2	2	2	421	44.9	10.93	54	99.9	99.8	106.5	94.2	101.2	98.5	102.067	97.9667	-	1.04185	0.245009
Q07617	SPAG1	Sperm-associated antigen 1 OS=Homo sapiens OX=9606 GN=SPAG1 PE=1 SV=3	4	3	4	3	926	103.6	6.86	81	105.6	96	104.6	98.8	97	98.1	102.067	97.9667	-	1.04185	0.255457
Q96E39	RBMXL1	RNA binding motif protein, X-linked-like-1 OS=Homo sapiens OX=9606 GN=RBMXL1 PE=1 SV=1	39	18	72	2	390	42.1	9.89	993	97	95.4	113.8	101.8	94.8	97.3	102.067	97.9667	-	1.04185	0.546481
Q9UIJ7	AK3	GTP:AMP phosphotransferase AK3, mitochondrial OS=Homo sapiens OX=9606 GN=AK3 PE=1 SV=4	59	14	36	14	227	25.6	9.16	363	103.5	102.7	99.9	98.9	97.6	97.4	102.033	97.9667	-	1.04151	0.0267297
Q8NBM8	PCYOX1L	Prenylcysteine oxidase-like OS=Homo sapiens OX=9606 GN=PCYOX1L PE=1 SV=2	3	2	3	2	494	54.6	7.31	0	106.5	100.9	98.7	97.3	102.2	94.4	102.033	97.9667	-	1.04151	0.279207
Q86Y82	STX12	Syntaxin-12 OS=Homo sapiens OX=9606 GN=STX12 PE=1 SV=1	31	7	15	7	276	31.6	5.59	261	100.9	106.7	98.5	102.8	95.1	96	102.033	97.9667	-	1.04151	0.302588
Q8WWX9	SELENOM	Selenoprotein M OS=Homo sapiens OX=9606 GN=SELENOM PE=1 SV=3	10	1	1	1	145	16.2	5.54	31	103.1	94.4	108.6	97.6	101.4	94.9	102.033	97.9667	-	1.04151	0.421339
O75616	ERAL1	GTPase Era, mitochondrial OS=Homo sapiens OX=9606 GN=ERAL1 PE=1 SV=2	16	5	13	5	437	48.3	8.84	238	105.2	103.2	97.7	98.7	97.7	97.5	102.033	97.9667	-	1.04151	0.148073
P41273	TNFSF9	Tumor necrosis factor ligand superfamily member 9 OS=Homo sapiens OX=9606 GN=TNFSF9 PE=1 SV=1	7	1	1	1	254	26.6	7.02	28	100.7	103.8	101.6	92.5	90.1	111.3	102.033	97.9667	-	1.04151	0.580184
P55795	HNRNPH2	Heterogeneous nuclear ribonucleoprotein H2 OS=Homo sapiens OX=9606 GN=HNRNPH2 PE=1 SV=1	33	12	72	5	449	49.2	6.3	1059	100.4	103.6	102.1	97	97.9	99	102.033	97.9667	-	1.04151	0.0203031
P05556	ITGB1	Integrin beta-1 OS=Homo sapiens OX=9606 GN=ITGB1 PE=1 SV=2	29	23	156	23	798	88.4	5.39	2444	104.6	103.7	97.8	103	96.3	94.6	102.033	97.9667	-	1.04151	0.289681
Q8IWL3	HSCB	Iron-sulfur cluster co-chaperone protein HscB OS=Homo sapiens OX=9606 GN=HSCB PE=1 SV=3	14	4	4	4	235	27.4	7.69	41	109.4	92.2	104.6	98.3	98	97.7	102.067	98	-	1.0415	0.472077
Q9NRZ9	HELLS	Lymphoid-specific helicase OS=Homo sapiens OX=9606 GN=HELLS PE=1 SV=1	10	9	14	9	838	97	7.93	122	100	104.7	101.5	100.7	97.5	95.8	102.067	98	-	1.0415	0.111285
O43934	MFSD11	UNC93-like protein MFSD11 OS=Homo sapiens OX=9606 GN=MFSD11 PE=2 SV=2	2	1	1	1	449	49.2	5.68	20	98.5	108.5	99	97.3	96.7	99.9	102	97.9667	-	1.04117	0.300939
P49757	NUMB	Protein numb homolog OS=Homo sapiens OX=9606 GN=NUMB PE=1 SV=2	12	7	12	7	651	70.8	8.51	89	102.6	102.6	100.8	101.7	96	96.2	102	97.9667	-	1.04117	0.108925
P46781	RPS9	40S ribosomal protein S9 OS=Homo sapiens OX=9606 GN=RPS9 PE=1 SV=3	52	13	52	13	194	22.6	10.65	322	98.6	105.2	102.2	94.8	99.3	99.8	102	97.9667	-	1.04117	0.179688
Q15717	ELAVL1	ELAV-like protein 1 OS=Homo sapiens OX=9606 GN=ELAVL1 PE=1 SV=2	22	7	30	7	326	36.1	9.17	393	100.9	104	101.1	98.7	97.2	98	102	97.9667	-	1.04117	0.0209154
Q8N2K1	UBE2J2	Ubiquitin-conjugating enzyme E2 J2 OS=Homo sapiens OX=9606 GN=UBE2J2 PE=1 SV=3	11	2	3	2	259	28.9	8.4	80	102.7	105.7	97.7	97.3	100.2	96.5	102.033	98	-	1.04116	0.194391
Q9NQ84	GPRC5C	G-protein coupled receptor family C group 5 member C OS=Homo sapiens OX=9606 GN=GPRC5C PE=1 SV=2	3	1	2	1	441	48.2	8.43	67	104.4	99.3	102.4	101.7	90	102.3	102.033	98	-	1.04116	0.39834
Q96HA4	C1orf159	Uncharacterized protein C1orf159 OS=Homo sapiens OX=9606 GN=C1orf159 PE=2 SV=2	3	1	2	1	380	40.3	10.01	27	93.9	115.9	96.3	84.8	85.6	123.6	102.033	98	-	1.04116	0.795705
Q9H583	HEATR1	HEAT repeat-containing protein 1 OS=Homo sapiens OX=9606 GN=HEATR1 PE=1 SV=3	18	35	81	35	2144	242.2	6.54	782	102.7	102.5	100.9	95.6	98.8	99.6	102.033	98	-	1.04116	0.0402771
Q9HBL7	PLGRKT	Plasminogen receptor (KT) OS=Homo sapiens OX=9606 GN=PLGRKT PE=1 SV=1	18	3	6	3	147	17.2	9.58	86	101.5	105	99.5	103.6	94	96.4	102	98	-	1.04082	0.292419
Q96QR8	PURB	Transcriptional activator protein Pur-beta OS=Homo sapiens OX=9606 GN=PURB PE=1 SV=3	14	4	5	4	312	33.2	5.43	116	98.5	97.6	109.9	93.8	99.5	100.7	102	98	-	1.04082	0.423763
Q7Z769	SLC35E3	Solute carrier family 35 member E3 OS=Homo sapiens OX=9606 GN=SLC35E3 PE=2 SV=1	2	1	1	1	313	35	9.16	42	104.7	103.5	97.8	96.9	96.2	100.9	102	98	-	1.04082	0.19644
O94842	TOX4	TOX high mobility group box family member 4 OS=Homo sapiens OX=9606 GN=TOX4 PE=1 SV=1	17	8	10	8	621	66.2	5.06	157	100.1	98	107.9	96.2	98.4	99.4	102	98	-	1.04082	0.273826
Q9UJJ9	GNPTG	N-acetylglucosamine-1-phosphotransferase subunit gamma OS=Homo sapiens OX=9606 GN=GNPTG PE=1 SV=1	3	1	1	1	305	34	6.95	48	106	100.4	99.6	101.6	97.8	94.6	102	98	-	1.04082	0.233706
Q08722	CD47	Leukocyte surface antigen CD47 OS=Homo sapiens OX=9606 GN=CD47 PE=1 SV=1	11	4	12	4	323	35.2	7.21	140	106.6	102.2	97.2	101.8	97.1	95.1	102	98	-	1.04082	0.300181
Q15287	RNPS1	RNA-binding protein with serine-rich domain 1 OS=Homo sapiens OX=9606 GN=RNPS1 PE=1 SV=1	11	3	10	3	305	34.2	11.84	256	97.9	105.7	102.4	98.8	98	97.2	102	98	-	1.04082	0.158002
Q5VUM1	SDHAF4	Succinate dehydrogenase assembly factor 4, mitochondrial OS=Homo sapiens OX=9606 GN=SDHAF4 PE=3 SV=1	15	1	1	1	108	12.2	9.36	0	102.5	98.2	105.2	95.5	102	96.5	101.967	98	-	1.04048	0.239124
Q6YP21	KYAT3	Kynurenine--oxoglutarate transaminase 3 OS=Homo sapiens OX=9606 GN=KYAT3 PE=1 SV=1	14	5	8	5	454	51.4	8.19	135	105.1	99.9	100.9	99.5	100.1	94.4	101.967	98	-	1.04048	0.175116
P08582	MELTF	Melanotransferrin OS=Homo sapiens OX=9606 GN=MELTF PE=1 SV=2	16	9	12	9	738	80.2	5.94	119	106.1	101.6	98.2	103.8	94	96.2	101.967	98	-	1.04048	0.349582
O43159	RRP8	Ribosomal RNA-processing protein 8 OS=Homo sapiens OX=9606 GN=RRP8 PE=1 SV=2	23	8	12	8	456	50.7	9.42	104	101.1	102	102.9	102.6	96.9	94.6	102	98.0333	-	1.04046	0.178503
Q4G148	GXYLT1	Glucoside xylosyltransferase 1 OS=Homo sapiens OX=9606 GN=GXYLT1 PE=1 SV=2	8	3	7	3	440	50.5	8.65	100	107.3	98.2	100.5	97.2	99.9	97	102	98.0333	-	1.04046	0.241485
Q96AE4	FUBP1	Far upstream element-binding protein 1 OS=Homo sapiens OX=9606 GN=FUBP1 PE=1 SV=3	38	24	93	20	644	67.5	7.61	1013	100.2	104.4	101.3	98.4	98.3	97.4	101.967	98.0333	-	1.04012	0.0386807
P62277	RPS13	40S ribosomal protein S13 OS=Homo sapiens OX=9606 GN=RPS13 PE=1 SV=2	60	11	57	11	151	17.2	10.54	454	97.8	104.8	103.3	97.1	99.3	97.7	101.967	98.0333	-	1.04012	0.152092
P09669	COX6C	Cytochrome c oxidase subunit 6C OS=Homo sapiens OX=9606 GN=COX6C PE=1 SV=2	36	3	8	3	75	8.8	10.39	46	99.8	103.7	102.4	103.3	96.6	94.2	101.967	98.0333	-	1.04012	0.253892
Q9BRQ6	CHCHD6	MICOS complex subunit MIC25 OS=Homo sapiens OX=9606 GN=CHCHD6 PE=1 SV=1	35	7	15	7	235	26.4	8.85	111	102.8	101.5	101.6	101.6	96.8	95.7	101.967	98.0333	-	1.04012	0.101807
O15260	SURF4	Surfeit locus protein 4 OS=Homo sapiens OX=9606 GN=SURF4 PE=1 SV=3	20	5	15	5	269	30.4	7.78	93	102.5	102.6	100.8	96.6	98.1	99.4	101.967	98.0333	-	1.04012	0.0169298
Q96GC5	MRPL48	39S ribosomal protein L48, mitochondrial OS=Homo sapiens OX=9606 GN=MRPL48 PE=1 SV=2	26	6	13	6	212	23.9	8.98	133	101.9	104	100	101.6	94	98.5	101.967	98.0333	-	1.04012	0.189396
Q9ULW0	TPX2	Targeting protein for Xklp2 OS=Homo sapiens OX=9606 GN=TPX2 PE=1 SV=2	42	32	84	32	747	85.6	9.23	788	101.8	106.8	97.3	103.7	95.9	94.5	101.967	98.0333	-	1.04012	0.377312
P08195	SLC3A2	4F2 cell-surface antigen heavy chain OS=Homo sapiens OX=9606 GN=SLC3A2 PE=1 SV=3	33	21	115	21	630	68	5.01	2002	101.3	103.6	101	98.6	97.1	98.4	101.967	98.0333	-	1.04012	0.0141868
Q9UGM6	WARS2	Tryptophan--tRNA ligase, mitochondrial OS=Homo sapiens OX=9606 GN=WARS2 PE=1 SV=1	15	5	7	5	360	40.1	9.28	45	99.6	107.5	98.8	102.4	96.2	95.5	101.967	98.0333	-	1.04012	0.328532
Q9BTZ2	DHRS4	Dehydrogenase/reductase SDR family member 4 OS=Homo sapiens OX=9606 GN=DHRS4 PE=1 SV=3	22	7	14	7	278	29.5	8.56	74	105.3	100	100.6	95	99.9	99.2	101.967	98.0333	-	1.04012	0.158049
O60739	EIF1B	Eukaryotic translation initiation factor 1b OS=Homo sapiens OX=9606 GN=EIF1B PE=1 SV=2	27	3	5	3	113	12.8	7.37	31	109	96.6	100.3	99.8	97	97.3	101.967	98.0333	-	1.04012	0.356944
Q9BT40	INPP5K	Inositol polyphosphate 5-phosphatase K OS=Homo sapiens OX=9606 GN=INPP5K PE=1 SV=3	9	4	7	4	448	51.1	6.54	87	99.5	102.9	103.5	99.2	97	97.9	101.967	98.0333	-	1.04012	0.0483012
Q01130	SRSF2	Serine/arginine-rich splicing factor 2 OS=Homo sapiens OX=9606 GN=SRSF2 PE=1 SV=4	25	5	29	3	221	25.5	11.85	509	96.7	104.2	105	96.9	97.6	99.6	101.967	98.0333	-	1.04012	0.227868
P82932	MRPS6	28S ribosomal protein S6, mitochondrial OS=Homo sapiens OX=9606 GN=MRPS6 PE=1 SV=3	47	6	24	6	125	14.2	9.26	210	103	104.1	98.9	98.8	96	99.4	102	98.0667	-	1.04011	0.106899
Q9NRZ7	AGPAT3	1-acyl-sn-glycerol-3-phosphate acyltransferase gamma OS=Homo sapiens OX=9606 GN=AGPAT3 PE=1 SV=1	6	2	4	2	376	43.4	8.72	49	102	102.6	101.4	96.7	98	99.5	102	98.0667	-	1.04011	0.0110784
Q9HAS0	C17orf75	Protein Njmu-R1 OS=Homo sapiens OX=9606 GN=C17orf75 PE=1 SV=2	3	1	2	1	396	44.6	5.03	0	99.9	100.6	105.3	92.2	96.2	105.7	101.933	98.0333	-	1.03978	0.420411
O60884	DNAJA2	DnaJ homolog subfamily A member 2 OS=Homo sapiens OX=9606 GN=DNAJA2 PE=1 SV=1	16	7	16	7	412	45.7	6.48	80	102.2	104.6	99	97.2	96.5	100.4	101.933	98.0333	-	1.03978	0.125435
Q2QL34	MPV17L	Mpv17-like protein OS=Homo sapiens OX=9606 GN=MPV17L PE=1 SV=1	9	2	2	2	196	22.1	9.89	24	102.7	100.9	102.3	97.2	99.1	97.9	101.967	98.0667	-	1.03977	0.00742859
P11233	RALA	Ras-related protein Ral-A OS=Homo sapiens OX=9606 GN=RALA PE=1 SV=1	31	6	22	4	206	23.6	7.11	275	100.8	105.7	99.4	98.9	96.8	98.5	101.967	98.0667	-	1.03977	0.125093
P36578	RPL4	60S ribosomal protein L4 OS=Homo sapiens OX=9606 GN=RPL4 PE=1 SV=5	40	18	84	18	427	47.7	11.06	1355	95.1	104.2	106.6	96	100.5	97.7	101.967	98.0667	-	1.03977	0.355944
Q15061	WDR43	WD repeat-containing protein 43 OS=Homo sapiens OX=9606 GN=WDR43 PE=1 SV=3	14	12	27	12	677	74.8	5.57	179	102.2	106.2	97.5	98.5	98	97.7	101.967	98.0667	-	1.03977	0.197337
O14929	HAT1	Histone acetyltransferase type B catalytic subunit OS=Homo sapiens OX=9606 GN=HAT1 PE=1 SV=1	17	6	10	6	419	49.5	5.69	131	97.3	90.9	117.7	94.7	100.7	98.8	101.967	98.0667	-	1.03977	0.661885
O60870	KIN	DNA/RNA-binding protein KIN17 OS=Homo sapiens OX=9606 GN=KIN PE=1 SV=2	9	3	3	3	393	45.3	8.95	21	102.9	98.9	104.1	94.8	98.2	101.2	101.967	98.0667	-	1.03977	0.183306
Q9NY35	CLDND1	Claudin domain-containing protein 1 OS=Homo sapiens OX=9606 GN=CLDND1 PE=1 SV=1	18	4	6	4	253	28.6	5.82	89	103.7	99.2	102.9	97.6	99.5	97.1	101.933	98.0667	-	1.03943	0.0691301
P55072	VCP	Transitional endoplasmic reticulum ATPase OS=Homo sapiens OX=9606 GN=VCP PE=1 SV=4	61	44	178	44	806	89.3	5.26	3090	104.7	98.8	102.3	97.8	96.4	100	101.933	98.0667	-	1.03943	0.126455
O95490	ADGRL2	Adhesion G protein-coupled receptor L2 OS=Homo sapiens OX=9606 GN=ADGRL2 PE=1 SV=2	5	7	7	7	1459	163.2	6.43	69	100	102	103.8	97.8	96.7	99.7	101.933	98.0667	-	1.03943	0.0511988
Q9NR28	DIABLO	Diablo homolog, mitochondrial OS=Homo sapiens OX=9606 GN=DIABLO PE=1 SV=1	14	3	9	3	239	27.1	5.9	115	89.5	107.4	108.9	85.9	103.2	105.1	101.933	98.0667	-	1.03943	0.680588
O15381	NVL	Nuclear valosin-containing protein-like OS=Homo sapiens OX=9606 GN=NVL PE=1 SV=1	16	12	17	12	856	95	6.48	131	100	102.9	102.9	97.7	97.9	98.6	101.933	98.0667	-	1.03943	0.0183089
P57678	GEMIN4	Gem-associated protein 4 OS=Homo sapiens OX=9606 GN=GEMIN4 PE=1 SV=2	4	4	5	4	1058	120	6.04	44	97.1	103.1	105.6	94.2	99.3	100.7	101.933	98.0667	-	1.03943	0.293918
Q9H9Y6	POLR1B	DNA-directed RNA polymerase I subunit RPA2 OS=Homo sapiens OX=9606 GN=POLR1B PE=1 SV=2	4	5	9	5	1135	128.1	7.83	83	100.7	105.7	99.4	97.9	95.7	100.6	101.933	98.0667	-	1.03943	0.180504
Q14642	INPP5A	Inositol polyphosphate-5-phosphatase A OS=Homo sapiens OX=9606 GN=INPP5A PE=1 SV=1	10	4	5	4	412	47.8	7.03	42	101.8	105.9	98.1	100	98.3	95.9	101.933	98.0667	-	1.03943	0.203641
O14641	DVL2	Segment polarity protein dishevelled homolog DVL-2 OS=Homo sapiens OX=9606 GN=DVL2 PE=1 SV=1	2	1	1	1	736	78.9	6.02	23	104.4	100.7	100.6	102.3	95.7	96.2	101.9	98.0667	-	1.03909	0.19455
Q08AM6	VAC14	Protein VAC14 homolog OS=Homo sapiens OX=9606 GN=VAC14 PE=1 SV=1	10	6	7	6	782	87.9	6.13	44	103.8	100.9	101	97.2	97.7	99.3	101.9	98.0667	-	1.03909	0.0284016
Q16576	RBBP7	Histone-binding protein RBBP7 OS=Homo sapiens OX=9606 GN=RBBP7 PE=1 SV=1	27	11	29	4	425	47.8	5.05	420	97	106.5	102.2	96.8	97.8	99.6	101.9	98.0667	-	1.03909	0.252051
Q99848	EBNA1BP2	Probable rRNA-processing protein EBP2 OS=Homo sapiens OX=9606 GN=EBNA1BP2 PE=1 SV=2	37	12	41	12	306	34.8	10.1	420	99.3	106.2	100.2	100.5	97.2	96.5	101.9	98.0667	-	1.03909	0.198842
P62166	NCS1	Neuronal calcium sensor 1 OS=Homo sapiens OX=9606 GN=NCS1 PE=1 SV=2	12	2	2	2	190	21.9	4.83	27	97.6	102	106.1	91.1	101.4	101.7	101.9	98.0667	-	1.03909	0.419277
P09132	SRP19	Signal recognition particle 19 kDa protein OS=Homo sapiens OX=9606 GN=SRP19 PE=1 SV=3	20	2	6	2	144	16.1	9.85	140	98.7	104.4	102.6	97.7	97.4	99.1	101.9	98.0667	-	1.03909	0.0952088
A1L188	NDUFAF8	NADH dehydrogenase [ubiquinone] 1 alpha subcomplex assembly factor 8 OS=Homo sapiens OX=9606 GN=NDUFAF8 PE=1 SV=1	18	1	3	1	74	7.8	9.32	93	105.2	103.7	96.8	99.1	97.7	97.4	101.9	98.0667	-	1.03909	0.219997
O60231	DHX16	Pre-mRNA-splicing factor ATP-dependent RNA helicase DHX16 OS=Homo sapiens OX=9606 GN=DHX16 PE=1 SV=2	10	11	19	10	1041	119.2	6.8	67	103.7	100.7	101.4	96.7	101.5	96.1	101.933	98.1	-	1.03908	0.118547
Q07157	TJP1	Tight junction protein ZO-1 OS=Homo sapiens OX=9606 GN=TJP1 PE=1 SV=3	22	33	57	32	1748	195.3	6.7	682	100.3	104.7	100.8	99.9	95.8	98.6	101.933	98.1	-	1.03908	0.106071
P22692	IGFBP4	Insulin-like growth factor-binding protein 4 OS=Homo sapiens OX=9606 GN=IGFBP4 PE=1 SV=2	6	1	1	1	258	27.9	7.15	0	94.4	104.8	106.6	99.1	93.7	101.5	101.933	98.1	-	1.03908	0.437318
Q05D32	CTDSPL2	CTD small phosphatase-like protein 2 OS=Homo sapiens OX=9606 GN=CTDSPL2 PE=1 SV=2	22	9	14	9	466	53	6.4	78	100.6	103.2	101.9	97.8	98.9	97.6	101.9	98.1	-	1.03874	0.0111796
Q8IY17	PNPLA6	Neuropathy target esterase OS=Homo sapiens OX=9606 GN=PNPLA6 PE=1 SV=3	15	20	30	20	1375	150.9	7.74	375	101.7	100.9	103.1	98.4	97.3	98.6	101.9	98.1	-	1.03874	0.00746904
P16220	CREB1	Cyclic AMP-responsive element-binding protein 1 OS=Homo sapiens OX=9606 GN=CREB1 PE=1 SV=2	9	3	9	3	341	36.7	5.57	70	97.8	105	102.9	102.2	96.4	95.7	101.9	98.1	-	1.03874	0.269735
Q9NVP1	DDX18	ATP-dependent RNA helicase DDX18 OS=Homo sapiens OX=9606 GN=DDX18 PE=1 SV=2	28	19	45	19	670	75.4	9.5	723	102.4	104.5	98.8	96.6	99.1	98.6	101.9	98.1	-	1.03874	0.106609
Q96AB3	ISOC2	Isochorismatase domain-containing protein 2 OS=Homo sapiens OX=9606 GN=ISOC2 PE=1 SV=1	18	2	4	2	205	22.3	7.77	104	103.8	106.5	95.4	97.5	96.9	99.9	101.9	98.1	-	1.03874	0.334439
Q9UP83	COG5	Conserved oligomeric Golgi complex subunit 5 OS=Homo sapiens OX=9606 GN=COG5 PE=1 SV=3	1	1	1	1	839	92.7	6.6	24	106.5	98	101.2	95.1	99.7	99.5	101.9	98.1	-	1.03874	0.259937
Q07955	SRSF1	Serine/arginine-rich splicing factor 1 OS=Homo sapiens OX=9606 GN=SRSF1 PE=1 SV=2	47	15	112	14	248	27.7	10.36	1249	100.6	102.8	102.3	98.3	97.8	98.2	101.9	98.1	-	1.03874	0.00511458
P06737	PYGL	Glycogen phosphorylase, liver form OS=Homo sapiens OX=9606 GN=PYGL PE=1 SV=4	8	8	14	5	847	97.1	7.17	102	102.9	99.5	103.3	99.9	96.9	97.5	101.9	98.1	-	1.03874	0.0661078
Q93050	ATP6V0A1	V-type proton ATPase 116 kDa subunit a isoform 1 OS=Homo sapiens OX=9606 GN=ATP6V0A1 PE=1 SV=3	24	18	32	17	837	96.4	6.43	336	102.1	100.9	102.7	95.8	100.7	97.8	101.9	98.1	-	1.03874	0.0664938
P35610	SOAT1	Sterol O-acyltransferase 1 OS=Homo sapiens OX=9606 GN=SOAT1 PE=1 SV=3	16	7	10	7	550	64.7	8.94	108	99.8	106.3	99.6	100.8	95.8	97.7	101.9	98.1	-	1.03874	0.223367
Q8NBJ9	SIDT2	SID1 transmembrane family member 2 OS=Homo sapiens OX=9606 GN=SIDT2 PE=1 SV=2	2	2	3	2	832	94.4	6.96	34	99.7	106.2	99.7	100.3	97.9	96.1	101.867	98.1	-	1.0384	0.20414
Q9NWU2	GID8	Glucose-induced degradation protein 8 homolog OS=Homo sapiens OX=9606 GN=GID8 PE=1 SV=1	19	3	3	3	228	26.7	4.97	111	100	106.3	99.3	95.4	98	100.9	101.867	98.1	-	1.0384	0.240429
O14966	RAB29	Ras-related protein Rab-7L1 OS=Homo sapiens OX=9606 GN=RAB29 PE=1 SV=1	28	5	10	4	203	23.1	7.18	149	101.3	102	102.3	101.2	96.8	96.3	101.867	98.1	-	1.0384	0.0762399
Q3SXM5	HSDL1	Inactive hydroxysteroid dehydrogenase-like protein 1 OS=Homo sapiens OX=9606 GN=HSDL1 PE=1 SV=3	17	6	15	6	330	37	8.72	205	102.7	102.2	100.7	96.2	99.8	98.3	101.867	98.1	-	1.0384	0.0352924
Q9UBR2	CTSZ	Cathepsin Z OS=Homo sapiens OX=9606 GN=CTSZ PE=1 SV=1	12	3	6	3	303	33.8	7.11	82	110.5	98.3	96.9	108.8	93.1	92.5	101.9	98.1333	-	1.03838	0.612412
Q92947	GCDH	Glutaryl-CoA dehydrogenase, mitochondrial OS=Homo sapiens OX=9606 GN=GCDH PE=1 SV=1	14	4	6	4	438	48.1	8.06	160	94.5	108	103.2	95.6	95.6	103.2	101.9	98.1333	-	1.03838	0.467209
Q96SB8	SMC6	Structural maintenance of chromosomes protein 6 OS=Homo sapiens OX=9606 GN=SMC6 PE=1 SV=2	4	4	7	4	1091	126.2	6.99	71	98.9	100.5	106.3	97.5	97.7	99.2	101.9	98.1333	-	1.03838	0.178471
P28838	LAP3	Cytosol aminopeptidase OS=Homo sapiens OX=9606 GN=LAP3 PE=1 SV=3	44	19	58	19	519	56.1	7.93	930	104.4	102.7	98.5	99.3	98.4	96.7	101.867	98.1333	-	1.03804	0.122587
Q9Y450	HBS1L	HBS1-like protein OS=Homo sapiens OX=9606 GN=HBS1L PE=1 SV=1	9	6	8	6	684	75.4	6.61	83	102.6	102.2	100.8	99.9	96.6	97.9	101.867	98.1333	-	1.03804	0.0277459
P33991	MCM4	DNA replication licensing factor MCM4 OS=Homo sapiens OX=9606 GN=MCM4 PE=1 SV=5	16	14	22	14	863	96.5	6.74	86	99.8	104.1	101.7	95.1	99	100.3	101.867	98.1333	-	1.03804	0.134946
Q9NVJ2	ARL8B	ADP-ribosylation factor-like protein 8B OS=Homo sapiens OX=9606 GN=ARL8B PE=1 SV=1	32	7	30	4	186	21.5	8.43	472	98	106	101.6	98.4	97.8	98.2	101.867	98.1333	-	1.03804	0.182852
P51649	ALDH5A1	Succinate-semialdehyde dehydrogenase, mitochondrial OS=Homo sapiens OX=9606 GN=ALDH5A1 PE=1 SV=2	12	6	10	6	535	57.2	8.28	115	105.4	102.2	98	101	98.6	94.8	101.867	98.1333	-	1.03804	0.253514
Q8WUD4	CCDC12	Coiled-coil domain-containing protein 12 OS=Homo sapiens OX=9606 GN=CCDC12 PE=1 SV=1	27	5	7	5	166	19.2	7.34	61	103.3	103.7	98.6	99.4	99.2	95.8	101.867	98.1333	-	1.03804	0.137014
Q16594	TAF9	Transcription initiation factor TFIID subunit 9 OS=Homo sapiens OX=9606 GN=TAF9 PE=1 SV=1	15	4	6	4	264	29	8.66	92	103.5	100.4	101.7	101.8	96.8	95.8	101.867	98.1333	-	1.03804	0.14447
P10321	HLA-C	HLA class I histocompatibility antigen, C alpha chain OS=Homo sapiens OX=9606 GN=HLA-C PE=1 SV=3	29	9	38	5	366	40.6	6.04	697	101.3	106.2	98.1	100.3	96.9	97.2	101.867	98.1333	-	1.03804	0.223495
Q9BWF3	RBM4	RNA-binding protein 4 OS=Homo sapiens OX=9606 GN=RBM4 PE=1 SV=1	40	14	39	2	364	40.3	7.08	396	103.6	101.6	100.4	108	92.1	94.3	101.867	98.1333	-	1.03804	0.501638
P30049	ATP5F1D	ATP synthase subunit delta, mitochondrial OS=Homo sapiens OX=9606 GN=ATP5F1D PE=1 SV=2	14	2	17	2	168	17.5	5.49	167	105.1	103.7	96.8	97.8	97.6	99	101.867	98.1333	-	1.03804	0.224717
P56385	ATP5ME	ATP synthase subunit e, mitochondrial OS=Homo sapiens OX=9606 GN=ATP5ME PE=1 SV=2	42	4	24	4	69	7.9	9.35	348	101.9	103	100.7	100	95.1	99.3	101.867	98.1333	-	1.03804	0.0887981
Q96NT0	CCDC115	Coiled-coil domain-containing protein 115 OS=Homo sapiens OX=9606 GN=CCDC115 PE=1 SV=1	21	3	4	3	180	19.7	6.95	114	97.1	109	99.5	96.5	98.5	99.4	101.867	98.1333	-	1.03804	0.373867
L0R6Q1	SLC35A4	SLC35A4 upstream open reading frame protein OS=Homo sapiens OX=9606 GN=SLC35A4 PE=3 SV=1	47	5	12	5	103	11.1	8.1	169	100.5	104.6	100.5	102.1	94.3	98.1	101.867	98.1667	-	1.03769	0.232827
Q8WUD1	RAB2B	Ras-related protein Rab-2B OS=Homo sapiens OX=9606 GN=RAB2B PE=1 SV=1	48	10	29	5	216	24.2	7.83	498	95.4	106.3	103.9	88.6	100.4	105.5	101.867	98.1667	-	1.03769	0.570731
P35250	RFC2	Replication factor C subunit 2 OS=Homo sapiens OX=9606 GN=RFC2 PE=1 SV=3	27	8	13	8	354	39.1	6.44	197	98.5	105.7	101.4	92.9	100.8	100.8	101.867	98.1667	-	1.03769	0.332987
Q13838	DDX39B	Spliceosome RNA helicase DDX39B OS=Homo sapiens OX=9606 GN=DDX39B PE=1 SV=1	32	13	48	5	428	49	5.67	686	94	106	105.6	95.3	97.8	101.4	101.867	98.1667	-	1.03769	0.439517
P29992	GNA11	Guanine nucleotide-binding protein subunit alpha-11 OS=Homo sapiens OX=9606 GN=GNA11 PE=1 SV=2	23	8	28	5	359	42.1	5.69	326	101	100	104.6	99	98.1	97.4	101.867	98.1667	-	1.03769	0.0657551
O60245	PCDH7	Protocadherin-7 OS=Homo sapiens OX=9606 GN=PCDH7 PE=1 SV=2	3	2	2	2	1069	116	5.19	57	100.1	100.3	105	94.9	92.5	107	101.8	98.1333	-	1.03736	0.484451
P28331	NDUFS1	NADH-ubiquinone oxidoreductase 75 kDa subunit, mitochondrial OS=Homo sapiens OX=9606 GN=NDUFS1 PE=1 SV=3	40	23	62	23	727	79.4	6.23	938	104.3	102.1	99.1	95.3	99.4	99.8	101.833	98.1667	-	1.03735	0.153167
O76061	STC2	Stanniocalcin-2 OS=Homo sapiens OX=9606 GN=STC2 PE=1 SV=1	4	1	1	1	302	33.2	7.3	30	98.7	96.2	110.6	100.2	97.4	96.9	101.833	98.1667	-	1.03735	0.466365
Q9Y5K5	UCHL5	Ubiquitin carboxyl-terminal hydrolase isozyme L5 OS=Homo sapiens OX=9606 GN=UCHL5 PE=1 SV=3	26	7	13	7	329	37.6	5.33	58	99.7	100.3	105.5	95.6	98.6	100.3	101.833	98.1667	-	1.03735	0.185749
Q9Y639	NPTN	Neuroplastin OS=Homo sapiens OX=9606 GN=NPTN PE=1 SV=2	19	7	16	7	398	44.4	7.99	120	104.7	103.6	97.2	100.4	96.3	97.8	101.833	98.1667	-	1.03735	0.235307
O95229	ZWINT	ZW10 interactor OS=Homo sapiens OX=9606 GN=ZWINT PE=1 SV=2	13	4	4	4	277	31.3	5.15	49	102.5	103.1	99.9	98	96	100.5	101.833	98.1667	-	1.03735	0.0877766
Q9Y375	NDUFAF1	Complex I intermediate-associated protein 30, mitochondrial OS=Homo sapiens OX=9606 GN=NDUFAF1 PE=1 SV=2	28	9	14	9	327	37.7	7.64	88	101.1	101.1	103.3	98.3	98	98.2	101.833	98.1667	-	1.03735	0.00768294
Q9BY89	KIAA1671	Uncharacterized protein KIAA1671 OS=Homo sapiens OX=9606 GN=KIAA1671 PE=1 SV=2	3	5	6	5	1806	196.6	8.47	44	102.4	102.9	100.2	99	98.3	97.2	101.833	98.1667	-	1.03735	0.0201569
Q9C002	NMES1	Normal mucosa of esophagus-specific gene 1 protein OS=Homo sapiens OX=9606 GN=NMES1 PE=2 SV=1	28	3	8	3	83	9.6	9.47	97	99.8	101.2	104.4	99.8	97.3	97.4	101.8	98.1667	-	1.03701	0.0840161
P52824	DGKQ	Diacylglycerol kinase theta OS=Homo sapiens OX=9606 GN=DGKQ PE=1 SV=2	1	1	1	1	942	101.1	7.49	0	99	96.5	109.9	97	95	102.5	101.8	98.1667	-	1.03701	0.481344
Q08211	DHX9	ATP-dependent RNA helicase A OS=Homo sapiens OX=9606 GN=DHX9 PE=1 SV=4	32	36	135	36	1270	140.9	6.84	2139	100.6	104.4	100.4	97.5	97.8	99.2	101.8	98.1667	-	1.03701	0.0606773
Q96HD1	CRELD1	Protein disulfide isomerase CRELD1 OS=Homo sapiens OX=9606 GN=CRELD1 PE=1 SV=3	17	6	7	6	420	45.4	4.87	160	106.1	104.1	95.3	98.3	97.9	98.4	101.833	98.2	-	1.037	0.335372
O75151	PHF2	Lysine-specific demethylase PHF2 OS=Homo sapiens OX=9606 GN=PHF2 PE=1 SV=4	3	3	3	2	1096	120.7	9.17	16	98.9	110.7	95.9	99.1	97.2	98.3	101.833	98.2	-	1.037	0.469339
Q53GA4	PHLDA2	Pleckstrin homology-like domain family A member 2 OS=Homo sapiens OX=9606 GN=PHLDA2 PE=1 SV=2	6	1	2	1	152	17.1	9.17	38	102.3	99.4	103.8	101.1	96.6	96.9	101.833	98.2	-	1.037	0.134935
O94919	ENDOD1	Endonuclease domain-containing 1 protein OS=Homo sapiens OX=9606 GN=ENDOD1 PE=1 SV=2	29	10	17	10	500	55	5.71	389	101.6	100.6	103.2	100.1	96.8	97.7	101.8	98.2	-	1.03666	0.0442142
P18583	SON	Protein SON OS=Homo sapiens OX=9606 GN=SON PE=1 SV=4	17	36	76	36	2426	263.7	5.64	774	99.7	103.3	102.4	98.4	98.2	98	101.8	98.2	-	1.03666	0.0296712
Q8N2F6	ARMC10	Armadillo repeat-containing protein 10 OS=Homo sapiens OX=9606 GN=ARMC10 PE=1 SV=1	16	5	7	5	343	37.5	6.61	40	102.5	106.9	96	98.5	96.2	99.9	101.8	98.2	-	1.03666	0.342361
P0C7P0	CISD3	CDGSH iron-sulfur domain-containing protein 3, mitochondrial OS=Homo sapiens OX=9606 GN=CISD3 PE=1 SV=1	6	1	1	1	127	14.2	10.55	20	110.1	100.9	94.4	95.5	100.5	98.6	101.8	98.2	-	1.03666	0.49343
Q9UHB9	SRP68	Signal recognition particle subunit SRP68 OS=Homo sapiens OX=9606 GN=SRP68 PE=1 SV=2	30	20	51	20	627	70.7	8.56	434	98.3	102.2	104.9	96.4	98.7	99.5	101.8	98.2	-	1.03666	0.166136
O94760	DDAH1	N(G),N(G)-dimethylarginine dimethylaminohydrolase 1 OS=Homo sapiens OX=9606 GN=DDAH1 PE=1 SV=3	16	4	5	4	285	31.1	5.81	49	95.1	99.9	110.4	93.8	100.7	100.1	101.8	98.2	-	1.03666	0.513566
Q07020	RPL18	60S ribosomal protein L18 OS=Homo sapiens OX=9606 GN=RPL18 PE=1 SV=2	37	7	32	7	188	21.6	11.72	742	96.4	105.6	103.4	95	101.3	98.3	101.8	98.2	-	1.03666	0.338832
Q99714	HSD17B10	3-hydroxyacyl-CoA dehydrogenase type-2 OS=Homo sapiens OX=9606 GN=HSD17B10 PE=1 SV=3	49	11	56	11	261	26.9	7.78	1200	103.5	102.1	99.8	99.9	97.6	97.1	101.8	98.2	-	1.03666	0.0595986
Q12830	BPTF	Nucleosome-remodeling factor subunit BPTF OS=Homo sapiens OX=9606 GN=BPTF PE=1 SV=3	2	7	10	7	3046	338.1	6.54	48	108.6	95.1	101.7	101.5	93.3	99.8	101.8	98.2	-	1.03666	0.48023
Q8IZA0	KIAA0319L	Dyslexia-associated protein KIAA0319-like protein OS=Homo sapiens OX=9606 GN=KIAA0319L PE=1 SV=2	5	5	12	5	1049	115.6	6.05	123	105.1	101	99.3	103.3	95.5	95.8	101.8	98.2	-	1.03666	0.307087
Q9HC38	GLOD4	Glyoxalase domain-containing protein 4 OS=Homo sapiens OX=9606 GN=GLOD4 PE=1 SV=1	16	5	8	5	313	34.8	5.6	56	111.1	93.6	100.7	98.2	101.7	94.7	101.8	98.2	-	1.03666	0.546311
Q9Y3D3	MRPS16	28S ribosomal protein S16, mitochondrial OS=Homo sapiens OX=9606 GN=MRPS16 PE=1 SV=1	30	4	16	4	137	15.3	9.5	131	101.2	105.2	99	99.7	100.2	94.7	101.8	98.2	-	1.03666	0.227114
Q6PK04	CCDC137	Coiled-coil domain-containing protein 137 OS=Homo sapiens OX=9606 GN=CCDC137 PE=1 SV=1	25	6	7	6	289	33.2	10.93	66	98.7	106.6	100.1	101.7	97.3	95.6	101.8	98.2	-	1.03666	0.301551
P08621	SNRNP70	U1 small nuclear ribonucleoprotein 70 kDa OS=Homo sapiens OX=9606 GN=SNRNP70 PE=1 SV=2	29	16	62	16	437	51.5	9.94	745	98.6	103.4	103.3	100.9	96.9	96.8	101.767	98.2	-	1.03632	0.161717
Q96CW1	AP2M1	AP-2 complex subunit mu OS=Homo sapiens OX=9606 GN=AP2M1 PE=1 SV=2	32	14	32	14	435	49.6	9.54	339	103	102	100.3	99.2	96	99.4	101.767	98.2	-	1.03632	0.0579818
O60925	PFDN1	Prefoldin subunit 1 OS=Homo sapiens OX=9606 GN=PFDN1 PE=1 SV=2	30	4	7	4	122	14.2	6.81	64	104.5	93.3	107.5	95	101	98.6	101.767	98.2	-	1.03632	0.486669
Q9NRP2	CMC2	COX assembly mitochondrial protein 2 homolog OS=Homo sapiens OX=9606 GN=CMC2 PE=1 SV=1	43	4	8	4	79	9.5	7.87	49	97.2	102.2	105.9	96.8	98	99.8	101.767	98.2	-	1.03632	0.252138
Q9UBC2	EPS15L1	Epidermal growth factor receptor substrate 15-like 1 OS=Homo sapiens OX=9606 GN=EPS15L1 PE=1 SV=1	13	9	11	9	864	94.2	5.11	127	100.9	98.8	105.6	96.8	97.9	99.9	101.767	98.2	-	1.03632	0.181157
Q96A65	EXOC4	Exocyst complex component 4 OS=Homo sapiens OX=9606 GN=EXOC4 PE=1 SV=1	4	4	6	4	974	110.4	6.49	31	98.8	101.6	104.9	98.2	96.9	99.5	101.767	98.2	-	1.03632	0.136163
Q8NFH5	NUP35	Nucleoporin NUP35 OS=Homo sapiens OX=9606 GN=NUP35 PE=1 SV=1	36	9	21	9	326	34.8	9.09	369	101.9	101.8	101.6	100.4	98.2	96	101.767	98.2	-	1.03632	0.048748
O75964	ATP5MG	ATP synthase subunit g, mitochondrial OS=Homo sapiens OX=9606 GN=ATP5MG PE=1 SV=3	39	4	20	4	103	11.4	9.64	264	102.5	99.9	103	97.8	96.3	100.6	101.8	98.2333	-	1.03631	0.0875713
P62070	RRAS2	Ras-related protein R-Ras2 OS=Homo sapiens OX=9606 GN=RRAS2 PE=1 SV=1	48	9	38	7	204	23.4	6.01	734	97.8	101.5	106.1	100.8	98.1	95.8	101.8	98.2333	-	1.03631	0.272002
Q96CS3	FAF2	FAS-associated factor 2 OS=Homo sapiens OX=9606 GN=FAF2 PE=1 SV=2	32	12	55	12	445	52.6	5.62	1075	101.5	105.3	98.6	99.8	98.1	96.8	101.8	98.2333	-	1.03631	0.168644
Q93096	PTP4A1	Protein tyrosine phosphatase type IVA 1 OS=Homo sapiens OX=9606 GN=PTP4A1 PE=1 SV=2	25	4	12	4	173	19.8	8.97	85	103.6	103.9	97.9	97	99.1	98.6	101.8	98.2333	-	1.03631	0.157194
Q969E2	SCAMP4	Secretory carrier-associated membrane protein 4 OS=Homo sapiens OX=9606 GN=SCAMP4 PE=1 SV=1	14	4	15	4	229	25.7	8.82	76	100.9	103	101.4	101.3	95.3	98.1	101.767	98.2333	-	1.03597	0.128057
Q6P1M3	LLGL2	LLGL scribble cell polarity complex component 2 OS=Homo sapiens OX=9606 GN=LLGL2 PE=1 SV=2	1	1	1	1	1020	113.4	7.52	19	102.2	100.3	102.8	98.5	97.5	98.7	101.767	98.2333	-	1.03597	0.0136246
Q71RC2	LARP4	La-related protein 4 OS=Homo sapiens OX=9606 GN=LARP4 PE=1 SV=3	16	9	18	9	724	80.5	6.61	278	99	104.4	101.9	97.6	97.7	99.4	101.767	98.2333	-	1.03597	0.101245
P52435	POLR2J	DNA-directed RNA polymerase II subunit RPB11-a OS=Homo sapiens OX=9606 GN=POLR2J PE=1 SV=1	39	4	4	4	117	13.3	5.86	41	103.6	98.7	103	97.4	98.4	98.9	101.767	98.2333	-	1.03597	0.0924819
Q93084	ATP2A3	Sarcoplasmic/endoplasmic reticulum calcium ATPase 3 OS=Homo sapiens OX=9606 GN=ATP2A3 PE=1 SV=2	12	11	35	4	1043	113.9	5.57	650	103.7	104.9	96.7	97.8	96	100.9	101.767	98.2333	-	1.03597	0.294317
Q5T8D3	ACBD5	Acyl-CoA-binding domain-containing protein 5 OS=Homo sapiens OX=9606 GN=ACBD5 PE=1 SV=1	15	8	16	8	534	60.1	5.33	100	99.9	101.9	103.5	99.8	98.5	96.4	101.767	98.2333	-	1.03597	0.0698056
P0C0L4	C4A	Complement C4-A OS=Homo sapiens OX=9606 GN=C4A PE=1 SV=2	1	2	4	2	1744	192.7	7.08	18	106.5	86.6	112.2	97.6	102.2	94.9	101.767	98.2333	-	1.03597	0.683279
Q9UNN8	PROCR	Endothelial protein C receptor OS=Homo sapiens OX=9606 GN=PROCR PE=1 SV=1	9	2	3	2	238	26.7	7.18	40	103	99.8	102.4	101.8	93.9	99	101.733	98.2333	-	1.03563	0.236023
O00471	EXOC5	Exocyst complex component 5 OS=Homo sapiens OX=9606 GN=EXOC5 PE=1 SV=1	6	4	4	4	708	81.8	6.71	48	100.6	96.6	108	99	96.7	99	101.733	98.2333	-	1.03563	0.364753
O75380	NDUFS6	NADH dehydrogenase [ubiquinone] iron-sulfur protein 6, mitochondrial OS=Homo sapiens OX=9606 GN=NDUFS6 PE=1 SV=1	45	4	6	4	124	13.7	8.28	182	104.1	99	102.2	99.1	93.4	102.3	101.767	98.2667	-	1.03562	0.307897
Q9NQL2	RRAGD	Ras-related GTP-binding protein D OS=Homo sapiens OX=9606 GN=RRAGD PE=1 SV=1	9	3	5	3	400	45.6	4.92	75	105.5	99.4	100.2	96.2	100.6	97.9	101.7	98.2333	-	1.03529	0.206728
Q9H4H8	FAM83D	Protein FAM83D OS=Homo sapiens OX=9606 GN=FAM83D PE=1 SV=3	4	2	2	2	585	64.4	6.54	41	93.2	99.8	112.1	96.1	102.2	96.4	101.7	98.2333	-	1.03529	0.587361
Q8NDT2	RBM15B	Putative RNA-binding protein 15B OS=Homo sapiens OX=9606 GN=RBM15B PE=1 SV=3	4	4	7	3	890	97.1	9.85	64	98.7	102.9	103.6	97.2	98.5	99.1	101.733	98.2667	-	1.03528	0.10051
Q15631	TSN	Translin OS=Homo sapiens OX=9606 GN=TSN PE=1 SV=1	19	4	6	4	228	26.2	6.44	57	101.6	97.7	105.9	100.2	99.9	94.7	101.733	98.2667	-	1.03528	0.307349
Q96GQ7	DDX27	Probable ATP-dependent RNA helicase DDX27 OS=Homo sapiens OX=9606 GN=DDX27 PE=1 SV=2	30	27	77	27	796	89.8	9.28	778	99.5	102.7	103	98.8	98.4	97.6	101.733	98.2667	-	1.03528	0.0418772
P10301	RRAS	Ras-related protein R-Ras OS=Homo sapiens OX=9606 GN=RRAS PE=1 SV=1	44	10	35	8	218	23.5	6.93	578	103	103.2	99	98.9	96.9	99	101.733	98.2667	-	1.03528	0.0860342
O96018	APBA3	Amyloid-beta A4 precursor protein-binding family A member 3 OS=Homo sapiens OX=9606 GN=APBA3 PE=1 SV=1	2	1	1	1	575	61.4	4.94	40	103.3	98	103.9	87.4	94.7	112.7	101.733	98.2667	-	1.03528	0.677737
Q9BV79	MECR	Enoyl-[acyl-carrier-protein] reductase, mitochondrial OS=Homo sapiens OX=9606 GN=MECR PE=1 SV=2	19	7	12	7	373	40.4	8.76	52	100.6	102.7	101.9	100	96.9	97.9	101.733	98.2667	-	1.03528	0.0344159
Q8WVQ1	CANT1	Soluble calcium-activated nucleotidase 1 OS=Homo sapiens OX=9606 GN=CANT1 PE=1 SV=1	13	4	5	4	401	44.8	6.09	97	99	105	101.2	102.4	96.1	96.3	101.733	98.2667	-	1.03528	0.270029
Q9BXK5	BCL2L13	Bcl-2-like protein 13 OS=Homo sapiens OX=9606 GN=BCL2L13 PE=1 SV=1	16	5	13	5	485	52.7	4.44	239	100.6	105.1	99.4	100.9	96.6	97.3	101.7	98.2667	-	1.03494	0.191583
P98196	ATP11A	Probable phospholipid-transporting ATPase IH OS=Homo sapiens OX=9606 GN=ATP11A PE=1 SV=3	4	5	7	4	1134	129.7	6.6	94	100.4	102.5	102.2	98.9	97.4	98.5	101.7	98.2667	-	1.03494	0.0124299
Q8NHS3	MFSD8	Major facilitator superfamily domain-containing protein 8 OS=Homo sapiens OX=9606 GN=MFSD8 PE=1 SV=1	4	2	4	2	518	57.6	6.86	43	99.3	106.8	99	99.9	98.5	96.4	101.7	98.2667	-	1.03494	0.279447
Q9ULH0	KIDINS220	Kinase D-interacting substrate of 220 kDa OS=Homo sapiens OX=9606 GN=KIDINS220 PE=1 SV=3	7	10	12	10	1771	196.4	6.62	100	106.6	102.7	95.8	95.4	99.2	100.2	101.7	98.2667	-	1.03494	0.37965
O43660	PLRG1	Pleiotropic regulator 1 OS=Homo sapiens OX=9606 GN=PLRG1 PE=1 SV=1	19	10	15	10	514	57.2	9.17	199	103.5	99.9	101.7	95.9	99.7	99.2	101.7	98.2667	-	1.03494	0.0957085
Q9H920	RNF121	RING finger protein 121 OS=Homo sapiens OX=9606 GN=RNF121 PE=1 SV=1	7	2	3	2	327	37.9	7.06	105	102.1	104.1	99	95.6	101.7	97.6	101.733	98.3	-	1.03493	0.214455
Q92930	RAB8B	Ras-related protein Rab-8B OS=Homo sapiens OX=9606 GN=RAB8B PE=1 SV=2	35	8	61	2	207	23.6	9.07	782	101.7	100.7	102.8	100	98.8	96.1	101.733	98.3	-	1.03493	0.0578842
Q7Z2W4	ZC3HAV1	Zinc finger CCCH-type antiviral protein 1 OS=Homo sapiens OX=9606 GN=ZC3HAV1 PE=1 SV=3	23	17	28	17	902	101.4	8.4	313	100	103.6	101.5	100.7	96.5	97.7	101.7	98.3	-	1.03459	0.104996
Q16514	TAF12	Transcription initiation factor TFIID subunit 12 OS=Homo sapiens OX=9606 GN=TAF12 PE=1 SV=1	5	1	2	1	161	17.9	7.99	24	97.1	101.2	106.8	103.9	92.1	98.9	101.7	98.3	-	1.03459	0.485291
Q9BV38	WDR18	WD repeat-containing protein 18 OS=Homo sapiens OX=9606 GN=WDR18 PE=1 SV=2	22	9	20	9	432	47.4	6.7	210	102	101.2	101.9	97.5	99	98.4	101.7	98.3	-	1.03459	0.00250433
Q8TBA6	GOLGA5	Golgin subfamily A member 5 OS=Homo sapiens OX=9606 GN=GOLGA5 PE=1 SV=3	18	12	17	12	731	83	5.83	108	103.6	101.5	100	100.3	98.1	96.5	101.7	98.3	-	1.03459	0.0885953
Q49A26	GLYR1	Putative oxidoreductase GLYR1 OS=Homo sapiens OX=9606 GN=GLYR1 PE=1 SV=4	17	7	13	7	553	60.5	9.17	188	102.2	105.6	97.3	101.7	95.7	97.5	101.7	98.3	-	1.03459	0.319533
Q9BYC8	MRPL32	39S ribosomal protein L32, mitochondrial OS=Homo sapiens OX=9606 GN=MRPL32 PE=1 SV=1	24	4	9	4	188	21.4	9.73	171	101	101.8	102.3	93.3	100.3	101.3	101.7	98.3	-	1.03459	0.252495
Q9UBF2	COPG2	Coatomer subunit gamma-2 OS=Homo sapiens OX=9606 GN=COPG2 PE=1 SV=1	10	8	8	7	871	97.6	5.81	108	94.4	110.7	99.9	101.3	89.8	103.8	101.667	98.3	-	1.03425	0.628874
Q2TAY7	SMU1	WD40 repeat-containing protein SMU1 OS=Homo sapiens OX=9606 GN=SMU1 PE=1 SV=2	29	13	38	13	513	57.5	7.18	579	102.4	102.8	99.8	100.3	97.6	97	101.667	98.3	-	1.03425	0.0717323
Q8NBM4	UBAC2	Ubiquitin-associated domain-containing protein 2 OS=Homo sapiens OX=9606 GN=UBAC2 PE=1 SV=1	20	6	9	6	344	38.9	9.01	177	101.6	102.2	101.2	96.7	97.4	100.8	101.667	98.3	-	1.03425	0.0605914
Q8TED0	UTP15	U3 small nucleolar RNA-associated protein 15 homolog OS=Homo sapiens OX=9606 GN=UTP15 PE=1 SV=3	28	15	30	15	518	58.4	9.11	193	101.3	102.3	101.5	100.6	98.1	96.3	101.7	98.3333	-	1.03424	0.0586323
O43181	NDUFS4	NADH dehydrogenase [ubiquinone] iron-sulfur protein 4, mitochondrial OS=Homo sapiens OX=9606 GN=NDUFS4 PE=1 SV=1	14	2	11	2	175	20.1	10.3	137	102.4	102	100.7	97.2	99.4	98.4	101.7	98.3333	-	1.03424	0.0146139
O15440	ABCC5	Multidrug resistance-associated protein 5 OS=Homo sapiens OX=9606 GN=ABCC5 PE=1 SV=2	5	7	7	7	1437	160.6	8.66	69	99.4	102.1	103.6	97.7	98.3	99	101.7	98.3333	-	1.03424	0.0587954
P60468	SEC61B	Protein transport protein Sec61 subunit beta OS=Homo sapiens OX=9606 GN=SEC61B PE=1 SV=2	45	4	8	4	96	10	11.56	79	102.7	99.8	102.6	99	101.1	94.9	101.7	98.3333	-	1.03424	0.176494
P42785	PRCP	Lysosomal Pro-X carboxypeptidase OS=Homo sapiens OX=9606 GN=PRCP PE=1 SV=1	7	3	3	3	496	55.8	7.21	39	107.9	94.3	102.9	97.6	93	104.4	101.7	98.3333	-	1.03424	0.550502
Q8NC54	KCT2	Keratinocyte-associated transmembrane protein 2 OS=Homo sapiens OX=9606 GN=KCT2 PE=1 SV=2	9	2	5	2	265	29.2	5.08	129	100.3	103.4	101.4	98.4	95.4	101.2	101.7	98.3333	-	1.03424	0.151867
Q562F6	SGO2	Shugoshin 2 OS=Homo sapiens OX=9606 GN=SGO2 PE=1 SV=2	3	3	3	3	1265	144.7	7.91	35	114.6	95.6	94.7	108.9	101	85	101.633	98.3	-	1.03391	0.745086
P49257	LMAN1	Protein ERGIC-53 OS=Homo sapiens OX=9606 GN=LMAN1 PE=1 SV=2	32	19	58	19	510	57.5	6.77	732	102.3	102.9	99.8	99.1	97.9	98	101.667	98.3333	-	1.0339	0.031236
P40926	MDH2	Malate dehydrogenase, mitochondrial OS=Homo sapiens OX=9606 GN=MDH2 PE=1 SV=3	58	16	133	16	338	35.5	8.68	2231	104.1	101.7	99.2	100.3	97.2	97.5	101.667	98.3333	-	1.0339	0.12547
Q9NRW1	RAB6B	Ras-related protein Rab-6B OS=Homo sapiens OX=9606 GN=RAB6B PE=1 SV=1	31	6	34	2	208	23.4	5.53	340	105.9	99	100.1	103.4	98.8	92.8	101.667	98.3333	-	1.0339	0.423325
Q96T88	UHRF1	E3 ubiquitin-protein ligase UHRF1 OS=Homo sapiens OX=9606 GN=UHRF1 PE=1 SV=1	24	15	29	14	793	89.8	7.56	490	100.7	104.9	99.4	100.2	97.2	97.6	101.667	98.3333	-	1.0339	0.155486
Q5T3I0	GPATCH4	G patch domain-containing protein 4 OS=Homo sapiens OX=9606 GN=GPATCH4 PE=1 SV=2	27	10	20	10	446	50.4	9.63	270	99.2	102	103.8	98.6	96.2	100.2	101.667	98.3333	-	1.0339	0.133213
Q9Y6I9	TEX264	Testis-expressed protein 264 OS=Homo sapiens OX=9606 GN=TEX264 PE=1 SV=1	24	7	25	7	313	34.2	4.86	338	101.2	101.9	101.9	98.4	99.3	97.3	101.667	98.3333	-	1.0339	0.00590453
P06576	ATP5F1B	ATP synthase subunit beta, mitochondrial OS=Homo sapiens OX=9606 GN=ATP5F1B PE=1 SV=3	38	17	194	17	529	56.5	5.4	3353	103.3	100.4	101.3	99.7	97.7	97.6	101.667	98.3333	-	1.0339	0.0383989
O00214	LGALS8	Galectin-8 OS=Homo sapiens OX=9606 GN=LGALS8 PE=1 SV=4	23	7	18	7	317	35.8	8.25	214	105.6	99.1	100.3	97.7	99.8	97.5	101.667	98.3333	-	1.0339	0.192333
Q9H6Z4	RANBP3	Ran-binding protein 3 OS=Homo sapiens OX=9606 GN=RANBP3 PE=1 SV=1	5	2	2	2	567	60.2	4.78	43	106.6	93.5	104.9	97.5	97.3	100.2	101.667	98.3333	-	1.0339	0.473556
Q52LJ0	FAM98B	Protein FAM98B OS=Homo sapiens OX=9606 GN=FAM98B PE=1 SV=2	13	5	14	4	433	45.5	8.69	187	97.6	101.2	106.2	96.9	99.8	98.3	101.667	98.3333	-	1.0339	0.273823
Q96C57	CUSTOS	Protein CUSTOS OS=Homo sapiens OX=9606 GN=CUSTOS PE=1 SV=2	7	2	5	2	262	28.2	9.42	16	101.5	96.9	106.6	92.6	100.2	102.2	101.667	98.3333	-	1.0339	0.456674
P53680	AP2S1	AP-2 complex subunit sigma OS=Homo sapiens OX=9606 GN=AP2S1 PE=1 SV=2	25	4	7	4	142	17	6.18	70	102.4	100.1	102.5	96.5	100.9	97.6	101.667	98.3333	-	1.0339	0.0959395
P11279	LAMP1	Lysosome-associated membrane glycoprotein 1 OS=Homo sapiens OX=9606 GN=LAMP1 PE=1 SV=3	7	3	10	3	417	44.9	8.75	216	103.2	106.1	95.6	98.3	96.7	100	101.633	98.3333	-	1.03356	0.370301
Q9H6Y2	WDR55	WD repeat-containing protein 55 OS=Homo sapiens OX=9606 GN=WDR55 PE=1 SV=2	14	4	7	4	383	42	4.92	40	103.3	100.5	101.1	98.4	98.9	97.7	101.633	98.3333	-	1.03356	0.0229875
Q5VSG8	MANEAL	Glycoprotein endo-alpha-1,2-mannosidase-like protein OS=Homo sapiens OX=9606 GN=MANEAL PE=2 SV=1	2	1	1	1	457	51.3	6.98	0	105.3	102.2	97.4	102.6	91.3	101.1	101.633	98.3333	-	1.03356	0.478233
P54760	EPHB4	Ephrin type-B receptor 4 OS=Homo sapiens OX=9606 GN=EPHB4 PE=1 SV=2	8	8	13	6	987	108.2	6.9	209	107.1	100.6	97.2	96.4	99.3	99.3	101.633	98.3333	-	1.03356	0.341655
Q02556	IRF8	Interferon regulatory factor 8 OS=Homo sapiens OX=9606 GN=IRF8 PE=1 SV=2	2	1	2	1	426	48.3	6.77	31	101.3	112.3	91.3	90.4	104.7	99.9	101.633	98.3333	-	1.03356	0.67782
Q8WVM8	SCFD1	Sec1 family domain-containing protein 1 OS=Homo sapiens OX=9606 GN=SCFD1 PE=1 SV=4	30	15	34	15	642	72.3	6.27	451	103.5	101.7	99.8	100.1	98.7	96.3	101.667	98.3667	-	1.03355	0.0988015
Q9H9P8	L2HGDH	L-2-hydroxyglutarate dehydrogenase, mitochondrial OS=Homo sapiens OX=9606 GN=L2HGDH PE=1 SV=3	17	8	21	8	463	50.3	8.15	248	100.7	99.7	104.6	99.4	97.1	98.6	101.667	98.3667	-	1.03355	0.114477
P50416	CPT1A	Carnitine O-palmitoyltransferase 1, liver isoform OS=Homo sapiens OX=9606 GN=CPT1A PE=1 SV=2	29	20	65	20	773	88.3	8.65	1038	102.8	102.2	100	98	98.9	98.2	101.667	98.3667	-	1.03355	0.0209805
Q13277	STX3	Syntaxin-3 OS=Homo sapiens OX=9606 GN=STX3 PE=1 SV=3	15	5	8	5	289	33.1	5.44	54	98.4	100.7	105.8	100.3	95.6	99.2	101.633	98.3667	-	1.03321	0.278416
Q14554	PDIA5	Protein disulfide-isomerase A5 OS=Homo sapiens OX=9606 GN=PDIA5 PE=1 SV=1	15	7	11	7	519	59.6	7.91	50	107.1	102.5	95.3	102.3	97.7	95.1	101.633	98.3667	-	1.03321	0.462834
Q96D31	ORAI1	Calcium release-activated calcium channel protein 1 OS=Homo sapiens OX=9606 GN=ORAI1 PE=1 SV=2	4	1	3	1	301	32.6	8.32	67	103.5	96.6	104.8	101.4	92	101.7	101.633	98.3667	-	1.03321	0.467805
P19525	EIF2AK2	Interferon-induced, double-stranded RNA-activated protein kinase OS=Homo sapiens OX=9606 GN=EIF2AK2 PE=1 SV=2	21	12	33	12	551	62.1	8.4	267	97.8	104.3	102.8	95.9	98.8	100.4	101.633	98.3667	-	1.03321	0.239427
Q9P0T4	ZNF581	Zinc finger protein 581 OS=Homo sapiens OX=9606 GN=ZNF581 PE=1 SV=1	5	1	2	1	197	22	8.82	32	105.6	95.7	103.5	102	100.6	92.5	101.6	98.3667	-	1.03287	0.486614
Q06330	RBPJ	Recombining binding protein suppressor of hairless OS=Homo sapiens OX=9606 GN=RBPJ PE=1 SV=3	9	4	4	4	500	55.6	7.18	33	100.4	103.9	100.5	97	96.5	101.6	101.6	98.3667	-	1.03287	0.179431
Q5VV42	CDKAL1	Threonylcarbamoyladenosine tRNA methylthiotransferase OS=Homo sapiens OX=9606 GN=CDKAL1 PE=1 SV=1	20	10	14	10	579	65.1	7.46	140	102.3	101.5	101	99.5	97.2	98.4	101.6	98.3667	-	1.03287	0.0133765
Q9NR33	POLE4	DNA polymerase epsilon subunit 4 OS=Homo sapiens OX=9606 GN=POLE4 PE=1 SV=2	9	1	1	1	117	12.2	4.92	0	95.5	102.7	106.6	97.9	98.7	98.5	101.6	98.3667	-	1.03287	0.377431
Q9BQ49	SMIM7	Small integral membrane protein 7 OS=Homo sapiens OX=9606 GN=SMIM7 PE=1 SV=2	13	1	2	1	75	8.6	8.18	63	105.8	101.4	97.6	106.9	93.3	94.9	101.6	98.3667	-	1.03287	0.545568
Q9HAF1	MEAF6	Chromatin modification-related protein MEAF6 OS=Homo sapiens OX=9606 GN=MEAF6 PE=1 SV=1	17	2	4	2	191	21.6	9.32	110	104.4	98.8	101.6	99.3	97.2	98.6	101.6	98.3667	-	1.03287	0.135066
Q9H2U1	DHX36	ATP-dependent DNA/RNA helicase DHX36 OS=Homo sapiens OX=9606 GN=DHX36 PE=1 SV=2	13	12	13	11	1008	114.7	7.68	58	102.3	101.8	100.8	97.4	98.8	99	101.633	98.4	-	1.03286	0.00844952
O94808	GFPT2	Glutamine--fructose-6-phosphate aminotransferase [isomerizing] 2 OS=Homo sapiens OX=9606 GN=GFPT2 PE=1 SV=3	17	9	13	6	682	76.9	7.37	89	97.9	89.5	117.5	99.3	99.1	96.8	101.633	98.4	-	1.03286	0.717812
Q5T2R2	PDSS1	Decaprenyl-diphosphate synthase subunit 1 OS=Homo sapiens OX=9606 GN=PDSS1 PE=1 SV=1	2	1	1	1	415	46.2	9	26	99.3	102.6	103	102.9	95.1	97.2	101.633	98.4	-	1.03286	0.282906
P07954	FH	Fumarate hydratase, mitochondrial OS=Homo sapiens OX=9606 GN=FH PE=1 SV=3	33	17	83	17	510	54.6	8.76	1580	102.8	101.5	100.6	100.2	97.7	97.3	101.633	98.4	-	1.03286	0.0435001
Q96ET8	TVP23C	Golgi apparatus membrane protein TVP23 homolog C OS=Homo sapiens OX=9606 GN=TVP23C PE=1 SV=3	16	3	6	3	276	31.1	9.29	85	104.7	99.2	101	97.3	97.7	100.2	101.633	98.4	-	1.03286	0.156441
Q9H9Y2	RPF1	Ribosome production factor 1 OS=Homo sapiens OX=9606 GN=RPF1 PE=1 SV=2	16	4	8	4	349	40.1	10.01	151	97	101.4	106.5	99.2	98.4	97.6	101.633	98.4	-	1.03286	0.309984
P22033	MMUT	Methylmalonyl-CoA mutase, mitochondrial OS=Homo sapiens OX=9606 GN=MMUT PE=1 SV=4	15	11	16	11	750	83.1	6.93	143	105.9	100.3	98.7	101.2	95.4	98.6	101.633	98.4	-	1.03286	0.305318
Q9Y4A5	TRRAP	Transformation/transcription domain-associated protein OS=Homo sapiens OX=9606 GN=TRRAP PE=1 SV=3	5	16	19	16	3859	437.3	8.19	214	100.4	103.2	101.2	95.6	98.6	101	101.6	98.4	-	1.03252	0.14492
P22670	RFX1	MHC class II regulatory factor RFX1 OS=Homo sapiens OX=9606 GN=RFX1 PE=1 SV=2	4	3	4	3	979	104.7	6.29	78	105.8	103.3	95.7	99.2	97	99	101.6	98.4	-	1.03252	0.362642
Q03001	DST	Dystonin OS=Homo sapiens OX=9606 GN=DST PE=1 SV=4	3	20	23	17	7570	860.1	5.25	158	104.1	100.2	100.5	99	97.1	99.1	101.6	98.4	-	1.03252	0.0860577
P0DN76	U2AF1L5	Splicing factor U2AF 35 kDa subunit-like protein OS=Homo sapiens OX=9606 GN=U2AF1L5 PE=1 SV=1	22	7	17	7	240	27.9	8.81	195	101.8	104.3	98.7	99.5	98.6	97.1	101.6	98.4	-	1.03252	0.143947
Q93034	CUL5	Cullin-5 OS=Homo sapiens OX=9606 GN=CUL5 PE=1 SV=4	6	4	4	4	780	90.9	7.94	35	103.6	100.6	100.6	98.2	97.7	99.3	101.6	98.4	-	1.03252	0.0444202
P54098	POLG	DNA polymerase subunit gamma-1 OS=Homo sapiens OX=9606 GN=POLG PE=1 SV=1	13	12	15	12	1239	139.5	6.9	70	104.3	100.4	100.1	96.2	99.8	99.2	101.6	98.4	-	1.03252	0.141829
Q14527	HLTF	Helicase-like transcription factor OS=Homo sapiens OX=9606 GN=HLTF PE=1 SV=2	21	19	32	19	1009	113.9	8.6	345	99.5	104.1	101.2	100.6	97.2	97.4	101.6	98.4	-	1.03252	0.139209
Q9NR56	MBNL1	Muscleblind-like protein 1 OS=Homo sapiens OX=9606 GN=MBNL1 PE=1 SV=2	12	5	13	2	388	41.8	8.9	69	108.3	101.7	94.8	98.2	101.4	95.6	101.6	98.4	-	1.03252	0.492708
O43809	NUDT21	Cleavage and polyadenylation specificity factor subunit 5 OS=Homo sapiens OX=9606 GN=NUDT21 PE=1 SV=1	23	6	21	6	227	26.2	8.82	242	96.7	108	100.1	99.5	97.4	98.3	101.6	98.4	-	1.03252	0.40015
O96005	CLPTM1	Cleft lip and palate transmembrane protein 1 OS=Homo sapiens OX=9606 GN=CLPTM1 PE=1 SV=1	23	13	30	13	669	76	6.3	340	101.2	104.1	99.4	97.7	99.3	98.2	101.567	98.4	-	1.03218	0.0940731
Q96G01	BICD1	Protein bicaudal D homolog 1 OS=Homo sapiens OX=9606 GN=BICD1 PE=1 SV=3	9	7	9	7	975	110.7	5.81	46	101.1	100	103.6	94.9	102.1	98.2	101.567	98.4	-	1.03218	0.246988
O95782	AP2A1	AP-2 complex subunit alpha-1 OS=Homo sapiens OX=9606 GN=AP2A1 PE=1 SV=3	30	29	68	19	977	107.5	7.03	773	104.2	99.9	100.6	98.3	97	99.9	101.567	98.4	-	1.03218	0.114572
Q5JUR7	TEX30	Testis-expressed protein 30 OS=Homo sapiens OX=9606 GN=TEX30 PE=2 SV=1	4	1	1	1	227	25.6	8.66	0	105.6	97.5	101.6	89	100.1	106.1	101.567	98.4	-	1.03218	0.597409
O60888	CUTA	Protein CutA OS=Homo sapiens OX=9606 GN=CUTA PE=1 SV=2	8	1	1	1	179	19.1	5.5	42	106.5	97.9	100.3	96.1	97.6	101.5	101.567	98.4	-	1.03218	0.354352
Q9NYJ1	COA4	Cytochrome c oxidase assembly factor 4 homolog, mitochondrial OS=Homo sapiens OX=9606 GN=COA4 PE=1 SV=2	30	2	2	2	87	10.1	6.04	23	78.5	122.1	104.1	85.8	111	98.4	101.567	98.4	-	1.03218	0.838821
O15254	ACOX3	Peroxisomal acyl-coenzyme A oxidase 3 OS=Homo sapiens OX=9606 GN=ACOX3 PE=1 SV=2	10	5	9	5	700	77.6	7.25	217	101.8	96.8	106.2	98.2	98.3	98.8	101.6	98.4333	-	1.03217	0.309308
P10620	MGST1	Microsomal glutathione S-transferase 1 OS=Homo sapiens OX=9606 GN=MGST1 PE=1 SV=1	9	2	5	2	155	17.6	9.39	160	102.7	104.3	97.8	101	98.5	95.8	101.6	98.4333	-	1.03217	0.268315
P61011	SRP54	Signal recognition particle 54 kDa protein OS=Homo sapiens OX=9606 GN=SRP54 PE=1 SV=1	20	11	20	11	504	55.7	8.75	181	95	102.9	106.9	99.6	96.7	99	101.6	98.4333	-	1.03217	0.429458
P21281	ATP6V1B2	V-type proton ATPase subunit B, brain isoform OS=Homo sapiens OX=9606 GN=ATP6V1B2 PE=1 SV=3	18	9	15	9	511	56.5	5.81	304	94.8	104.1	105.8	97.5	100.2	97.6	101.567	98.4333	-	1.03183	0.425026
Q9BZL1	UBL5	Ubiquitin-like protein 5 OS=Homo sapiens OX=9606 GN=UBL5 PE=1 SV=1	41	3	5	3	73	8.5	8.44	50	105.2	95.9	103.6	103.7	95.7	95.9	101.567	98.4333	-	1.03183	0.466336
O95299	NDUFA10	NADH dehydrogenase [ubiquinone] 1 alpha subcomplex subunit 10, mitochondrial OS=Homo sapiens OX=9606 GN=NDUFA10 PE=1 SV=1	22	10	27	10	355	40.7	8.48	210	104	103.8	96.9	98.9	99	97.4	101.567	98.4333	-	1.03183	0.260171
Q9P013	CWC15	Spliceosome-associated protein CWC15 homolog OS=Homo sapiens OX=9606 GN=CWC15 PE=1 SV=2	19	5	8	5	229	26.6	5.71	49	102.1	102.1	100.5	100.6	98.8	95.9	101.567	98.4333	-	1.03183	0.0999252
O95070	YIF1A	Protein YIF1A OS=Homo sapiens OX=9606 GN=YIF1A PE=1 SV=2	5	1	1	1	293	32	8.95	0	98.4	105.7	100.6	97.4	97.9	100	101.567	98.4333	-	1.03183	0.245465
Q9H6V9	LDAH	Lipid droplet-associated hydrolase OS=Homo sapiens OX=9606 GN=LDAH PE=1 SV=1	13	4	4	4	325	37.3	6.54	47	95.6	103.2	105.9	94.3	98.7	102.3	101.567	98.4333	-	1.03183	0.461911
Q12907	LMAN2	Vesicular integral-membrane protein VIP36 OS=Homo sapiens OX=9606 GN=LMAN2 PE=1 SV=1	28	10	46	10	356	40.2	6.95	496	100.6	103.1	101	99.8	97.6	97.9	101.567	98.4333	-	1.03183	0.0391142
Q8NCA5	FAM98A	Protein FAM98A OS=Homo sapiens OX=9606 GN=FAM98A PE=1 SV=2	12	4	8	3	518	55.2	8.95	269	100.6	99.9	104.2	95.9	101.3	98.1	101.567	98.4333	-	1.03183	0.202406
P43121	MCAM	Cell surface glycoprotein MUC18 OS=Homo sapiens OX=9606 GN=MCAM PE=1 SV=2	27	16	40	16	646	71.6	5.76	568	104.5	104.1	96.1	104	96.3	95	101.567	98.4333	-	1.03183	0.468958
Q7Z434	MAVS	Mitochondrial antiviral-signaling protein OS=Homo sapiens OX=9606 GN=MAVS PE=1 SV=2	14	5	8	5	540	56.5	5.52	135	102	102.1	100.6	101	96.5	97.8	101.567	98.4333	-	1.03183	0.0923028
Q9UGY1	NOL12	Nucleolar protein 12 OS=Homo sapiens OX=9606 GN=NOL12 PE=1 SV=1	19	4	9	4	213	24.6	10.23	56	98.6	106	100.1	100.8	98.2	96.3	101.567	98.4333	-	1.03183	0.295871
P16157	ANK1	Ankyrin-1 OS=Homo sapiens OX=9606 GN=ANK1 PE=1 SV=3	1	2	2	2	1881	206.1	6.01	0	103.1	101.9	99.7	96.1	98.2	101	101.567	98.4333	-	1.03183	0.144992
Q8N257	HIST3H2BB	Histone H2B type 3-B OS=Homo sapiens OX=9606 GN=HIST3H2BB PE=1 SV=3	53	8	113	2	126	13.9	10.32	1903	99.4	105.5	99.8	94.7	100.2	100.4	101.567	98.4333	-	1.03183	0.312659
P52298	NCBP2	Nuclear cap-binding protein subunit 2 OS=Homo sapiens OX=9606 GN=NCBP2 PE=1 SV=1	22	4	7	4	156	18	8.21	44	99.2	100.2	105.2	98.5	98.7	98.1	101.533	98.4333	-	1.03149	0.171679
Q9BRT6	LLPH	Protein LLP homolog OS=Homo sapiens OX=9606 GN=LLPH PE=1 SV=1	29	3	7	3	129	15.2	10.37	27	100.1	101.3	103.2	102.4	96.9	96	101.533	98.4333	-	1.03149	0.230622
P62072	TIMM10	Mitochondrial import inner membrane translocase subunit Tim10 OS=Homo sapiens OX=9606 GN=TIMM10 PE=1 SV=1	40	6	11	6	90	10.3	6.29	77	96.6	105.8	102.2	104.5	92.5	98.3	101.533	98.4333	-	1.03149	0.517992
Q9UL54	TAOK2	Serine/threonine-protein kinase TAO2 OS=Homo sapiens OX=9606 GN=TAOK2 PE=1 SV=2	5	6	9	5	1235	138.2	7.27	66	101	103.2	100.5	100.8	97.7	96.9	101.567	98.4667	-	1.03148	0.0993027
Q8TCD1	C18orf32	UPF0729 protein C18orf32 OS=Homo sapiens OX=9606 GN=C18orf32 PE=3 SV=1	24	2	4	2	76	8.7	9.13	55	101.4	103.7	99.6	100.8	96.3	98.3	101.567	98.4667	-	1.03148	0.153208
Q9Y6I3	EPN1	Epsin-1 OS=Homo sapiens OX=9606 GN=EPN1 PE=1 SV=2	13	5	7	5	576	60.3	4.83	85	104.4	98.5	101.8	98.1	98.6	98.7	101.567	98.4667	-	1.03148	0.145351
P86790	CCZ1B	Vacuolar fusion protein CCZ1 homolog B OS=Homo sapiens OX=9606 GN=CCZ1B PE=1 SV=1	7	3	3	3	482	55.8	6.48	37	100.1	102.1	102.5	101.8	95.5	98.1	101.567	98.4667	-	1.03148	0.191206
P61254	RPL26	60S ribosomal protein L26 OS=Homo sapiens OX=9606 GN=RPL26 PE=1 SV=1	34	7	27	2	145	17.2	10.55	119	93.3	107	104.4	95.9	101	98.5	101.567	98.4667	-	1.03148	0.524526
P30876	POLR2B	DNA-directed RNA polymerase II subunit RPB2 OS=Homo sapiens OX=9606 GN=POLR2B PE=1 SV=1	10	12	18	12	1174	133.8	6.87	97	98.3	101.2	105.2	98.7	97.3	99.4	101.567	98.4667	-	1.03148	0.212758
O94832	MYO1D	Unconventional myosin-Id OS=Homo sapiens OX=9606 GN=MYO1D PE=1 SV=2	16	17	28	17	1006	116.1	9.39	151	102.6	100.9	101.2	101.3	96.9	97.2	101.567	98.4667	-	1.03148	0.109811
Q86UL3	GPAT4	Glycerol-3-phosphate acyltransferase 4 OS=Homo sapiens OX=9606 GN=GPAT4 PE=1 SV=1	13	5	11	4	456	52	9.19	157	103.6	103	98	96.7	96	102.7	101.533	98.4667	-	1.03114	0.330325
O75694	NUP155	Nuclear pore complex protein Nup155 OS=Homo sapiens OX=9606 GN=NUP155 PE=1 SV=1	21	25	65	25	1391	155.1	6.16	852	101.8	101.9	100.9	98.9	98.1	98.4	101.533	98.4667	-	1.03114	0.0014751
P40429	RPL13A	60S ribosomal protein L13a OS=Homo sapiens OX=9606 GN=RPL13A PE=1 SV=2	38	9	60	9	203	23.6	10.93	666	96.3	106.5	101.8	94.9	100.6	99.9	101.533	98.4667	-	1.03114	0.424402
Q8TEQ6	GEMIN5	Gem-associated protein 5 OS=Homo sapiens OX=9606 GN=GEMIN5 PE=1 SV=3	10	15	23	15	1508	168.5	6.62	169	100.8	101.2	102.6	96.2	99.2	100	101.533	98.4667	-	1.03114	0.0745246
Q9UHK6	AMACR	Alpha-methylacyl-CoA racemase OS=Homo sapiens OX=9606 GN=AMACR PE=1 SV=2	6	2	2	2	382	42.4	6.44	20	98.8	100.2	105.6	99.7	97.8	97.9	101.533	98.4667	-	1.03114	0.229243
P63010	AP2B1	AP-2 complex subunit beta OS=Homo sapiens OX=9606 GN=AP2B1 PE=1 SV=1	27	27	72	11	937	104.5	5.38	938	104.1	100.1	100.4	99.3	98.4	97.7	101.533	98.4667	-	1.03114	0.0883046
Q5BJH7	YIF1B	Protein YIF1B OS=Homo sapiens OX=9606 GN=YIF1B PE=1 SV=1	9	2	9	2	314	34.4	9.16	96	93.8	108.4	102.4	93.6	98.8	103	101.533	98.4667	-	1.03114	0.575309
Q15738	NSDHL	Sterol-4-alpha-carboxylate 3-dehydrogenase, decarboxylating OS=Homo sapiens OX=9606 GN=NSDHL PE=1 SV=2	39	14	49	14	373	41.9	8.06	550	101.4	102.8	100.4	98.5	98.5	98.4	101.533	98.4667	-	1.03114	0.0116825
Q9P287	BCCIP	BRCA2 and CDKN1A-interacting protein OS=Homo sapiens OX=9606 GN=BCCIP PE=1 SV=1	9	3	4	3	314	36	4.61	36	99.2	102.5	102.9	90.2	104.9	100.3	101.533	98.4667	-	1.03114	0.532713
Q9H4I3	TRABD	TraB domain-containing protein OS=Homo sapiens OX=9606 GN=TRABD PE=1 SV=1	8	3	9	3	376	42.3	8	103	102.7	104.3	97.5	99.9	98.1	97.4	101.5	98.4667	-	1.03081	0.237111
Q12913	PTPRJ	Receptor-type tyrosine-protein phosphatase eta OS=Homo sapiens OX=9606 GN=PTPRJ PE=1 SV=3	11	12	20	12	1337	145.9	5.58	151	107.8	98.8	97.9	95.9	98.1	101.4	101.5	98.4667	-	1.03081	0.440032
Q8WYA6	CTNNBL1	Beta-catenin-like protein 1 OS=Homo sapiens OX=9606 GN=CTNNBL1 PE=1 SV=1	19	12	20	12	563	65.1	5.05	191	98.2	99.1	107.3	97.1	99.4	99	101.533	98.5	-	1.0308	0.366384
Q96AG3	SLC25A46	Solute carrier family 25 member 46 OS=Homo sapiens OX=9606 GN=SLC25A46 PE=1 SV=1	7	3	3	3	418	46.1	7.43	50	104.8	99.9	99.9	96.8	98.6	100.1	101.533	98.5	-	1.0308	0.184053
Q9H6R6	ZDHHC6	Palmitoyltransferase ZDHHC6 OS=Homo sapiens OX=9606 GN=ZDHHC6 PE=1 SV=1	8	3	3	3	413	47.6	8.47	80	105	102.7	96.9	102.2	96.8	96.5	101.533	98.5	-	1.0308	0.374755
P33527	ABCC1	Multidrug resistance-associated protein 1 OS=Homo sapiens OX=9606 GN=ABCC1 PE=1 SV=3	27	34	77	34	1531	171.5	7.11	964	102.8	101.8	100	100.4	96.8	98.3	101.533	98.5	-	1.0308	0.0842517
Q96RQ1	ERGIC2	Endoplasmic reticulum-Golgi intermediate compartment protein 2 OS=Homo sapiens OX=9606 GN=ERGIC2 PE=1 SV=2	11	4	12	4	377	42.5	6.77	90	103.9	104	96.7	99.3	98.3	97.9	101.533	98.5	-	1.0308	0.283791
Q9C0J8	WDR33	pre-mRNA 3' end processing protein WDR33 OS=Homo sapiens OX=9606 GN=WDR33 PE=1 SV=2	12	14	26	14	1336	145.8	9.17	198	98.3	98.7	107.5	99.8	97.3	98.4	101.5	98.5	-	1.03046	0.386331
O43760	SYNGR2	Synaptogyrin-2 OS=Homo sapiens OX=9606 GN=SYNGR2 PE=1 SV=1	13	3	7	3	224	24.8	4.94	106	86.9	120.8	96.8	99.8	103.6	92.1	101.5	98.5	-	1.03046	0.79154
Q96B49	TOMM6	Mitochondrial import receptor subunit TOM6 homolog OS=Homo sapiens OX=9606 GN=TOMM6 PE=1 SV=1	57	2	7	2	74	8	4.89	225	95.3	106.6	102.6	97.8	94.9	102.8	101.5	98.5	-	1.03046	0.4983
Q9NQ11	ATP13A2	Cation-transporting ATPase 13A2 OS=Homo sapiens OX=9606 GN=ATP13A2 PE=1 SV=2	2	3	5	3	1180	128.7	8.12	29	102.4	96.7	105.4	91.9	104.2	99.4	101.5	98.5	-	1.03046	0.532385
O00124	UBXN8	UBX domain-containing protein 8 OS=Homo sapiens OX=9606 GN=UBXN8 PE=1 SV=2	6	1	1	1	270	30.5	7.78	33	104.2	98.6	101.7	93.9	100.4	101.2	101.5	98.5	-	1.03046	0.347747
Q96PV6	LENG8	Leukocyte receptor cluster member 8 OS=Homo sapiens OX=9606 GN=LENG8 PE=1 SV=3	8	5	7	5	800	88.1	9.11	170	100	104.2	100.3	98.6	91.8	105.1	101.5	98.5	-	1.03046	0.502061
O00264	PGRMC1	Membrane-associated progesterone receptor component 1 OS=Homo sapiens OX=9606 GN=PGRMC1 PE=1 SV=3	37	7	20	6	195	21.7	4.7	414	105.3	101.7	97.5	99	95.8	100.7	101.5	98.5	-	1.03046	0.324486
P13861	PRKAR2A	cAMP-dependent protein kinase type II-alpha regulatory subunit OS=Homo sapiens OX=9606 GN=PRKAR2A PE=1 SV=2	38	13	32	13	404	45.5	5.07	482	101.3	101.8	101.4	98.4	98.5	98.6	101.5	98.5	-	1.03046	5.16504e-05
Q8WXH0	SYNE2	Nesprin-2 OS=Homo sapiens OX=9606 GN=SYNE2 PE=1 SV=3	4	29	31	29	6885	795.9	5.36	157	102.3	101.7	100.5	97.4	97.7	100.4	101.5	98.5	-	1.03046	0.0513694
P32121	ARRB2	Beta-arrestin-2 OS=Homo sapiens OX=9606 GN=ARRB2 PE=1 SV=2	2	1	1	1	409	46.1	7.69	0	99.2	102.3	103	97.1	100	98.4	101.5	98.5	-	1.03046	0.105208
P63000	RAC1	Ras-related C3 botulinum toxin substrate 1 OS=Homo sapiens OX=9606 GN=RAC1 PE=1 SV=1	41	7	39	6	192	21.4	8.5	441	101	102.8	100.7	99.7	97.1	98.7	101.5	98.5	-	1.03046	0.040139
O43913	ORC5	Origin recognition complex subunit 5 OS=Homo sapiens OX=9606 GN=ORC5 PE=1 SV=1	9	4	7	4	435	50.3	7.74	55	100.1	104.3	100.1	97.9	98.1	99.5	101.5	98.5	-	1.03046	0.113951
P62826	RAN	GTP-binding nuclear protein Ran OS=Homo sapiens OX=9606 GN=RAN PE=1 SV=3	26	5	34	5	216	24.4	7.49	536	102.1	98.3	104.1	98	98.5	99	101.5	98.5	-	1.03046	0.157053
Q9NNW5	WDR6	WD repeat-containing protein 6 OS=Homo sapiens OX=9606 GN=WDR6 PE=1 SV=1	2	2	2	2	1121	121.6	6.87	32	107.5	82.4	114.6	79.3	96.8	119.4	101.5	98.5	-	1.03046	0.852876
Q96SB3	PPP1R9B	Neurabin-2 OS=Homo sapiens OX=9606 GN=PPP1R9B PE=1 SV=3	20	13	24	12	817	89.3	4.97	267	108.3	97.5	98.6	100.4	95	100.1	101.467	98.5	-	1.03012	0.484257
O75530	EED	Polycomb protein EED OS=Homo sapiens OX=9606 GN=EED PE=1 SV=2	13	5	7	5	441	50.2	7.03	44	103.6	101.2	99.6	96.2	99.3	100	101.467	98.5	-	1.03012	0.146128
Q9Y678	COPG1	Coatomer subunit gamma-1 OS=Homo sapiens OX=9606 GN=COPG1 PE=1 SV=1	26	19	34	18	874	97.7	5.47	382	99.3	98.4	106.7	96.2	99.6	99.7	101.467	98.5	-	1.03012	0.359706
Q6P9B6	MEAK7	MTOR-associated protein MEAK7 OS=Homo sapiens OX=9606 GN=MEAK7 PE=1 SV=2	8	3	3	3	456	51	6.24	48	97.3	97.5	109.6	92.7	101.8	101	101.467	98.5	-	1.03012	0.584913
P03891	MT-ND2	NADH-ubiquinone oxidoreductase chain 2 OS=Homo sapiens OX=9606 GN=MT-ND2 PE=1 SV=2	5	2	2	2	347	38.9	9.83	26	104	105.2	95.2	96.1	97.8	101.6	101.467	98.5	-	1.03012	0.44999
O43670	ZNF207	BUB3-interacting and GLEBS motif-containing protein ZNF207 OS=Homo sapiens OX=9606 GN=ZNF207 PE=1 SV=1	7	3	8	3	478	50.7	9.1	133	99.4	101.1	103.9	99	96.3	100.2	101.467	98.5	-	1.03012	0.164664
P48729	CSNK1A1	Casein kinase I isoform alpha OS=Homo sapiens OX=9606 GN=CSNK1A1 PE=1 SV=2	24	7	10	7	337	38.9	9.57	81	105.4	97.1	101.9	98.3	99.1	98.1	101.467	98.5	-	1.03012	0.288347
Q6RFH5	WDR74	WD repeat-containing protein 74 OS=Homo sapiens OX=9606 GN=WDR74 PE=1 SV=1	24	8	12	8	385	42.4	8.32	204	99.7	103.6	101.2	97.8	98.1	99.7	101.5	98.5333	-	1.03011	0.0813017
O15504	NUP42	Nucleoporin NUP42 OS=Homo sapiens OX=9606 GN=NUP42 PE=1 SV=1	13	5	9	5	423	44.8	9.19	108	100.6	102.7	101.2	100.8	96.6	98.2	101.5	98.5333	-	1.03011	0.0969758
P36776	LONP1	Lon protease homolog, mitochondrial OS=Homo sapiens OX=9606 GN=LONP1 PE=1 SV=2	30	29	100	29	959	106.4	6.39	1603	101.7	102.3	100.5	100.1	97.8	97.7	101.5	98.5333	-	1.03011	0.0349541
Q9BUP3	HTATIP2	Oxidoreductase HTATIP2 OS=Homo sapiens OX=9606 GN=HTATIP2 PE=1 SV=2	17	5	7	5	242	27	8.38	86	105	104.8	94.7	95.8	95.9	103.9	101.5	98.5333	-	1.03011	0.531057
Q14676	MDC1	Mediator of DNA damage checkpoint protein 1 OS=Homo sapiens OX=9606 GN=MDC1 PE=1 SV=3	8	8	12	8	2089	226.5	5.47	139	96.5	99.5	108.4	97.3	99.5	98.8	101.467	98.5333	-	1.02977	0.464549
Q7Z7K6	CENPV	Centromere protein V OS=Homo sapiens OX=9606 GN=CENPV PE=1 SV=1	31	8	20	8	275	29.9	9.73	186	100.6	102.1	101.7	98.9	98.6	98.1	101.467	98.5333	-	1.02977	0.00438763
O15438	ABCC3	Canalicular multispecific organic anion transporter 2 OS=Homo sapiens OX=9606 GN=ABCC3 PE=1 SV=3	4	6	9	6	1527	169.2	7.2	82	104.4	100.4	99.6	103.3	96.7	95.6	101.467	98.5333	-	1.02977	0.357884
Q8WY22	BRI3BP	BRI3-binding protein OS=Homo sapiens OX=9606 GN=BRI3BP PE=1 SV=1	14	2	5	2	251	27.8	9.44	256	106	94.3	104.1	98.5	100.4	96.7	101.467	98.5333	-	1.02977	0.48098
Q8NAV1	PRPF38A	Pre-mRNA-splicing factor 38A OS=Homo sapiens OX=9606 GN=PRPF38A PE=1 SV=1	15	5	11	5	312	37.5	9.96	107	100.7	103.7	100	98.4	97.8	99.4	101.467	98.5333	-	1.02977	0.0751161
Q92572	AP3S1	AP-3 complex subunit sigma-1 OS=Homo sapiens OX=9606 GN=AP3S1 PE=1 SV=1	17	3	3	3	193	21.7	5.39	19	102.2	95.7	106.5	93.9	103.1	98.6	101.467	98.5333	-	1.02977	0.515038
Q14699	RFTN1	Raftlin OS=Homo sapiens OX=9606 GN=RFTN1 PE=1 SV=4	1	1	1	1	578	63.1	5.67	21	104.7	87.7	111.9	95.1	95.3	105.2	101.433	98.5333	-	1.02943	0.732505
Q9BQ67	GRWD1	Glutamate-rich WD repeat-containing protein 1 OS=Homo sapiens OX=9606 GN=GRWD1 PE=1 SV=1	18	7	11	7	446	49.4	4.92	280	96.1	102.7	105.5	95.3	101.4	98.9	101.433	98.5333	-	1.02943	0.429311
O75390	CS	Citrate synthase, mitochondrial OS=Homo sapiens OX=9606 GN=CS PE=1 SV=2	27	13	80	13	466	51.7	8.32	999	101.4	102.2	100.7	100.9	97.5	97.2	101.433	98.5333	-	1.02943	0.0833194
P51159	RAB27A	Ras-related protein Rab-27A OS=Homo sapiens OX=9606 GN=RAB27A PE=1 SV=3	11	2	4	2	221	24.9	5.22	76	97.7	104.7	101.9	97.8	96.8	101	101.433	98.5333	-	1.02943	0.292824
Q5VZL5	ZMYM4	Zinc finger MYM-type protein 4 OS=Homo sapiens OX=9606 GN=ZMYM4 PE=1 SV=1	10	13	15	13	1548	172.7	6.84	69	99.2	101.7	103.4	99.3	96.4	99.9	101.433	98.5333	-	1.02943	0.149756
O00220	TNFRSF10A	Tumor necrosis factor receptor superfamily member 10A OS=Homo sapiens OX=9606 GN=TNFRSF10A PE=1 SV=3	6	4	7	4	468	50.1	7.03	40	98.9	102.7	102.7	98	96.8	100.8	101.433	98.5333	-	1.02943	0.169874
Q96GS4	BORCS6	BLOC-1-related complex subunit 6 OS=Homo sapiens OX=9606 GN=BORCS6 PE=1 SV=2	8	2	2	2	357	37.2	5.76	31	104.5	103.1	96.7	103.4	97.2	95	101.433	98.5333	-	1.02943	0.451152
Q8N128	FAM177A1	Protein FAM177A1 OS=Homo sapiens OX=9606 GN=FAM177A1 PE=1 SV=1	24	3	7	3	213	23.7	4.45	136	100.1	104.5	99.7	98.8	98.9	97.9	101.433	98.5333	-	1.02943	0.138488
P62306	SNRPF	Small nuclear ribonucleoprotein F OS=Homo sapiens OX=9606 GN=SNRPF PE=1 SV=1	9	1	3	1	86	9.7	4.67	17	100.7	101.3	102.3	97	99	99.6	101.433	98.5333	-	1.02943	0.0337747
P23458	JAK1	Tyrosine-protein kinase JAK1 OS=Homo sapiens OX=9606 GN=JAK1 PE=1 SV=2	13	15	26	15	1154	133.2	7.55	226	101.8	102.4	100.1	95.9	99.6	100.1	101.433	98.5333	-	1.02943	0.124025
Q9UDW1	UQCR10	Cytochrome b-c1 complex subunit 9 OS=Homo sapiens OX=9606 GN=UQCR10 PE=1 SV=3	40	2	8	2	63	7.3	9.47	169	101.4	103.6	99.3	100.8	97.3	97.5	101.433	98.5333	-	1.02943	0.159761
Q13503	MED21	Mediator of RNA polymerase II transcription subunit 21 OS=Homo sapiens OX=9606 GN=MED21 PE=1 SV=1	13	1	1	1	144	15.6	4.45	45	95	105	104.3	99.7	96.1	99.8	101.433	98.5333	-	1.02943	0.447301
P21283	ATP6V1C1	V-type proton ATPase subunit C 1 OS=Homo sapiens OX=9606 GN=ATP6V1C1 PE=1 SV=4	17	7	8	7	382	43.9	7.46	60	99.2	101.9	103.3	98	98.6	99.1	101.467	98.5667	-	1.02942	0.080237
O95772	STARD3NL	STARD3 N-terminal-like protein OS=Homo sapiens OX=9606 GN=STARD3NL PE=1 SV=1	9	2	6	2	234	26.6	4.81	124	103.3	104	97.1	102.6	95.5	97.6	101.467	98.5667	-	1.02942	0.394145
O43674	NDUFB5	NADH dehydrogenase [ubiquinone] 1 beta subcomplex subunit 5, mitochondrial OS=Homo sapiens OX=9606 GN=NDUFB5 PE=1 SV=1	25	5	13	5	189	21.7	9.63	69	102.8	98.1	103.5	98.6	100.2	96.9	101.467	98.5667	-	1.02942	0.210184
P53701	HCCS	Cytochrome c-type heme lyase OS=Homo sapiens OX=9606 GN=HCCS PE=1 SV=1	32	8	28	8	268	30.6	6.68	359	103	100.6	100.7	98.4	99.3	98	101.433	98.5667	-	1.02908	0.0304007
O14974	PPP1R12A	Protein phosphatase 1 regulatory subunit 12A OS=Homo sapiens OX=9606 GN=PPP1R12A PE=1 SV=1	14	15	18	15	1030	115.2	5.4	209	99.9	104.5	99.9	100.5	95.9	99.3	101.433	98.5667	-	1.02908	0.236683
Q9BS16	CENPK	Centromere protein K OS=Homo sapiens OX=9606 GN=CENPK PE=1 SV=1	3	1	2	1	269	31.6	4.89	17	101.2	98.8	104.3	99.5	99.1	97.1	101.433	98.5667	-	1.02908	0.178023
P62906	RPL10A	60S ribosomal protein L10a OS=Homo sapiens OX=9606 GN=RPL10A PE=1 SV=2	37	9	51	9	217	24.8	9.94	651	96.2	105.7	102.4	97.3	99.4	99	101.433	98.5667	-	1.02908	0.37262
Q8N1S5	SLC39A11	Zinc transporter ZIP11 OS=Homo sapiens OX=9606 GN=SLC39A11 PE=2 SV=3	2	1	1	1	342	35.4	5.6	0	103.2	102.4	98.7	93.3	101.6	100.8	101.433	98.5667	-	1.02908	0.391228
Q9BSY4	CHCHD5	Coiled-coil-helix-coiled-coil-helix domain-containing protein 5 OS=Homo sapiens OX=9606 GN=CHCHD5 PE=1 SV=1	36	3	3	3	110	12.4	6.73	39	98.9	105.1	100.3	91.2	102.5	102	101.433	98.5667	-	1.02908	0.526452
Q14978	NOLC1	Nucleolar and coiled-body phosphoprotein 1 OS=Homo sapiens OX=9606 GN=NOLC1 PE=1 SV=2	22	17	45	17	699	73.6	9.47	199	100.3	103	101	101.9	97.1	96.7	101.433	98.5667	-	1.02908	0.197385
Q9NYH9	UTP6	U3 small nucleolar RNA-associated protein 6 homolog OS=Homo sapiens OX=9606 GN=UTP6 PE=2 SV=2	19	11	20	11	597	70.1	7.28	259	102.1	101.9	100.3	97.1	99.1	99.5	101.433	98.5667	-	1.02908	0.0375256
Q9H8V3	ECT2	Protein ECT2 OS=Homo sapiens OX=9606 GN=ECT2 PE=1 SV=4	10	8	10	8	914	103.4	7.71	103	101.1	105.7	97.5	97	97	101.7	101.433	98.5667	-	1.02908	0.370419
Q96ST2	IWS1	Protein IWS1 homolog OS=Homo sapiens OX=9606 GN=IWS1 PE=1 SV=2	5	4	5	4	819	91.9	4.69	53	100.8	101.2	102.3	97.7	98.5	99.5	101.433	98.5667	-	1.02908	0.0140129
O15498	YKT6	Synaptobrevin homolog YKT6 OS=Homo sapiens OX=9606 GN=YKT6 PE=1 SV=1	38	8	19	8	198	22.4	6.92	166	111.4	90.4	102.5	100.5	97.3	97.9	101.433	98.5667	-	1.02908	0.66609
Q9Y224	RTRAF	RNA transcription, translation and transport factor protein OS=Homo sapiens OX=9606 GN=RTRAF PE=1 SV=1	30	8	19	8	244	28.1	6.65	140	100.4	102.1	101.8	100.1	99.7	95.9	101.433	98.5667	-	1.02908	0.116833
Q9H8H0	NOL11	Nucleolar protein 11 OS=Homo sapiens OX=9606 GN=NOL11 PE=1 SV=1	14	10	24	10	719	81.1	6.07	306	101.8	102.9	99.6	95.8	100.7	99.2	101.433	98.5667	-	1.02908	0.175615
P10586	PTPRF	Receptor-type tyrosine-protein phosphatase F OS=Homo sapiens OX=9606 GN=PTPRF PE=1 SV=2	7	10	11	10	1907	212.7	6.3	66	105.1	99.7	99.5	101.8	96	97.9	101.433	98.5667	-	1.02908	0.316423
Q14517	FAT1	Protocadherin Fat 1 OS=Homo sapiens OX=9606 GN=FAT1 PE=1 SV=2	2	7	7	7	4588	506	5	27	101.1	102.1	101	99	98.5	98.2	101.4	98.5667	-	1.02875	0.00255371
Q9H6E4	CCDC134	Coiled-coil domain-containing protein 134 OS=Homo sapiens OX=9606 GN=CCDC134 PE=1 SV=1	28	5	9	5	229	26.5	8.85	149	108.6	97.3	98.3	101	96.9	97.8	101.4	98.5667	-	1.02875	0.499431
Q8N3C0	ASCC3	Activating signal cointegrator 1 complex subunit 3 OS=Homo sapiens OX=9606 GN=ASCC3 PE=1 SV=3	2	4	4	4	2202	251.3	7.09	78	100.8	101.2	102.2	95.7	98	102	101.4	98.5667	-	1.02875	0.207649
Q96C36	PYCR2	Pyrroline-5-carboxylate reductase 2 OS=Homo sapiens OX=9606 GN=PYCR2 PE=1 SV=1	29	9	28	8	320	33.6	7.77	479	101.2	101.3	101.8	99.5	98.2	98.1	101.433	98.6	-	1.02874	0.00436584
Q96S44	TP53RK	EKC/KEOPS complex subunit TP53RK OS=Homo sapiens OX=9606 GN=TP53RK PE=1 SV=2	8	1	1	1	253	28.1	9.54	55	98.5	105	100.8	94	103.1	98.7	101.433	98.6	-	1.02874	0.431758
Q6P0N0	MIS18BP1	Mis18-binding protein 1 OS=Homo sapiens OX=9606 GN=MIS18BP1 PE=1 SV=1	4	4	5	4	1132	129	9.25	32	98.5	105.5	100.3	97.7	99.8	98.3	101.433	98.6	-	1.02874	0.265328
Q8NBX0	SCCPDH	Saccharopine dehydrogenase-like oxidoreductase OS=Homo sapiens OX=9606 GN=SCCPDH PE=1 SV=1	13	5	16	5	429	47.1	9.14	241	102.3	104.1	97.9	98.8	99.9	97.1	101.433	98.6	-	1.02874	0.232138
Q9NWS8	RMND1	Required for meiotic nuclear division protein 1 homolog OS=Homo sapiens OX=9606 GN=RMND1 PE=1 SV=2	12	5	7	5	449	51.6	8.69	61	103.1	100.4	100.8	97.1	100.9	97.8	101.433	98.6	-	1.02874	0.120338
Q9NZB2	FAM120A	Constitutive coactivator of PPAR-gamma-like protein 1 OS=Homo sapiens OX=9606 GN=FAM120A PE=1 SV=2	14	12	20	12	1118	121.8	8.88	254	100.2	102	102.1	93	103.3	99.5	101.433	98.6	-	1.02874	0.408275
P00167	CYB5A	Cytochrome b5 OS=Homo sapiens OX=9606 GN=CYB5A PE=1 SV=2	49	5	11	5	134	15.3	4.96	249	100.9	102.2	101.1	98.1	98.1	99.6	101.4	98.6	-	1.0284	0.0121076
Q15311	RALBP1	RalA-binding protein 1 OS=Homo sapiens OX=9606 GN=RALBP1 PE=1 SV=3	1	1	1	1	655	76	5.88	0	103.1	97.1	104	98.9	103.3	93.6	101.4	98.6	-	1.0284	0.473581
Q9BUJ2	HNRNPUL1	Heterogeneous nuclear ribonucleoprotein U-like protein 1 OS=Homo sapiens OX=9606 GN=HNRNPUL1 PE=1 SV=2	13	10	27	10	856	95.7	6.92	197	97.3	102.8	104.1	99.7	99	97.1	101.4	98.6	-	1.0284	0.276517
Q9UBW8	COPS7A	COP9 signalosome complex subunit 7a OS=Homo sapiens OX=9606 GN=COPS7A PE=1 SV=1	10	3	3	3	275	30.3	8.22	15	100.4	98.7	105.1	100.6	96.9	98.3	101.4	98.6	-	1.0284	0.271497
Q96BM9	ARL8A	ADP-ribosylation factor-like protein 8A OS=Homo sapiens OX=9606 GN=ARL8A PE=1 SV=1	35	7	22	4	186	21.4	7.77	337	99.6	99.7	104.9	97.5	98.3	100	101.4	98.6	-	1.0284	0.214398
P52272	HNRNPM	Heterogeneous nuclear ribonucleoprotein M OS=Homo sapiens OX=9606 GN=HNRNPM PE=1 SV=3	53	37	139	37	730	77.5	8.7	1952	103.6	102.2	98.4	99.4	98.1	98.3	101.4	98.6	-	1.0284	0.156046
Q9Y2K7	KDM2A	Lysine-specific demethylase 2A OS=Homo sapiens OX=9606 GN=KDM2A PE=1 SV=3	18	18	27	18	1162	132.7	7.58	101	102.1	103.7	98.4	100.3	96.3	99.2	101.4	98.6	-	1.0284	0.228558
P17900	GM2A	Ganglioside GM2 activator OS=Homo sapiens OX=9606 GN=GM2A PE=1 SV=4	23	5	9	5	193	20.8	5.31	24	106.9	95.9	101.4	103.7	97.7	94.4	101.4	98.6	-	1.0284	0.539864
Q8N335	GPD1L	Glycerol-3-phosphate dehydrogenase 1-like protein OS=Homo sapiens OX=9606 GN=GPD1L PE=1 SV=1	14	4	4	4	351	38.4	7.02	0	103.5	102.4	98.3	103	99.9	92.9	101.4	98.6	-	1.0284	0.45405
P49458	SRP9	Signal recognition particle 9 kDa protein OS=Homo sapiens OX=9606 GN=SRP9 PE=1 SV=2	63	6	35	6	86	10.1	7.97	447	101.4	103.5	99.3	97.4	100	98.4	101.4	98.6	-	1.0284	0.121723
Q14839	CHD4	Chromodomain-helicase-DNA-binding protein 4 OS=Homo sapiens OX=9606 GN=CHD4 PE=1 SV=2	16	25	42	20	1912	217.9	5.86	645	98.6	103.8	101.8	99.5	97.9	98.4	101.4	98.6	-	1.0284	0.152325
P49454	CENPF	Centromere protein F OS=Homo sapiens OX=9606 GN=CENPF PE=1 SV=3	23	69	108	69	3114	357.3	5.1	975	102.4	103.3	98.5	102.4	95.9	97.5	101.4	98.6	-	1.0284	0.316532
P51659	HSD17B4	Peroxisomal multifunctional enzyme type 2 OS=Homo sapiens OX=9606 GN=HSD17B4 PE=1 SV=3	43	29	92	29	736	79.6	8.84	1578	103.4	103	97.7	101.3	97	97.5	101.367	98.6	-	1.02806	0.292483
P54920	NAPA	Alpha-soluble NSF attachment protein OS=Homo sapiens OX=9606 GN=NAPA PE=1 SV=3	42	12	26	12	295	33.2	5.36	450	101.7	102.1	100.4	98.9	99.3	97.7	101.4	98.6333	-	1.02805	0.0170373
Q05639	EEF1A2	Elongation factor 1-alpha 2 OS=Homo sapiens OX=9606 GN=EEF1A2 PE=1 SV=1	21	9	53	1	463	50.4	9.03	493	101	97	106.2	95.5	101.2	99.2	101.4	98.6333	-	1.02805	0.428484
Q9NW15	ANO10	Anoctamin-10 OS=Homo sapiens OX=9606 GN=ANO10 PE=1 SV=2	10	7	17	6	660	76.3	7.4	196	102.7	103.5	98	100.8	95.9	99.2	101.4	98.6333	-	1.02805	0.284656
P15848	ARSB	Arylsulfatase B OS=Homo sapiens OX=9606 GN=ARSB PE=1 SV=1	2	1	1	1	533	59.6	8.21	14	108.2	95.2	100.8	105.4	99.8	90.7	101.4	98.6333	-	1.02805	0.652944
Q8N3Z3	GTPBP8	GTP-binding protein 8 OS=Homo sapiens OX=9606 GN=GTPBP8 PE=2 SV=1	11	3	5	3	284	32.1	9.42	0	104.2	100.8	99.1	101.3	98.3	96.3	101.367	98.6333	-	1.02771	0.260609
P16989	YBX3	Y-box-binding protein 3 OS=Homo sapiens OX=9606 GN=YBX3 PE=1 SV=4	34	9	40	6	372	40.1	9.77	883	99.3	100.7	104.1	98.6	99	98.3	101.367	98.6333	-	1.02771	0.130422
Q99536	VAT1	Synaptic vesicle membrane protein VAT-1 homolog OS=Homo sapiens OX=9606 GN=VAT1 PE=1 SV=2	31	11	33	11	393	41.9	6.29	636	100.2	99.9	104	95.3	100.7	99.9	101.367	98.6333	-	1.02771	0.270283
P20674	COX5A	Cytochrome c oxidase subunit 5A, mitochondrial OS=Homo sapiens OX=9606 GN=COX5A PE=1 SV=2	22	5	24	5	150	16.8	6.79	362	101.8	101.6	100.7	100.6	97.4	97.9	101.367	98.6333	-	1.02771	0.0598272
P48730	CSNK1D	Casein kinase I isoform delta OS=Homo sapiens OX=9606 GN=CSNK1D PE=1 SV=2	5	2	2	2	415	47.3	9.74	21	102.5	104.3	97.3	99.7	96.4	99.8	101.367	98.6333	-	1.02771	0.314333
Q16222	UAP1	UDP-N-acetylhexosamine pyrophosphorylase OS=Homo sapiens OX=9606 GN=UAP1 PE=1 SV=3	12	5	8	5	522	58.7	6.33	129	105.2	92.1	106.8	99.4	97.2	99.3	101.367	98.6333	-	1.02771	0.592909
Q9UPT9	USP22	Ubiquitin carboxyl-terminal hydrolase 22 OS=Homo sapiens OX=9606 GN=USP22 PE=1 SV=2	1	1	2	1	525	59.9	8.05	42	100.6	102.2	101.3	95.4	97.7	102.8	101.367	98.6333	-	1.02771	0.28848
Q03188	CENPC	Centromere protein C OS=Homo sapiens OX=9606 GN=CENPC PE=1 SV=2	7	6	8	6	943	106.8	9.39	83	98	96.8	109.3	99.3	94.3	102.3	101.367	98.6333	-	1.02771	0.585532
O95182	NDUFA7	NADH dehydrogenase [ubiquinone] 1 alpha subcomplex subunit 7 OS=Homo sapiens OX=9606 GN=NDUFA7 PE=1 SV=3	59	6	12	6	113	12.5	10.18	174	103.1	103.4	97.6	95.8	102.1	98	101.367	98.6333	-	1.02771	0.358763
Q9HCS7	XAB2	Pre-mRNA-splicing factor SYF1 OS=Homo sapiens OX=9606 GN=XAB2 PE=1 SV=2	25	19	25	19	855	99.9	6.23	342	99.3	100.8	104	97.8	97.5	100.6	101.367	98.6333	-	1.02771	0.183483
Q9H3P7	ACBD3	Golgi resident protein GCP60 OS=Homo sapiens OX=9606 GN=ACBD3 PE=1 SV=4	18	7	11	7	528	60.6	5.06	242	106.9	98.4	98.8	90.1	99.7	106.1	101.367	98.6333	-	1.02771	0.640056
Q9BTV4	TMEM43	Transmembrane protein 43 OS=Homo sapiens OX=9606 GN=TMEM43 PE=1 SV=1	34	16	52	16	400	44.8	8.13	354	102.3	101.1	100.6	97.5	99.3	99.1	101.333	98.6333	-	1.02737	0.0238269
Q06210	GFPT1	Glutamine--fructose-6-phosphate aminotransferase [isomerizing] 1 OS=Homo sapiens OX=9606 GN=GFPT1 PE=1 SV=3	29	17	32	14	699	78.8	7.11	260	105.6	96	102.4	99.1	96.7	100.1	101.333	98.6333	-	1.02737	0.418585
Q8TCT9	HM13	Minor histocompatibility antigen H13 OS=Homo sapiens OX=9606 GN=HM13 PE=1 SV=1	23	9	60	9	377	41.5	6.43	886	102.8	103.3	97.9	98.6	97.1	100.2	101.333	98.6333	-	1.02737	0.236667
Q7Z3K3	POGZ	Pogo transposable element with ZNF domain OS=Homo sapiens OX=9606 GN=POGZ PE=1 SV=2	10	10	16	10	1410	155.2	7.4	342	98.3	103.2	102.5	96.9	98.2	100.8	101.333	98.6333	-	1.02737	0.230756
Q8WUM0	NUP133	Nuclear pore complex protein Nup133 OS=Homo sapiens OX=9606 GN=NUP133 PE=1 SV=2	27	26	64	26	1156	128.9	5.1	889	100.3	100.8	103	97.4	98.9	99.7	101.367	98.6667	-	1.02736	0.0649183
P40939	HADHA	Trifunctional enzyme subunit alpha, mitochondrial OS=Homo sapiens OX=9606 GN=HADHA PE=1 SV=2	37	25	116	25	763	82.9	9.04	1415	103.6	102.4	98.1	98.5	99.2	98.3	101.367	98.6667	-	1.02736	0.185739
Q9NZM5	NOP53	Ribosome biogenesis protein NOP53 OS=Homo sapiens OX=9606 GN=NOP53 PE=1 SV=2	17	7	12	7	478	54.4	10.32	133	96.8	102.9	104.4	99.8	97.8	98.4	101.367	98.6667	-	1.02736	0.32324
P30260	CDC27	Cell division cycle protein 27 homolog OS=Homo sapiens OX=9606 GN=CDC27 PE=1 SV=2	11	8	10	8	824	91.8	7.02	53	94.8	111.5	97.8	96.1	100.5	99.4	101.367	98.6667	-	1.02736	0.637724
P08174	CD55	Complement decay-accelerating factor OS=Homo sapiens OX=9606 GN=CD55 PE=1 SV=4	30	13	34	13	381	41.4	7.59	308	102.1	102.5	99.5	99.7	99.9	96.4	101.367	98.6667	-	1.02736	0.14091
Q8TEY7	USP33	Ubiquitin carboxyl-terminal hydrolase 33 OS=Homo sapiens OX=9606 GN=USP33 PE=1 SV=2	1	1	1	1	942	106.7	6.02	32	100.6	113.1	90.4	103.1	93	99.9	101.367	98.6667	-	1.02736	0.727017
Q6Y7W6	GIGYF2	GRB10-interacting GYF protein 2 OS=Homo sapiens OX=9606 GN=GIGYF2 PE=1 SV=1	7	8	11	8	1299	150	5.54	155	96.4	105.8	101.9	98.7	96.5	100.8	101.367	98.6667	-	1.02736	0.418427
Q86UP2	KTN1	Kinectin OS=Homo sapiens OX=9606 GN=KTN1 PE=1 SV=1	53	74	213	74	1357	156.2	5.64	2902	101.8	101.1	101.2	100.2	98.5	97.3	101.367	98.6667	-	1.02736	0.0360038
Q6P158	DHX57	Putative ATP-dependent RNA helicase DHX57 OS=Homo sapiens OX=9606 GN=DHX57 PE=1 SV=2	4	5	6	4	1386	155.5	7.71	42	114.2	88.5	101.3	94.8	94.8	106.4	101.333	98.6667	-	1.02703	0.76587
Q93074	MED12	Mediator of RNA polymerase II transcription subunit 12 OS=Homo sapiens OX=9606 GN=MED12 PE=1 SV=4	3	6	8	6	2177	242.9	7.05	17	95.9	99.7	108.4	97.5	97.6	100.9	101.333	98.6667	-	1.02703	0.528132
O75489	NDUFS3	NADH dehydrogenase [ubiquinone] iron-sulfur protein 3, mitochondrial OS=Homo sapiens OX=9606 GN=NDUFS3 PE=1 SV=1	48	12	27	12	264	30.2	7.5	341	102.3	102.4	99.3	95	98.2	102.8	101.333	98.6667	-	1.02703	0.343084
P31942	HNRNPH3	Heterogeneous nuclear ribonucleoprotein H3 OS=Homo sapiens OX=9606 GN=HNRNPH3 PE=1 SV=2	43	10	89	9	346	36.9	6.87	1625	99.8	102.2	102	99.9	97.6	98.5	101.333	98.6667	-	1.02703	0.0590294
P12956	XRCC6	X-ray repair cross-complementing protein 6 OS=Homo sapiens OX=9606 GN=XRCC6 PE=1 SV=2	40	24	121	24	609	69.8	6.64	1693	97.8	105.7	100.5	95.8	100.4	99.8	101.333	98.6667	-	1.02703	0.384149
Q14108	SCARB2	Lysosome membrane protein 2 OS=Homo sapiens OX=9606 GN=SCARB2 PE=1 SV=2	14	8	29	8	478	54.3	5.14	387	103.5	100.8	99.7	100.4	99.1	96.5	101.333	98.6667	-	1.02703	0.172791
Q9Y291	MRPS33	28S ribosomal protein S33, mitochondrial OS=Homo sapiens OX=9606 GN=MRPS33 PE=1 SV=1	28	3	6	3	106	12.6	10.11	29	97.9	103.8	102.3	100.5	100.4	95.1	101.333	98.6667	-	1.02703	0.348457
P04040	CAT	Catalase OS=Homo sapiens OX=9606 GN=CAT PE=1 SV=3	48	23	71	23	527	59.7	7.39	1012	105.1	99.6	99.3	99.9	98	98.1	101.333	98.6667	-	1.02703	0.250057
Q8WUQ7	CACTIN	Cactin OS=Homo sapiens OX=9606 GN=CACTIN PE=1 SV=3	1	1	1	1	758	88.6	9.14	25	101.1	95.2	107.6	97.2	100.1	98.7	101.3	98.6667	-	1.02669	0.513537
P11310	ACADM	Medium-chain specific acyl-CoA dehydrogenase, mitochondrial OS=Homo sapiens OX=9606 GN=ACADM PE=1 SV=1	31	11	46	11	421	46.6	8.37	448	103.5	100	100.4	100.7	97.5	97.8	101.3	98.6667	-	1.02669	0.155026
Q5T9A4	ATAD3B	ATPase family AAA domain-containing protein 3B OS=Homo sapiens OX=9606 GN=ATAD3B PE=1 SV=1	41	26	90	10	648	72.5	9.2	1398	97.9	101.1	104.9	97.2	97.3	101.5	101.3	98.6667	-	1.02669	0.346448
P78362	SRPK2	SRSF protein kinase 2 OS=Homo sapiens OX=9606 GN=SRPK2 PE=1 SV=3	3	2	2	1	688	77.5	4.97	14	101.8	97.5	104.6	98.6	101.1	96.3	101.3	98.6667	-	1.02669	0.349352
P61009	SPCS3	Signal peptidase complex subunit 3 OS=Homo sapiens OX=9606 GN=SPCS3 PE=1 SV=1	22	4	10	4	180	20.3	8.62	164	102.5	104.1	97.4	99	98.5	98.6	101.333	98.7	-	1.02668	0.263512
P46779	RPL28	60S ribosomal protein L28 OS=Homo sapiens OX=9606 GN=RPL28 PE=1 SV=3	39	7	27	7	137	15.7	12.02	347	96.2	105.4	102.4	96.5	100.7	98.9	101.333	98.7	-	1.02668	0.425287
Q8NFQ8	TOR1AIP2	Torsin-1A-interacting protein 2 OS=Homo sapiens OX=9606 GN=TOR1AIP2 PE=1 SV=1	17	7	16	6	470	51.2	4.96	225	101.1	102.1	100.8	99.9	99.2	97	101.333	98.7	-	1.02668	0.0514399
Q9UNM6	PSMD13	26S proteasome non-ATPase regulatory subunit 13 OS=Homo sapiens OX=9606 GN=PSMD13 PE=1 SV=2	31	11	28	11	376	42.9	5.81	220	96.7	90.4	116.9	94.2	97.8	104.1	101.333	98.7	-	1.02668	0.772191
Q9H4A4	RNPEP	Aminopeptidase B OS=Homo sapiens OX=9606 GN=RNPEP PE=1 SV=2	8	4	4	4	650	72.5	5.74	57	103.5	95.5	105	101.3	96.4	98.4	101.333	98.7	-	1.02668	0.466272
Q13641	TPBG	Trophoblast glycoprotein OS=Homo sapiens OX=9606 GN=TPBG PE=1 SV=1	13	6	19	6	420	46	6.83	261	101.1	98.3	104.6	99.2	97.3	99.6	101.333	98.7	-	1.02668	0.249366
Q9NPF0	CD320	CD320 antigen OS=Homo sapiens OX=9606 GN=CD320 PE=1 SV=1	13	4	4	4	282	29	4.75	26	102.9	98.7	102.3	99.6	98.7	97.8	101.3	98.7	-	1.02634	0.139099
O60306	AQR	RNA helicase aquarius OS=Homo sapiens OX=9606 GN=AQR PE=1 SV=4	15	24	36	23	1485	171.2	6.37	189	101.7	101.4	100.8	99.5	97.5	99.1	101.3	98.7	-	1.02634	0.0174692
Q8TBX8	PIP4K2C	Phosphatidylinositol 5-phosphate 4-kinase type-2 gamma OS=Homo sapiens OX=9606 GN=PIP4K2C PE=1 SV=3	15	5	5	5	421	47.3	6.84	117	98.4	97.6	107.9	94.8	101.1	100.2	101.3	98.7	-	1.02634	0.536377
P53985	SLC16A1	Monocarboxylate transporter 1 OS=Homo sapiens OX=9606 GN=SLC16A1 PE=1 SV=3	13	7	16	7	500	53.9	8.66	130	102.2	104.4	97.3	101.1	97.8	97.2	101.3	98.7	-	1.02634	0.34376
P26373	RPL13	60S ribosomal protein L13 OS=Homo sapiens OX=9606 GN=RPL13 PE=1 SV=4	34	9	48	9	211	24.2	11.65	588	94.4	103.5	106	98	100.6	97.5	101.3	98.7	-	1.02634	0.515966
O00468	AGRN	Agrin OS=Homo sapiens OX=9606 GN=AGRN PE=1 SV=6	15	23	29	23	2068	217.2	6.39	392	105.2	101	97.7	99.6	97.9	98.6	101.3	98.7	-	1.02634	0.307597
Q8IUC4	RHPN2	Rhophilin-2 OS=Homo sapiens OX=9606 GN=RHPN2 PE=1 SV=1	15	9	11	9	686	76.9	6.8	89	107	94.7	102.2	94.4	101	100.7	101.3	98.7	-	1.02634	0.567291
Q96A57	TMEM230	Transmembrane protein 230 OS=Homo sapiens OX=9606 GN=TMEM230 PE=1 SV=1	37	4	8	4	120	13.2	9.31	66	96.6	107.2	100.1	98.6	98.5	99	101.3	98.7	-	1.02634	0.451788
Q9HBR0	SLC38A10	Putative sodium-coupled neutral amino acid transporter 10 OS=Homo sapiens OX=9606 GN=SLC38A10 PE=1 SV=2	5	4	5	4	1119	119.7	5.73	40	106.2	96.7	101	96.6	98.5	101	101.3	98.7	-	1.02634	0.438893
P35232	PHB	Prohibitin OS=Homo sapiens OX=9606 GN=PHB PE=1 SV=1	48	14	84	14	272	29.8	5.76	1487	100	101.9	102	99.8	98.2	98.1	101.3	98.7	-	1.02634	0.0380267
Q96RD6	PANX2	Pannexin-2 OS=Homo sapiens OX=9606 GN=PANX2 PE=2 SV=2	1	1	2	1	677	74.4	8.02	23	103.6	99	101.3	101.1	96.5	98.5	101.3	98.7	-	1.02634	0.238984
P53041	PPP5C	Serine/threonine-protein phosphatase 5 OS=Homo sapiens OX=9606 GN=PPP5C PE=1 SV=1	1	1	2	1	499	56.8	6.28	14	103.9	94.6	105.4	99.9	98.6	97.6	101.3	98.7	-	1.02634	0.492167
O95785	WIZ	Protein Wiz OS=Homo sapiens OX=9606 GN=WIZ PE=1 SV=2	3	3	3	3	1651	178.6	6.86	33	100.3	102.2	101.4	99.7	98.3	98.1	101.3	98.7	-	1.02634	0.0252421
P62140	PPP1CB	Serine/threonine-protein phosphatase PP1-beta catalytic subunit OS=Homo sapiens OX=9606 GN=PPP1CB PE=1 SV=3	38	10	32	3	327	37.2	6.19	306	100	101	102.9	94.7	92.4	109	101.3	98.7	-	1.02634	0.647122
O75494	SRSF10	Serine/arginine-rich splicing factor 10 OS=Homo sapiens OX=9606 GN=SRSF10 PE=1 SV=1	27	9	25	9	262	31.3	11.27	158	104	101.8	98.1	100.2	98.8	97.1	101.3	98.7	-	1.02634	0.251403
P18124	RPL7	60S ribosomal protein L7 OS=Homo sapiens OX=9606 GN=RPL7 PE=1 SV=1	38	12	53	12	248	29.2	10.65	454	97.1	104.6	102.2	95.5	101.5	99.1	101.3	98.7	-	1.02634	0.408111
Q7Z6I8	C5orf24	UPF0461 protein C5orf24 OS=Homo sapiens OX=9606 GN=C5orf24 PE=1 SV=1	12	2	3	2	188	20.1	9.85	32	99.6	105.5	98.8	99.5	97.3	99.3	101.3	98.7	-	1.02634	0.307738
P78527	PRKDC	DNA-dependent protein kinase catalytic subunit OS=Homo sapiens OX=9606 GN=PRKDC PE=1 SV=3	26	98	277	98	4128	468.8	7.12	3874	102.3	101.8	99.8	97.8	99.9	98.4	101.3	98.7	-	1.02634	0.0578596
Q5JRX3	PITRM1	Presequence protease, mitochondrial OS=Homo sapiens OX=9606 GN=PITRM1 PE=1 SV=3	30	28	67	28	1037	117.3	6.92	692	102.9	97.6	103.4	98.8	97.3	100	101.3	98.7	-	1.02634	0.266131
Q9NXF1	TEX10	Testis-expressed protein 10 OS=Homo sapiens OX=9606 GN=TEX10 PE=1 SV=2	22	19	34	19	929	105.6	9.36	328	102.9	101.1	99.9	98.1	99.1	98.9	101.3	98.7	-	1.02634	0.0480922
P57105	SYNJ2BP	Synaptojanin-2-binding protein OS=Homo sapiens OX=9606 GN=SYNJ2BP PE=1 SV=2	39	5	12	5	145	15.9	6.3	137	96.4	101.3	106.1	95.4	98.7	102	101.267	98.7	-	1.026	0.490751
Q9NY12	GAR1	H/ACA ribonucleoprotein complex subunit 1 OS=Homo sapiens OX=9606 GN=GAR1 PE=1 SV=1	32	6	12	6	217	22.3	10.92	41	99.9	103.5	100.4	100	99.4	96.7	101.267	98.7	-	1.026	0.165665
Q8IWX8	CHERP	Calcium homeostasis endoplasmic reticulum protein OS=Homo sapiens OX=9606 GN=CHERP PE=1 SV=3	12	11	23	11	916	103.6	9.04	176	97.3	102.4	104.1	100.6	96.8	98.7	101.267	98.7	-	1.026	0.33046
O75746	SLC25A12	Calcium-binding mitochondrial carrier protein Aralar1 OS=Homo sapiens OX=9606 GN=SLC25A12 PE=1 SV=2	35	22	61	15	678	74.7	8.38	792	102.6	102.2	99	100	97.1	99	101.267	98.7	-	1.026	0.145322
P56962	STX17	Syntaxin-17 OS=Homo sapiens OX=9606 GN=STX17 PE=1 SV=2	5	1	1	1	302	33.4	6.57	24	101.3	94.6	107.9	96.4	96	103.7	101.267	98.7	-	1.026	0.605336
Q86V81	ALYREF	THO complex subunit 4 OS=Homo sapiens OX=9606 GN=ALYREF PE=1 SV=3	32	7	33	7	257	26.9	11.15	887	98.8	105	100	102.1	97	97	101.267	98.7	-	1.026	0.370838
P39748	FEN1	Flap endonuclease 1 OS=Homo sapiens OX=9606 GN=FEN1 PE=1 SV=1	21	8	18	8	380	42.6	8.62	177	94.7	102.3	106.8	95.2	98.9	102	101.267	98.7	-	1.026	0.55986
Q13610	PWP1	Periodic tryptophan protein 1 homolog OS=Homo sapiens OX=9606 GN=PWP1 PE=1 SV=1	9	4	7	4	501	55.8	4.77	136	101.5	102.7	99.6	99.9	97.7	98.5	101.267	98.7	-	1.026	0.0814597
P46776	RPL27A	60S ribosomal protein L27a OS=Homo sapiens OX=9606 GN=RPL27A PE=1 SV=2	41	7	31	7	148	16.6	11	353	96.2	102.3	105.3	95.6	100.4	100.1	101.267	98.7	-	1.026	0.453531
Q96RE7	NACC1	Nucleus accumbens-associated protein 1 OS=Homo sapiens OX=9606 GN=NACC1 PE=1 SV=1	7	3	3	3	527	57.2	5.74	31	98.4	97.2	108.2	97.5	103.8	94.8	101.267	98.7	-	1.026	0.589938
Q13148	TARDBP	TAR DNA-binding protein 43 OS=Homo sapiens OX=9606 GN=TARDBP PE=1 SV=1	14	6	18	6	414	44.7	6.19	488	102.4	103.5	97.9	99.3	98.7	98.1	101.267	98.7	-	1.026	0.215864
P36957	DLST	Dihydrolipoyllysine-residue succinyltransferase component of 2-oxoglutarate dehydrogenase complex, mitochondrial OS=Homo sapiens OX=9606 GN=DLST PE=1 SV=4	35	14	38	14	453	48.7	8.95	592	104.4	100.6	98.9	98.5	99.6	98.1	101.3	98.7333	-	1.026	0.202701
P42765	ACAA2	3-ketoacyl-CoA thiolase, mitochondrial OS=Homo sapiens OX=9606 GN=ACAA2 PE=1 SV=2	47	16	56	16	397	41.9	8.09	1208	104.6	100.7	98.6	100.4	98.5	97.3	101.3	98.7333	-	1.026	0.26378
P38606	ATP6V1A	V-type proton ATPase catalytic subunit A OS=Homo sapiens OX=9606 GN=ATP6V1A PE=1 SV=2	20	13	27	13	617	68.3	5.52	237	95.4	101.3	107.2	95.7	99.9	100.6	101.3	98.7333	-	1.026	0.52965
Q6PGP7	TTC37	Tetratricopeptide repeat protein 37 OS=Homo sapiens OX=9606 GN=TTC37 PE=1 SV=1	4	6	6	6	1564	175.4	7.53	0	101.7	98.5	103.7	98.8	98	99.4	101.3	98.7333	-	1.026	0.176933
Q9Y371	SH3GLB1	Endophilin-B1 OS=Homo sapiens OX=9606 GN=SH3GLB1 PE=1 SV=1	18	8	15	7	365	40.8	6.04	66	109.6	93.2	101.1	97.4	100.7	98.1	101.3	98.7333	-	1.026	0.624015
Q9H7D0	DOCK5	Dedicator of cytokinesis protein 5 OS=Homo sapiens OX=9606 GN=DOCK5 PE=1 SV=3	8	17	21	17	1870	215.2	7.96	85	99.6	99	105.1	96.6	99.5	100	101.233	98.7	-	1.02567	0.315885
Q5VTR2	RNF20	E3 ubiquitin-protein ligase BRE1A OS=Homo sapiens OX=9606 GN=RNF20 PE=1 SV=2	9	8	8	5	975	113.6	5.94	79	101.3	101.7	100.8	97.1	96.8	102.3	101.267	98.7333	-	1.02566	0.232985
P43155	CRAT	Carnitine O-acetyltransferase OS=Homo sapiens OX=9606 GN=CRAT PE=1 SV=5	20	12	18	12	626	70.8	8.44	116	102.4	101.7	99.7	98.5	97.5	100.2	101.267	98.7333	-	1.02566	0.0883209
O14579	COPE	Coatomer subunit epsilon OS=Homo sapiens OX=9606 GN=COPE PE=1 SV=3	26	6	11	6	308	34.5	5.12	181	99.4	104.1	100.3	96.8	98.8	100.6	101.267	98.7333	-	1.02566	0.234368
Q96BI3	APH1A	Gamma-secretase subunit APH-1A OS=Homo sapiens OX=9606 GN=APH1A PE=1 SV=1	5	2	4	2	265	29	7.9	128	102.2	100.6	101	95.1	100.4	100.7	101.267	98.7333	-	1.02566	0.249332
Q96BP3	PPWD1	Peptidylprolyl isomerase domain and WD repeat-containing protein 1 OS=Homo sapiens OX=9606 GN=PPWD1 PE=1 SV=1	13	8	11	8	646	73.5	7.15	108	100.8	97.6	105.4	97.9	100.5	97.8	101.267	98.7333	-	1.02566	0.356054
P31943	HNRNPH1	Heterogeneous nuclear ribonucleoprotein H OS=Homo sapiens OX=9606 GN=HNRNPH1 PE=1 SV=4	45	16	144	8	449	49.2	6.3	2896	99.2	102.7	101.9	98.4	97.9	99.9	101.267	98.7333	-	1.02566	0.105924
Q5JVS0	HABP4	Intracellular hyaluronan-binding protein 4 OS=Homo sapiens OX=9606 GN=HABP4 PE=1 SV=1	7	2	2	2	413	45.8	7.46	20	106.1	102.3	95.4	108.3	105.9	82	101.267	98.7333	-	1.02566	0.791415
P23919	DTYMK	Thymidylate kinase OS=Homo sapiens OX=9606 GN=DTYMK PE=1 SV=4	26	6	7	6	212	23.8	8.27	23	103.2	98	102.6	99.9	97.7	98.6	101.267	98.7333	-	1.02566	0.223935
P49137	MAPKAPK2	MAP kinase-activated protein kinase 2 OS=Homo sapiens OX=9606 GN=MAPKAPK2 PE=1 SV=1	3	1	1	1	400	45.5	8.68	39	106.4	94.3	103.1	96.2	105.4	94.6	101.267	98.7333	-	1.02566	0.634842
Q7L592	NDUFAF7	Protein arginine methyltransferase NDUFAF7, mitochondrial OS=Homo sapiens OX=9606 GN=NDUFAF7 PE=1 SV=1	29	11	30	11	441	49.2	8.34	273	102.9	99.2	101.6	98.8	98	99.4	101.233	98.7333	-	1.02532	0.0968276
P13073	COX4I1	Cytochrome c oxidase subunit 4 isoform 1, mitochondrial OS=Homo sapiens OX=9606 GN=COX4I1 PE=1 SV=1	47	9	54	9	169	19.6	9.51	582	100.7	102.8	100.2	100.4	96.8	99	101.233	98.7333	-	1.02532	0.130315
Q96CB9	NSUN4	5-methylcytosine rRNA methyltransferase NSUN4 OS=Homo sapiens OX=9606 GN=NSUN4 PE=1 SV=2	14	6	12	6	384	43.1	8.18	49	105.1	100.2	98.4	104.8	95.6	95.8	101.233	98.7333	-	1.02532	0.529396
O95163	ELP1	Elongator complex protein 1 OS=Homo sapiens OX=9606 GN=ELP1 PE=1 SV=3	1	1	1	1	1332	150.2	5.94	0	103.7	95.7	104.3	95.7	99.4	101.1	101.233	98.7333	-	1.02532	0.478019
P05387	RPLP2	60S acidic ribosomal protein P2 OS=Homo sapiens OX=9606 GN=RPLP2 PE=1 SV=1	76	8	42	7	115	11.7	4.54	882	96.8	107.4	99.5	96.6	98.7	100.9	101.233	98.7333	-	1.02532	0.504597
P62424	RPL7A	60S ribosomal protein L7a OS=Homo sapiens OX=9606 GN=RPL7A PE=1 SV=2	45	16	62	16	266	30	10.61	827	93.7	105.9	104.2	97.7	99.8	98.8	101.267	98.7667	-	1.02531	0.552784
Q96Q89	KIF20B	Kinesin-like protein KIF20B OS=Homo sapiens OX=9606 GN=KIF20B PE=1 SV=3	8	13	14	13	1820	210.5	5.67	92	97.5	102.1	104.2	98.7	102.3	95.3	101.267	98.7667	-	1.02531	0.426656
Q86U28	ISCA2	Iron-sulfur cluster assembly 2 homolog, mitochondrial OS=Homo sapiens OX=9606 GN=ISCA2 PE=1 SV=2	31	4	5	4	154	16.5	5.25	112	104.1	98.3	101.3	93.8	98.9	103.6	101.233	98.7667	-	1.02497	0.494874
Q86W50	METTL16	RNA N6-adenosine-methyltransferase METTL16 OS=Homo sapiens OX=9606 GN=METTL16 PE=1 SV=2	4	2	2	2	562	63.6	7.85	25	105.3	98.6	99.8	91.9	102.8	101.6	101.233	98.7667	-	1.02497	0.572678
Q8NCN5	PDPR	Pyruvate dehydrogenase phosphatase regulatory subunit, mitochondrial OS=Homo sapiens OX=9606 GN=PDPR PE=1 SV=2	13	10	17	10	879	99.3	6.35	198	101.4	104.8	97.5	98.4	98.8	99.1	101.233	98.7667	-	1.02497	0.309034
Q8TDN6	BRIX1	Ribosome biogenesis protein BRX1 homolog OS=Homo sapiens OX=9606 GN=BRIX1 PE=1 SV=2	15	7	25	7	353	41.4	9.92	214	99.5	103	101.2	100.7	98.5	97.1	101.233	98.7667	-	1.02497	0.165407
P11234	RALB	Ras-related protein Ral-B OS=Homo sapiens OX=9606 GN=RALB PE=1 SV=1	31	7	14	5	206	23.4	6.62	85	100.7	103.9	99.1	102.1	96.8	97.4	101.233	98.7667	-	1.02497	0.323148
O95202	LETM1	Mitochondrial proton/calcium exchanger protein OS=Homo sapiens OX=9606 GN=LETM1 PE=1 SV=1	27	18	66	18	739	83.3	6.7	1101	101.6	101.8	100.3	99.3	99.4	97.6	101.233	98.7667	-	1.02497	0.030224
Q9Y2H0	DLGAP4	Disks large-associated protein 4 OS=Homo sapiens OX=9606 GN=DLGAP4 PE=1 SV=3	1	1	1	1	992	107.9	7.08	25	100.1	92.6	111	93	103.2	100.1	101.233	98.7667	-	1.02497	0.708233
Q13112	CHAF1B	Chromatin assembly factor 1 subunit B OS=Homo sapiens OX=9606 GN=CHAF1B PE=1 SV=1	8	5	8	5	559	61.5	7.5	90	101.8	102.8	99.1	97.9	100.3	98.1	101.233	98.7667	-	1.02497	0.140845
Q9P275	USP36	Ubiquitin carboxyl-terminal hydrolase 36 OS=Homo sapiens OX=9606 GN=USP36 PE=1 SV=4	5	6	6	6	1123	122.8	9.7	63	102.1	101.7	99.9	99.9	97.6	98.8	101.233	98.7667	-	1.02497	0.0599407
Q9H4L4	SENP3	Sentrin-specific protease 3 OS=Homo sapiens OX=9606 GN=SENP3 PE=1 SV=2	13	7	14	7	574	65	8.56	151	102.1	99.8	101.8	100.5	97.1	98.7	101.233	98.7667	-	1.02497	0.113008
P52907	CAPZA1	F-actin-capping protein subunit alpha-1 OS=Homo sapiens OX=9606 GN=CAPZA1 PE=1 SV=3	54	11	32	10	286	32.9	5.69	565	98.1	103.3	102.3	102.4	97.1	96.8	101.233	98.7667	-	1.02497	0.365304
Q8NE62	CHDH	Choline dehydrogenase, mitochondrial OS=Homo sapiens OX=9606 GN=CHDH PE=1 SV=2	8	5	7	5	594	65.3	8.28	35	101	99.3	103.3	101.1	97.8	97.4	101.2	98.7667	-	1.02464	0.213977
O43818	RRP9	U3 small nucleolar RNA-interacting protein 2 OS=Homo sapiens OX=9606 GN=RRP9 PE=1 SV=1	22	9	20	9	475	51.8	7.85	188	99.6	104.5	99.5	98.9	98.5	98.9	101.2	98.7667	-	1.02464	0.215575
A2RRP1	NBAS	Neuroblastoma-amplified sequence OS=Homo sapiens OX=9606 GN=NBAS PE=1 SV=2	8	16	22	16	2371	268.4	5.96	245	101.4	101.3	101	99.8	98	98.6	101.233	98.8	-	1.02463	0.0109532
Q96RU3	FNBP1	Formin-binding protein 1 OS=Homo sapiens OX=9606 GN=FNBP1 PE=1 SV=2	4	3	4	3	617	71.3	5.72	32	104.3	93.8	105.6	98	98.7	99.7	101.233	98.8	-	1.02463	0.553595
P56545	CTBP2	C-terminal-binding protein 2 OS=Homo sapiens OX=9606 GN=CTBP2 PE=1 SV=1	16	7	16	3	445	48.9	6.95	122	101.1	100.3	102.3	95.6	96.7	104.1	101.233	98.8	-	1.02463	0.423357
Q92542	NCSTN	Nicastrin OS=Homo sapiens OX=9606 GN=NCSTN PE=1 SV=2	9	7	15	7	709	78.4	5.99	143	100.1	102.5	101	99.7	97.9	98.8	101.2	98.8	-	1.02429	0.0512169
Q02252	ALDH6A1	Methylmalonate-semialdehyde dehydrogenase [acylating], mitochondrial OS=Homo sapiens OX=9606 GN=ALDH6A1 PE=1 SV=2	10	5	10	5	535	57.8	8.5	49	106.5	93.4	103.7	100.9	101.2	94.3	101.2	98.8	-	1.02429	0.627618
Q15102	PAFAH1B3	Platelet-activating factor acetylhydrolase IB subunit gamma OS=Homo sapiens OX=9606 GN=PAFAH1B3 PE=1 SV=1	24	4	6	4	231	25.7	6.84	185	107.6	83	113	96.5	96.7	103.2	101.2	98.8	-	1.02429	0.812836
Q86WB0	ZC3HC1	Nuclear-interacting partner of ALK OS=Homo sapiens OX=9606 GN=ZC3HC1 PE=1 SV=1	17	7	10	7	502	55.2	5.62	151	97.9	102.2	103.5	97.7	98	100.7	101.2	98.8	-	1.02429	0.284242
O75410	TACC1	Transforming acidic coiled-coil-containing protein 1 OS=Homo sapiens OX=9606 GN=TACC1 PE=1 SV=2	40	26	43	23	805	87.7	4.88	687	96.4	102.6	104.6	97.1	98.3	101	101.2	98.8	-	1.02429	0.428135
Q9Y5Y5	PEX16	Peroxisomal membrane protein PEX16 OS=Homo sapiens OX=9606 GN=PEX16 PE=1 SV=2	16	5	10	5	336	38.6	9.85	117	103.9	102.6	97.1	98.8	97.1	100.5	101.2	98.8	-	1.02429	0.356312
P18621	RPL17	60S ribosomal protein L17 OS=Homo sapiens OX=9606 GN=RPL17 PE=1 SV=3	35	6	37	6	184	21.4	10.17	422	95.1	104.6	103.9	94.8	101.9	99.7	101.2	98.8	-	1.02429	0.552706
P53992	SEC24C	Protein transport protein Sec24C OS=Homo sapiens OX=9606 GN=SEC24C PE=1 SV=3	7	7	9	7	1094	118.2	7.06	56	100.8	101.6	101.2	94.8	101.8	99.8	101.2	98.8	-	1.02429	0.315733
Q9P2R3	ANKFY1	Rabankyrin-5 OS=Homo sapiens OX=9606 GN=ANKFY1 PE=1 SV=2	4	4	5	4	1169	128.3	6.1	40	90.9	105.6	107.1	105.7	96.4	94.3	101.2	98.8	-	1.02429	0.72024
Q9Y2Q5	LAMTOR2	Ragulator complex protein LAMTOR2 OS=Homo sapiens OX=9606 GN=LAMTOR2 PE=1 SV=1	30	3	8	3	125	13.5	5.4	114	101.2	101.1	101.3	101	95.8	99.6	101.2	98.8	-	1.02429	0.197505
P17706	PTPN2	Tyrosine-protein phosphatase non-receptor type 2 OS=Homo sapiens OX=9606 GN=PTPN2 PE=1 SV=2	15	6	11	6	415	48.4	8.29	155	99	102.5	102.1	98.5	99.1	98.8	101.2	98.8	-	1.02429	0.0986693
Q8N1F7	NUP93	Nuclear pore complex protein Nup93 OS=Homo sapiens OX=9606 GN=NUP93 PE=1 SV=2	32	27	78	27	819	93.4	5.72	752	101.6	100.2	101.8	100.3	98.9	97.2	101.2	98.8	-	1.02429	0.0798348
O96000	NDUFB10	NADH dehydrogenase [ubiquinone] 1 beta subcomplex subunit 10 OS=Homo sapiens OX=9606 GN=NDUFB10 PE=1 SV=3	45	7	17	7	172	20.8	8.48	330	99.6	104.4	99.7	101.3	95.8	99.4	101.233	98.8333	-	1.02428	0.348176
P11216	PYGB	Glycogen phosphorylase, brain form OS=Homo sapiens OX=9606 GN=PYGB PE=1 SV=5	21	18	28	15	843	96.6	6.86	251	102.9	96.2	104.4	98.8	99.3	98.3	101.167	98.8	-	1.02395	0.403748
P30050	RPL12	60S ribosomal protein L12 OS=Homo sapiens OX=9606 GN=RPL12 PE=1 SV=1	64	9	49	9	165	17.8	9.42	788	97	104.7	101.8	96.2	99.2	101	101.167	98.8	-	1.02395	0.42164
P67870	CSNK2B	Casein kinase II subunit beta OS=Homo sapiens OX=9606 GN=CSNK2B PE=1 SV=1	41	7	17	7	215	24.9	5.55	414	97.1	100.2	106.2	99.9	99.5	97	101.167	98.8	-	1.02395	0.448704
P61599	NAA20	N-alpha-acetyltransferase 20 OS=Homo sapiens OX=9606 GN=NAA20 PE=1 SV=1	5	1	1	1	178	20.4	5.03	0	92.1	93.6	117.8	93.5	101.7	101.2	101.167	98.8	-	1.02395	0.799968
Q2TAL8	QRICH1	Glutamine-rich protein 1 OS=Homo sapiens OX=9606 GN=QRICH1 PE=1 SV=1	6	4	4	4	776	86.4	5.87	31	104.3	102.7	96.5	97	95.8	103.6	101.167	98.8	-	1.02395	0.524329
Q86TC9	MYPN	Myopalladin OS=Homo sapiens OX=9606 GN=MYPN PE=1 SV=2	6	7	7	7	1320	145.2	6.77	47	105	98.9	99.6	94.9	99.6	101.9	101.167	98.8	-	1.02395	0.448704
Q9BUR5	APOO	MICOS complex subunit MIC26 OS=Homo sapiens OX=9606 GN=APOO PE=1 SV=1	18	3	8	3	198	22.3	9.13	39	102.8	101.7	99	100.4	100.4	95.6	101.167	98.8	-	1.02395	0.293372
Q96DX4	RSPRY1	RING finger and SPRY domain-containing protein 1 OS=Homo sapiens OX=9606 GN=RSPRY1 PE=1 SV=1	5	2	2	2	576	64.1	5.57	29	99.2	98.8	105.5	99.4	97.6	99.4	101.167	98.8	-	1.02395	0.352436
P39023	RPL3	60S ribosomal protein L3 OS=Homo sapiens OX=9606 GN=RPL3 PE=1 SV=2	42	21	101	21	403	46.1	10.18	1061	94.2	102.6	106.8	96.6	99.8	100.1	101.2	98.8333	-	1.02395	0.57386
Q9UJA5	TRMT6	tRNA (adenine(58)-N(1))-methyltransferase non-catalytic subunit TRM6 OS=Homo sapiens OX=9606 GN=TRMT6 PE=1 SV=1	2	1	2	1	497	55.8	7.55	52	96.5	104.3	102.8	94.9	95.9	105.7	101.2	98.8333	-	1.02395	0.602606
Q9NX63	CHCHD3	MICOS complex subunit MIC19 OS=Homo sapiens OX=9606 GN=CHCHD3 PE=1 SV=1	57	18	48	18	227	26.1	8.28	658	100.2	102.9	100.5	100.6	98.5	97.4	101.2	98.8333	-	1.02395	0.135684
Q86SX6	GLRX5	Glutaredoxin-related protein 5, mitochondrial OS=Homo sapiens OX=9606 GN=GLRX5 PE=1 SV=2	28	3	8	3	157	16.6	6.79	286	99.8	95.7	108	99.6	97.6	99.3	101.167	98.8333	-	1.02361	0.559379
O00629	KPNA4	Importin subunit alpha-3 OS=Homo sapiens OX=9606 GN=KPNA4 PE=1 SV=1	17	7	14	3	521	57.9	4.96	202	95	103.8	104.7	94.5	100.9	101.1	101.167	98.8333	-	1.02361	0.570244
P11172	UMPS	Uridine 5'-monophosphate synthase OS=Homo sapiens OX=9606 GN=UMPS PE=1 SV=1	10	5	7	5	480	52.2	7.24	56	102.3	90.6	110.6	97	99.6	99.9	101.167	98.8333	-	1.02361	0.711475
O14734	ACOT8	Acyl-coenzyme A thioesterase 8 OS=Homo sapiens OX=9606 GN=ACOT8 PE=1 SV=1	23	6	11	6	319	35.9	7.56	67	102.1	100.1	101.3	99.7	97.9	98.9	101.167	98.8333	-	1.02361	0.0403281
Q86V48	LUZP1	Leucine zipper protein 1 OS=Homo sapiens OX=9606 GN=LUZP1 PE=1 SV=2	17	17	35	17	1076	120.2	8.5	306	97.8	103.3	102.4	97.7	100	98.8	101.167	98.8333	-	1.02361	0.270911
P32322	PYCR1	Pyrroline-5-carboxylate reductase 1, mitochondrial OS=Homo sapiens OX=9606 GN=PYCR1 PE=1 SV=2	35	8	32	7	319	33.3	7.61	748	100.5	98.7	104.3	98.3	98.2	100	101.167	98.8333	-	1.02361	0.253487
Q6IAN0	DHRS7B	Dehydrogenase/reductase SDR family member 7B OS=Homo sapiens OX=9606 GN=DHRS7B PE=1 SV=2	24	7	13	7	325	35.1	9.55	157	96.2	99.7	107.6	98.4	98.3	99.8	101.167	98.8333	-	1.02361	0.530963
P49411	TUFM	Elongation factor Tu, mitochondrial OS=Homo sapiens OX=9606 GN=TUFM PE=1 SV=2	56	24	129	24	452	49.5	7.61	1836	103.3	100.6	99.6	100.3	97.9	98.3	101.167	98.8333	-	1.02361	0.154521
P30048	PRDX3	Thioredoxin-dependent peroxide reductase, mitochondrial OS=Homo sapiens OX=9606 GN=PRDX3 PE=1 SV=3	36	7	35	7	256	27.7	7.78	425	106.3	104.7	92.5	106.6	91.4	98.5	101.167	98.8333	-	1.02361	0.725206
Q9Y2D4	EXOC6B	Exocyst complex component 6B OS=Homo sapiens OX=9606 GN=EXOC6B PE=1 SV=3	4	3	3	3	811	94.1	6.46	20	95.6	99	108.9	96.7	103	96.8	101.167	98.8333	-	1.02361	0.631505
P35269	GTF2F1	General transcription factor IIF subunit 1 OS=Homo sapiens OX=9606 GN=GTF2F1 PE=1 SV=2	17	7	9	7	517	58.2	7.49	139	101.5	98.4	103.6	98.1	99.2	99.2	101.167	98.8333	-	1.02361	0.20768
Q9H9B4	SFXN1	Sideroflexin-1 OS=Homo sapiens OX=9606 GN=SFXN1 PE=1 SV=4	41	12	99	11	322	35.6	9.07	1438	101.1	102	100.4	100	97.2	99.3	101.167	98.8333	-	1.02361	0.0720015
P49750	YLPM1	YLP motif-containing protein 1 OS=Homo sapiens OX=9606 GN=YLPM1 PE=1 SV=4	13	24	39	24	2146	241.5	6.55	420	100.1	101.8	101.6	100.1	98.1	98.3	101.167	98.8333	-	1.02361	0.0485887
Q92820	GGH	Gamma-glutamyl hydrolase OS=Homo sapiens OX=9606 GN=GGH PE=1 SV=2	18	6	8	6	318	35.9	7.11	42	108.2	93.9	101.3	106.2	95.8	94.5	101.133	98.8333	-	1.02327	0.699617
P28827	PTPRM	Receptor-type tyrosine-protein phosphatase mu OS=Homo sapiens OX=9606 GN=PTPRM PE=1 SV=2	1	1	1	1	1452	163.6	6.65	0	101.6	94.9	106.9	97.5	99.7	99.3	101.133	98.8333	-	1.02327	0.551006
Q6WKZ4	RAB11FIP1	Rab11 family-interacting protein 1 OS=Homo sapiens OX=9606 GN=RAB11FIP1 PE=1 SV=3	2	3	5	3	1283	137.1	5.43	53	101.1	101.8	100.5	100.5	97.5	98.5	101.133	98.8333	-	1.02327	0.0744076
P09382	LGALS1	Galectin-1 OS=Homo sapiens OX=9606 GN=LGALS1 PE=1 SV=2	72	9	145	9	135	14.7	5.5	3116	103.3	99.5	100.6	105.8	95.6	95.1	101.133	98.8333	-	1.02327	0.564291
P01024	C3	Complement C3 OS=Homo sapiens OX=9606 GN=C3 PE=1 SV=2	4	7	23	7	1663	187	6.4	443	113.5	88.1	101.8	94	101.1	101.4	101.133	98.8333	-	1.02327	0.780812
Q96DA6	DNAJC19	Mitochondrial import inner membrane translocase subunit TIM14 OS=Homo sapiens OX=9606 GN=DNAJC19 PE=1 SV=3	55	7	21	7	116	12.5	10.1	182	99.7	103.8	99.9	100.8	96.8	98.9	101.133	98.8333	-	1.02327	0.262506
Q99986	VRK1	Serine/threonine-protein kinase VRK1 OS=Homo sapiens OX=9606 GN=VRK1 PE=1 SV=1	24	8	13	8	396	45.4	8.91	221	97.2	107.1	99.1	96.4	99.1	101	101.133	98.8333	-	1.02327	0.525858
P40938	RFC3	Replication factor C subunit 3 OS=Homo sapiens OX=9606 GN=RFC3 PE=1 SV=2	21	7	14	7	356	40.5	8.34	150	100.3	101.1	102.1	99.3	99	98.3	101.167	98.8667	-	1.02326	0.0184712
Q9Y277	VDAC3	Voltage-dependent anion-selective channel protein 3 OS=Homo sapiens OX=9606 GN=VDAC3 PE=1 SV=1	41	10	53	9	283	30.6	8.66	1005	102.2	103.6	97.7	98.9	98.7	99	101.167	98.8667	-	1.02326	0.266364
P32780	GTF2H1	General transcription factor IIH subunit 1 OS=Homo sapiens OX=9606 GN=GTF2H1 PE=1 SV=1	4	2	2	2	548	62	8.66	64	99.5	102.8	101.2	99.3	102.2	95.1	101.167	98.8667	-	1.02326	0.368375
Q9H0X4	FAM234A	Protein FAM234A OS=Homo sapiens OX=9606 GN=FAM234A PE=1 SV=1	4	2	3	2	552	59.6	6.28	76	103.3	98.8	101.4	104.4	94.4	97.8	101.167	98.8667	-	1.02326	0.513569
Q9ULG6	CCPG1	Cell cycle progression protein 1 OS=Homo sapiens OX=9606 GN=CCPG1 PE=1 SV=3	4	4	5	4	757	87.3	5.95	0	98.8	104	100.6	97.1	99.3	100.2	101.133	98.8667	-	1.02293	0.272088
Q8NC44	RETREG2	Reticulophagy regulator 2 OS=Homo sapiens OX=9606 GN=RETREG2 PE=1 SV=3	5	2	2	2	543	57.8	4.45	38	91.6	88.9	122.9	93.7	102.8	100.1	101.133	98.8667	-	1.02293	0.850021
P07948	LYN	Tyrosine-protein kinase Lyn OS=Homo sapiens OX=9606 GN=LYN PE=1 SV=3	9	5	11	3	512	58.5	7.11	71	99.4	102.9	101.1	96.9	101.1	98.6	101.133	98.8667	-	1.02293	0.225669
Q9Y6J9	TAF6L	TAF6-like RNA polymerase II p300/CBP-associated factor-associated factor 65 kDa subunit 6L OS=Homo sapiens OX=9606 GN=TAF6L PE=1 SV=1	4	2	3	2	622	67.8	8.97	13	101	96.9	105.5	98.9	97.5	100.2	101.133	98.8667	-	1.02293	0.433009
P08047	SP1	Transcription factor Sp1 OS=Homo sapiens OX=9606 GN=SP1 PE=1 SV=3	5	2	2	2	785	80.6	7.34	53	105.3	98.3	99.8	98.6	96.2	101.8	101.133	98.8667	-	1.02293	0.444618
P51784	USP11	Ubiquitin carboxyl-terminal hydrolase 11 OS=Homo sapiens OX=9606 GN=USP11 PE=1 SV=3	3	3	4	3	963	109.7	5.45	25	98.6	101.4	103.4	91.4	99	106.2	101.133	98.8667	-	1.02293	0.640509
Q96RL7	VPS13A	Vacuolar protein sorting-associated protein 13A OS=Homo sapiens OX=9606 GN=VPS13A PE=1 SV=2	3	9	10	9	3174	360	6.33	129	100.7	97.5	105.2	97.9	96.7	102	101.133	98.8667	-	1.02293	0.456105
Q8TB96	ITFG1	T-cell immunomodulatory protein OS=Homo sapiens OX=9606 GN=ITFG1 PE=1 SV=1	9	5	5	5	612	68.1	5.39	46	105	98.4	100	94.9	99	102.7	101.133	98.8667	-	1.02293	0.492543
Q9P0K7	RAI14	Ankycorbin OS=Homo sapiens OX=9606 GN=RAI14 PE=1 SV=2	16	16	24	16	980	110	6.21	159	102.9	101.3	99.2	100.2	96.9	99.5	101.133	98.8667	-	1.02293	0.1975
Q02241	KIF23	Kinesin-like protein KIF23 OS=Homo sapiens OX=9606 GN=KIF23 PE=1 SV=3	32	26	54	26	960	110	8.51	970	97.6	109.2	96.6	100.5	97.6	98.5	101.133	98.8667	-	1.02293	0.612606
O00559	EBAG9	Receptor-binding cancer antigen expressed on SiSo cells OS=Homo sapiens OX=9606 GN=EBAG9 PE=1 SV=1	20	2	2	2	213	24.4	6.29	55	99.9	103.9	99.6	93.3	104.3	99	101.133	98.8667	-	1.02293	0.548753
Q96IZ7	RSRC1	Serine/Arginine-related protein 53 OS=Homo sapiens OX=9606 GN=RSRC1 PE=1 SV=1	20	6	7	6	334	38.7	11.08	84	99.8	99.1	104.5	100.5	99	97.1	101.133	98.8667	-	1.02293	0.311891
P53794	SLC5A3	Sodium/myo-inositol cotransporter OS=Homo sapiens OX=9606 GN=SLC5A3 PE=1 SV=2	5	3	6	3	718	79.6	7.27	56	103.7	105.3	94.4	93	101.4	102.2	101.133	98.8667	-	1.02293	0.640589
P25325	MPST	3-mercaptopyruvate sulfurtransferase OS=Homo sapiens OX=9606 GN=MPST PE=1 SV=3	15	4	10	4	297	33.2	6.6	48	104.5	98.3	100.6	98.9	97.1	100.6	101.133	98.8667	-	1.02293	0.335552
O14495	PLPP3	Phospholipid phosphatase 3 OS=Homo sapiens OX=9606 GN=PLPP3 PE=1 SV=1	12	4	5	4	311	35.1	9.14	26	90.9	108.8	103.7	97.5	101.2	97.9	101.133	98.8667	-	1.02293	0.698919
Q9UQE7	SMC3	Structural maintenance of chromosomes protein 3 OS=Homo sapiens OX=9606 GN=SMC3 PE=1 SV=2	36	45	105	45	1217	141.5	7.18	1360	100.5	102.4	100.5	98.4	99	99.2	101.133	98.8667	-	1.02293	0.0286736
Q9H5X1	CIAO2A	Cytosolic iron-sulfur assembly component 2A OS=Homo sapiens OX=9606 GN=CIAO2A PE=1 SV=1	13	2	2	2	160	18.3	4.88	59	102.4	98.9	102.1	105.5	95.5	95.6	101.133	98.8667	-	1.02293	0.552611
O43681	ASNA1	ATPase ASNA1 OS=Homo sapiens OX=9606 GN=ASNA1 PE=1 SV=2	12	5	14	5	348	38.8	4.91	102	101.8	98.5	103.1	100.3	97.4	98.9	101.133	98.8667	-	1.02293	0.230699
Q9P2W9	STX18	Syntaxin-18 OS=Homo sapiens OX=9606 GN=STX18 PE=1 SV=1	24	9	19	9	335	38.7	5.49	87	100.6	101.4	101.3	100.1	97.7	98.8	101.1	98.8667	-	1.02259	0.0389044
Q9Y241	HIGD1A	HIG1 domain family member 1A, mitochondrial OS=Homo sapiens OX=9606 GN=HIGD1A PE=1 SV=1	20	2	13	2	93	10.1	9.79	456	100.9	100.7	101.7	100.4	94.9	101.3	101.1	98.8667	-	1.02259	0.331648
P22694	PRKACB	cAMP-dependent protein kinase catalytic subunit beta OS=Homo sapiens OX=9606 GN=PRKACB PE=1 SV=2	20	7	11	7	351	40.6	8.78	127	103.2	100.8	99.3	102.5	97.9	96.2	101.1	98.8667	-	1.02259	0.367051
O15091	PRORP	Mitochondrial ribonuclease P catalytic subunit OS=Homo sapiens OX=9606 GN=PRORP PE=1 SV=2	14	8	13	8	583	67.3	8.78	61	100	103.4	99.9	98.3	98.6	99.7	101.1	98.8667	-	1.02259	0.142742
Q99747	NAPG	Gamma-soluble NSF attachment protein OS=Homo sapiens OX=9606 GN=NAPG PE=1 SV=1	31	10	18	10	312	34.7	5.41	207	99.3	102.7	101.4	99.6	98.8	98.3	101.133	98.9	-	1.02258	0.102939
O15226	NKRF	NF-kappa-B-repressing factor OS=Homo sapiens OX=9606 GN=NKRF PE=1 SV=2	31	21	31	21	690	77.6	8.79	173	100.5	102.4	100.5	98.9	99.9	97.9	101.133	98.9	-	1.02258	0.0596705
O15121	DEGS1	Sphingolipid delta(4)-desaturase DES1 OS=Homo sapiens OX=9606 GN=DEGS1 PE=1 SV=1	12	3	5	3	323	37.8	7.46	22	98.6	101.7	103.1	94.3	104.5	97.9	101.133	98.9	-	1.02258	0.532034
O00186	STXBP3	Syntaxin-binding protein 3 OS=Homo sapiens OX=9606 GN=STXBP3 PE=1 SV=2	19	12	24	12	592	67.7	7.8	186	102	101.6	99.8	99	98.8	98.9	101.133	98.9	-	1.02258	0.0302467
P63218	GNG5	Guanine nucleotide-binding protein G(I)/G(S)/G(O) subunit gamma-5 OS=Homo sapiens OX=9606 GN=GNG5 PE=1 SV=3	38	3	9	3	68	7.3	9.85	74	101.6	100.9	100.8	104.4	95.8	96.5	101.1	98.9	-	1.02224	0.471356
P61353	RPL27	60S ribosomal protein L27 OS=Homo sapiens OX=9606 GN=RPL27 PE=1 SV=2	49	7	29	7	136	15.8	10.56	87	96.6	102.7	104	97.2	99.8	99.7	101.1	98.9	-	1.02224	0.417265
Q9NQW6	ANLN	Anillin OS=Homo sapiens OX=9606 GN=ANLN PE=1 SV=2	29	31	57	31	1124	124.1	8.07	598	97.4	104.7	101.2	99.4	99.1	98.2	101.1	98.9	-	1.02224	0.361738
Q9H3R5	CENPH	Centromere protein H OS=Homo sapiens OX=9606 GN=CENPH PE=1 SV=1	15	3	4	3	247	28.5	5.29	52	101.6	104	97.7	98.2	100.7	97.8	101.1	98.9	-	1.02224	0.343157
P14866	HNRNPL	Heterogeneous nuclear ribonucleoprotein L OS=Homo sapiens OX=9606 GN=HNRNPL PE=1 SV=2	44	21	88	20	589	64.1	8.22	1416	100.9	102.9	99.5	98.3	99.1	99.3	101.1	98.9	-	1.02224	0.100192
Q8IYB5	SMAP1	Stromal membrane-associated protein 1 OS=Homo sapiens OX=9606 GN=SMAP1 PE=1 SV=2	3	1	1	1	467	50.4	8.75	0	110.9	93.4	99	92.8	101.2	102.7	101.1	98.9	-	1.02224	0.732838
Q9Y5B0	CTDP1	RNA polymerase II subunit A C-terminal domain phosphatase OS=Homo sapiens OX=9606 GN=CTDP1 PE=1 SV=3	7	5	5	5	961	104.3	5.27	42	100.3	103.1	99.9	95	97.6	104.1	101.1	98.9	-	1.02224	0.488541
Q99442	SEC62	Translocation protein SEC62 OS=Homo sapiens OX=9606 GN=SEC62 PE=1 SV=1	12	6	21	6	399	45.8	7.12	167	102.3	103.1	97.9	101.3	98.7	96.7	101.1	98.9	-	1.02224	0.352804
P62910	RPL32	60S ribosomal protein L32 OS=Homo sapiens OX=9606 GN=RPL32 PE=1 SV=2	44	7	29	7	135	15.9	11.33	249	97	103.2	103.1	96.1	100.9	99.7	101.1	98.9	-	1.02224	0.429681
Q9UL03	INTS6	Integrator complex subunit 6 OS=Homo sapiens OX=9606 GN=INTS6 PE=1 SV=1	8	7	7	7	887	100.3	8.62	39	100.6	101.9	100.8	99.7	97.4	99.6	101.1	98.9	-	1.02224	0.0612754
Q12788	TBL3	Transducin beta-like protein 3 OS=Homo sapiens OX=9606 GN=TBL3 PE=1 SV=2	27	17	34	17	808	89	6.9	552	102.9	100.7	99.7	100.2	97.1	99.4	101.1	98.9	-	1.02224	0.172275
Q16864	ATP6V1F	V-type proton ATPase subunit F OS=Homo sapiens OX=9606 GN=ATP6V1F PE=1 SV=2	25	3	6	3	119	13.4	5.52	35	97.8	99.1	106.4	93.1	103.9	99.7	101.1	98.9	-	1.02224	0.622333
Q9UKM7	MAN1B1	Endoplasmic reticulum mannosyl-oligosaccharide 1,2-alpha-mannosidase OS=Homo sapiens OX=9606 GN=MAN1B1 PE=1 SV=2	9	6	8	6	699	79.5	7.72	75	103.3	100.8	99.2	97.8	98.5	100.4	101.1	98.9	-	1.02224	0.19715
O15235	MRPS12	28S ribosomal protein S12, mitochondrial OS=Homo sapiens OX=9606 GN=MRPS12 PE=1 SV=1	30	3	7	3	138	15.2	10.29	103	101.8	101.1	100.4	99.2	98.3	99.2	101.1	98.9	-	1.02224	0.0119591
P35052	GPC1	Glypican-1 OS=Homo sapiens OX=9606 GN=GPC1 PE=1 SV=2	20	10	20	10	558	61.6	7.3	170	102.9	101.8	98.6	95.2	99.6	101.9	101.1	98.9	-	1.02224	0.402348
Q8NBU5	ATAD1	ATPase family AAA domain-containing protein 1 OS=Homo sapiens OX=9606 GN=ATAD1 PE=1 SV=1	38	11	28	11	361	40.7	6.9	473	102.7	101.6	98.9	98.2	100.2	98.3	101.067	98.9	-	1.02191	0.171678
Q8WWV3	RTN4IP1	Reticulon-4-interacting protein 1, mitochondrial OS=Homo sapiens OX=9606 GN=RTN4IP1 PE=1 SV=2	19	7	10	7	396	43.6	9.11	98	103.1	102.7	97.4	103.6	94	99.1	101.067	98.9	-	1.02191	0.550336
Q03113	GNA12	Guanine nucleotide-binding protein subunit alpha-12 OS=Homo sapiens OX=9606 GN=GNA12 PE=1 SV=4	13	5	30	4	381	44.3	9.83	556	99.8	100.5	102.9	102.6	97	97.1	101.067	98.9	-	1.02191	0.355292
P27695	APEX1	DNA-(apurinic or apyrimidinic site) lyase OS=Homo sapiens OX=9606 GN=APEX1 PE=1 SV=2	23	8	18	8	318	35.5	8.12	536	96.7	106.7	99.8	93.5	101.5	101.7	101.067	98.9	-	1.02191	0.617104
Q92692	NECTIN2	Nectin-2 OS=Homo sapiens OX=9606 GN=NECTIN2 PE=1 SV=1	13	7	12	7	538	57.7	4.82	187	100.5	101.2	101.5	99.4	98.8	98.5	101.067	98.9	-	1.02191	0.00548949
O75695	RP2	Protein XRP2 OS=Homo sapiens OX=9606 GN=RP2 PE=1 SV=4	24	10	12	10	350	39.6	5.12	62	100.8	98.4	104	98.9	98.4	99.4	101.067	98.9	-	1.02191	0.258806
O15145	ARPC3	Actin-related protein 2/3 complex subunit 3 OS=Homo sapiens OX=9606 GN=ARPC3 PE=1 SV=3	11	2	4	2	178	20.5	8.59	74	102.1	96.1	105	101.8	96	98.9	101.067	98.9	-	1.02191	0.524349
Q13123	IK	Protein Red OS=Homo sapiens OX=9606 GN=IK PE=1 SV=3	31	18	30	18	557	65.6	6.64	294	100.6	104.5	98.2	103.8	97.1	95.9	101.1	98.9333	-	1.0219	0.518985
Q5RI15	COX20	Cytochrome c oxidase assembly protein COX20, mitochondrial OS=Homo sapiens OX=9606 GN=COX20 PE=1 SV=2	24	4	10	4	118	13.3	8.76	115	98.7	101.8	102.8	97.8	100.1	98.9	101.1	98.9333	-	1.0219	0.197033
P53999	SUB1	Activated RNA polymerase II transcriptional coactivator p15 OS=Homo sapiens OX=9606 GN=SUB1 PE=1 SV=3	37	4	15	4	127	14.4	9.6	217	100.5	100.4	102.4	93.1	102	101.7	101.1	98.9333	-	1.0219	0.50874
Q7L2E3	DHX30	ATP-dependent RNA helicase DHX30 OS=Homo sapiens OX=9606 GN=DHX30 PE=1 SV=1	28	31	75	31	1194	133.9	8.78	822	100.1	102.8	100.4	97.6	99.3	99.9	101.1	98.9333	-	1.0219	0.119588
Q9UNY4	TTF2	Transcription termination factor 2 OS=Homo sapiens OX=9606 GN=TTF2 PE=1 SV=2	2	3	3	3	1162	129.5	8.37	32	98.6	100.6	104.1	100.7	93.5	102.6	101.1	98.9333	-	1.0219	0.535951
Q7Z333	SETX	Probable helicase senataxin OS=Homo sapiens OX=9606 GN=SETX PE=1 SV=4	1	3	3	3	2677	302.7	7.17	0	108	106.7	88.6	98.9	99.4	98.5	101.1	98.9333	-	1.0219	0.746953
Q92521	PIGB	GPI mannosyltransferase 3 OS=Homo sapiens OX=9606 GN=PIGB PE=1 SV=1	4	2	2	2	554	65	9.29	51	101.2	98.4	103.6	102.4	98.6	95.8	101.067	98.9333	-	1.02156	0.429941
P55060	CSE1L	Exportin-2 OS=Homo sapiens OX=9606 GN=CSE1L PE=1 SV=3	21	21	40	21	971	110.3	5.77	324	95.9	87	120.3	95.9	100.3	100.6	101.067	98.9333	-	1.02156	0.842568
Q9NUT2	ABCB8	Mitochondrial potassium channel ATP-binding subunit OS=Homo sapiens OX=9606 GN=ABCB8 PE=1 SV=3	8	6	12	5	735	79.9	8.98	94	99.6	102.5	101.1	99.8	99.6	97.4	101.067	98.9333	-	1.02156	0.133794
O00291	HIP1	Huntingtin-interacting protein 1 OS=Homo sapiens OX=9606 GN=HIP1 PE=1 SV=5	15	15	21	13	1037	116.1	5.3	203	102.8	101.1	99.3	99.4	98.5	98.9	101.067	98.9333	-	1.02156	0.11039
P56182	RRP1	Ribosomal RNA processing protein 1 homolog A OS=Homo sapiens OX=9606 GN=RRP1 PE=1 SV=1	34	16	37	16	461	52.8	9.33	514	99.8	102.4	101	97.8	98.7	100.3	101.067	98.9333	-	1.02156	0.111566
Q9H0R6	QRSL1	Glutamyl-tRNA(Gln) amidotransferase subunit A, mitochondrial OS=Homo sapiens OX=9606 GN=QRSL1 PE=1 SV=2	20	8	13	8	528	57.4	5.68	74	102	101.2	100	101.4	97.6	97.8	101.067	98.9333	-	1.02156	0.193021
O95232	LUC7L3	Luc7-like protein 3 OS=Homo sapiens OX=9606 GN=LUC7L3 PE=1 SV=2	19	9	22	9	432	51.4	9.79	278	96.3	103.9	103	100	99.9	96.9	101.067	98.9333	-	1.02156	0.45869
P09211	GSTP1	Glutathione S-transferase P OS=Homo sapiens OX=9606 GN=GSTP1 PE=1 SV=2	37	6	15	6	210	23.3	5.64	223	104.1	97.1	102.1	94.6	101.8	100.5	101.1	98.9667	-	1.02156	0.521505
Q9HBH0	RHOF	Rho-related GTP-binding protein RhoF OS=Homo sapiens OX=9606 GN=RHOF PE=1 SV=1	52	9	16	9	211	23.6	8.65	419	102	100.2	100.9	96.5	100.2	100.1	101.033	98.9333	-	1.02123	0.188159
O95297	MPZL1	Myelin protein zero-like protein 1 OS=Homo sapiens OX=9606 GN=MPZL1 PE=1 SV=1	16	4	7	4	269	29.1	8.72	63	98.4	100.7	104	97.9	100.7	98.2	101.033	98.9333	-	1.02123	0.320119
Q12905	ILF2	Interleukin enhancer-binding factor 2 OS=Homo sapiens OX=9606 GN=ILF2 PE=1 SV=2	25	9	43	9	390	43	5.26	678	100.7	101.9	100.5	98.6	100	98.2	101.033	98.9333	-	1.02123	0.039808
Q56VL3	OCIAD2	OCIA domain-containing protein 2 OS=Homo sapiens OX=9606 GN=OCIAD2 PE=1 SV=1	45	8	32	8	154	16.9	9.03	195	103.8	104	95.3	104.8	95.9	96.1	101.033	98.9333	-	1.02123	0.635682
Q9GZU3	TMEM39B	Transmembrane protein 39B OS=Homo sapiens OX=9606 GN=TMEM39B PE=1 SV=1	4	2	2	2	492	56.2	9.41	33	99.5	102.2	101.4	99.1	100.2	97.5	101.033	98.9333	-	1.02123	0.134188
P41743	PRKCI	Protein kinase C iota type OS=Homo sapiens OX=9606 GN=PRKCI PE=1 SV=2	13	5	7	5	596	68.2	5.85	111	101.3	101.6	100.2	96.5	100.8	99.5	101.033	98.9333	-	1.02123	0.192798
Q16629	SRSF7	Serine/arginine-rich splicing factor 7 OS=Homo sapiens OX=9606 GN=SRSF7 PE=1 SV=1	32	8	38	7	238	27.4	11.82	504	99.5	105.2	98.5	100.4	99.5	97	101.067	98.9667	-	1.02122	0.416822
Q08J23	NSUN2	RNA cytosine C(5)-methyltransferase NSUN2 OS=Homo sapiens OX=9606 GN=NSUN2 PE=1 SV=2	33	20	34	20	767	86.4	6.77	576	96.2	102.6	104.4	95.6	101.3	100	101.067	98.9667	-	1.02122	0.526077
Q658Y4	FAM91A1	Protein FAM91A1 OS=Homo sapiens OX=9606 GN=FAM91A1 PE=1 SV=3	5	4	7	4	838	93.9	6.39	63	101.5	99.6	102.1	98.3	98	100.6	101.067	98.9667	-	1.02122	0.132641
Q63ZY3	KANK2	KN motif and ankyrin repeat domain-containing protein 2 OS=Homo sapiens OX=9606 GN=KANK2 PE=1 SV=1	15	12	32	12	851	91.1	5.63	152	102.6	101.7	98.9	98.6	99.3	99	101.067	98.9667	-	1.02122	0.137265
Q9Y2T7	YBX2	Y-box-binding protein 2 OS=Homo sapiens OX=9606 GN=YBX2 PE=1 SV=2	19	5	19	2	364	38.5	10.8	439	98	100.4	104.8	83.5	100.3	113.1	101.067	98.9667	-	1.02122	0.823095
Q9HDC9	APMAP	Adipocyte plasma membrane-associated protein OS=Homo sapiens OX=9606 GN=APMAP PE=1 SV=2	37	16	67	16	416	46.5	6.16	751	102.2	101.5	99.5	100	98.2	98.7	101.067	98.9667	-	1.02122	0.0965176
P62820	RAB1A	Ras-related protein Rab-1A OS=Homo sapiens OX=9606 GN=RAB1A PE=1 SV=3	71	14	109	6	205	22.7	6.21	1840	100.6	103.5	99	99.7	98.8	98.4	101.033	98.9667	-	1.02088	0.206438
P18887	XRCC1	DNA repair protein XRCC1 OS=Homo sapiens OX=9606 GN=XRCC1 PE=1 SV=2	7	5	7	5	633	69.4	6.39	24	96.6	102.6	103.9	95.8	101	100.1	101.033	98.9667	-	1.02088	0.495911
P51648	ALDH3A2	Aldehyde dehydrogenase family 3 member A2 OS=Homo sapiens OX=9606 GN=ALDH3A2 PE=1 SV=1	30	13	40	13	485	54.8	7.88	407	100.9	105.5	96.7	97.6	98.8	100.5	101.033	98.9667	-	1.02088	0.483166
Q02878	RPL6	60S ribosomal protein L6 OS=Homo sapiens OX=9606 GN=RPL6 PE=1 SV=3	32	13	71	13	288	32.7	10.58	460	95.5	103.7	103.9	95.2	102.3	99.4	101.033	98.9667	-	1.02088	0.581472
Q9BYD6	MRPL1	39S ribosomal protein L1, mitochondrial OS=Homo sapiens OX=9606 GN=MRPL1 PE=1 SV=2	27	10	29	10	325	36.9	8.78	254	100.8	101.7	100.6	100.6	99.1	97.2	101.033	98.9667	-	1.02088	0.117907
Q12931	TRAP1	Heat shock protein 75 kDa, mitochondrial OS=Homo sapiens OX=9606 GN=TRAP1 PE=1 SV=3	37	27	116	26	704	80.1	8.21	1754	99.2	103	100.9	101.2	96.1	99.6	101.033	98.9667	-	1.02088	0.329784
Q2T9J0	TYSND1	Peroxisomal leader peptide-processing protease OS=Homo sapiens OX=9606 GN=TYSND1 PE=1 SV=3	4	2	2	2	566	59.3	6.2	71	104.8	94.8	103.5	103.5	94.9	98.5	101.033	98.9667	-	1.02088	0.633383
Q9NV06	DCAF13	DDB1- and CUL4-associated factor 13 OS=Homo sapiens OX=9606 GN=DCAF13 PE=1 SV=2	33	13	34	13	445	51.4	9.19	294	102.3	101.7	99.1	98.2	99.5	99.2	101.033	98.9667	-	1.02088	0.122424
Q14254	FLOT2	Flotillin-2 OS=Homo sapiens OX=9606 GN=FLOT2 PE=1 SV=2	45	18	46	18	428	47	5.25	538	101.7	100.9	100.5	100.8	98.3	97.8	101.033	98.9667	-	1.02088	0.105813
O15258	RER1	Protein RER1 OS=Homo sapiens OX=9606 GN=RER1 PE=1 SV=1	37	6	18	6	196	22.9	9.54	169	100.2	102.8	100.1	99.6	98.8	98.5	101.033	98.9667	-	1.02088	0.0934799
Q10567	AP1B1	AP-1 complex subunit beta-1 OS=Homo sapiens OX=9606 GN=AP1B1 PE=1 SV=2	19	20	47	4	949	104.6	5.06	552	97	104.2	101.9	98.1	96	102.8	101.033	98.9667	-	1.02088	0.518673
Q9NQ29	LUC7L	Putative RNA-binding protein Luc7-like 1 OS=Homo sapiens OX=9606 GN=LUC7L PE=1 SV=1	26	10	23	6	371	43.7	9.92	254	98.8	102.1	102.2	97.8	98.9	100.2	101.033	98.9667	-	1.02088	0.191105
O00148	DDX39A	ATP-dependent RNA helicase DDX39A OS=Homo sapiens OX=9606 GN=DDX39A PE=1 SV=2	35	15	50	7	427	49.1	5.68	621	95.5	103.8	103.8	96.9	101.7	98.3	101.033	98.9667	-	1.02088	0.542973
Q9BVK2	ALG8	Probable dolichyl pyrophosphate Glc1Man9GlcNAc2 alpha-1,3-glucosyltransferase OS=Homo sapiens OX=9606 GN=ALG8 PE=1 SV=2	2	1	5	1	526	60	9.14	24	102.7	101.2	99.2	97.7	99.4	99.8	101.033	98.9667	-	1.02088	0.160382
P41250	GARS1	Glycine--tRNA ligase OS=Homo sapiens OX=9606 GN=GARS1 PE=1 SV=3	21	16	36	16	739	83.1	7.03	481	104.8	96.6	101.7	98.8	98.4	99.7	101.033	98.9667	-	1.02088	0.441444
P19022	CDH2	Cadherin-2 OS=Homo sapiens OX=9606 GN=CDH2 PE=1 SV=4	13	9	16	9	906	99.7	4.81	193	106.5	100.8	95.9	102	96.2	98.8	101.067	99	-	1.02088	0.585801
Q7Z739	YTHDF3	YTH domain-containing family protein 3 OS=Homo sapiens OX=9606 GN=YTHDF3 PE=1 SV=1	14	7	12	4	585	63.8	9.04	145	99.9	104.1	99	96.2	98.6	102.1	101	98.9667	-	1.02055	0.431139
Q5UIP0	RIF1	Telomere-associated protein RIF1 OS=Homo sapiens OX=9606 GN=RIF1 PE=1 SV=2	12	24	29	24	2472	274.3	5.52	335	99.7	102.7	100.6	98.3	98.4	100.2	101	98.9667	-	1.02055	0.133447
Q9UI10	EIF2B4	Translation initiation factor eIF-2B subunit delta OS=Homo sapiens OX=9606 GN=EIF2B4 PE=1 SV=2	10	4	5	4	523	57.5	9.38	110	99.3	102.6	101.1	90.8	105.1	101	101	98.9667	-	1.02055	0.66502
Q86U42	PABPN1	Polyadenylate-binding protein 2 OS=Homo sapiens OX=9606 GN=PABPN1 PE=1 SV=3	28	9	25	9	306	32.7	5.06	310	101.9	99.7	101.4	100	101	95.9	101	98.9667	-	1.02055	0.296833
Q9UHJ3	SFMBT1	Scm-like with four MBT domains protein 1 OS=Homo sapiens OX=9606 GN=SFMBT1 PE=1 SV=2	1	1	1	1	866	98.1	6.21	0	101.9	102.7	98.5	100.9	98.5	97.6	101.033	99	-	1.02054	0.278017
Q9NXU5	ARL15	ADP-ribosylation factor-like protein 15 OS=Homo sapiens OX=9606 GN=ARL15 PE=1 SV=1	18	3	5	3	204	22.9	5.63	50	106	95.9	101.2	97.2	100	99.8	101.033	99	-	1.02054	0.541854
P37108	SRP14	Signal recognition particle 14 kDa protein OS=Homo sapiens OX=9606 GN=SRP14 PE=1 SV=2	23	4	9	4	136	14.6	10.04	39	98.5	101.8	102.8	101.5	98.9	96.6	101.033	99	-	1.02054	0.349574
O15554	KCNN4	Intermediate conductance calcium-activated potassium channel protein 4 OS=Homo sapiens OX=9606 GN=KCNN4 PE=1 SV=1	2	1	1	1	427	47.7	9.83	0	101.4	103.8	97.9	103.2	94	99.8	101.033	99	-	1.02054	0.557993
P84022	SMAD3	Mothers against decapentaplegic homolog 3 OS=Homo sapiens OX=9606 GN=SMAD3 PE=1 SV=1	18	7	10	3	425	48.1	7.15	140	102.9	98.8	101.4	97.4	101.5	98.1	101.033	99	-	1.02054	0.308172
P53597	SUCLG1	Succinate--CoA ligase [ADP/GDP-forming] subunit alpha, mitochondrial OS=Homo sapiens OX=9606 GN=SUCLG1 PE=1 SV=4	27	8	48	8	346	36.2	8.79	538	102.6	101.5	98.9	99.7	98.5	98.8	101	99	-	1.0202	0.158302
Q9NR30	DDX21	Nucleolar RNA helicase 2 OS=Homo sapiens OX=9606 GN=DDX21 PE=1 SV=5	32	26	97	25	783	87.3	9.28	1234	98.8	105.1	99.1	98	99.6	99.4	101	99	-	1.0202	0.39741
Q6ZWT7	MBOAT2	Lysophospholipid acyltransferase 2 OS=Homo sapiens OX=9606 GN=MBOAT2 PE=2 SV=2	2	1	1	1	520	59.5	8.03	20	105	104.4	93.6	100.2	94.9	101.9	101	99	-	1.0202	0.663306
P30405	PPIF	Peptidyl-prolyl cis-trans isomerase F, mitochondrial OS=Homo sapiens OX=9606 GN=PPIF PE=1 SV=1	27	7	16	5	207	22	9.38	158	102.2	101.6	99.2	101.8	96.9	98.3	101	99	-	1.0202	0.309908
Q9BZF3	OSBPL6	Oxysterol-binding protein-related protein 6 OS=Homo sapiens OX=9606 GN=OSBPL6 PE=1 SV=1	3	2	2	1	934	106.2	6.93	66	105.1	98.6	99.3	99.3	98.3	99.4	101	99	-	1.0202	0.392719
Q8N9Q2	SREK1IP1	Protein SREK1IP1 OS=Homo sapiens OX=9606 GN=SREK1IP1 PE=1 SV=1	9	2	3	2	155	18.2	9.85	0	98.5	104.5	100	99.6	99.4	98	101	99	-	1.0202	0.345475
P11142	HSPA8	Heat shock cognate 71 kDa protein OS=Homo sapiens OX=9606 GN=HSPA8 PE=1 SV=1	63	38	277	31	646	70.9	5.52	3823	100.3	100	102.7	98.8	99.2	99	101	99	-	1.0202	0.0811604
O75306	NDUFS2	NADH dehydrogenase [ubiquinone] iron-sulfur protein 2, mitochondrial OS=Homo sapiens OX=9606 GN=NDUFS2 PE=1 SV=2	25	11	27	11	463	52.5	7.55	303	101.3	104	97.7	97.1	100	99.9	101	99	-	1.0202	0.386069
Q9Y2Q3	GSTK1	Glutathione S-transferase kappa 1 OS=Homo sapiens OX=9606 GN=GSTK1 PE=1 SV=3	42	8	23	8	226	25.5	8.41	357	104.2	101.2	97.6	103.2	97.5	96.3	101	99	-	1.0202	0.522662
P42356	PI4KA	Phosphatidylinositol 4-kinase alpha OS=Homo sapiens OX=9606 GN=PI4KA PE=1 SV=4	3	5	5	5	2102	236.7	7.06	51	104.1	93	105.9	101	90.2	105.8	101	99	-	1.0202	0.760499
O43776	NARS1	Asparagine--tRNA ligase, cytoplasmic OS=Homo sapiens OX=9606 GN=NARS1 PE=1 SV=1	25	13	40	13	548	62.9	6.25	535	95.9	101.1	106	93.8	101.4	101.8	101	99	-	1.0202	0.635815
Q6R327	RICTOR	Rapamycin-insensitive companion of mTOR OS=Homo sapiens OX=9606 GN=RICTOR PE=1 SV=1	2	3	3	3	1708	192.1	7.47	27	100.6	102	100.4	97.2	99.8	100	101	99	-	1.0202	0.12488
Q16795	NDUFA9	NADH dehydrogenase [ubiquinone] 1 alpha subcomplex subunit 9, mitochondrial OS=Homo sapiens OX=9606 GN=NDUFA9 PE=1 SV=2	23	8	29	8	377	42.5	9.8	298	101.9	102.8	98.3	98.2	99.8	99	101	99	-	1.0202	0.239974
Q9NRX1	PNO1	RNA-binding protein PNO1 OS=Homo sapiens OX=9606 GN=PNO1 PE=1 SV=1	30	8	12	8	252	27.9	9.73	264	98.4	102.4	102.2	98.2	100.6	98.2	101	99	-	1.0202	0.260574
Q96SZ6	CDK5RAP1	CDK5 regulatory subunit-associated protein 1 OS=Homo sapiens OX=9606 GN=CDK5RAP1 PE=1 SV=2	13	6	7	6	601	67.6	8.21	91	96.7	100	106.3	95.3	100.5	101.2	101	99	-	1.0202	0.585374
Q02818	NUCB1	Nucleobindin-1 OS=Homo sapiens OX=9606 GN=NUCB1 PE=1 SV=4	51	20	53	20	461	53.8	5.25	686	104.1	101.1	97.8	101.1	97.7	98.2	101	99	-	1.0202	0.395965
Q8NBZ0	INO80E	INO80 complex subunit E OS=Homo sapiens OX=9606 GN=INO80E PE=1 SV=1	3	1	2	1	244	26.5	8.34	0	97.9	104.5	100.5	94.3	100.8	101.9	100.967	99	-	1.01987	0.554277
Q9H9S5	FKRP	Fukutin-related protein OS=Homo sapiens OX=9606 GN=FKRP PE=1 SV=1	8	4	5	4	495	54.5	7.4	53	98	103.8	101.1	99.7	98.3	99	100.967	99	-	1.01987	0.317557
Q14151	SAFB2	Scaffold attachment factor B2 OS=Homo sapiens OX=9606 GN=SAFB2 PE=1 SV=1	30	28	64	19	953	107.4	6.16	816	100.1	105.1	97.7	100.4	98.2	98.4	100.967	99	-	1.01987	0.43888
P62805	H4C1	Histone H4 OS=Homo sapiens OX=9606 GN=H4C1 PE=1 SV=2	52	8	126	8	103	11.4	11.36	1612	100.4	102.5	100	98.5	99.8	98.7	100.967	99	-	1.01987	0.0877079
Q15029	EFTUD2	116 kDa U5 small nuclear ribonucleoprotein component OS=Homo sapiens OX=9606 GN=EFTUD2 PE=1 SV=1	40	34	102	33	972	109.4	5	1591	100.7	102.8	99.4	100.9	97.7	98.4	100.967	99	-	1.01987	0.229258
Q9HCD5	NCOA5	Nuclear receptor coactivator 5 OS=Homo sapiens OX=9606 GN=NCOA5 PE=1 SV=2	13	8	15	8	579	65.5	9.6	96	104.2	102.1	96.6	99.5	98.9	98.6	100.967	99	-	1.01987	0.437264
P42126	ECI1	Enoyl-CoA delta isomerase 1, mitochondrial OS=Homo sapiens OX=9606 GN=ECI1 PE=1 SV=1	20	6	29	6	302	32.8	8.54	672	103.8	100.7	98.5	100.4	96.9	99.8	101	99.0333	-	1.01986	0.354363
Q9UHA3	RSL24D1	Probable ribosome biogenesis protein RLP24 OS=Homo sapiens OX=9606 GN=RSL24D1 PE=1 SV=1	21	3	13	3	163	19.6	9.98	283	101.7	101.1	100.2	100.7	97.3	99.1	101	99.0333	-	1.01986	0.141163
P03928	MT-ATP8	ATP synthase protein 8 OS=Homo sapiens OX=9606 GN=MT-ATP8 PE=1 SV=1	16	1	6	1	68	8	9.91	33	102.3	104.7	96	104.4	95.1	97.6	101	99.0333	-	1.01986	0.632208
Q9BWS9	CHID1	Chitinase domain-containing protein 1 OS=Homo sapiens OX=9606 GN=CHID1 PE=1 SV=1	22	8	19	8	393	44.9	8.63	389	108.5	97.3	97.2	105.1	96.5	95.5	101	99.0333	-	1.01986	0.704837
Q15643	TRIP11	Thyroid receptor-interacting protein 11 OS=Homo sapiens OX=9606 GN=TRIP11 PE=1 SV=3	10	19	30	19	1979	227.4	5.26	267	101.3	103.4	98.3	96.8	99.4	100.9	101	99.0333	-	1.01986	0.359956
P35606	COPB2	Coatomer subunit beta' OS=Homo sapiens OX=9606 GN=COPB2 PE=1 SV=2	26	22	44	22	906	102.4	5.27	414	98.6	101.4	103	96.8	100.5	99.8	101	99.0333	-	1.01986	0.315411
Q92979	EMG1	Ribosomal RNA small subunit methyltransferase NEP1 OS=Homo sapiens OX=9606 GN=EMG1 PE=1 SV=4	22	5	13	5	244	26.7	9.17	133	95.9	106.2	100.8	98.7	99	99.4	100.967	99.0333	-	1.01952	0.552034
P00533	EGFR	Epidermal growth factor receptor OS=Homo sapiens OX=9606 GN=EGFR PE=1 SV=2	37	37	129	37	1210	134.2	6.68	2092	100.2	103.4	99.3	98.8	98.3	100	100.967	99.0333	-	1.01952	0.223252
Q99459	CDC5L	Cell division cycle 5-like protein OS=Homo sapiens OX=9606 GN=CDC5L PE=1 SV=2	34	20	44	20	802	92.2	8.18	785	100.6	102.7	99.6	100.4	98	98.7	100.967	99.0333	-	1.01952	0.170489
P33992	MCM5	DNA replication licensing factor MCM5 OS=Homo sapiens OX=9606 GN=MCM5 PE=1 SV=5	23	13	28	13	734	82.2	8.37	406	97.3	99.5	106.1	96.4	100.5	100.2	100.967	99.0333	-	1.01952	0.548659
Q9UM00	TMCO1	Calcium load-activated calcium channel OS=Homo sapiens OX=9606 GN=TMCO1 PE=1 SV=2	10	2	8	2	239	27.1	10.26	109	100.2	103	99.7	100.4	97.5	99.2	100.967	99.0333	-	1.01952	0.219003
Q9H6H4	REEP4	Receptor expression-enhancing protein 4 OS=Homo sapiens OX=9606 GN=REEP4 PE=1 SV=1	8	2	3	2	257	29.4	9.73	43	93.6	89	120.3	96.8	98.5	101.8	100.967	99.0333	-	1.01952	0.854213
O00151	PDLIM1	PDZ and LIM domain protein 1 OS=Homo sapiens OX=9606 GN=PDLIM1 PE=1 SV=4	39	11	24	11	329	36	7.02	305	96.1	99.2	107.6	97.2	100.7	99.2	100.967	99.0333	-	1.01952	0.617999
O00488	ZNF593	Zinc finger protein 593 OS=Homo sapiens OX=9606 GN=ZNF593 PE=1 SV=2	39	4	7	4	134	15.2	9.82	37	95.2	104.2	103.5	102.9	95.2	99	100.967	99.0333	-	1.01952	0.62403
O15400	STX7	Syntaxin-7 OS=Homo sapiens OX=9606 GN=STX7 PE=1 SV=4	38	7	17	7	261	29.8	5.55	403	99.9	101.5	101.5	101.2	96.8	99.1	100.967	99.0333	-	1.01952	0.233272
Q4G0N4	NADK2	NAD kinase 2, mitochondrial OS=Homo sapiens OX=9606 GN=NADK2 PE=1 SV=2	29	11	21	11	442	49.4	8.18	184	103.4	99.1	100.3	100.8	98.1	98.2	100.933	99.0333	-	1.01919	0.2892
Q8N766	EMC1	ER membrane protein complex subunit 1 OS=Homo sapiens OX=9606 GN=EMC1 PE=1 SV=1	13	14	38	14	993	111.7	7.66	452	100.3	103.2	99.3	98.6	99.2	99.3	100.933	99.0333	-	1.01919	0.185515
Q9UJY1	HSPB8	Heat shock protein beta-8 OS=Homo sapiens OX=9606 GN=HSPB8 PE=1 SV=1	14	3	3	3	196	21.6	5.12	42	101.6	97	104.2	87.1	95.2	114.8	100.933	99.0333	-	1.01919	0.833845
P48637	GSS	Glutathione synthetase OS=Homo sapiens OX=9606 GN=GSS PE=1 SV=1	18	9	10	9	474	52.4	5.92	69	101.1	97.5	104.2	96.6	101.5	99	100.933	99.0333	-	1.01919	0.472457
Q9BQ61	TRIR	Telomerase RNA component interacting RNase OS=Homo sapiens OX=9606 GN=TRIR PE=1 SV=1	14	3	3	3	176	18.4	9.44	82	98.7	98.8	105.4	95	99.9	102.3	100.967	99.0667	-	1.01918	0.571516
Q8NCW5	NAXE	NAD(P)H-hydrate epimerase OS=Homo sapiens OX=9606 GN=NAXE PE=1 SV=2	12	3	5	3	288	31.7	7.66	42	107.3	99.7	95.9	101.6	97.3	98.3	100.967	99.0667	-	1.01918	0.625043
O15213	WDR46	WD repeat-containing protein 46 OS=Homo sapiens OX=9606 GN=WDR46 PE=1 SV=3	25	13	28	13	610	68	9.67	441	99.5	103.2	100.2	97.6	99.5	100.1	100.967	99.0667	-	1.01918	0.23554
Q9NPA0	EMC7	ER membrane protein complex subunit 7 OS=Homo sapiens OX=9606 GN=EMC7 PE=1 SV=1	24	5	17	5	242	26.5	9.25	94	101.6	101.1	100.2	99.9	98.2	99.1	100.967	99.0667	-	1.01918	0.0410901
P11177	PDHB	Pyruvate dehydrogenase E1 component subunit beta, mitochondrial OS=Homo sapiens OX=9606 GN=PDHB PE=1 SV=3	35	11	62	11	359	39.2	6.65	1265	102.2	102.8	97.9	99.7	98	99.5	100.967	99.0667	-	1.01918	0.309473
O43676	NDUFB3	NADH dehydrogenase [ubiquinone] 1 beta subcomplex subunit 3 OS=Homo sapiens OX=9606 GN=NDUFB3 PE=1 SV=3	38	4	8	4	98	11.4	9.2	91	101.7	105	96.2	98.2	99.9	99.1	100.967	99.0667	-	1.01918	0.507451
Q8IZP0	ABI1	Abl interactor 1 OS=Homo sapiens OX=9606 GN=ABI1 PE=1 SV=4	8	4	7	2	508	55	7.06	72	98.3	101.2	103.3	97.8	100.4	99	100.933	99.0667	-	1.01884	0.316679
Q92499	DDX1	ATP-dependent RNA helicase DDX1 OS=Homo sapiens OX=9606 GN=DDX1 PE=1 SV=2	34	23	57	23	740	82.4	7.23	589	98	102	102.8	96.9	100.5	99.8	100.933	99.0667	-	1.01884	0.369824
P61966	AP1S1	AP-1 complex subunit sigma-1A OS=Homo sapiens OX=9606 GN=AP1S1 PE=1 SV=1	15	2	5	1	158	18.7	5.73	110	101.7	98.2	102.9	102.9	96.1	98.2	100.933	99.0667	-	1.01884	0.489458
O15228	GNPAT	Dihydroxyacetone phosphate acyltransferase OS=Homo sapiens OX=9606 GN=GNPAT PE=1 SV=1	21	14	21	14	680	77.1	6.57	180	99.3	98	105.5	99	98.5	99.7	100.933	99.0667	-	1.01884	0.469706
Q9UBB9	TFIP11	Tuftelin-interacting protein 11 OS=Homo sapiens OX=9606 GN=TFIP11 PE=1 SV=1	24	18	24	18	837	96.8	5.67	175	100	102	100.8	99	99.4	98.8	100.933	99.0667	-	1.01884	0.0371697
Q96S66	CLCC1	Chloride channel CLIC-like protein 1 OS=Homo sapiens OX=9606 GN=CLCC1 PE=1 SV=1	22	13	26	13	551	62	5.55	242	100.8	101.2	100.8	98.9	99.9	98.4	100.933	99.0667	-	1.01884	0.01545
Q12906	ILF3	Interleukin enhancer-binding factor 3 OS=Homo sapiens OX=9606 GN=ILF3 PE=1 SV=3	33	26	98	22	894	95.3	8.76	1286	99.5	102.9	100.4	98	99.3	99.9	100.933	99.0667	-	1.01884	0.183281
Q15836	VAMP3	Vesicle-associated membrane protein 3 OS=Homo sapiens OX=9606 GN=VAMP3 PE=1 SV=3	40	4	32	1	100	11.3	8.79	994	101.2	101.6	100	102.5	96.3	98.4	100.933	99.0667	-	1.01884	0.377633
Q96RL1	UIMC1	BRCA1-A complex subunit RAP80 OS=Homo sapiens OX=9606 GN=UIMC1 PE=1 SV=2	2	1	1	1	719	79.7	5.45	20	93.1	109.8	99.9	100.6	98.9	97.7	100.933	99.0667	-	1.01884	0.723719
Q13637	RAB32	Ras-related protein Rab-32 OS=Homo sapiens OX=9606 GN=RAB32 PE=1 SV=3	34	6	15	5	225	25	6.54	329	98.4	101.8	102.6	99.5	98.4	99.3	100.933	99.0667	-	1.01884	0.233495
Q8IVF2	AHNAK2	Protein AHNAK2 OS=Homo sapiens OX=9606 GN=AHNAK2 PE=1 SV=2	40	106	286	105	5795	616.2	5.36	3719	99.7	101.1	102	104.4	96.4	96.4	100.933	99.0667	-	1.01884	0.534423
Q96N11	C7orf26	Uncharacterized protein C7orf26 OS=Homo sapiens OX=9606 GN=C7orf26 PE=2 SV=1	6	2	2	2	449	50	7.69	37	107.3	93.1	102.4	96.6	106.9	93.7	100.933	99.0667	-	1.01884	0.762819
P48047	ATP5PO	ATP synthase subunit O, mitochondrial OS=Homo sapiens OX=9606 GN=ATP5PO PE=1 SV=1	53	10	47	10	213	23.3	9.96	763	101	103.4	98.4	99	98.3	99.9	100.933	99.0667	-	1.01884	0.285708
P53814	SMTN	Smoothelin OS=Homo sapiens OX=9606 GN=SMTN PE=1 SV=7	6	5	7	5	917	99	9.07	63	100.3	101.9	100.6	105.3	97.6	94.3	100.933	99.0667	-	1.01884	0.601403
Q9NPJ3	ACOT13	Acyl-coenzyme A thioesterase 13 OS=Homo sapiens OX=9606 GN=ACOT13 PE=1 SV=1	22	4	15	4	140	15	9.14	341	104.9	99.4	98.5	99.1	98.2	99.9	100.933	99.0667	-	1.01884	0.416036
Q96Q11	TRNT1	CCA tRNA nucleotidyltransferase 1, mitochondrial OS=Homo sapiens OX=9606 GN=TRNT1 PE=1 SV=2	18	7	9	7	434	50.1	8.1	95	95.5	94.9	112.3	98.1	96.8	102.3	100.9	99.0667	-	1.01851	0.772972
P08243	ASNS	Asparagine synthetase [glutamine-hydrolyzing] OS=Homo sapiens OX=9606 GN=ASNS PE=1 SV=4	19	10	13	10	561	64.3	6.86	123	106.7	91.7	104.3	96.3	98.9	102	100.9	99.0667	-	1.01851	0.72911
P25705	ATP5F1A	ATP synthase subunit alpha, mitochondrial OS=Homo sapiens OX=9606 GN=ATP5F1A PE=1 SV=1	44	26	212	26	553	59.7	9.13	2770	101.6	101.3	99.9	101	99.1	97.2	100.933	99.1	-	1.0185	0.206013
P31937	HIBADH	3-hydroxyisobutyrate dehydrogenase, mitochondrial OS=Homo sapiens OX=9606 GN=HIBADH PE=1 SV=2	20	5	22	5	336	35.3	8.13	587	102.2	102	98.6	102.2	97.7	97.4	100.933	99.1	-	1.0185	0.398776
Q9HCU5	PREB	Prolactin regulatory element-binding protein OS=Homo sapiens OX=9606 GN=PREB PE=1 SV=2	26	8	17	8	417	45.4	7.88	163	99.5	102.7	100.6	95.6	101	100.7	100.933	99.1	-	1.0185	0.408558
Q9H5V8	CDCP1	CUB domain-containing protein 1 OS=Homo sapiens OX=9606 GN=CDCP1 PE=1 SV=3	20	15	48	15	836	92.9	7.96	611	100.7	100.5	101.6	101.1	97.9	98.3	100.933	99.1	-	1.0185	0.159361
Q9NXG6	P4HTM	Transmembrane prolyl 4-hydroxylase OS=Homo sapiens OX=9606 GN=P4HTM PE=1 SV=2	16	6	7	6	502	56.6	6.06	95	103.4	101.2	98.1	107.2	91.1	99	100.9	99.1	-	1.01816	0.731741
P62314	SNRPD1	Small nuclear ribonucleoprotein Sm D1 OS=Homo sapiens OX=9606 GN=SNRPD1 PE=1 SV=1	11	2	8	2	119	13.3	11.56	103	101.8	99.3	101.6	98	99.7	99.6	100.9	99.1	-	1.01816	0.137988
Q9Y6M9	NDUFB9	NADH dehydrogenase [ubiquinone] 1 beta subcomplex subunit 9 OS=Homo sapiens OX=9606 GN=NDUFB9 PE=1 SV=3	56	8	19	8	179	21.8	8.38	350	100.4	102.5	99.8	99.7	98.5	99.1	100.9	99.1	-	1.01816	0.112833
P51452	DUSP3	Dual specificity protein phosphatase 3 OS=Homo sapiens OX=9606 GN=DUSP3 PE=1 SV=1	10	1	1	1	185	20.5	7.8	34	105.2	96.5	101	101.9	88.3	107.1	100.9	99.1	-	1.01816	0.784046
Q92643	PIGK	GPI-anchor transamidase OS=Homo sapiens OX=9606 GN=PIGK PE=1 SV=2	5	2	4	2	395	45.2	6.16	49	100.1	102.3	100.3	100.1	97.1	100.1	100.9	99.1	-	1.01816	0.214751
P47914	RPL29	60S ribosomal protein L29 OS=Homo sapiens OX=9606 GN=RPL29 PE=1 SV=2	19	4	18	4	159	17.7	11.66	225	93.7	103.4	105.6	96.3	102.5	98.5	100.9	99.1	-	1.01816	0.681974
P33176	KIF5B	Kinesin-1 heavy chain OS=Homo sapiens OX=9606 GN=KIF5B PE=1 SV=1	17	14	17	14	963	109.6	6.51	200	100.8	88.6	113.3	98.2	97.8	101.3	100.9	99.1	-	1.01816	0.815295
O43402	EMC8	ER membrane protein complex subunit 8 OS=Homo sapiens OX=9606 GN=EMC8 PE=1 SV=1	29	6	12	6	210	23.8	6.4	156	99.8	105.8	97.1	100.8	98	98.5	100.9	99.1	-	1.01816	0.54313
P22695	UQCRC2	Cytochrome b-c1 complex subunit 2, mitochondrial OS=Homo sapiens OX=9606 GN=UQCRC2 PE=1 SV=3	40	16	66	16	453	48.4	8.63	820	101.6	102.4	98.7	98.7	98.3	100.3	100.9	99.1	-	1.01816	0.232173
Q96E29	MTERF3	Transcription termination factor 3, mitochondrial OS=Homo sapiens OX=9606 GN=MTERF3 PE=1 SV=2	18	7	8	7	417	47.9	8.53	31	96.3	102.8	103.6	100.2	98.2	98.9	100.9	99.1	-	1.01816	0.492363
Q9UMY1	NOL7	Nucleolar protein 7 OS=Homo sapiens OX=9606 GN=NOL7 PE=1 SV=2	17	7	22	7	257	29.4	9.67	146	92.2	103	107.5	91.6	99.4	106.3	100.9	99.1	-	1.01816	0.786535
Q9UBU8	MORF4L1	Mortality factor 4-like protein 1 OS=Homo sapiens OX=9606 GN=MORF4L1 PE=1 SV=2	14	5	11	4	362	41.4	9.28	195	94.8	108.9	99	100.7	95.2	101.4	100.9	99.1	-	1.01816	0.716485
Q6ZRP7	QSOX2	Sulfhydryl oxidase 2 OS=Homo sapiens OX=9606 GN=QSOX2 PE=1 SV=3	18	12	22	12	698	77.5	7.72	154	96.5	104	102.2	98.6	98.2	100.5	100.9	99.1	-	1.01816	0.489726
Q8N3V7	SYNPO	Synaptopodin OS=Homo sapiens OX=9606 GN=SYNPO PE=1 SV=2	16	11	17	11	929	99.4	8.72	219	97.9	103.8	101	102.8	97.2	97.3	100.9	99.1	-	1.01816	0.513776
Q9GZY8	MFF	Mitochondrial fission factor OS=Homo sapiens OX=9606 GN=MFF PE=1 SV=1	12	3	4	3	342	38.4	8.95	30	87.4	105.1	110.1	88.7	105.2	103.4	100.867	99.1	-	1.01783	0.848046
Q9H6R4	NOL6	Nucleolar protein 6 OS=Homo sapiens OX=9606 GN=NOL6 PE=1 SV=2	18	18	29	18	1146	127.5	7.64	352	100.4	102.4	99.9	99.8	98.4	99.2	100.9	99.1333	-	1.01782	0.110566
Q6PJG2	ELMSAN1	ELM2 and SANT domain-containing protein 1 OS=Homo sapiens OX=9606 GN=ELMSAN1 PE=1 SV=2	3	3	4	3	1045	114.9	9.19	38	104.9	99.1	98.7	100.8	96.8	99.8	100.9	99.1333	-	1.01782	0.491612
Q6P2C8	MED27	Mediator of RNA polymerase II transcription subunit 27 OS=Homo sapiens OX=9606 GN=MED27 PE=1 SV=1	3	1	1	1	311	35.4	9.31	0	98.9	101.8	102	101.6	97	98.8	100.9	99.1333	-	1.01782	0.350188
O60830	TIMM17B	Mitochondrial import inner membrane translocase subunit Tim17-B OS=Homo sapiens OX=9606 GN=TIMM17B PE=1 SV=1	26	3	4	3	172	18.3	9.03	78	98.3	104.2	100.2	98.9	99.4	99.1	100.9	99.1333	-	1.01782	0.368562
P28799	GRN	Progranulin OS=Homo sapiens OX=9606 GN=GRN PE=1 SV=2	11	6	8	6	593	63.5	6.83	71	106	98.1	98.6	106	96.3	95.1	100.9	99.1333	-	1.01782	0.701794
Q96AQ8	MCUR1	Mitochondrial calcium uniporter regulator 1 OS=Homo sapiens OX=9606 GN=MCUR1 PE=1 SV=1	13	7	11	7	359	39.7	9.63	53	99.4	102.5	100.8	101.8	97.1	98.5	100.9	99.1333	-	1.01782	0.346324
P57740	NUP107	Nuclear pore complex protein Nup107 OS=Homo sapiens OX=9606 GN=NUP107 PE=1 SV=1	20	15	37	15	925	106.3	5.43	462	98.8	100.1	103.8	98.8	98.5	100.1	100.9	99.1333	-	1.01782	0.325103
P46977	STT3A	Dolichyl-diphosphooligosaccharide--protein glycosyltransferase subunit STT3A OS=Homo sapiens OX=9606 GN=STT3A PE=1 SV=2	20	17	70	15	705	80.5	8.07	771	102.3	102.3	98	100	98.9	98.5	100.867	99.1333	-	1.01748	0.312708
Q6JQN1	ACAD10	Acyl-CoA dehydrogenase family member 10 OS=Homo sapiens OX=9606 GN=ACAD10 PE=1 SV=1	4	4	4	4	1059	118.8	8.06	24	105	96.4	101.2	100	98	99.4	100.867	99.1333	-	1.01748	0.535153
P52429	DGKE	Diacylglycerol kinase epsilon OS=Homo sapiens OX=9606 GN=DGKE PE=1 SV=1	3	2	2	2	567	63.9	7.74	20	98	105.7	98.9	95	104.6	97.8	100.867	99.1333	-	1.01748	0.667617
O95816	BAG2	BAG family molecular chaperone regulator 2 OS=Homo sapiens OX=9606 GN=BAG2 PE=1 SV=1	47	11	35	11	211	23.8	6.7	544	99.9	101.1	101.6	102.6	96.6	98.2	100.867	99.1333	-	1.01748	0.404921
Q86XL3	ANKLE2	Ankyrin repeat and LEM domain-containing protein 2 OS=Homo sapiens OX=9606 GN=ANKLE2 PE=1 SV=4	24	22	28	22	938	104.1	7.09	236	100.2	103.3	99.1	98.3	98.2	100.9	100.867	99.1333	-	1.01748	0.322482
Q96I59	NARS2	Probable asparagine--tRNA ligase, mitochondrial OS=Homo sapiens OX=9606 GN=NARS2 PE=1 SV=3	9	5	11	5	477	54.1	7.24	193	105.2	99.1	98.3	99.9	100.1	97.4	100.867	99.1333	-	1.01748	0.500953
Q14571	ITPR2	Inositol 1,4,5-trisphosphate receptor type 2 OS=Homo sapiens OX=9606 GN=ITPR2 PE=1 SV=2	13	36	64	23	2701	307.9	6.43	572	102.1	100.7	99.8	99.2	99.2	99	100.867	99.1333	-	1.01748	0.0614866
O94925	GLS	Glutaminase kidney isoform, mitochondrial OS=Homo sapiens OX=9606 GN=GLS PE=1 SV=1	19	10	33	10	669	73.4	7.77	613	98.9	99.9	103.8	99.8	98.4	99.2	100.867	99.1333	-	1.01748	0.325751
Q9HC36	MRM3	rRNA methyltransferase 3, mitochondrial OS=Homo sapiens OX=9606 GN=MRM3 PE=1 SV=2	14	7	12	7	420	47	8.73	69	98.7	105.1	98.8	100.3	99	98.1	100.867	99.1333	-	1.01748	0.476901
P04439	HLA-A	HLA class I histocompatibility antigen, A alpha chain OS=Homo sapiens OX=9606 GN=HLA-A PE=1 SV=2	24	6	24	2	365	40.8	6	443	101.4	100.1	101.1	100.8	99.4	97.2	100.867	99.1333	-	1.01748	0.196314
P29590	PML	Protein PML OS=Homo sapiens OX=9606 GN=PML PE=1 SV=3	12	9	16	9	882	97.5	6.21	153	101.8	99.2	101.6	102	98.4	97	100.867	99.1333	-	1.01748	0.367455
Q9BQG0	MYBBP1A	Myb-binding protein 1A OS=Homo sapiens OX=9606 GN=MYBBP1A PE=1 SV=2	23	29	80	29	1328	148.8	9.28	1012	99.4	103.9	99.3	100.6	97.9	98.9	100.867	99.1333	-	1.01748	0.367945
P17535	JUND	Transcription factor jun-D OS=Homo sapiens OX=9606 GN=JUND PE=1 SV=3	6	2	4	2	347	35.2	7.37	53	97.5	101.8	103.3	96.1	96.9	104.4	100.867	99.1333	-	1.01748	0.61291
P62847	RPS24	40S ribosomal protein S24 OS=Homo sapiens OX=9606 GN=RPS24 PE=1 SV=1	31	4	18	4	133	15.4	10.78	242	94.8	104.1	103.7	93.2	103.2	101	100.867	99.1333	-	1.01748	0.706963
Q92551	IP6K1	Inositol hexakisphosphate kinase 1 OS=Homo sapiens OX=9606 GN=IP6K1 PE=1 SV=3	5	2	2	2	441	50.2	7.24	40	101.8	101.1	99.7	94.6	98.1	104.7	100.867	99.1333	-	1.01748	0.597282
Q9Y4K1	CRYBG1	Beta/gamma crystallin domain-containing protein 1 OS=Homo sapiens OX=9606 GN=CRYBG1 PE=1 SV=3	17	22	34	22	1723	188.6	5.86	458	97.4	101.3	104	101.6	97.7	98.2	100.9	99.1667	-	1.01748	0.488387
P49848	TAF6	Transcription initiation factor TFIID subunit 6 OS=Homo sapiens OX=9606 GN=TAF6 PE=1 SV=1	14	9	10	9	677	72.6	8.6	72	103.3	98.9	100.3	99	99	99.4	100.833	99.1333	-	1.01715	0.262524
P00390	GSR	Glutathione reductase, mitochondrial OS=Homo sapiens OX=9606 GN=GSR PE=1 SV=2	16	8	18	8	522	56.2	8.5	171	101.5	101.6	99.4	101.7	98.4	97.3	100.833	99.1333	-	1.01715	0.321545
Q14165	MLEC	Malectin OS=Homo sapiens OX=9606 GN=MLEC PE=1 SV=1	26	8	23	8	292	32.2	5.41	203	101.1	104.5	96.9	101.3	99.1	97	100.833	99.1333	-	1.01715	0.537572
P16435	POR	NADPH--cytochrome P450 reductase OS=Homo sapiens OX=9606 GN=POR PE=1 SV=2	32	22	56	22	677	76.6	5.58	558	101.9	101.5	99.1	99.2	100.2	98	100.833	99.1333	-	1.01715	0.190962
Q13439	GOLGA4	Golgin subfamily A member 4 OS=Homo sapiens OX=9606 GN=GOLGA4 PE=1 SV=1	17	38	55	37	2230	261	5.39	381	98.8	101.3	102.4	97.7	100.7	99	100.833	99.1333	-	1.01715	0.283769
Q9NQ50	MRPL40	39S ribosomal protein L40, mitochondrial OS=Homo sapiens OX=9606 GN=MRPL40 PE=1 SV=1	45	8	21	8	206	24.5	9.63	260	99.4	103.8	99.3	100.4	98.5	98.5	100.833	99.1333	-	1.01715	0.351402
Q86X19	TMEM17	Transmembrane protein 17 OS=Homo sapiens OX=9606 GN=TMEM17 PE=1 SV=2	8	2	4	2	198	23	6.79	24	99.3	101.5	101.7	101.2	97.7	98.5	100.833	99.1333	-	1.01715	0.263707
P60602	ROMO1	Reactive oxygen species modulator 1 OS=Homo sapiens OX=9606 GN=ROMO1 PE=1 SV=1	32	2	5	2	79	8.2	9.33	68	98	98.1	106.4	99.5	102.9	95	100.833	99.1333	-	1.01715	0.661643
O00116	AGPS	Alkyldihydroxyacetonephosphate synthase, peroxisomal OS=Homo sapiens OX=9606 GN=AGPS PE=1 SV=1	33	17	60	17	658	72.9	7.34	1525	102.7	101.5	98.4	98.7	98.2	100.6	100.867	99.1667	-	1.01714	0.313283
P41208	CETN2	Centrin-2 OS=Homo sapiens OX=9606 GN=CETN2 PE=1 SV=1	33	5	8	5	172	19.7	5	107	101.6	99.5	101.5	100.5	99.8	97.2	100.867	99.1667	-	1.01714	0.234241
Q9Y324	FCF1	rRNA-processing protein FCF1 homolog OS=Homo sapiens OX=9606 GN=FCF1 PE=2 SV=1	10	2	5	2	198	23.4	9.7	72	98.8	101.7	102.1	96.9	103	97.6	100.867	99.1667	-	1.01714	0.480917
Q9NXX6	NSMCE4A	Non-structural maintenance of chromosomes element 4 homolog A OS=Homo sapiens OX=9606 GN=NSMCE4A PE=1 SV=2	13	5	5	5	385	44.3	5.38	52	99	100.1	103.5	99.5	96.6	101.4	100.867	99.1667	-	1.01714	0.431391
Q9NPJ6	MED4	Mediator of RNA polymerase II transcription subunit 4 OS=Homo sapiens OX=9606 GN=MED4 PE=1 SV=1	9	2	5	2	270	29.7	5.1	45	100	104	98.6	99.5	96.9	101.1	100.867	99.1667	-	1.01714	0.449193
Q03252	LMNB2	Lamin-B2 OS=Homo sapiens OX=9606 GN=LMNB2 PE=1 SV=4	56	42	170	38	620	69.9	5.59	2113	102.9	103.1	96.6	101.2	97.2	99.1	100.867	99.1667	-	1.01714	0.522197
Q6NVY1	HIBCH	3-hydroxyisobutyryl-CoA hydrolase, mitochondrial OS=Homo sapiens OX=9606 GN=HIBCH PE=1 SV=2	27	11	15	11	386	43.5	8.19	130	103.9	100.8	97.9	100.1	97.9	99.5	100.867	99.1667	-	1.01714	0.410742
Q9BSH4	TACO1	Translational activator of cytochrome c oxidase 1 OS=Homo sapiens OX=9606 GN=TACO1 PE=1 SV=1	23	6	10	6	297	32.5	8.13	122	101.2	98.4	103	97.6	101.6	98.3	100.867	99.1667	-	1.01714	0.403137
Q7KZF4	SND1	Staphylococcal nuclease domain-containing protein 1 OS=Homo sapiens OX=9606 GN=SND1 PE=1 SV=1	37	29	108	29	910	101.9	7.17	1545	98.6	99.6	104.4	98	100.3	99.2	100.867	99.1667	-	1.01714	0.423584
P46778	RPL21	60S ribosomal protein L21 OS=Homo sapiens OX=9606 GN=RPL21 PE=1 SV=2	42	10	24	10	160	18.6	10.49	148	92.3	107.2	102.9	96.8	101.7	98.9	100.8	99.1333	-	1.01681	0.738116
Q9P0T7	TMEM9	Transmembrane protein 9 OS=Homo sapiens OX=9606 GN=TMEM9 PE=1 SV=1	21	3	7	2	183	20.6	6.65	78	96.9	102.8	102.8	99.4	99.5	98.6	100.833	99.1667	-	1.01681	0.448829
Q8NHP6	MOSPD2	Motile sperm domain-containing protein 2 OS=Homo sapiens OX=9606 GN=MOSPD2 PE=1 SV=1	2	1	1	1	518	59.7	5.96	27	97.8	100.7	104	99.4	98.9	99.2	100.833	99.1667	-	1.01681	0.406157
Q8NFC6	BOD1L1	Biorientation of chromosomes in cell division protein 1-like 1 OS=Homo sapiens OX=9606 GN=BOD1L1 PE=1 SV=2	2	5	5	5	3051	330.3	5.08	43	101.6	98	102.9	101.3	100.9	95.3	100.833	99.1667	-	1.01681	0.530283
Q14137	BOP1	Ribosome biogenesis protein BOP1 OS=Homo sapiens OX=9606 GN=BOP1 PE=1 SV=2	27	17	42	17	746	83.6	6.19	644	102.7	99	100.8	98	100.7	98.8	100.833	99.1667	-	1.01681	0.279953
Q9HB07	C12orf10	UPF0160 protein MYG1, mitochondrial OS=Homo sapiens OX=9606 GN=C12orf10 PE=1 SV=2	10	3	4	3	376	42.4	6.67	36	99.9	101.6	101	100.3	99.9	97.3	100.833	99.1667	-	1.01681	0.192333
Q9P0M6	H2AFY2	Core histone macro-H2A.2 OS=Homo sapiens OX=9606 GN=H2AFY2 PE=1 SV=3	37	11	29	10	372	40	9.69	337	99.5	101.1	101.9	100.9	98.8	97.8	100.833	99.1667	-	1.01681	0.22224
Q14690	PDCD11	Protein RRP5 homolog OS=Homo sapiens OX=9606 GN=PDCD11 PE=1 SV=3	26	46	83	46	1871	208.6	8.87	866	99.1	100.9	102.5	100.9	98.6	98	100.833	99.1667	-	1.01681	0.275687
Q9BYT8	NLN	Neurolysin, mitochondrial OS=Homo sapiens OX=9606 GN=NLN PE=1 SV=1	16	11	20	11	704	80.6	6.64	284	103.8	96.6	102.1	98.8	100.4	98.3	100.833	99.1667	-	1.01681	0.502336
Q96G21	IMP4	U3 small nucleolar ribonucleoprotein protein IMP4 OS=Homo sapiens OX=9606 GN=IMP4 PE=1 SV=1	16	5	11	5	291	33.7	9.47	77	102	102.4	98.1	97.8	98.4	101.3	100.833	99.1667	-	1.01681	0.39388
Q9UIW2	PLXNA1	Plexin-A1 OS=Homo sapiens OX=9606 GN=PLXNA1 PE=1 SV=3	7	15	16	15	1896	210.9	6.92	118	104	99.5	99	98.4	98.6	100.5	100.833	99.1667	-	1.01681	0.388661
Q12805	EFEMP1	EGF-containing fibulin-like extracellular matrix protein 1 OS=Homo sapiens OX=9606 GN=EFEMP1 PE=1 SV=2	9	4	4	4	493	54.6	5.07	22	104.6	99.5	98.4	100.8	98.6	98.1	100.833	99.1667	-	1.01681	0.468302
O43169	CYB5B	Cytochrome b5 type B OS=Homo sapiens OX=9606 GN=CYB5B PE=1 SV=3	58	5	16	5	150	16.7	4.97	419	110.4	98.2	93.9	96.5	101.1	99.9	100.833	99.1667	-	1.01681	0.761558
P31930	UQCRC1	Cytochrome b-c1 complex subunit 1, mitochondrial OS=Homo sapiens OX=9606 GN=UQCRC1 PE=1 SV=3	36	15	57	15	480	52.6	6.37	1072	101.1	100.9	100.5	99.1	98.5	99.9	100.833	99.1667	-	1.01681	0.0196233
Q96H55	MYO19	Unconventional myosin-XIX OS=Homo sapiens OX=9606 GN=MYO19 PE=1 SV=2	8	7	11	7	970	109.1	7.71	137	101.9	100.1	100.5	99.4	99.9	98.2	100.833	99.1667	-	1.01681	0.0883466
P62750	RPL23A	60S ribosomal protein L23a OS=Homo sapiens OX=9606 GN=RPL23A PE=1 SV=1	40	9	57	9	156	17.7	10.45	641	92.6	102.9	107	97.9	100.5	99.1	100.833	99.1667	-	1.01681	0.721035
Q08426	EHHADH	Peroxisomal bifunctional enzyme OS=Homo sapiens OX=9606 GN=EHHADH PE=1 SV=3	18	13	20	13	723	79.4	9.14	110	102.3	100.5	99.7	99.1	100.5	97.9	100.833	99.1667	-	1.01681	0.195974
P33981	TTK	Dual specificity protein kinase TTK OS=Homo sapiens OX=9606 GN=TTK PE=1 SV=2	2	2	2	2	857	97	8.16	25	105.6	98	98.9	96.8	99.5	101.2	100.833	99.1667	-	1.01681	0.572933
P05204	HMGN2	Non-histone chromosomal protein HMG-17 OS=Homo sapiens OX=9606 GN=HMGN2 PE=1 SV=3	46	5	14	4	90	9.4	9.99	37	99.3	104.9	98.2	99.7	100.4	97.4	100.8	99.1667	-	1.01647	0.510509
O60831	PRAF2	PRA1 family protein 2 OS=Homo sapiens OX=9606 GN=PRAF2 PE=1 SV=1	26	4	14	4	178	19.2	9.19	147	102.7	100.5	99.2	102.2	99.4	95.9	100.8	99.1667	-	1.01647	0.478006
Q9C0C4	SEMA4C	Semaphorin-4C OS=Homo sapiens OX=9606 GN=SEMA4C PE=1 SV=2	8	5	8	5	833	92.6	7.28	77	101.4	97.8	103.2	99.5	99.4	98.6	100.8	99.1667	-	1.01647	0.368469
O43837	IDH3B	Isocitrate dehydrogenase [NAD] subunit beta, mitochondrial OS=Homo sapiens OX=9606 GN=IDH3B PE=1 SV=2	28	10	35	10	385	42.2	8.46	516	101.2	101.1	100.1	98.2	99.6	99.7	100.8	99.1667	-	1.01647	0.0524071
Q7L3T8	PARS2	Probable proline--tRNA ligase, mitochondrial OS=Homo sapiens OX=9606 GN=PARS2 PE=1 SV=1	8	3	3	3	475	53.2	8.1	38	103.9	102	96.5	98.2	98.8	100.5	100.8	99.1667	-	1.01647	0.520806
O00410	IPO5	Importin-5 OS=Homo sapiens OX=9606 GN=IPO5 PE=1 SV=4	15	18	31	18	1097	123.6	4.94	351	102.4	95.5	104.6	99.8	98.6	99.2	100.833	99.2	-	1.01647	0.586218
P22413	ENPP1	Ectonucleotide pyrophosphatase/phosphodiesterase family member 1 OS=Homo sapiens OX=9606 GN=ENPP1 PE=1 SV=2	1	1	2	1	925	104.9	7.14	17	100.6	103.9	98	104.5	94.8	98.3	100.833	99.2	-	1.01647	0.647581
Q9BYG3	NIFK	MKI67 FHA domain-interacting nucleolar phosphoprotein OS=Homo sapiens OX=9606 GN=NIFK PE=1 SV=1	54	15	39	15	293	34.2	9.88	450	98.5	103	101	99.2	99	99.4	100.833	99.2	-	1.01647	0.279488
O76095	JTB	Protein JTB OS=Homo sapiens OX=9606 GN=JTB PE=1 SV=1	5	1	2	1	146	16.3	8.28	31	102.9	102.7	96.9	93.4	100.3	103.9	100.833	99.2	-	1.01647	0.678116
P49914	MTHFS	5-formyltetrahydrofolate cyclo-ligase OS=Homo sapiens OX=9606 GN=MTHFS PE=1 SV=2	25	5	5	5	203	23.2	7.88	42	108.4	99.4	94.7	100.2	99.2	98.2	100.833	99.2	-	1.01647	0.70807
Q5XKE5	KRT79	Keratin, type II cytoskeletal 79 OS=Homo sapiens OX=9606 GN=KRT79 PE=1 SV=2	10	7	60	1	535	57.8	7.2	197	102.1	101.2	99.1	100	97.7	99.9	100.8	99.2	-	1.01613	0.241018
Q9NRL3	STRN4	Striatin-4 OS=Homo sapiens OX=9606 GN=STRN4 PE=1 SV=2	5	3	3	2	753	80.5	5.4	48	108.5	94.6	99.3	104.9	96.1	96.6	100.8	99.2	-	1.01613	0.76411
Q8NE71	ABCF1	ATP-binding cassette sub-family F member 1 OS=Homo sapiens OX=9606 GN=ABCF1 PE=1 SV=2	28	22	44	21	845	95.9	6.8	632	95.5	101.9	105	97.8	101.3	98.5	100.8	99.2	-	1.01613	0.621434
Q9NNW7	TXNRD2	Thioredoxin reductase 2, mitochondrial OS=Homo sapiens OX=9606 GN=TXNRD2 PE=1 SV=3	19	9	19	8	524	56.5	7.5	241	100	99.4	103	101.3	99	97.3	100.8	99.2	-	1.01613	0.375849
Q9H9A6	LRRC40	Leucine-rich repeat-containing protein 40 OS=Homo sapiens OX=9606 GN=LRRC40 PE=1 SV=1	8	5	5	5	602	68.2	6.43	33	105.2	93.3	103.9	98.2	98.1	101.3	100.8	99.2	-	1.01613	0.703519
Q9NRK6	ABCB10	ATP-binding cassette sub-family B member 10, mitochondrial OS=Homo sapiens OX=9606 GN=ABCB10 PE=1 SV=2	15	10	14	10	738	79.1	9.85	143	99.5	102.1	100.8	99.6	98.6	99.4	100.8	99.2	-	1.01613	0.119558
P62913	RPL11	60S ribosomal protein L11 OS=Homo sapiens OX=9606 GN=RPL11 PE=1 SV=2	36	7	33	7	178	20.2	9.6	341	93.6	105.9	102.9	95.7	100.7	101.2	100.8	99.2	-	1.01613	0.716114
Q9NXR7	BABAM2	BRISC and BRCA1-A complex member 2 OS=Homo sapiens OX=9606 GN=BABAM2 PE=1 SV=2	3	1	1	1	383	43.5	5.81	18	106.7	97.4	98.3	98.8	99.7	99.1	100.8	99.2	-	1.01613	0.619029
P53621	COPA	Coatomer subunit alpha OS=Homo sapiens OX=9606 GN=COPA PE=1 SV=2	30	34	75	34	1224	138.3	7.66	919	97.9	103.8	100.7	96.9	100.8	99.9	100.8	99.2	-	1.01613	0.483093
Q3ZAQ7	VMA21	Vacuolar ATPase assembly integral membrane protein VMA21 OS=Homo sapiens OX=9606 GN=VMA21 PE=1 SV=1	22	2	22	2	101	11.3	7.24	283	98.9	103.5	99.9	100.9	97.2	99.5	100.767	99.2	-	1.01579	0.424837
Q9Y6A4	CFAP20	Cilia- and flagella-associated protein 20 OS=Homo sapiens OX=9606 GN=CFAP20 PE=1 SV=1	21	4	6	4	193	22.8	9.76	92	101.1	97.5	103.7	99.3	99.3	99	100.767	99.2	-	1.01579	0.433287
P43490	NAMPT	Nicotinamide phosphoribosyltransferase OS=Homo sapiens OX=9606 GN=NAMPT PE=1 SV=1	9	5	13	5	491	55.5	7.15	56	98.9	98.4	105	93.6	102.8	101.2	100.767	99.2	-	1.01579	0.681229
Q15554	TERF2	Telomeric repeat-binding factor 2 OS=Homo sapiens OX=9606 GN=TERF2 PE=1 SV=3	4	2	2	2	542	59.6	9.35	35	95.8	102.7	103.9	103.4	97.5	96.8	100.8	99.2333	-	1.01579	0.657728
P05141	SLC25A5	ADP/ATP translocase 2 OS=Homo sapiens OX=9606 GN=SLC25A5 PE=1 SV=7	43	17	102	7	298	32.8	9.69	964	100.2	103.4	98.8	98.3	98.5	100.9	100.8	99.2333	-	1.01579	0.382192
Q6PI78	TMEM65	Transmembrane protein 65 OS=Homo sapiens OX=9606 GN=TMEM65 PE=1 SV=2	18	4	12	4	240	25.5	8.6	91	104.6	99.2	98.6	101.6	98.1	98	100.8	99.2333	-	1.01579	0.523753
O95721	SNAP29	Synaptosomal-associated protein 29 OS=Homo sapiens OX=9606 GN=SNAP29 PE=1 SV=1	19	4	7	4	258	29	5.81	83	100.4	99.8	102.2	100.3	99	98.4	100.8	99.2333	-	1.01579	0.161482
P24539	ATP5PB	ATP synthase F(0) complex subunit B1, mitochondrial OS=Homo sapiens OX=9606 GN=ATP5PB PE=1 SV=2	29	7	48	7	256	28.9	9.36	531	101.5	100.4	100.4	101.6	99.1	97	100.767	99.2333	-	1.01545	0.328562
P26196	DDX6	Probable ATP-dependent RNA helicase DDX6 OS=Homo sapiens OX=9606 GN=DDX6 PE=1 SV=2	26	10	22	10	483	54.4	8.66	287	101.2	103.6	97.5	86.4	95.5	115.8	100.767	99.2333	-	1.01545	0.871139
Q96PK6	RBM14	RNA-binding protein 14 OS=Homo sapiens OX=9606 GN=RBM14 PE=1 SV=2	32	25	74	25	669	69.4	9.67	766	99.8	103	99.5	99.6	98	100.1	100.767	99.2333	-	1.01545	0.299253
Q13505	MTX1	Metaxin-1 OS=Homo sapiens OX=9606 GN=MTX1 PE=1 SV=3	24	10	22	10	466	51.4	9.79	392	100.9	101.7	99.7	101.3	98.2	98.2	100.767	99.2333	-	1.01545	0.265529
[truncated: 2,637 more rows]
