# Supplementary material for: Transcriptome and proteome analysis of the antitumor activity of maslinic acid against pancreatic cancer cells
Source: Aging (Albany NY). 2021 Oct 12;13(19):23308–27. doi: 10.18632/aging.203623 (PMC8544341; doi:10.18632/aging.203623)
Supplement: Supplementary Table 3 [file aging-13-203623-s004.xlsx]

## Sheet: MA_PANC1 VS PANC1
Supplementary Table 3. A complete list of proteins identified in PANC-1 cells with and without MA treatment.
Accession	GeneName	Description	Coverage [%]	# Peptides	# PSMs	# Unique Peptides	# AAs	MW [kDa]	calc. pI	Score Mascot: Mascot	Abundances MA_PANC1_1	Abundances MA_PANC1_2	Abundances MA_PANC1_3	Abundances PANC1_1	Abundances PANC1_2	Abundances PANC1_3	Average MA_PANC1	Average PANC1	Regulation	MA_PANC1/PANC1	P value
P02792	FTL	Ferritin light chain OS=Homo sapiens OX=9606 GN=FTL PE=1 SV=2	18	3	5	3	175	20	5.78	45	135.9	144	122.7	75.8	58.8	62.9	134.2	65.8333	UP	2.03848	0.00105283
Q9BUI4	POLR3C	DNA-directed RNA polymerase III subunit RPC3 OS=Homo sapiens OX=9606 GN=POLR3C PE=1 SV=1	2	1	1	1	534	60.6	7.31	0	142.3	113.3	104.6	85.3	76.5	77.9	120.067	79.9	UP	1.50271	0.0265988
P69891	HBG1	Hemoglobin subunit gamma-1 OS=Homo sapiens OX=9606 GN=HBG1 PE=1 SV=2	22	3	14	2	147	16.1	7.2	93	136.5	112.1	109.8	83.3	80.6	77.7	119.467	80.5333	UP	1.48344	0.011006
Q3SY84	KRT71	Keratin, type II cytoskeletal 71 OS=Homo sapiens OX=9606 GN=KRT71 PE=1 SV=3	5	3	26	2	523	57.3	6.61	114	120.1	126.2	106.2	85.2	81.4	80.9	117.5	82.5	UP	1.42424	0.00449443
Q9H8M2	BRD9	Bromodomain-containing protein 9 OS=Homo sapiens OX=9606 GN=BRD9 PE=1 SV=2	1	1	5	1	597	67	6.19	47	135.9	104.7	109.2	87.4	82.4	80.3	116.6	83.3667	UP	1.39864	0.0289445
Q9ULE4	FAM184B	Protein FAM184B OS=Homo sapiens OX=9606 GN=FAM184B PE=2 SV=3	1	1	7	1	1060	121	6.18	25	121.2	124.3	103.3	82.6	84.6	83.9	116.267	83.7	UP	1.38909	0.00772735
Q9NVT9	ARMC1	Armadillo repeat-containing protein 1 OS=Homo sapiens OX=9606 GN=ARMC1 PE=1 SV=1	11	4	6	4	282	31.3	5.74	69	115.7	133.8	99	83	85.3	83.2	116.167	83.8333	UP	1.38569	0.0326166
P19320	VCAM1	Vascular cell adhesion protein 1 OS=Homo sapiens OX=9606 GN=VCAM1 PE=1 SV=1	1	1	4	1	739	81.2	5.22	34	116.3	126.5	104.1	86.1	83.6	83.5	115.633	84.4	UP	1.37006	0.00875842
O75764	TCEA3	Transcription elongation factor A protein 3 OS=Homo sapiens OX=9606 GN=TCEA3 PE=1 SV=2	2	1	1	1	348	38.9	9.19	0	132.5	106.1	105.9	86.5	83	86	114.833	85.1667	UP	1.34834	0.0290242
Q14376	GALE	UDP-glucose 4-epimerase OS=Homo sapiens OX=9606 GN=GALE PE=1 SV=2	8	2	2	2	348	38.3	6.73	31	113.6	123.5	107.1	77.8	92.5	85.4	114.733	85.2333	UP	1.34611	0.00987146
Q9UBP0	SPAST	Spastin OS=Homo sapiens OX=9606 GN=SPAST PE=1 SV=1	1	1	3	1	616	67.2	9.64	0	116	119.3	108.4	83.9	87.6	84.8	114.567	85.4333	UP	1.34101	0.00103492
Q9NP64	ZCCHC17	Nucleolar protein of 40 kDa OS=Homo sapiens OX=9606 GN=ZCCHC17 PE=1 SV=1	11	2	3	2	241	27.6	9.7	52	106.3	111.2	120.3	86.5	88.3	87.3	112.6	87.3667	UP	1.28882	0.00364729
Q14147	DHX34	Probable ATP-dependent RNA helicase DHX34 OS=Homo sapiens OX=9606 GN=DHX34 PE=1 SV=2	2	1	1	1	1143	128	7.56	42	105.8	114	117.9	76.9	87.9	97.5	112.567	87.4333	UP	1.28746	0.0223038
P13196	ALAS1	5-aminolevulinate synthase, nonspecific, mitochondrial OS=Homo sapiens OX=9606 GN=ALAS1 PE=1 SV=2	5	4	4	4	640	70.5	8.46	38	106.3	108.8	120.6	86.7	89	88.5	111.9	88.0667	UP	1.27063	0.00593127
P10643	C7	Complement component C7 OS=Homo sapiens OX=9606 GN=C7 PE=1 SV=2	1	1	2	1	843	93.5	6.48	28	107.8	117.6	109.3	91.8	85.7	87.8	111.567	88.4333	UP	1.26159	0.00281532
Q9BTL3	RAMAC	RNA guanine-N7 methyltransferase activating subunit OS=Homo sapiens OX=9606 GN=RAMAC PE=1 SV=1	11	1	1	1	118	14.4	8.94	0	110.4	114.4	109.2	91.1	85.9	88.9	111.333	88.6333	UP	1.25611	0.000478437
P48058	GRIA4	Glutamate receptor 4 OS=Homo sapiens OX=9606 GN=GRIA4 PE=1 SV=2	1	1	2	1	902	100.8	8.1	0	117.2	113.9	102.8	84.1	88.1	94	111.3	88.7333	UP	1.25432	0.0124086
Q3B726	TWISTNB	DNA-directed RNA polymerase I subunit RPA43 OS=Homo sapiens OX=9606 GN=TWISTNB PE=1 SV=1	5	2	2	2	338	37.4	6.98	0	112.9	116.5	104.4	84.8	88.7	92.8	111.267	88.7667	UP	1.25347	0.00619631
Q68CQ7	GLT8D1	Glycosyltransferase 8 domain-containing protein 1 OS=Homo sapiens OX=9606 GN=GLT8D1 PE=1 SV=2	18	7	11	7	371	41.9	9.35	85	106.4	110.6	116.2	88.7	89.8	88.3	111.067	88.9333	UP	1.24888	0.00152935
O75385	ULK1	Serine/threonine-protein kinase ULK1 OS=Homo sapiens OX=9606 GN=ULK1 PE=1 SV=2	1	1	4	1	1050	112.6	8.79	48	114.5	108.3	109.2	79.4	94.8	93.9	110.667	89.3667	UP	1.23834	0.016402
Q9UPY5	SLC7A11	Cystine/glutamate transporter OS=Homo sapiens OX=9606 GN=SLC7A11 PE=1 SV=1	3	2	5	2	501	55.4	9.19	18	107.9	116.3	107.8	91.3	90	86.8	110.667	89.3667	UP	1.23834	0.00240178
Q9NZP5	OR5AC2	Olfactory receptor 5AC2 OS=Homo sapiens OX=9606 GN=OR5AC2 PE=3 SV=2	2	1	1	1	309	35.3	8.94	25	111.3	121.1	99.4	91.7	86.7	89.7	110.6	89.3667	UP	1.2376	0.0300158
P21397	MAOA	Amine oxidase [flavin-containing] A OS=Homo sapiens OX=9606 GN=MAOA PE=1 SV=1	9	4	6	4	527	59.6	7.85	18	117.7	98.7	115.4	84.7	87.9	95.6	110.6	89.4	UP	1.23714	0.0356849
Q693B1	KCTD11	BTB/POZ domain-containing protein KCTD11 OS=Homo sapiens OX=9606 GN=KCTD11 PE=1 SV=1	3	1	2	1	232	25.9	6.68	0	114.7	104.5	112.5	86.4	87.2	94.7	110.567	89.4333	UP	1.2363	0.00656922
P04424	ASL	Argininosuccinate lyase OS=Homo sapiens OX=9606 GN=ASL PE=1 SV=4	2	1	1	1	464	51.6	6.48	0	116.6	114.2	99.9	90.7	89.4	89.2	110.233	89.7667	UP	1.228	0.0173898
Q02156	PRKCE	Protein kinase C epsilon type OS=Homo sapiens OX=9606 GN=PRKCE PE=1 SV=1	3	2	2	1	737	83.6	7.12	29	103.2	104.5	122.8	88.1	89.9	91.5	110.167	89.8333	UP	1.22635	0.0336858
P01023	A2M	Alpha-2-macroglobulin OS=Homo sapiens OX=9606 GN=A2M PE=1 SV=3	3	4	16	4	1474	163.2	6.46	157	121.8	101.8	106.4	94.9	88.3	86.8	110	90	UP	1.22222	0.0377174
Q6NXT4	SLC30A6	Zinc transporter 6 OS=Homo sapiens OX=9606 GN=SLC30A6 PE=1 SV=2	7	3	7	3	461	51.1	9.16	82	115	103.4	111.5	89.9	87.8	92.4	109.967	90.0333	UP	1.2214	0.00564928
P02765	AHSG	Alpha-2-HS-glycoprotein OS=Homo sapiens OX=9606 GN=AHSG PE=1 SV=2	5	2	4	2	367	39.3	5.72	41	117.8	113.2	98.8	86.5	90.3	93.4	109.933	90.0667	UP	1.22058	0.0305598
Q9H0G5	NSRP1	Nuclear speckle splicing regulatory protein 1 OS=Homo sapiens OX=9606 GN=NSRP1 PE=1 SV=1	5	3	5	3	558	66.4	8.84	69	102	112.7	115.1	91.5	88.7	90	109.933	90.0667	UP	1.22058	0.008418
Q96EX3	WDR34	WD repeat-containing protein 34 OS=Homo sapiens OX=9606 GN=WDR34 PE=1 SV=2	2	1	2	1	536	57.8	6.64	0	112.7	116.8	100.1	91	90.5	88.9	109.867	90.1333	UP	1.21893	0.0175946
P00738	HP	Haptoglobin OS=Homo sapiens OX=9606 GN=HP PE=1 SV=1	6	3	6	3	406	45.2	6.58	30	99.4	120.7	109.4	90.3	89.2	91	109.833	90.1667	UP	1.21811	0.0333766
Q9NZ45	CISD1	CDGSH iron-sulfur domain-containing protein 1 OS=Homo sapiens OX=9606 GN=CISD1 PE=1 SV=1	35	3	7	3	108	12.2	9.09	106	110.6	117	101.5	96.9	89.2	84.9	109.7	90.3333	UP	1.21439	0.0274079
P32004	L1CAM	Neural cell adhesion molecule L1 OS=Homo sapiens OX=9606 GN=L1CAM PE=1 SV=2	15	14	21	14	1257	139.9	6.24	307	107.4	108.2	113.3	93.7	87.5	89.9	109.633	90.3667	UP	1.21321	0.00172638
Q9HAU0	PLEKHA5	Pleckstrin homology domain-containing family A member 5 OS=Homo sapiens OX=9606 GN=PLEKHA5 PE=1 SV=1	3	2	2	2	1116	127.4	7.53	22	103.2	118.1	107.4	90.7	86.4	94.2	109.567	90.4333	UP	1.21157	0.0183809
P02649	APOE	Apolipoprotein E OS=Homo sapiens OX=9606 GN=APOE PE=1 SV=1	5	2	4	2	317	36.1	5.73	47	115.4	105.7	107.5	92.4	86.7	92.2	109.533	90.4333	UP	1.21121	0.00557131
P02748	C9	Complement component C9 OS=Homo sapiens OX=9606 GN=C9 PE=1 SV=2	4	2	6	2	559	63.1	5.59	96	115.3	108.9	103.9	91.4	90.2	90.2	109.367	90.6	UP	1.20714	0.00484331
Q9H1C4	UNC93B1	Protein unc-93 homolog B1 OS=Homo sapiens OX=9606 GN=UNC93B1 PE=1 SV=2	4	2	2	2	597	66.6	6.96	17	105.1	107.1	115.7	91.5	91.7	88.8	109.3	90.6667	UP	1.20551	0.00530307
P35749	MYH11	Myosin-11 OS=Homo sapiens OX=9606 GN=MYH11 PE=1 SV=3	8	16	46	1	1972	227.2	5.5	595	108	115	104.6	85.6	91.6	95.3	109.2	90.8333	UP	1.2022	0.0116187
Q05682	CALD1	Caldesmon OS=Homo sapiens OX=9606 GN=CALD1 PE=1 SV=3	13	9	11	9	793	93.2	5.66	116	90.9	86.4	95.4	103	109.2	115.2	90.9	109.133	DOWN	0.832926	0.0140753
Q9BQB6	VKORC1	Vitamin K epoxide reductase complex subunit 1 OS=Homo sapiens OX=9606 GN=VKORC1 PE=1 SV=1	19	3	7	3	163	18.2	9.36	18	99.6	84.5	88.3	107.9	109	110.7	90.8	109.2	DOWN	0.831502	0.0162147
Q9Y4Z0	LSM4	U6 snRNA-associated Sm-like protein LSm4 OS=Homo sapiens OX=9606 GN=LSM4 PE=1 SV=1	22	3	3	3	139	15.3	9.99	38	86.9	94.6	90.8	116.9	104.7	106.1	90.7667	109.233	DOWN	0.830943	0.0142581
Q9H7P9	PLEKHG2	Pleckstrin homology domain-containing family G member 2 OS=Homo sapiens OX=9606 GN=PLEKHG2 PE=1 SV=3	4	5	5	5	1386	147.9	5.86	24	93	87.8	91	101.1	111.8	115.4	90.6	109.433	DOWN	0.827901	0.0144233
O75054	IGSF3	Immunoglobulin superfamily member 3 OS=Homo sapiens OX=9606 GN=IGSF3 PE=2 SV=3	7	7	9	7	1194	135.1	6.07	72	90.1	93	87.1	101.5	113.1	115.1	90.0667	109.9	DOWN	0.819533	0.0122435
P78504	JAG1	Protein jagged-1 OS=Homo sapiens OX=9606 GN=JAG1 PE=1 SV=3	4	5	8	5	1218	133.7	6.06	86	90.6	89.7	89	110.3	112	108.4	89.7667	110.233	DOWN	0.814333	5.62306e-05
Q9NXB9	ELOVL2	Elongation of very long chain fatty acids protein 2 OS=Homo sapiens OX=9606 GN=ELOVL2 PE=1 SV=2	3	1	2	1	296	34.6	9.26	34	88	83.8	97.4	112.5	111.2	107.2	89.7333	110.3	DOWN	0.813539	0.00893781
O00762	UBE2C	Ubiquitin-conjugating enzyme E2 C OS=Homo sapiens OX=9606 GN=UBE2C PE=1 SV=1	6	1	1	1	179	19.6	7.37	18	96.5	81.1	91	113.4	107.9	110	89.5333	110.433	DOWN	0.810746	0.0119641
P04792	HSPB1	Heat shock protein beta-1 OS=Homo sapiens OX=9606 GN=HSPB1 PE=1 SV=2	39	7	21	7	205	22.8	6.4	430	97.5	82.3	88.2	108.9	111.9	111.2	89.3333	110.667	DOWN	0.807229	0.0091459
Q15417	CNN3	Calponin-3 OS=Homo sapiens OX=9606 GN=CNN3 PE=1 SV=1	11	3	5	3	329	36.4	6.05	145	92.9	78.8	92.6	100.2	117.2	118.3	88.1	111.9	DOWN	0.78731	0.0334796
P67936	TPM4	Tropomyosin alpha-4 chain OS=Homo sapiens OX=9606 GN=TPM4 PE=1 SV=3	41	14	58	5	248	28.5	4.69	602	88.5	84.9	90.2	101.5	118	116.8	87.8667	112.1	DOWN	0.783824	0.0119015
Q12765	SCRN1	Secernin-1 OS=Homo sapiens OX=9606 GN=SCRN1 PE=1 SV=2	5	2	2	2	414	46.4	4.75	54	91.7	74	96.5	112.7	122.2	103	87.4	112.633	DOWN	0.775969	0.0456643
P06753	TPM3	Tropomyosin alpha-3 chain OS=Homo sapiens OX=9606 GN=TPM3 PE=1 SV=2	32	11	51	4	285	32.9	4.72	372	88.3	80.6	90.2	99.6	121.3	120	86.3667	113.633	DOWN	0.760047	0.0231546
Q96A00	PPP1R14A	Protein phosphatase 1 regulatory subunit 14A OS=Homo sapiens OX=9606 GN=PPP1R14A PE=1 SV=1	7	1	2	1	147	16.7	9.38	30	87.3	78.7	91.5	108.4	117.1	117	85.8333	114.167	DOWN	0.751825	0.00394855
P09493	TPM1	Tropomyosin alpha-1 chain OS=Homo sapiens OX=9606 GN=TPM1 PE=1 SV=2	38	14	54	5	284	32.7	4.74	409	85.8	76	80.8	100.5	128.2	128.8	80.8667	119.167	DOWN	0.678601	0.0171536
P07951	TPM2	Tropomyosin beta chain OS=Homo sapiens OX=9606 GN=TPM2 PE=1 SV=1	41	16	53	5	284	32.8	4.7	459	76.9	64.9	73.8	97.6	146.3	140.5	71.8667	128.133	DOWN	0.560874	0.023436
